# Supplementary material for: DNA methylation-environment interactions in the human genome
Source: bioRxiv preprint, doi:10.1101/2023.05.19.541437, version 2 (2023-12-15)
Supplement: Supplementary File 3 [file 541437_file04.xlsx]

## Sheet: sheet1
Genomic_window	methylation_p	RNA_in_methylation_p	RNA_in_unmethylation_p	methylation_beta	RNA_in_methylation_beta	RNA_in_unmethylation_beta	methylation_se	RNA_in_methylation_se	RNA_in_unmethylation_se	RNA_in_methylation_FDR	RNA_in_unmethylation_FDR	RNAxmethylation_beta	RNAxmethylation_se	RNAxmethylation_t	RNAxmethylation_p	RNAxmethylation_FDR
chr1_100028400_100029000	0.297657	0.038035	0.00050572	0.126641	-4.14964	-6.9606	0.120221	1.94275	1.86023	NA	NA	NA	NA	NA	NA	NA
chr1_100029000_100029600	0.24388	0.0329056	0.00071143	0.143179	-4.32992	-6.87786	0.12129	1.9686	1.89525	NA	NA	NA	NA	NA	NA	NA
chr1_100037400_100038000	0.978991	0.0353756	0.418578	0.00392658	-3.50051	-1.27717	0.148298	1.61471	1.56473	NA	NA	NA	NA	NA	NA	NA
chr1_100038000_100038600	0.422594	0.125116	0.543982	0.125574	-2.33627	0.879096	0.155193	1.49559	1.43798	0.0979843	0.148092	-3.21536	2.07475	-1.54976	0.136879	0.0312127
chr1_100071600_100072200	0.494917	0.152671	0.00389065	0.0960919	-3.19493	-6.42864	0.139672	2.197	2.11439	NA	NA	NA	NA	NA	NA	NA
chr1_100072200_100072800	0.58662	0.134944	0.00368612	0.077921	-3.44103	-6.66002	0.142298	2.26141	2.1765	NA	NA	NA	NA	NA	NA	NA
chr1_100077600_100078200	0.456752	0.0628886	0.000152561	0.0869408	-3.67202	-7.72202	0.115838	1.92641	1.87095	NA	NA	NA	NA	NA	NA	NA
chr1_1000800_1001400	0.604212	0.0755031	0.598337	0.0862203	-3.14802	-0.88237	0.16519	1.73113	1.66338	NA	NA	NA	NA	NA	NA	NA
chr1_100129800_100130400	0.289139	0.160915	0.00132014	0.137288	-2.8097	-6.6115	0.128022	1.97177	1.93289	NA	NA	NA	NA	NA	NA	NA
chr1_100130400_100131000	0.529286	0.163215	0.00164701	0.0827891	-2.85248	-6.59978	0.130603	2.01302	1.97334	NA	NA	NA	NA	NA	NA	NA
chr1_100132200_100132800	0.00413831	6.19488e-06	0.0333434	-0.311039	-7.55191	-3.16756	0.103061	1.47966	1.44391	NA	NA	NA	NA	NA	NA	NA
chr1_100132800_100133400	0.00934234	8.00304e-05	0.00874258	-0.27973	-6.21286	-3.82138	0.103097	1.43508	1.39528	NA	NA	NA	NA	NA	NA	NA
chr1_100133400_100134000	0.275237	0.00564821	0.00120293	-0.124893	-5.26173	-6.09091	0.113105	1.81212	1.76433	NA	NA	NA	NA	NA	NA	NA
chr1_1001400_1002000	0.919146	0.00653659	0.219411	0.0154981	-5.77978	-2.46204	0.15184	2.02864	1.97744	NA	NA	NA	NA	NA	NA	NA
chr1_100178400_100179000	0.764781	0.354051	0.0196591	0.0443979	-1.96511	-4.93892	0.147508	2.099	2.04321	NA	NA	NA	NA	NA	NA	NA
chr1_100213200_100213800	0.0467975	0.324265	0.00325146	0.279952	-1.98213	-6.01347	0.137026	1.98929	1.93662	NA	NA	NA	NA	NA	NA	NA
chr1_100249200_100249800	0.360556	0.115677	1.58302e-05	-0.0946628	-2.13728	-6.21543	0.102503	1.33292	1.2885	NA	NA	NA	NA	NA	NA	NA
chr1_100249800_100250400	0.369143	0.153844	3.91116e-05	-0.0980519	-2.00416	-6.07912	0.108108	1.38219	1.33614	NA	NA	NA	NA	NA	NA	NA
chr1_100250400_100251000	0.001428	0.0248927	0.000480127	0.408646	-4.48312	-6.95818	0.120416	1.93326	1.85115	NA	NA	NA	NA	NA	NA	NA
chr1_100265400_100266000	0.0467001	2.90816e-07	0.155991	-0.200627	-8.04345	-1.85664	0.0981537	1.34092	1.28728	NA	NA	NA	NA	NA	NA	NA
chr1_100266000_100266600	0.163243	9.81104e-07	0.113101	-0.137041	-7.56943	-2.08013	0.0967182	1.34086	1.28784	NA	NA	NA	NA	NA	NA	NA
chr1_100266600_100267200	0.62607	0.000408001	0.00216261	-0.052479	-6.52972	-5.42136	0.106978	1.71293	1.66827	NA	NA	NA	NA	NA	NA	NA
chr1_1003200_1003800	0.150427	0.0124907	0.000650293	0.163316	-4.61009	-6.35959	0.111676	1.77312	1.73815	NA	NA	NA	NA	NA	NA	NA
chr1_10032600_10033200	0.302201	0.000142163	0.205804	-0.131448	-6.53251	-1.97197	0.125977	1.57425	1.53661	NA	NA	NA	NA	NA	NA	NA
chr1_10033200_10033800	0.200961	6.27914e-06	0.0611441	-0.138266	-7.31801	-2.68378	0.106572	1.43496	1.39822	NA	NA	NA	NA	NA	NA	NA
chr1_100347600_100348200	0.407348	0.745998	0.000637096	-0.135047	0.394985	4.34022	0.161495	1.21208	1.18403	0.543404	0.00509888	-3.94524	1.69442	-2.32837	0.0304964	0.0108649
chr1_100351200_100351800	0.25608	0.0347809	0.000311543	-0.132161	-3.98566	-6.95568	0.114921	1.83222	1.78375	NA	NA	NA	NA	NA	NA	NA
chr1_100351800_100352400	0.422422	0.121533	0.000228899	-0.0940663	-2.5628	-6.33327	0.11621	1.6246	1.58392	NA	NA	NA	NA	NA	NA	NA
chr1_100352400_100353000	0.142683	0.140623	0.194604	-0.209834	-2.24538	-1.89271	0.140697	1.49761	1.43794	NA	NA	NA	NA	NA	NA	NA
chr1_100353000_100353600	0.774494	0.021854	0.37245	-0.0435987	-4.05792	-1.49984	0.151283	1.70971	1.66524	NA	NA	NA	NA	NA	NA	NA
chr1_1003800_1004400	0.975705	0.21081	2.77615e-06	-0.00307242	-1.85325	-7.60732	0.10034	1.46036	1.42438	NA	NA	NA	NA	NA	NA	NA
chr1_1004400_1005000	0.953745	0.296502	1.42532e-05	0.00647689	-1.67948	-7.53237	0.111055	1.59049	1.55137	NA	NA	NA	NA	NA	NA	NA
chr1_100440000_100440600	0.240362	0.598063	0.0377617	0.185391	0.843818	-3.26516	0.155862	1.58951	1.52638	0.457822	0.014579	4.10898	2.20372	1.86457	0.0769858	0.0204087
chr1_100485000_100485600	0.258531	0.29416	0.00332295	0.15838	-2.28724	-6.50338	0.138442	2.15544	2.09967	NA	NA	NA	NA	NA	NA	NA
chr1_100485600_100486200	0.770772	0.462921	0.00909259	0.0433151	-1.64151	-5.90429	0.147788	2.21757	2.16774	NA	NA	NA	NA	NA	NA	NA
chr1_100498800_100499400	0.120488	0.0270482	0.000417264	0.182903	-3.9088	-6.34585	0.115611	1.71155	1.6679	NA	NA	NA	NA	NA	NA	NA
chr1_1005000_1005600	0.0770408	0.0160724	0.0140117	0.225363	-4.31201	-4.29467	0.124602	1.72526	1.68129	NA	NA	NA	NA	NA	NA	NA
chr1_100538400_100539000	0.429624	0.0428415	0.0851753	-0.103051	-3.07394	-2.50007	0.129321	1.47577	1.42106	NA	NA	NA	NA	NA	NA	NA
chr1_100539000_100539600	0.720426	0.773466	0.243402	-0.0517567	-0.425717	-1.683	0.143732	1.4703	1.42424	NA	NA	NA	NA	NA	NA	NA
chr1_100557600_100558200	0.048156	0.255837	0.00172179	0.266389	-2.36591	-6.65151	0.131223	2.05622	1.99798	NA	NA	NA	NA	NA	NA	NA
chr1_1005600_1006200	0.252763	0.369063	0.000755874	0.149639	-1.46896	-5.70752	0.129201	1.61934	1.58156	NA	NA	NA	NA	NA	NA	NA
chr1_1006200_1006800	0.414319	0.213517	0.000562183	0.0906843	-1.69363	-4.79473	0.110084	1.34264	1.29344	NA	NA	NA	NA	NA	NA	NA
chr1_1006800_1007400	0.515304	0.0045288	0.00139106	0.0720213	-4.20896	-4.61727	0.109845	1.41	1.35698	NA	NA	NA	NA	NA	NA	NA
chr1_100719000_100719600	0.0154124	0.0912526	0.000194055	0.301295	-3.44283	-7.83393	0.11974	1.99593	1.93377	NA	NA	NA	NA	NA	NA	NA
chr1_100719600_100720200	0.0371907	0.114325	0.00040235	0.273325	-3.41739	-7.89614	0.127372	2.12313	2.06891	NA	NA	NA	NA	NA	NA	NA
chr1_1007400_1008000	0.612168	8.16857e-05	0.0146268	-0.057	-7.06067	-4.03939	0.111663	1.63331	1.59205	NA	NA	NA	NA	NA	NA	NA
chr1_1008000_1008600	0.499973	0.0050806	0.00491724	-0.0809695	-5.21611	-5.10247	0.11909	1.77248	1.7268	NA	NA	NA	NA	NA	NA	NA
chr1_100894200_100894800	0.807281	0.416368	0.000294313	-0.0291785	-1.15806	-5.33839	0.118929	1.41204	1.36259	NA	NA	NA	NA	NA	NA	NA
chr1_100894800_100895400	0.322233	0.069228	0.000221791	-0.113584	-2.89901	-6.08949	0.113511	1.55828	1.51913	NA	NA	NA	NA	NA	NA	NA
chr1_100895400_100896000	0.17162	0.233009	3.19021e-05	-0.157784	-2.12406	-7.89627	0.113623	1.75753	1.71216	NA	NA	NA	NA	NA	NA	NA
chr1_100896000_100896600	0.920297	0.0435746	0.00116679	0.0127892	-4.00071	-6.50407	0.127117	1.92776	1.87836	NA	NA	NA	NA	NA	NA	NA
chr1_101025600_101026200	0.754918	0.111979	1.70124e-07	0.0285267	-2.58123	-9.55194	0.0908406	1.59295	1.55224	NA	NA	NA	NA	NA	NA	NA
chr1_101026200_101026800	0.568132	0.339686	1.10168e-06	0.0592774	-1.55244	-8.79994	0.103102	1.60907	1.56823	NA	NA	NA	NA	NA	NA	NA
chr1_101128200_101128800	0.0431366	0.614494	0.575138	0.320184	-0.729295	0.786888	0.153945	1.43812	1.39389	0.468788	0.158025	-1.51618	2.00277	-0.757041	0.457852	0.0848456
chr1_101199600_101200200	0.836067	0.128405	0.00807606	-0.0377227	-2.40432	4.17563	0.18127	1.55289	1.50794	0.100563	0.00941242	-6.57995	2.16457	-3.03985	0.00646797	0.00421509
chr1_1012200_1012800	0.0157205	0.0657185	0.00014749	0.292451	-3.62461	-7.75017	0.116595	1.92261	1.87293	NA	NA	NA	NA	NA	NA	NA
chr1_101235600_101236200	0.320215	0.0514537	0.00801939	0.12774	-3.13114	-4.19746	0.127121	1.56578	1.51435	NA	NA	NA	NA	NA	NA	NA
chr1_101236200_101236800	0.78354	0.136129	0.00433721	0.0339543	-2.25329	-4.28107	0.122881	1.48544	1.4266	NA	NA	NA	NA	NA	NA	NA
chr1_101238600_101239200	0.531567	0.0115679	0.000110088	-0.0693565	-4.97952	-7.81673	0.110024	1.89322	1.84797	NA	NA	NA	NA	NA	NA	NA
chr1_101239200_101239800	0.0826421	0.00743085	0.00368093	-0.213163	-4.55928	-4.8657	0.120144	1.62788	1.58985	NA	NA	NA	NA	NA	NA	NA
chr1_101278800_101279400	0.100629	0.00301957	0.38863	0.25855	-5.02982	1.34615	0.154317	1.60614	1.54668	0.00677486	0.0998237	-6.37597	2.22978	-2.85946	0.00969107	0.00533039
chr1_1012800_1013400	0.626832	0.139174	7.36962e-05	-0.0545579	-2.40825	-6.79307	0.111463	1.60023	1.55988	NA	NA	NA	NA	NA	NA	NA
chr1_101309400_101310000	0.499859	0.000309816	0.0495168	0.081995	-6.06025	-3.03711	0.120566	1.5534	1.50552	NA	NA	NA	NA	NA	NA	NA
chr1_101310000_101310600	0.884782	0.000328125	0.0647926	-0.0176263	-5.91736	-2.7946	0.120963	1.52402	1.47706	NA	NA	NA	NA	NA	NA	NA
chr1_101313600_101314200	0.188804	0.00566646	0.000237538	0.153216	-5.42656	-7.13702	0.114864	1.86966	1.79024	NA	NA	NA	NA	NA	NA	NA
chr1_101314200_101314800	0.257612	0.0138404	0.000879439	0.143098	-5.13344	-6.83379	0.124839	2.0058	1.92061	NA	NA	NA	NA	NA	NA	NA
chr1_101315400_101316000	0.927788	0.00656882	0.000117726	0.00992811	-5.35902	-7.69783	0.10895	1.88218	1.82895	NA	NA	NA	NA	NA	NA	NA
chr1_1013400_1014000	0.707322	0.0702274	0.00118617	0.0382898	-2.34339	-4.20561	0.101351	1.2643	1.21654	NA	NA	NA	NA	NA	NA	NA
chr1_1014000_1014600	0.438873	0.0557862	0.00187873	0.0903168	-2.87062	-4.63637	0.115661	1.46285	1.40546	NA	NA	NA	NA	NA	NA	NA
chr1_1014600_1015200	0.90507	0.379157	0.0189299	0.0163646	-1.3295	-3.49725	0.136465	1.49718	1.43756	NA	NA	NA	NA	NA	NA	NA
chr1_101661600_101662200	0.154318	0.174243	0.00836678	-0.206192	-3.01722	-5.77107	0.14237	2.18633	2.0943	NA	NA	NA	NA	NA	NA	NA
chr1_10186200_10186800	0.281773	0.305888	0.00600806	-0.150179	-2.14771	-5.84136	0.13789	2.07426	2.0278	NA	NA	NA	NA	NA	NA	NA
chr1_101996400_101997000	0.427104	0.00189803	9.33333e-05	-0.0787463	-6.03224	-7.67529	0.098279	1.83057	1.79268	NA	NA	NA	NA	NA	NA	NA
chr1_101997000_101997600	0.260709	0.0245395	3.06267e-05	-0.115677	-3.81123	-7.3864	0.101585	1.63927	1.5973	NA	NA	NA	NA	NA	NA	NA
chr1_1020600_1021200	0.799213	0.219978	0.0220963	0.0376833	-2.33467	-4.33686	0.147291	1.87748	1.83077	NA	NA	NA	NA	NA	NA	NA
chr1_1021200_1021800	0.569577	0.149689	7.79403e-05	-0.0661498	-2.48343	-7.16694	0.115487	1.69504	1.65232	NA	NA	NA	NA	NA	NA	NA
chr1_1021800_1022400	0.481627	0.0463282	3.88718e-05	-0.0752549	-3.52866	-7.63875	0.106076	1.72328	1.67824	NA	NA	NA	NA	NA	NA	NA
chr1_1022400_1023000	0.0545617	0.790152	8.72244e-07	-0.200351	-0.3791	-7.84429	0.101565	1.41631	1.38117	NA	NA	NA	NA	NA	NA	NA
chr1_1023000_1023600	0.040668	0.710746	6.41383e-05	-0.261555	-0.661639	-7.59918	0.124181	1.77309	1.72794	NA	NA	NA	NA	NA	NA	NA
chr1_1023600_1024200	0.738022	0.0145233	0.0132261	0.0420732	-3.87919	-3.84206	0.125031	1.5272	1.49071	NA	NA	NA	NA	NA	NA	NA
chr1_1024200_1024800	0.30144	0.170352	0.0699459	0.13915	-2.02068	-2.59302	0.133146	1.45073	1.39752	NA	NA	NA	NA	NA	NA	NA
chr1_1024800_1025400	0.388783	0.342831	0.0574246	-0.131793	-1.57696	-3.07989	0.151476	1.64528	1.58036	NA	NA	NA	NA	NA	NA	NA
chr1_1025400_1026000	0.300898	0.0248179	0.00209353	0.12618	-4.23053	-5.78897	0.120599	1.82334	1.77518	NA	NA	NA	NA	NA	NA	NA
chr1_1026000_1026600	0.0441447	0.577298	1.7841e-05	0.238365	-0.878375	-7.30535	0.115182	1.56482	1.52582	NA	NA	NA	NA	NA	NA	NA
chr1_1026600_1027200	0.927622	0.397464	2.17113e-06	-0.00940336	-1.2944	-7.99722	0.102953	1.51548	1.47742	NA	NA	NA	NA	NA	NA	NA
chr1_1027200_1027800	0.981568	0.559422	1.89791e-07	-0.0022221	-0.806574	-8.19584	0.0956586	1.37178	1.33875	NA	NA	NA	NA	NA	NA	NA
chr1_1027800_1028400	0.372405	0.027195	0.000185806	0.102805	-4.29322	-7.48587	0.114131	1.88178	1.84158	NA	NA	NA	NA	NA	NA	NA
chr1_1028400_1029000	0.0587698	0.0395626	0.00338175	0.272581	-4.72868	-6.60644	0.140649	2.23208	2.1373	NA	NA	NA	NA	NA	NA	NA
chr1_1030200_1030800	0.773072	0.0257721	0.0296116	0.0376802	-4.51877	-4.31377	0.129904	1.96103	1.92144	NA	NA	NA	NA	NA	NA	NA
chr1_103107600_103108200	0.720911	0.0150373	0.00487429	-0.0340322	-3.2462	-3.68096	0.0946813	1.28504	1.24436	NA	NA	NA	NA	NA	NA	NA
chr1_103108200_103108800	0.705982	0.0560869	0.0114659	-0.0313399	-1.95801	-2.56745	0.0825583	0.999067	0.974859	NA	NA	NA	NA	NA	NA	NA
chr1_1032000_1032600	0.932314	0.0474175	0.000687464	0.0100445	-3.83593	-6.71814	0.117617	1.88305	1.84545	NA	NA	NA	NA	NA	NA	NA
chr1_1032600_1033200	0.63208	0.254887	0.0052959	-0.0659582	-2.21754	-5.4853	0.136838	1.92337	1.87371	NA	NA	NA	NA	NA	NA	NA
chr1_103326600_103327200	0.114277	0.500177	0.0618914	0.255422	-1.39374	-3.82382	0.158665	2.0509	1.99813	NA	NA	NA	NA	NA	NA	NA
chr1_1035000_1035600	0.729596	0.24984	0.000954404	0.0464413	-2.38991	-7.05969	0.133539	2.05062	1.99956	NA	NA	NA	NA	NA	NA	NA
chr1_103525800_103526400	0.56856	0.00493166	0.000192094	0.0609316	-5.21785	-7.02015	0.106097	1.76648	1.73151	NA	NA	NA	NA	NA	NA	NA
chr1_1035600_1036200	0.431242	0.674332	0.000860554	-0.103756	-0.655882	-5.37762	0.130667	1.55089	1.50827	NA	NA	NA	NA	NA	NA	NA
chr1_1036200_1036800	0.732055	0.359373	0.0111401	-0.0428356	1.18478	-3.27192	0.124349	1.27972	1.23705	0.282755	0.0100832	4.4567	1.77987	2.50394	0.0210557	0.00854659
chr1_1036800_1037400	0.540082	0.311148	3.51332e-05	-0.0715829	1.31637	-5.65747	0.115962	1.28541	1.23458	0.244103	0.00187991	6.97384	1.78226	3.91291	0.000862361	0.00136632
chr1_10374600_10375200	0.488145	0.355406	0.144043	0.108837	1.18518	1.84043	0.155731	1.26953	1.23834	0.279442	0.0355395	-0.655255	1.77347	-0.369477	0.715656	0.127787
chr1_10378200_10378800	0.0310873	0.207666	0.0197077	-0.323207	-2.57273	-4.73889	0.145319	2.01312	1.96128	NA	NA	NA	NA	NA	NA	NA
chr1_1038000_1038600	0.724893	0.2371	4.14205e-05	0.0399812	-2.11894	-7.80535	0.112914	1.76892	1.72219	NA	NA	NA	NA	NA	NA	NA
chr1_10398000_10398600	0.616731	0.0121914	0.183648	-0.0768822	-4.57175	-2.27746	0.152572	1.75193	1.68712	NA	NA	NA	NA	NA	NA	NA
chr1_10398600_10399200	0.896561	0.030801	0.222154	-0.0211673	-4.03374	-2.15335	0.16192	1.81038	1.73999	NA	NA	NA	NA	NA	NA	NA
chr1_10399800_10400400	0.296607	0.00102877	0.00770816	0.120692	-5.85022	-4.53429	0.114322	1.66897	1.62704	NA	NA	NA	NA	NA	NA	NA
chr1_10400400_10401000	0.777401	0.0107384	0.0734427	0.0383943	-4.7048	-3.16004	0.135015	1.7692	1.725	NA	NA	NA	NA	NA	NA	NA
chr1_10414800_10415400	0.0951679	0.972294	0.801996	-0.286199	0.0563861	-0.393321	0.167979	1.61471	1.55945	0.63168	0.231688	0.449707	2.24481	0.200332	0.843244	0.149152
chr1_10415400_10416000	0.103766	0.218453	0.985188	-0.298611	2.04752	-0.029694	0.179914	1.64104	1.5908	0.170193	0.285432	2.07722	2.28553	0.908856	0.374248	0.0713863
chr1_10429800_10430400	0.211249	0.0747634	0.0171608	-0.152234	-2.48551	-3.2742	0.120078	1.36322	1.32408	NA	NA	NA	NA	NA	NA	NA
chr1_10430400_10431000	0.157108	0.696428	0.0279769	-0.183826	0.517441	-2.87273	0.127805	1.31799	1.26586	0.517276	0.0129584	3.39017	1.82743	1.85516	0.0783744	0.0206561
chr1_1043400_1044000	0.310611	0.0100379	0.0641269	-0.150695	-5.07406	-3.50049	0.146986	1.88942	1.84536	NA	NA	NA	NA	NA	NA	NA
chr1_1044000_1044600	0.125795	0.0108159	0.00379702	-0.187613	-4.2238	-4.70658	0.120325	1.59	1.54352	NA	NA	NA	NA	NA	NA	NA
chr1_1044600_1045200	0.572159	0.0731482	0.000425226	-0.0656103	-2.73866	-5.47608	0.115319	1.49339	1.44163	NA	NA	NA	NA	NA	NA	NA
chr1_10449600_10450200	0.444375	0.24255	0.0011245	0.092185	-1.68745	-4.7563	0.119493	1.42538	1.36866	NA	NA	NA	NA	NA	NA	NA
chr1_10450200_10450800	0.404628	0.440329	0.000119694	0.102718	-1.21907	-6.42491	0.122119	1.56616	1.5284	NA	NA	NA	NA	NA	NA	NA
chr1_1045200_1045800	0.759861	0.10793	0.000259946	-0.036273	-2.48368	-5.84739	0.117966	1.51491	1.47745	NA	NA	NA	NA	NA	NA	NA
chr1_1045800_1046400	0.246378	0.0103875	0.00252244	-0.138284	-4.28713	-4.99994	0.117774	1.60433	1.56467	NA	NA	NA	NA	NA	NA	NA
chr1_10461600_10462200	0.462307	0.00052433	0.0376639	-0.0906829	-6.44444	-3.60413	0.122337	1.72777	1.68394	NA	NA	NA	NA	NA	NA	NA
chr1_1046400_1047000	0.319737	0.0167424	0.0208251	0.13186	-4.00248	-3.76539	0.131091	1.61207	1.5732	NA	NA	NA	NA	NA	NA	NA
chr1_1047000_1047600	0.802201	0.0787754	0.200496	0.0279485	-2.20549	-1.55104	0.110928	1.22679	1.19424	NA	NA	NA	NA	NA	NA	NA
chr1_10471200_10471800	0.475104	0.00182792	0.00677358	-0.0847764	-6.27583	-5.24811	0.117728	1.89696	1.85072	NA	NA	NA	NA	NA	NA	NA
chr1_10471800_10472400	0.338544	0.00418779	0.000658352	-0.103759	-5.08679	-6.01098	0.107288	1.6879	1.6447	NA	NA	NA	NA	NA	NA	NA
chr1_10472400_10473000	0.532419	0.00253527	0.000235658	-0.0654929	-5.3693	-6.53247	0.104112	1.6812	1.63755	NA	NA	NA	NA	NA	NA	NA
chr1_10474200_10474800	0.765768	3.42745e-05	0.641917	0.034023	-5.88127	-0.576848	0.11353	1.28131	1.2323	NA	NA	NA	NA	NA	NA	NA
chr1_10474800_10475400	0.593922	0.000349178	0.651796	0.0622067	-4.82198	0.548724	0.115862	1.24838	1.20802	0.00330763	0.183202	-5.3707	1.73717	-3.09164	0.00575288	0.00394356
chr1_10475400_10476000	0.753286	0.00342431	0.93572	-0.0419731	-4.32192	-0.109133	0.132745	1.40025	1.34578	NA	NA	NA	NA	NA	NA	NA
chr1_1047600_1048200	0.991262	0.450799	0.471759	0.00121211	-0.819731	-0.764296	0.110073	1.0778	1.05333	NA	NA	NA	NA	NA	NA	NA
chr1_1048200_1048800	0.399153	0.870535	0.187785	-0.125767	0.245967	-1.94149	0.14778	1.5008	1.45209	0.597279	0.0457268	2.18746	2.08829	1.04749	0.307369	0.0603968
chr1_10498200_10498800	0.00326539	0.0759367	0.00166741	0.379958	-3.26548	-5.85042	0.122425	1.79848	1.7515	NA	NA	NA	NA	NA	NA	NA
chr1_10510200_10510800	0.295625	7.72517e-07	0.0176085	0.123477	-6.72075	2.79601	0.116719	1.17602	1.13551	0.00245825	0.0112624	-9.51676	1.63475	-5.82153	1.07375e-05	0.000182545
chr1_10510800_10511400	0.170397	0.00244646	0.00124712	0.177077	-3.52732	3.68875	0.127144	1.10011	1.07233	0.00622274	0.00622242	-7.21607	1.53627	-4.69713	0.000138339	0.00049883
chr1_1051200_1051800	0.139115	0.297303	0.00197249	0.198978	-1.70157	-5.16448	0.132197	1.61411	1.57364	NA	NA	NA	NA	NA	NA	NA
chr1_1051800_1052400	0.739665	0.104089	0.000348264	0.0386195	-2.55628	-5.81633	0.11552	1.54164	1.50548	NA	NA	NA	NA	NA	NA	NA
chr1_10534800_10535400	0.199263	0.19806	5.77463e-05	0.153527	-2.44322	-8.06726	0.117881	1.87083	1.82097	NA	NA	NA	NA	NA	NA	NA
chr1_10535400_10536000	0.109716	0.0744844	3.4825e-06	0.16519	-3.23492	-9.10063	0.101281	1.77248	1.72554	NA	NA	NA	NA	NA	NA	NA
chr1_1053600_1054200	0.520647	0.193209	3.44896e-05	-0.0718706	-2.19327	-7.42528	0.111029	1.66098	1.61837	NA	NA	NA	NA	NA	NA	NA
chr1_10536000_10536600	0.222803	0.473843	5.88839e-06	0.136281	-1.1802	-8.15158	0.110277	1.63424	1.59246	NA	NA	NA	NA	NA	NA	NA
chr1_1054200_1054800	0.846972	0.733978	5.81947e-06	0.0215287	-0.508767	-7.44296	0.110931	1.48803	1.45303	NA	NA	NA	NA	NA	NA	NA
chr1_1054800_1055400	0.643406	0.207099	0.00117136	0.0664675	-2.8472	-7.49671	0.142631	2.22506	2.16587	NA	NA	NA	NA	NA	NA	NA
chr1_10555800_10556400	0.810918	0.000102624	0.204207	0.0298664	-6.65937	-1.97007	0.124122	1.56623	1.52963	NA	NA	NA	NA	NA	NA	NA
chr1_10556400_10557000	0.899999	0.000103003	0.445153	-0.0166903	-7.36058	-1.30022	0.132087	1.73162	1.68829	NA	NA	NA	NA	NA	NA	NA
chr1_105630600_105631200	0.0934665	0.474283	0.0103498	0.248641	-1.43742	-5.17189	0.14516	1.9924	1.93441	NA	NA	NA	NA	NA	NA	NA
chr1_10564200_10564800	0.00170596	0.0925115	0.0768567	0.480145	-3.39106	-3.50243	0.144087	1.97379	1.93523	NA	NA	NA	NA	NA	NA	NA
chr1_10564800_10565400	0.000781638	0.0689236	0.0555834	0.488634	-3.53574	-3.65559	0.135822	1.89838	1.86127	NA	NA	NA	NA	NA	NA	NA
chr1_10595400_10596000	0.487431	0.0738322	0.00683083	0.0999427	-4.02227	-5.9637	0.142769	2.19875	2.10542	NA	NA	NA	NA	NA	NA	NA
chr1_10597200_10597800	0.285042	0.0316665	0.00133613	0.13255	-4.34421	-6.55528	0.122544	1.96026	1.91876	NA	NA	NA	NA	NA	NA	NA
chr1_10605000_10605600	0.209591	0.0950327	0.00166027	-0.16582	-3.41999	-6.5462	0.130311	2.00645	1.95894	NA	NA	NA	NA	NA	NA	NA
chr1_106072200_106072800	0.48199	0.233093	0.00553223	0.108792	-2.91251	-6.86057	0.153476	2.41036	2.3565	NA	NA	NA	NA	NA	NA	NA
chr1_10612800_10613400	0.934593	0.0238579	0.000288976	0.00960272	-4.26486	-6.97801	0.116371	1.82508	1.77842	NA	NA	NA	NA	NA	NA	NA
chr1_10613400_10614000	0.696179	0.201137	1.64454e-06	0.0391684	-1.95723	-8.08461	0.0996806	1.50918	1.47144	NA	NA	NA	NA	NA	NA	NA
chr1_1061400_1062000	0.742882	0.0503372	0.00254853	-0.0420068	-3.77247	-5.83657	0.127285	1.87704	1.82857	NA	NA	NA	NA	NA	NA	NA
chr1_10614000_10614600	0.31921	0.349738	8.56003e-07	0.103071	-1.53977	-9.03083	0.102356	1.62987	1.58855	NA	NA	NA	NA	NA	NA	NA
chr1_10614600_10615200	0.870107	0.111975	0.000483516	0.0203608	-3.1773	-7.217	0.123822	1.96078	1.92119	NA	NA	NA	NA	NA	NA	NA
chr1_10615800_10616400	0.280589	0.0387983	0.000614909	0.129051	-3.56736	-6.01127	0.118197	1.67705	1.63467	NA	NA	NA	NA	NA	NA	NA
chr1_10616400_10617000	0.446633	0.133307	0.000856421	-0.0947358	-2.47331	-5.63085	0.123415	1.61844	1.57858	NA	NA	NA	NA	NA	NA	NA
chr1_1062600_1063200	0.629989	0.17222	3.87176e-06	0.0496695	-2.23893	-8.24721	0.102415	1.6146	1.57304	NA	NA	NA	NA	NA	NA	NA
chr1_10627200_10627800	0.55277	0.197862	8.39525e-05	0.0713596	-2.439	-7.83932	0.11933	1.86677	1.817	NA	NA	NA	NA	NA	NA	NA
chr1_10627800_10628400	0.241572	0.172278	0.00174508	0.161068	-2.96479	-6.94947	0.135767	2.13834	2.0904	NA	NA	NA	NA	NA	NA	NA
chr1_10629600_10630200	0.307748	0.051449	0.000107267	0.118191	-3.78513	-7.84999	0.114594	1.89279	1.85228	NA	NA	NA	NA	NA	NA	NA
chr1_10630200_10630800	0.435594	0.023504	7.09871e-05	0.0819838	-3.67545	-6.68283	0.104236	1.56865	1.53049	NA	NA	NA	NA	NA	NA	NA
chr1_10630800_10631400	0.5766	0.0968386	0.000412252	0.0670891	-2.85096	-6.24716	0.119299	1.68201	1.64026	NA	NA	NA	NA	NA	NA	NA
chr1_10631400_10632000	0.264874	0.136152	0.0122767	0.160808	-2.89629	-4.85186	0.142472	1.90944	1.86123	NA	NA	NA	NA	NA	NA	NA
chr1_1063200_1063800	0.118003	0.168871	0.000102987	0.182446	-2.18266	-6.48102	0.114528	1.56148	1.52468	NA	NA	NA	NA	NA	NA	NA
chr1_10632000_10632600	0.241703	0.0461391	0.00267582	0.14853	-3.67667	-5.54992	0.125235	1.79394	1.74821	NA	NA	NA	NA	NA	NA	NA
chr1_10632600_10633200	0.123834	0.0549662	0.000454069	0.190397	-3.96538	-7.32268	0.12146	2.01368	1.93871	NA	NA	NA	NA	NA	NA	NA
chr1_10634400_10635000	0.159276	0.338158	0.000415641	0.19232	-1.9286	-7.38797	0.134425	1.99257	1.94115	NA	NA	NA	NA	NA	NA	NA
chr1_10635000_10635600	0.888497	0.476823	6.08245e-05	-0.016275	-1.02571	-6.12221	0.115437	1.42999	1.38693	NA	NA	NA	NA	NA	NA	NA
chr1_10635600_10636200	0.134422	0.0669966	0.00128726	-0.183484	-2.77787	-4.88994	0.120418	1.48068	1.42599	NA	NA	NA	NA	NA	NA	NA
chr1_10636800_10637400	0.634544	0.127035	0.000537248	0.0620988	-3.21701	-7.5531	0.129772	2.07014	2.02936	NA	NA	NA	NA	NA	NA	NA
chr1_10637400_10638000	0.452023	0.127845	0.000450538	0.0967809	-3.14559	-7.51636	0.127596	2.0286	1.98864	NA	NA	NA	NA	NA	NA	NA
chr1_10639200_10639800	0.166915	0.000207918	0.0103935	-0.161242	-7.69187	-4.89847	0.114812	1.90906	1.83326	NA	NA	NA	NA	NA	NA	NA
chr1_10639800_10640400	0.872484	0.000368863	0.0016893	0.0170082	-6.65115	-5.62037	0.105379	1.7299	1.68491	NA	NA	NA	NA	NA	NA	NA
chr1_10640400_10641000	0.368593	0.107607	0.000216053	0.106768	-2.48044	-5.91784	0.117582	1.5115	1.47323	NA	NA	NA	NA	NA	NA	NA
chr1_10641000_10641600	0.94484	0.7157	7.52863e-05	0.00818659	-0.513687	-5.9207	0.11768	1.40175	1.36163	NA	NA	NA	NA	NA	NA	NA
chr1_10641600_10642200	0.542881	0.728416	0.0151261	-0.0826551	-0.507422	-3.52086	0.134832	1.45245	1.39508	NA	NA	NA	NA	NA	NA	NA
chr1_10642800_10643400	0.865299	0.142127	0.01388	-0.0260205	-3.06355	-5.11554	0.152538	2.05123	1.99969	NA	NA	NA	NA	NA	NA	NA
chr1_10644000_10644600	0.762673	0.00696335	0.0132982	0.0379667	-4.43337	-3.94647	0.124986	1.56917	1.5325	NA	NA	NA	NA	NA	NA	NA
chr1_10644600_10645200	0.372596	0.0198686	0.00368081	0.110146	-3.59426	-4.41132	0.12233	1.48962	1.44138	NA	NA	NA	NA	NA	NA	NA
chr1_10645200_10645800	0.216285	0.0233178	0.0137336	0.164468	-3.71733	-3.95388	0.131186	1.58427	1.54305	NA	NA	NA	NA	NA	NA	NA
chr1_10647000_10647600	0.77911	0.274658	0.00134978	0.0381984	-2.11112	-6.35	0.135394	1.90952	1.86057	NA	NA	NA	NA	NA	NA	NA
chr1_10647600_10648200	0.921995	0.0911936	0.0129046	0.013554	-2.78215	-4.05683	0.13766	1.61261	1.5681	NA	NA	NA	NA	NA	NA	NA
chr1_10650600_10651200	0.0780531	0.222131	0.00236608	0.250906	-2.56767	-6.49962	0.139215	2.07466	2.01971	NA	NA	NA	NA	NA	NA	NA
chr1_10651200_10651800	0.245468	0.0793454	0.00121432	0.150728	-3.5652	-6.67102	0.128122	1.98702	1.93417	NA	NA	NA	NA	NA	NA	NA
chr1_10651800_10652400	0.781758	0.0112222	9.00086e-05	0.0302776	-4.99958	-7.78144	0.108656	1.89229	1.81269	NA	NA	NA	NA	NA	NA	NA
chr1_10653600_10654200	0.862898	0.0247111	0.000179764	-0.0191857	-3.82135	-6.53645	0.110482	1.6457	1.60388	NA	NA	NA	NA	NA	NA	NA
chr1_10654200_10654800	0.65676	0.0171387	8.92277e-05	0.0480028	-4.05344	-6.8626	0.107318	1.63886	1.59764	NA	NA	NA	NA	NA	NA	NA
chr1_10654800_10655400	0.631249	0.198567	0.000129338	0.057538	-2.15329	-6.7286	0.119078	1.65072	1.60996	NA	NA	NA	NA	NA	NA	NA
chr1_10655400_10656000	0.277193	0.912102	0.000631762	0.149707	-0.190867	-6.15414	0.136138	1.71959	1.6776	NA	NA	NA	NA	NA	NA	NA
chr1_10659600_10660200	0.750549	0.0283968	0.00258344	0.040462	-4.06204	-5.5769	0.126513	1.79496	1.74985	NA	NA	NA	NA	NA	NA	NA
chr1_10660200_10660800	0.881917	0.0325171	0.000593421	-0.017979	-4.16652	-6.78979	0.120368	1.88988	1.84049	NA	NA	NA	NA	NA	NA	NA
chr1_1066200_1066800	0.732594	0.0782243	0.000154879	0.0394269	-3.2553	-7.28334	0.114694	1.80728	1.7667	NA	NA	NA	NA	NA	NA	NA
chr1_10662600_10663200	0.402089	1.63968e-05	0.135461	0.0945763	-5.5117	1.68439	0.11183	1.14512	1.10846	0.00253275	0.0335903	-7.19609	1.59373	-4.51524	0.000211143	0.000596991
chr1_10663200_10663800	0.28203	0.0141726	0.0244421	-0.147332	-5.37514	-4.80728	0.13535	2.10803	2.06619	NA	NA	NA	NA	NA	NA	NA
chr1_10664400_10665000	0.944115	0.00779276	0.200712	0.0101661	-4.54866	-2.04753	0.144234	1.63462	1.57729	NA	NA	NA	NA	NA	NA	NA
chr1_10665000_10665600	0.462815	0.00137297	0.0684741	-0.0970119	-6.13689	-3.27591	0.131025	1.80121	1.75592	NA	NA	NA	NA	NA	NA	NA
chr1_10666200_10666800	0.220059	0.00337058	0.0110111	-0.151316	-5.18844	-4.33807	0.121706	1.6779	1.63732	NA	NA	NA	NA	NA	NA	NA
chr1_10666800_10667400	0.407625	0.00168571	0.0480557	-0.0996196	-4.78641	-2.81338	0.119201	1.43458	1.38522	NA	NA	NA	NA	NA	NA	NA
chr1_1066800_1067400	0.742219	0.506194	0.000216267	-0.0397866	-1.11944	-6.53958	0.120236	1.67075	1.62814	NA	NA	NA	NA	NA	NA	NA
chr1_10671600_10672200	0.224539	0.000609584	0.00148946	0.13182	-6.26023	-5.6006	0.107074	1.70104	1.6574	NA	NA	NA	NA	NA	NA	NA
chr1_10672200_10672800	0.590254	0.0254309	6.21715e-06	0.0528818	-3.68518	-7.93773	0.0975206	1.59537	1.55558	NA	NA	NA	NA	NA	NA	NA
chr1_10672800_10673400	0.580112	0.0147321	9.73805e-05	-0.0594725	-4.32447	-7.09552	0.106741	1.70634	1.66241	NA	NA	NA	NA	NA	NA	NA
chr1_10674600_10675200	0.538036	0.082992	0.00370475	-0.0802109	-3.12527	-5.25735	0.129283	1.76355	1.71913	NA	NA	NA	NA	NA	NA	NA
chr1_10675200_10675800	0.80883	0.0585771	0.0074412	-0.0329534	-3.63939	-5.12145	0.135426	1.87639	1.82895	NA	NA	NA	NA	NA	NA	NA
chr1_10675800_10676400	0.207162	0.10218	0.0234391	-0.180637	-2.72541	-3.70022	0.141186	1.63429	1.57844	NA	NA	NA	NA	NA	NA	NA
chr1_10676400_10677000	0.124763	0.134442	0.00688723	-0.212151	-2.80272	-5.0736	0.135681	1.83948	1.79314	NA	NA	NA	NA	NA	NA	NA
chr1_10678200_10678800	0.497562	0.0970259	0.00648228	-0.0993193	-3.52366	-5.78105	0.145257	2.08009	2.02686	NA	NA	NA	NA	NA	NA	NA
chr1_10678800_10679400	0.831847	0.363248	7.10677e-05	-0.0247804	-1.61648	-7.48185	0.116044	1.76028	1.71362	NA	NA	NA	NA	NA	NA	NA
chr1_10679400_10680000	0.160515	0.38754	0.00019176	0.164133	1.13756	-5.09856	0.115071	1.30399	1.25738	0.30494	0.00326833	6.23611	1.81147	3.44257	0.00257543	0.0024647
chr1_1068000_1068600	0.889877	0.0302067	0.0128904	0.0200055	-4.93332	-5.55682	0.143689	2.2058	2.14753	NA	NA	NA	NA	NA	NA	NA
chr1_10680000_10680600	0.23723	0.494436	0.0194665	0.133906	0.790162	-2.69873	0.111818	1.14723	1.11458	0.387116	0.0115437	3.48889	1.59951	2.18122	0.0412755	0.0133008
chr1_10680600_10681200	0.914447	0.18318	0.0155447	0.0142864	-2.02528	-3.64201	0.132253	1.49867	1.44938	NA	NA	NA	NA	NA	NA	NA
chr1_10683000_10683600	0.766736	0.048035	8.62368e-06	0.0297664	-3.14689	-7.56832	0.099751	1.54928	1.512	NA	NA	NA	NA	NA	NA	NA
chr1_10683600_10684200	0.751864	0.0359485	7.22701e-05	0.0328444	-3.06299	-5.96366	0.103258	1.4175	1.36753	NA	NA	NA	NA	NA	NA	NA
chr1_1068600_1069200	0.982378	0.305646	0.0270713	-0.00301907	-1.72917	-3.7183	0.135942	1.66918	1.62839	NA	NA	NA	NA	NA	NA	NA
chr1_10686000_10686600	0.250357	0.092252	0.0356746	-0.165736	-3.41862	-4.19095	0.142364	1.9882	1.93649	NA	NA	NA	NA	NA	NA	NA
chr1_10686600_10687200	0.519929	0.0268798	0.00628177	0.0827775	-4.18989	-5.11412	0.127658	1.8325	1.78566	NA	NA	NA	NA	NA	NA	NA
chr1_10687200_10687800	0.456102	0.0473514	0.000681081	0.0885707	-3.43716	-5.9915	0.117838	1.68677	1.64444	NA	NA	NA	NA	NA	NA	NA
chr1_10687800_10688400	0.863901	0.102817	8.52861e-05	0.0194114	-3.00067	-7.57299	0.112613	1.80279	1.75727	NA	NA	NA	NA	NA	NA	NA
chr1_10688400_10689000	0.749828	0.840024	0.000142767	-0.0404605	-0.347581	-6.92324	0.126131	1.71215	1.66895	NA	NA	NA	NA	NA	NA	NA
chr1_10690200_10690800	0.374633	0.0271714	0.00318672	-0.107927	-3.98063	-5.29029	0.120382	1.74448	1.69978	NA	NA	NA	NA	NA	NA	NA
chr1_10691400_10692000	0.808336	0.0699912	0.00139252	0.0324454	-3.9969	-7.0414	0.132987	2.15452	2.06963	NA	NA	NA	NA	NA	NA	NA
chr1_10692000_10692600	0.0764157	0.193975	0.000368372	0.220473	-2.47331	-7.07118	0.121631	1.87634	1.83894	NA	NA	NA	NA	NA	NA	NA
chr1_10692600_10693200	0.153805	0.0377186	0.00190195	0.178277	-3.88952	-5.83347	0.122939	1.81782	1.77064	NA	NA	NA	NA	NA	NA	NA
chr1_10693200_10693800	0.0324708	0.0557824	0.00397901	0.269197	-3.46607	-5.21557	0.12207	1.76626	1.72002	NA	NA	NA	NA	NA	NA	NA
chr1_10696800_10697400	0.695192	0.378524	0.101565	-0.0605367	-1.4835	-2.69463	0.153535	1.66836	1.61285	NA	NA	NA	NA	NA	NA	NA
chr1_10697400_10698000	0.193306	0.098077	0.000758148	-0.160115	-2.83327	-5.90265	0.121283	1.67796	1.63608	NA	NA	NA	NA	NA	NA	NA
chr1_1069800_1070400	0.856147	0.0476093	0.298664	0.0250984	-2.96425	-1.4766	0.137676	1.45646	1.40471	NA	NA	NA	NA	NA	NA	NA
chr1_10698000_10698600	0.184566	0.130856	3.51169e-06	-0.135645	-2.54887	-8.50549	0.100699	1.65708	1.61345	NA	NA	NA	NA	NA	NA	NA
chr1_10698600_10699200	0.70148	0.709759	5.99031e-06	-0.0417666	-0.580032	-7.71866	0.108282	1.54885	1.50938	NA	NA	NA	NA	NA	NA	NA
chr1_10701600_10702200	0.324177	0.802791	8.8012e-05	-0.123893	-0.425184	-7.09484	0.124317	1.69273	1.65006	NA	NA	NA	NA	NA	NA	NA
chr1_10702200_10702800	0.0534399	0.52512	2.07014e-05	-0.237648	0.958987	-6.9336	0.119887	1.4976	1.46187	0.408584	0.00164348	7.89258	2.09281	3.77128	0.00120029	0.00165009
chr1_1070400_1071000	0.79553	0.0418089	0.0148314	-0.0354714	-3.44395	-4.06255	0.136092	1.64477	1.60469	NA	NA	NA	NA	NA	NA	NA
chr1_10705200_10705800	0.617366	0.566795	2.16719e-06	-0.0492209	-0.7503	-6.763	0.0978555	1.30049	1.24928	NA	NA	NA	NA	NA	NA	NA
chr1_107055600_107056200	0.275758	0.0512605	0.00115646	-0.133281	-3.57169	-6.02356	0.120834	1.78455	1.73808	NA	NA	NA	NA	NA	NA	NA
chr1_107056200_107056800	0.845946	0.034734	0.00098891	-0.0236543	-3.82944	-6.03713	0.12106	1.75993	1.71576	NA	NA	NA	NA	NA	NA	NA
chr1_107056800_107057400	0.253781	0.023542	0.0112736	-0.140282	-3.64273	-3.9425	0.121386	1.55513	1.49321	NA	NA	NA	NA	NA	NA	NA
chr1_107057400_107058000	0.311409	0.134968	0.00162997	-0.11528	-2.1332	-4.50884	0.11263	1.402	1.3467	NA	NA	NA	NA	NA	NA	NA
chr1_10705800_10706400	0.86792	0.565534	0.00233968	0.0178996	-0.729509	-3.94237	0.107035	1.26034	1.22356	NA	NA	NA	NA	NA	NA	NA
chr1_10706400_10707000	0.285051	0.00104645	0.115005	-0.143243	-5.72602	-2.56728	0.132432	1.63622	1.59805	NA	NA	NA	NA	NA	NA	NA
chr1_10707600_10708200	0.25741	0.15429	0.0275012	-0.172522	-2.98263	-4.56855	0.150443	2.05928	2.00665	NA	NA	NA	NA	NA	NA	NA
chr1_10708800_10709400	0.336903	0.00843225	0.0791479	-0.137002	-6.11262	-3.84643	0.141176	2.22065	2.1423	NA	NA	NA	NA	NA	NA	NA
chr1_10709400_10710000	0.92918	0.00416422	0.0160564	-0.0115587	-6.1305	-4.97211	0.129343	2.03284	1.98905	NA	NA	NA	NA	NA	NA	NA
chr1_107138400_107139000	0.772785	0.18925	0.00092721	0.0378043	-2.77407	-7.2035	0.130162	2.08182	2.03468	NA	NA	NA	NA	NA	NA	NA
chr1_107139000_107139600	0.294537	0.0196762	0.00270923	0.131519	-4.72161	-6.03429	0.124039	1.95359	1.90343	NA	NA	NA	NA	NA	NA	NA
chr1_107139600_107140200	0.998888	0.0045998	0.00931487	0.000166538	-4.50315	-4.00003	0.11886	1.51143	1.47363	NA	NA	NA	NA	NA	NA	NA
chr1_107140200_107140800	0.642367	0.000543021	0.0117419	-0.0550142	-6.42038	-4.41713	0.117684	1.72665	1.68315	NA	NA	NA	NA	NA	NA	NA
chr1_107140800_107141400	0.228834	0.00146108	0.000193995	0.139671	-6.3584	-7.28493	0.114523	1.87798	1.79821	NA	NA	NA	NA	NA	NA	NA
chr1_107141400_107142000	0.341392	0.102578	0.000144678	0.117706	-3.35996	-8.17472	0.122436	2.01721	1.97263	NA	NA	NA	NA	NA	NA	NA
chr1_107142000_107142600	0.314943	0.0615168	2.91168e-05	0.111506	-3.51595	-8.32347	0.10975	1.83451	1.79398	NA	NA	NA	NA	NA	NA	NA
chr1_10714800_10715400	0.693528	0.219944	9.03927e-05	-0.0466428	-2.29073	-7.70185	0.11762	1.84201	1.79471	NA	NA	NA	NA	NA	NA	NA
chr1_107148000_107148600	0.108169	0.773025	0.330738	0.244204	0.426908	-1.39263	0.149055	1.47147	1.41668	0.557234	0.0830919	1.81953	2.0426	0.890795	0.38363	0.0728638
chr1_107153400_107154000	0.00843583	0.424118	0.02433	0.410437	-1.61078	-4.54597	0.149116	1.99731	1.95226	NA	NA	NA	NA	NA	NA	NA
chr1_10715400_10716000	0.345816	0.197083	5.32729e-05	-0.105783	-1.90816	-6.34182	0.111057	1.45789	1.42352	NA	NA	NA	NA	NA	NA	NA
chr1_10716000_10716600	0.538144	0.0192968	0.000293043	-0.0676705	-3.9535	-6.22885	0.109099	1.63038	1.58931	NA	NA	NA	NA	NA	NA	NA
chr1_10716600_10717200	0.921604	0.0471178	0.00218645	0.0121254	-3.54198	-5.49297	0.122535	1.73629	1.69231	NA	NA	NA	NA	NA	NA	NA
chr1_10720200_10720800	0.899423	0.754692	5.12549e-05	-0.014319	0.402542	-5.49327	0.112668	1.28064	1.22977	0.547704	0.00208904	5.89581	1.77549	3.32066	0.00341065	0.00290578
chr1_10720800_10721400	0.644507	0.908475	9.03737e-05	0.0558209	0.160946	-5.74262	0.120184	1.3923	1.33814	0.611483	0.00248572	5.90357	1.9311	3.05711	0.00622056	0.00412701
chr1_1072200_1072800	0.944385	0.0128851	0.0108718	0.00869205	-4.49807	-4.49727	0.123921	1.73825	1.69423	NA	NA	NA	NA	NA	NA	NA
chr1_10722000_10722600	0.686635	0.0270884	0.000518674	-0.0463429	-3.80654	-6.06564	0.114149	1.66724	1.62466	NA	NA	NA	NA	NA	NA	NA
chr1_10723800_10724400	0.282671	9.2612e-05	0.0421458	0.126287	-6.52771	-3.11019	0.116173	1.52379	1.48793	NA	NA	NA	NA	NA	NA	NA
chr1_10726200_10726800	0.540473	0.00796152	0.00053201	-0.0774945	-5.82236	-7.48508	0.12566	2.09849	2.00934	NA	NA	NA	NA	NA	NA	NA
chr1_1072800_1073400	0.57339	0.000462581	0.135598	-0.0723103	-4.83264	1.88669	0.127505	1.28152	1.24204	0.00351204	0.033616	-6.71933	1.78465	-3.76508	0.00121779	0.00166726
chr1_10728600_10729200	0.489955	0.00328807	0.0526154	-0.0916256	-5.49967	-3.43981	0.131654	1.77345	1.72903	NA	NA	NA	NA	NA	NA	NA
chr1_1073400_1074000	0.95863	0.0771501	0.106866	0.00709632	-2.13039	1.89217	0.136061	1.17833	1.15053	0.0627632	0.0274529	-4.02256	1.64687	-2.44255	0.0239934	0.00932243
chr1_10734600_10735200	0.736617	0.0185615	0.038175	0.0493016	-4.74522	-4.04619	0.145699	1.94411	1.89576	NA	NA	NA	NA	NA	NA	NA
chr1_1074000_1074600	0.554615	0.147449	0.000621831	0.0746112	-2.46627	-6.0038	0.125351	1.67385	1.63428	NA	NA	NA	NA	NA	NA	NA
chr1_1074600_1075200	0.559931	0.000444155	0.00140201	0.0723481	-8.05843	-6.93225	0.123206	2.12943	2.03894	NA	NA	NA	NA	NA	NA	NA
chr1_10747800_10748400	0.5473	0.00072348	0.00326812	0.0729475	-7.07796	-5.80452	0.120317	1.9534	1.87043	NA	NA	NA	NA	NA	NA	NA
chr1_107479200_107479800	0.366182	0.111102	0.00655469	-0.131758	-3.68692	-6.18944	0.144368	2.26958	2.17322	NA	NA	NA	NA	NA	NA	NA
chr1_107479800_107480400	0.274108	0.0100526	7.71713e-05	-0.121455	-5.04774	-7.81363	0.109729	1.88002	1.80014	NA	NA	NA	NA	NA	NA	NA
chr1_107480400_107481000	0.26745	0.0121754	0.00784339	-0.139707	-4.42604	-4.60131	0.124454	1.69575	1.65501	NA	NA	NA	NA	NA	NA	NA
chr1_107481000_107481600	0.612672	0.0680061	0.0641554	-0.0766696	-3.57133	-3.53576	0.15041	1.9109	1.86416	NA	NA	NA	NA	NA	NA	NA
chr1_107491200_107491800	0.454922	0.00945618	0.364403	0.117735	-5.3245	-1.75628	0.156227	1.96578	1.91717	NA	NA	NA	NA	NA	NA	NA
chr1_1075200_1075800	0.637605	0.000788517	0.0019889	0.0565394	-7.02193	-6.13314	0.119233	1.95342	1.87044	NA	NA	NA	NA	NA	NA	NA
chr1_10752600_10753200	0.635193	0.108379	0.000269898	0.0580833	-3.26619	-7.70212	0.121614	1.9948	1.95204	NA	NA	NA	NA	NA	NA	NA
chr1_10753200_10753800	0.292019	0.210635	4.6685e-05	0.123242	-2.31473	-7.97829	0.11562	1.82329	1.7747	NA	NA	NA	NA	NA	NA	NA
chr1_10755000_10755600	0.497437	0.0171732	0.0004486	-0.0809141	-4.92783	-7.36981	0.118304	1.99304	1.94914	NA	NA	NA	NA	NA	NA	NA
chr1_10755600_10756200	0.0252039	0.0270959	0.000979291	-0.277248	-3.9957	-6.00832	0.119829	1.75018	1.70597	NA	NA	NA	NA	NA	NA	NA
chr1_10756200_10756800	0.104676	0.00536917	0.187423	-0.214918	-4.31324	-1.89789	0.129839	1.47591	1.4183	NA	NA	NA	NA	NA	NA	NA
chr1_10756800_10757400	0.0939308	0.000999862	0.0351906	-0.200288	-5.45264	-3.28304	0.117101	1.55128	1.51279	NA	NA	NA	NA	NA	NA	NA
chr1_10760400_10761000	0.951835	0.113838	0.000402164	0.00732984	-3.07678	-7.13771	0.12069	1.90888	1.87012	NA	NA	NA	NA	NA	NA	NA
chr1_10764600_10765200	0.39084	0.0345735	0.000429588	-0.104552	-4.54091	-7.61199	0.120693	2.08496	2.00569	NA	NA	NA	NA	NA	NA	NA
chr1_10765200_10765800	0.316589	0.0524258	0.00144291	-0.126281	-3.76734	-6.24873	0.124721	1.89208	1.84325	NA	NA	NA	NA	NA	NA	NA
chr1_10766400_10767000	0.315665	0.124462	0.000665853	0.126789	-3.10482	-7.1	0.124981	1.98405	1.94468	NA	NA	NA	NA	NA	NA	NA
chr1_10767000_10767600	0.402324	0.0557042	0.000212395	-0.0956998	-3.572	-7.17315	0.113216	1.81964	1.78332	NA	NA	NA	NA	NA	NA	NA
chr1_10774200_10774800	0.83361	0.00154767	0.0067874	-0.0246782	-5.51258	-4.52989	0.116809	1.63775	1.59788	NA	NA	NA	NA	NA	NA	NA
chr1_10774800_10775400	0.786295	0.0579569	9.55972e-05	-0.0306688	-3.07618	-6.60007	0.112459	1.58195	1.54424	NA	NA	NA	NA	NA	NA	NA
chr1_10775400_10776000	0.147128	0.0869027	0.00020667	0.167843	-2.6644	-5.98945	0.113822	1.5231	1.48582	NA	NA	NA	NA	NA	NA	NA
chr1_10785600_10786200	0.602869	0.00162633	0.158822	-0.0699367	-5.28117	-2.19231	0.133495	1.57701	1.53064	NA	NA	NA	NA	NA	NA	NA
chr1_10788000_10788600	0.16596	0.0423472	0.000500623	0.170618	-3.72624	-6.51223	0.121209	1.78447	1.73886	NA	NA	NA	NA	NA	NA	NA
chr1_10793400_10794000	0.847527	0.0175415	0.205628	0.0296678	-5.45042	-2.74242	0.153432	2.21212	2.13612	NA	NA	NA	NA	NA	NA	NA
chr1_10794600_10795200	0.520338	0.161368	0.00409875	-0.0862973	-2.2996	-4.68957	0.133217	1.61558	1.55207	NA	NA	NA	NA	NA	NA	NA
chr1_10795200_10795800	0.790644	0.582968	0.00118258	0.0342341	-0.974303	-5.87225	0.128207	1.76198	1.69814	NA	NA	NA	NA	NA	NA	NA
chr1_10795800_10796400	0.427179	0.391248	0.0419974	0.108636	-1.41321	-3.30761	0.135605	1.63281	1.58118	NA	NA	NA	NA	NA	NA	NA
chr1_107964000_107964600	0.927378	6.4106e-05	0.0479798	0.0104098	-6.99149	-3.15314	0.113589	1.5897	1.55196	NA	NA	NA	NA	NA	NA	NA
chr1_107964600_107965200	0.928541	0.000166513	0.0485023	0.0106963	-7.23076	-3.48258	0.118621	1.76374	1.71828	NA	NA	NA	NA	NA	NA	NA
chr1_107965200_107965800	0.690303	0.00412115	7.80482e-05	-0.0444051	-5.76004	-7.92187	0.110746	1.90761	1.82655	NA	NA	NA	NA	NA	NA	NA
chr1_107990400_107991000	0.665357	0.489087	0.00271727	0.061631	-1.24296	-5.5124	0.141573	1.78238	1.73939	NA	NA	NA	NA	NA	NA	NA
chr1_107991000_107991600	0.357166	0.284637	0.000831157	0.120385	-1.82476	-5.88184	0.12943	1.68557	1.64432	NA	NA	NA	NA	NA	NA	NA
chr1_107991600_107992200	0.769531	0.633444	0.00164824	0.0414038	-0.837417	-5.695	0.140484	1.74433	1.70294	NA	NA	NA	NA	NA	NA	NA
chr1_10799400_10800000	0.221903	0.0070796	0.0013934	0.147064	-5.4373	-6.41808	0.118767	1.92877	1.88654	NA	NA	NA	NA	NA	NA	NA
chr1_10800000_10800600	0.147607	0.165063	2.20691e-05	0.166191	-2.62558	-8.55834	0.112839	1.86121	1.81181	NA	NA	NA	NA	NA	NA	NA
chr1_10800600_10801200	0.274557	0.088484	0.000128579	0.130219	-3.46105	-8.14455	0.117759	1.98872	1.9479	NA	NA	NA	NA	NA	NA	NA
chr1_108015600_108016200	0.0614653	0.0866123	0.037978	0.25986	-2.63339	-3.09876	0.135559	1.50395	1.4503	NA	NA	NA	NA	NA	NA	NA
chr1_108016200_108016800	0.016639	0.300905	0.60195	0.228492	0.760547	0.374023	0.0919363	0.726917	0.712123	0.236251	0.166766	0.386523	1.01761	0.379835	0.708071	0.126474
chr1_108016800_108017400	0.137341	0.936261	0.0277681	0.181407	0.100675	-2.76051	0.119968	1.25204	1.2147	0.621027	0.0129253	2.86119	1.74445	1.64016	0.116605	0.0275638
chr1_108051600_108052200	0.1472	0.0174075	0.091141	0.208153	-4.41698	-3.01357	0.141184	1.79042	1.74645	NA	NA	NA	NA	NA	NA	NA
chr1_1080600_1081200	0.637769	0.266147	0.000971439	0.0597337	-2.18944	-6.71803	0.126031	1.94503	1.90601	NA	NA	NA	NA	NA	NA	NA
chr1_108070200_108070800	0.203938	0.000162777	0.548231	0.169971	-6.65976	-0.957365	0.131892	1.62162	1.58274	NA	NA	NA	NA	NA	NA	NA
chr1_108070800_108071400	0.138046	8.94283e-05	0.350538	0.200179	-7.21958	-1.54739	0.132626	1.68102	1.64069	NA	NA	NA	NA	NA	NA	NA
chr1_108079200_108079800	0.0332031	0.699651	0.0295076	0.323631	0.588063	-3.26903	0.147402	1.51481	1.45511	0.51913	0.0132262	3.8571	2.10047	1.8363	0.0812248	0.0211878
chr1_108079800_108080400	0.0285424	0.677615	0.0319343	0.335204	0.636312	-3.23236	0.148265	1.52089	1.46096	0.507008	0.0136159	3.86867	2.10891	1.83444	0.0815101	0.0212401
chr1_108099600_108100200	0.00143353	0.608651	0.0158841	-0.479308	-0.961864	-4.54672	0.141293	1.86578	1.81571	NA	NA	NA	NA	NA	NA	NA
chr1_108100200_108100800	0.811157	0.249127	0.0217978	-0.0377794	-2.48353	-4.83825	0.157211	2.12769	2.03757	NA	NA	NA	NA	NA	NA	NA
chr1_108120600_108121200	0.281596	0.00303044	0.000875128	0.118209	-4.91984	-5.46135	0.108496	1.57167	1.53418	NA	NA	NA	NA	NA	NA	NA
chr1_108121200_108121800	0.548037	0.000829722	0.00668002	0.0639008	-5.26259	-4.01188	0.105591	1.47096	1.41217	NA	NA	NA	NA	NA	NA	NA
chr1_108126000_108126600	0.132611	0.00023059	0.000855894	0.161318	-7.88408	-6.77484	0.105366	1.97293	1.89918	NA	NA	NA	NA	NA	NA	NA
chr1_108126600_108127200	0.235028	0.000760764	0.000662483	0.127471	-6.99035	-6.93861	0.105938	1.93818	1.8996	NA	NA	NA	NA	NA	NA	NA
chr1_10815000_10815600	0.261966	0.0250682	0.00120812	0.150976	-5.14232	-7.33649	0.132938	2.22037	2.12604	NA	NA	NA	NA	NA	NA	NA
chr1_10816800_10817400	0.800311	0.0801488	0.00026212	-0.0295431	-3.29203	-7.10249	0.116123	1.83984	1.79579	NA	NA	NA	NA	NA	NA	NA
chr1_10817400_10818000	0.770895	0.366508	0.0059314	0.0394875	-1.79879	-5.55613	0.134803	1.9723	1.92558	NA	NA	NA	NA	NA	NA	NA
chr1_1081800_1082400	0.718122	0.0925083	0.00137618	0.0477271	-3.25146	-6.28688	0.131409	1.89251	1.84566	NA	NA	NA	NA	NA	NA	NA
chr1_10819800_10820400	0.419409	0.123391	0.000207352	0.0947831	-2.95445	-7.40983	0.116333	1.88246	1.83866	NA	NA	NA	NA	NA	NA	NA
chr1_108200400_108201000	0.841072	0.116927	0.0012717	0.0251361	-2.64231	-5.53764	0.124646	1.65369	1.61292	NA	NA	NA	NA	NA	NA	NA
chr1_108201000_108201600	0.572421	0.0391674	0.000889377	0.0683115	-3.78128	-6.16814	0.120149	1.78113	1.73537	NA	NA	NA	NA	NA	NA	NA
chr1_10820400_10821000	0.438992	0.113933	0.00414712	0.102414	-3.03049	-5.52756	0.131186	1.88066	1.832	NA	NA	NA	NA	NA	NA	NA
chr1_1082400_1083000	0.449005	0.00956338	0.0207654	0.100444	-4.7389	-4.09771	0.13154	1.75239	1.71119	NA	NA	NA	NA	NA	NA	NA
chr1_10827000_10827600	0.221014	0.00456614	3.22518e-05	-0.129676	-5.49197	-8.1267	0.104521	1.84166	1.76339	NA	NA	NA	NA	NA	NA	NA
chr1_10827600_10828200	0.182342	0.00431348	1.56772e-05	-0.135714	-5.7305	-8.86481	0.10023	1.90833	1.83662	NA	NA	NA	NA	NA	NA	NA
chr1_10828200_10828800	0.539107	0.0300662	7.33552e-05	-0.0698051	-4.35628	-8.30658	0.112809	1.94605	1.9068	NA	NA	NA	NA	NA	NA	NA
chr1_1083000_1083600	0.684893	0.408836	0.000244661	-0.050417	-1.24915	-5.78126	0.123458	1.49858	1.45361	NA	NA	NA	NA	NA	NA	NA
chr1_10830000_10830600	0.375649	0.0573341	0.000968303	0.118611	-4.25675	-7.38117	0.132584	2.18341	2.0935	NA	NA	NA	NA	NA	NA	NA
chr1_10830600_10831200	0.548075	0.647157	0.00178169	0.0869331	-0.951632	-6.67129	0.143664	2.06545	2.01108	NA	NA	NA	NA	NA	NA	NA
chr1_1083600_1084200	0.0787815	0.483935	2.05244e-07	-0.175519	-0.987464	-8.33209	0.0976333	1.39928	1.36606	NA	NA	NA	NA	NA	NA	NA
chr1_10837800_10838400	0.492111	0.00595674	3.02646e-05	0.073079	-5.37015	-8.2591	0.105531	1.86215	1.78463	NA	NA	NA	NA	NA	NA	NA
chr1_10838400_10839000	0.728394	0.0343022	1.53465e-05	-0.0358101	-3.88855	-8.44352	0.102495	1.78261	1.74702	NA	NA	NA	NA	NA	NA	NA
chr1_1084200_1084800	0.644203	0.876874	1.1524e-06	-0.0461713	0.203369	-7.01949	0.0993167	1.30534	1.25387	0.599486	0.00106701	7.22286	1.81	3.99052	0.000719291	0.0012282
chr1_1084800_1085400	0.836953	0.289575	0.95884	-0.0174129	0.711282	-0.0339275	0.0841359	0.663879	0.653823	0.22719	0.278106	0.74521	0.931783	0.799768	0.433242	0.0809731
chr1_10851600_10852200	0.00631319	0.059744	0.177513	-0.450192	-3.76233	-2.6035	0.157293	1.94907	1.90116	NA	NA	NA	NA	NA	NA	NA
chr1_1085400_1086000	0.509996	0.341168	0.928587	-0.0592828	0.684432	-0.0630955	0.0892798	0.711602	0.70017	0.268479	0.269798	0.747527	0.998306	0.748796	0.462697	0.0856329
chr1_108558600_108559200	0.545418	0.0863486	0.000778307	0.0729701	-3.34033	-6.56992	0.119789	1.90603	1.82546	NA	NA	NA	NA	NA	NA	NA
chr1_108559200_108559800	0.154382	0.169906	0.0830951	0.221871	-2.42879	-3.00674	0.15322	1.74187	1.69725	NA	NA	NA	NA	NA	NA	NA
chr1_10856400_10857000	0.223713	0.791059	0.0129375	0.171178	-0.422838	-3.95516	0.138793	1.58675	1.5294	NA	NA	NA	NA	NA	NA	NA
chr1_10857000_10857600	0.470925	0.176954	0.000255338	0.083671	-2	-5.63267	0.115095	1.45854	1.42114	NA	NA	NA	NA	NA	NA	NA
chr1_10857600_10858200	0.23723	0.00017604	0.0102801	-0.134962	-7.60248	-4.79292	0.1127	1.86242	1.7909	NA	NA	NA	NA	NA	NA	NA
chr1_10860000_10860600	0.0871527	0.0139521	0.0246543	-0.238917	-4.71799	-4.18074	0.136689	1.84578	1.79972	NA	NA	NA	NA	NA	NA	NA
chr1_10860600_10861200	0.196276	0.000510387	0.0241265	-0.155753	-5.87616	-3.5474	0.118781	1.57168	1.52112	NA	NA	NA	NA	NA	NA	NA
chr1_10861200_10861800	0.113259	0.00948367	0.00631279	-0.197455	-4.41263	-4.55266	0.122302	1.62979	1.59064	NA	NA	NA	NA	NA	NA	NA
chr1_108646200_108646800	0.388572	0.315258	0.000353923	0.0875742	-1.27893	-4.68225	0.100608	1.25962	1.21358	NA	NA	NA	NA	NA	NA	NA
chr1_108646800_108647400	0.200108	0.0518909	0.00385806	0.153981	-2.95886	-4.33274	0.118456	1.48252	1.42362	NA	NA	NA	NA	NA	NA	NA
chr1_1086600_1087200	0.105165	0.127608	1.17333e-05	-0.178386	-2.60884	-8.05056	0.107925	1.68138	1.63843	NA	NA	NA	NA	NA	NA	NA
chr1_108660600_108661200	0.0747759	0.329996	0.185157	-0.266072	-1.61568	-2.15616	0.145938	1.64104	1.60287	NA	NA	NA	NA	NA	NA	NA
chr1_108661200_108661800	0.384407	0.967364	0.0190672	0.117786	0.0577547	-3.27569	0.134125	1.40391	1.34813	0.630224	0.0114938	3.33345	1.94639	1.71263	0.102242	0.0249894
chr1_108661800_108662400	0.149168	0.152848	0.000944261	0.1929	-3.02279	-7.19829	0.13149	2.07954	2.03674	NA	NA	NA	NA	NA	NA	NA
chr1_108681600_108682200	0.9199	0.012339	0.00207077	0.0121338	-4.94804	-6.03661	0.120002	1.89958	1.84895	NA	NA	NA	NA	NA	NA	NA
chr1_108682200_108682800	0.706148	0.0111222	0.00165814	0.0444093	-4.88113	-6.00197	0.117056	1.84502	1.79584	NA	NA	NA	NA	NA	NA	NA
chr1_10869000_10869600	0.0446524	0.349548	0.00704692	0.292967	-2.02813	-5.92734	0.14192	2.14596	2.1013	NA	NA	NA	NA	NA	NA	NA
chr1_108691200_108691800	0.925928	0.00120083	0.00342931	-0.0105693	-5.9902	-5.21987	0.113065	1.73486	1.69147	NA	NA	NA	NA	NA	NA	NA
chr1_108691800_108692400	0.548436	0.000120931	0.34392	-0.0607213	-5.30328	-1.16906	0.100438	1.26255	1.22249	NA	NA	NA	NA	NA	NA	NA
chr1_108692400_108693000	0.544127	0.00045807	0.367731	-0.0685319	-5.05464	-1.1745	0.112142	1.33925	1.29111	NA	NA	NA	NA	NA	NA	NA
chr1_108693000_108693600	0.0946039	0.0023589	0.136044	0.220084	-4.8966	-2.25037	0.128947	1.52108	1.48319	NA	NA	NA	NA	NA	NA	NA
chr1_108712200_108712800	0.0346713	0.00874732	3.04716e-05	0.232292	-5.17451	-8.369	0.106718	1.88949	1.80919	NA	NA	NA	NA	NA	NA	NA
chr1_108712800_108713400	0.0228374	0.00851223	1.90856e-05	0.24504	-5.23868	-8.699	0.104046	1.90566	1.82465	NA	NA	NA	NA	NA	NA	NA
chr1_108719400_108720000	0.851073	0.1063	0.016081	-0.024794	-3.06621	-4.52939	0.131318	1.8613	1.81239	NA	NA	NA	NA	NA	NA	NA
chr1_1087200_1087800	0.54619	0.214486	4.84698e-06	-0.0617739	-1.77441	-7.09243	0.101605	1.40971	1.37012	NA	NA	NA	NA	NA	NA	NA
chr1_108720000_108720600	0.752333	0.110926	0.0124667	-0.0413869	-2.9921	-4.66267	0.13037	1.84094	1.79282	NA	NA	NA	NA	NA	NA	NA
chr1_10873800_10874400	0.903387	0.197552	0.000827969	-0.0157004	-2.64613	-7.09641	0.128634	2.02387	1.98315	NA	NA	NA	NA	NA	NA	NA
chr1_108741600_108742200	0.0406585	0.238279	0.00147353	0.270535	-2.40157	-6.60045	0.128438	2.00998	1.95116	NA	NA	NA	NA	NA	NA	NA
chr1_108742200_108742800	0.746777	0.152667	0.000747438	0.039624	-2.81132	-6.77929	0.121982	1.93319	1.8766	NA	NA	NA	NA	NA	NA	NA
chr1_10874400_10875000	0.745545	0.0565564	8.11981e-05	-0.0373364	-3.70986	-7.99816	0.114362	1.89669	1.84938	NA	NA	NA	NA	NA	NA	NA
chr1_108745800_108746400	0.620207	0.0179727	0.00180132	-0.060386	-4.2551	-5.60118	0.121031	1.73395	1.69043	NA	NA	NA	NA	NA	NA	NA
chr1_108746400_108747000	0.437088	0.00549643	0.0138433	-0.101119	-5.22218	-4.47245	0.128987	1.79226	1.74759	NA	NA	NA	NA	NA	NA	NA
chr1_108747000_108747600	0.995442	0.0202136	0.0566013	-0.00078486	-4.90528	-3.90089	0.136652	2.03896	1.99473	NA	NA	NA	NA	NA	NA	NA
chr1_10875000_10875600	0.0910874	0.147937	5.09513e-05	-0.202095	-2.71946	-8.04421	0.1171	1.84797	1.80011	NA	NA	NA	NA	NA	NA	NA
chr1_10875600_10876200	0.0754135	0.039517	0.000908876	-0.2309	-4.4024	-7.05835	0.126934	2.07756	1.98991	NA	NA	NA	NA	NA	NA	NA
chr1_1087800_1088400	0.842455	0.000751822	0.00612422	0.0227066	-6.49043	-5.03162	0.113601	1.79761	1.75105	NA	NA	NA	NA	NA	NA	NA
chr1_108830400_108831000	0.972443	0.0136004	0.0021222	0.00403714	-4.43928	-5.4861	0.116235	1.72986	1.68477	NA	NA	NA	NA	NA	NA	NA
chr1_1088400_1089000	0.198426	0.105366	0.00411913	-0.161269	-2.42346	-4.25505	0.12359	1.46708	1.4091	NA	NA	NA	NA	NA	NA	NA
chr1_108857400_108858000	0.0251109	0.00357126	6.81919e-06	0.225512	-5.69731	-9.0455	0.0974026	1.85496	1.78225	NA	NA	NA	NA	NA	NA	NA
chr1_108875400_108876000	0.0579838	0.191124	0.00101442	0.255694	-2.76699	-7.15612	0.131507	2.08547	2.03875	NA	NA	NA	NA	NA	NA	NA
chr1_108876000_108876600	0.207098	0.00349172	0.71301	0.175819	-4.32333	0.499557	0.137401	1.4039	1.34981	0.00724115	0.203125	-4.82289	1.94754	-2.4764	0.0223294	0.00887373
chr1_108876600_108877200	0.110848	0.0218161	0.401643	0.251366	-3.64306	1.25277	0.154622	1.53445	1.4799	0.022246	0.103653	-4.89583	2.13182	-2.29655	0.0325796	0.0113556
chr1_108877200_108877800	0.829145	0.00318645	0.0506648	-0.0277172	-4.81848	-3.02744	0.127712	1.54817	1.50858	NA	NA	NA	NA	NA	NA	NA
chr1_1089000_1089600	0.307397	0.0228866	0.959673	-0.136458	-3.24837	-0.0680572	0.132207	1.37982	1.33864	NA	NA	NA	NA	NA	NA	NA
chr1_108953400_108954000	0.0039044	0.0124382	0.0799674	0.406994	-5.13004	-3.45907	0.133917	1.97184	1.93199	NA	NA	NA	NA	NA	NA	NA
chr1_1089600_1090200	0.328788	0.898993	0.180899	-0.103675	-0.132931	-1.38447	0.105037	1.04148	1.01905	NA	NA	NA	NA	NA	NA	NA
chr1_108963000_108963600	0.2093	0.28368	0.763278	0.16585	-1.37533	-0.374119	0.13025	1.26787	1.23484	NA	NA	NA	NA	NA	NA	NA
chr1_108963600_108964200	0.31433	0.0105048	0.417338	0.130765	-3.76708	-1.11665	0.128542	1.41203	1.3644	NA	NA	NA	NA	NA	NA	NA
chr1_10899600_10900200	0.338185	0.000154125	0.58112	0.128019	-6.29494	-0.823751	0.132273	1.52637	1.48241	NA	NA	NA	NA	NA	NA	NA
chr1_10900200_10900800	0.778282	0.000927054	0.35298	0.0362237	-4.64447	1.19297	0.127902	1.31184	1.27139	0.00435345	0.0894384	-5.83744	1.82685	-3.19536	0.00454405	0.00340409
chr1_10900800_10901400	0.109632	0.0372099	0.826268	0.222404	-3.00088	-0.29818	0.136327	1.39858	1.35079	NA	NA	NA	NA	NA	NA	NA
chr1_10901400_10902000	0.018365	0.205556	1.94437e-05	0.266427	-2.13503	-7.71188	0.10896	1.66275	1.6195	NA	NA	NA	NA	NA	NA	NA
chr1_1090200_1090800	0.0314993	0.287134	0.00116538	-0.117337	-0.616891	-1.95285	0.052892	0.572834	0.563914	NA	NA	NA	NA	NA	NA	NA
chr1_10902000_10902600	0.877185	0.593633	1.11224e-06	0.0169486	0.755326	-7.6989	0.109064	1.40572	1.37269	0.455121	0.00106571	8.45423	1.96477	4.30291	0.000346503	0.000782823
chr1_10902600_10903200	0.0990254	0.0825021	7.61882e-05	-0.189416	-3.1345	-7.46777	0.112504	1.76585	1.71888	NA	NA	NA	NA	NA	NA	NA
chr1_109041000_109041600	0.853794	0.00346281	0.000372876	-0.0221493	-6.04795	-7.21657	0.11952	1.96202	1.87868	NA	NA	NA	NA	NA	NA	NA
chr1_10906800_10907400	0.936962	0.00469279	0.000208046	0.00840833	-5.10099	-6.73964	0.105735	1.71632	1.6728	NA	NA	NA	NA	NA	NA	NA
chr1_10907400_10908000	0.68097	0.0423437	6.10232e-05	-0.0449608	-3.36286	-6.93356	0.108663	1.61042	1.5711	NA	NA	NA	NA	NA	NA	NA
chr1_109075200_109075800	0.372352	0.000689747	0.012217	-0.0976829	-5.10905	-3.57591	0.108433	1.40386	1.37075	NA	NA	NA	NA	NA	NA	NA
chr1_109075800_109076400	0.495583	0.000282502	0.0104559	-0.074363	-5.61075	-3.72077	0.108256	1.42731	1.39372	NA	NA	NA	NA	NA	NA	NA
chr1_109076400_109077000	0.450005	0.00161375	0.00300485	-0.089336	-6.53929	-5.88346	0.117254	1.95114	1.87768	NA	NA	NA	NA	NA	NA	NA
chr1_1090800_1091400	0.0235842	0.265251	0.00267473	-0.126214	-0.64659	-1.79133	0.0538997	0.573321	0.56424	NA	NA	NA	NA	NA	NA	NA
chr1_10908000_10908600	0.298911	0.0961113	0.00119662	-0.132291	-3.39091	-6.69139	0.125915	1.99607	1.93727	NA	NA	NA	NA	NA	NA	NA
chr1_10908600_10909200	0.776797	0.145981	0.0269023	0.0415953	-3.1236	-4.69975	0.145864	2.11211	2.05582	NA	NA	NA	NA	NA	NA	NA
chr1_109089000_109089600	0.144895	0.0230071	0.00235036	0.180054	-4.45035	-5.95166	0.121413	1.89215	1.84809	NA	NA	NA	NA	NA	NA	NA
chr1_109090200_109090800	0.176442	1.61747e-05	0.00103198	-0.129232	-7.79607	-5.52185	0.0941316	1.61834	1.57576	NA	NA	NA	NA	NA	NA	NA
chr1_109090800_109091400	0.732508	0.00100262	0.00200229	-0.0363	-5.17041	-4.70297	0.105562	1.47137	1.43531	NA	NA	NA	NA	NA	NA	NA
chr1_109091400_109092000	0.461879	0.0479038	0.00931754	0.103841	-4.36311	-5.67444	0.139954	2.14674	2.09058	NA	NA	NA	NA	NA	NA	NA
chr1_10909200_10909800	0.295306	0.00385901	0.0062403	0.126288	-5.41766	-4.97161	0.119297	1.78015	1.7344	NA	NA	NA	NA	NA	NA	NA
chr1_10909800_10910400	0.892992	0.00586182	0.0015403	-0.0157455	-5.32207	-6.0401	0.116405	1.84166	1.7936	NA	NA	NA	NA	NA	NA	NA
chr1_109099800_109100400	0.242714	0.00437345	0.188234	-0.163274	-4.78722	-2.06693	0.137966	1.59689	1.54751	NA	NA	NA	NA	NA	NA	NA
chr1_10910400_10911000	0.505323	0.134559	0.000208566	-0.0821063	-3.03528	-7.86205	0.122291	1.99274	1.95177	NA	NA	NA	NA	NA	NA	NA
chr1_10911000_10911600	0.839083	0.102251	0.00284915	0.0282453	-3.41719	-6.29558	0.138309	2.04956	1.99712	NA	NA	NA	NA	NA	NA	NA
chr1_109112400_109113000	0.493966	0.0159803	2.34638e-05	-0.0714602	-4.48826	-8.2302	0.103639	1.79411	1.74921	NA	NA	NA	NA	NA	NA	NA
chr1_109113000_109113600	0.281393	0.253213	0.000874827	-0.143893	-2.12353	-6.36832	0.132013	1.83525	1.78891	NA	NA	NA	NA	NA	NA	NA
chr1_109113600_109114200	0.000185014	0.0247274	0.00100266	-0.481859	-4.33192	-6.38165	0.118502	1.8658	1.81607	NA	NA	NA	NA	NA	NA	NA
chr1_10911600_10912200	0.694327	0.0687033	0.00164724	0.0500715	-3.5099	-6.13493	0.126614	1.88296	1.83437	NA	NA	NA	NA	NA	NA	NA
chr1_109136400_109137000	0.142448	0.0568108	0.0217846	0.206161	-3.33757	-3.96204	0.138151	1.70818	1.66838	NA	NA	NA	NA	NA	NA	NA
chr1_1091400_1092000	0.64784	0.212274	0.00189845	-0.0652075	-2.41161	-6.12879	0.141824	1.90655	1.85991	NA	NA	NA	NA	NA	NA	NA
chr1_109185000_109185600	0.341498	0.049427	0.000447333	0.113265	-3.47169	-6.34132	0.117843	1.72023	1.67672	NA	NA	NA	NA	NA	NA	NA
chr1_109185600_109186200	0.941355	0.11602	0.00153916	0.00910627	-2.73437	-5.60324	0.123107	1.70695	1.66375	NA	NA	NA	NA	NA	NA	NA
chr1_109186200_109186800	0.493154	0.123952	0.000326953	0.0834852	-3.07825	-7.4432	0.120851	1.96434	1.91643	NA	NA	NA	NA	NA	NA	NA
chr1_109191000_109191600	0.331536	0.0430252	0.000249589	0.11253	-3.73526	-6.93825	0.114664	1.79492	1.74733	NA	NA	NA	NA	NA	NA	NA
chr1_109191600_109192200	0.376961	0.155749	0.00031191	0.106418	-2.74206	-7.25084	0.119285	1.90004	1.85962	NA	NA	NA	NA	NA	NA	NA
chr1_109197000_109197600	0.344115	0.0356326	0.0209824	-0.122421	-3.55421	-3.82771	0.128068	1.64188	1.60132	NA	NA	NA	NA	NA	NA	NA
chr1_109197600_109198200	0.583839	0.465259	0.482051	-0.0680187	0.752762	0.708149	0.123294	1.0223	0.999142	0.365408	0.128382	0.0446134	1.42947	0.0312098	0.975412	0.169236
chr1_109198200_109198800	0.834054	0.208342	0.224181	-0.0301463	1.4491	1.36752	0.143079	1.13562	1.10994	0.162043	0.0547343	0.0815806	1.58795	0.0513747	0.959537	0.166881
chr1_1092000_1092600	0.586166	0.285505	0.0263369	-0.0678321	1.34543	-2.7784	0.123723	1.24507	1.21058	0.223917	0.012703	4.12382	1.73658	2.37468	0.027683	0.0102338
chr1_109207800_109208400	0.997026	0.0105507	5.46696e-05	-0.00040469	-4.92922	-7.87245	0.107968	1.84881	1.77026	NA	NA	NA	NA	NA	NA	NA
chr1_109208400_109209000	0.526237	0.0121737	5.04617e-05	0.0695541	-4.97132	-8.16252	0.108913	1.90463	1.82538	NA	NA	NA	NA	NA	NA	NA
chr1_109213200_109213800	0.0611168	0.17362	0.0240536	0.280131	-2.71154	-4.46177	0.145929	1.96193	1.91216	NA	NA	NA	NA	NA	NA	NA
chr1_109213800_109214400	0.803108	0.0203834	0.19704	-0.0317954	-3.4184	-1.79218	0.126791	1.42296	1.36914	NA	NA	NA	NA	NA	NA	NA
chr1_109214400_109215000	0.376703	0.1828	0.00130964	-0.0949816	0.953423	2.36838	0.106407	0.704893	0.691849	0.142454	0.00632874	-1.41495	0.987689	-1.43259	0.167421	0.036631
chr1_109239000_109239600	0.443899	0.0659378	0.0191225	-0.106199	-3.77486	-4.73788	0.137514	2.00399	1.95086	NA	NA	NA	NA	NA	NA	NA
chr1_109240200_109240800	0.910469	0.0142266	0.0013493	-0.0129518	-4.61847	-6.03183	0.11455	1.81236	1.76729	NA	NA	NA	NA	NA	NA	NA
chr1_109240800_109241400	0.721391	0.0122906	0.000744851	0.0402611	-4.71583	-6.36724	0.112213	1.80936	1.76197	NA	NA	NA	NA	NA	NA	NA
chr1_109248000_109248600	0.842549	0.11556	0.00188933	0.0267791	-3.41737	-6.80935	0.134057	2.13055	2.0654	NA	NA	NA	NA	NA	NA	NA
chr1_109248600_109249200	0.609253	0.361869	0.0067428	0.0683623	-1.3949	-4.12735	0.13283	1.5146	1.45461	NA	NA	NA	NA	NA	NA	NA
chr1_109249200_109249800	0.773111	0.720785	0.0168572	0.0409379	-0.550949	-3.6511	0.14116	1.53208	1.47218	NA	NA	NA	NA	NA	NA	NA
chr1_109249800_109250400	0.56133	0.0142886	0.0268115	-0.0798024	-5.17943	-4.529	0.136388	2.03387	1.97988	NA	NA	NA	NA	NA	NA	NA
chr1_109252800_109253400	0.77464	0.142578	0.000139389	0.0338966	-2.46455	-6.69374	0.117697	1.65207	1.61069	NA	NA	NA	NA	NA	NA	NA
chr1_109253400_109254000	0.763423	0.0764471	0.00109533	0.036676	-3.19506	-5.98263	0.121131	1.76286	1.71713	NA	NA	NA	NA	NA	NA	NA
chr1_109257600_109258200	0.542541	0.0290263	0.000468542	0.074718	-4.54218	-7.37841	0.121782	2.01549	1.95878	NA	NA	NA	NA	NA	NA	NA
chr1_1092600_1093200	0.498458	0.566976	0.0159495	0.0592696	-0.544098	-2.30953	0.0868649	0.943525	0.92291	NA	NA	NA	NA	NA	NA	NA
chr1_109263000_109263600	0.717019	0.0614372	0.00129657	0.0446202	-3.40823	-5.93563	0.122354	1.77774	1.73218	NA	NA	NA	NA	NA	NA	NA
chr1_109263600_109264200	0.0984472	0.0469624	0.00575968	0.217365	-3.87294	-5.34986	0.128876	1.89714	1.84709	NA	NA	NA	NA	NA	NA	NA
chr1_109268400_109269000	0.122085	0.664653	0.00165118	-0.204242	-0.688739	-5.15428	0.129669	1.57856	1.54153	NA	NA	NA	NA	NA	NA	NA
chr1_109269000_109269600	0.0448644	0.156228	0.000353426	-0.238573	-2.08282	-5.40306	0.11569	1.44494	1.40024	NA	NA	NA	NA	NA	NA	NA
chr1_109269600_109270200	0.543501	0.0203632	0.000527659	-0.0678296	-3.69097	-5.58719	0.110819	1.53615	1.49877	NA	NA	NA	NA	NA	NA	NA
chr1_109270200_109270800	0.700583	0.215726	0.0136655	0.0404759	-1.57172	-3.11673	0.104604	1.25212	1.2154	NA	NA	NA	NA	NA	NA	NA
chr1_109270800_109271400	0.689987	0.861917	0.00338606	0.0398365	0.195486	-3.36389	0.0992449	1.11763	1.08844	0.593989	0.00792873	3.55937	1.56006	2.28156	0.0336059	0.0115892
chr1_109271400_109272000	0.542654	0.862496	0.000106344	0.0749273	-0.249723	-5.87944	0.122158	1.43379	1.38643	NA	NA	NA	NA	NA	NA	NA
chr1_109273800_109274400	0.506561	0.12036	0.000522344	-0.080812	-2.53482	-5.83666	0.120716	1.60167	1.5643	NA	NA	NA	NA	NA	NA	NA
chr1_109274400_109275000	0.44336	0.234028	0.669805	-0.0911408	1.19662	-0.417071	0.117875	0.992324	0.971818	0.182291	0.189028	1.61369	1.38893	1.16182	0.258986	0.0525718
chr1_109275000_109275600	0.530355	0.0312832	0.391304	-0.0859537	2.20982	0.843408	0.13595	0.994782	0.974576	0.0291011	0.100615	1.36641	1.39262	0.981179	0.338225	0.0655027
chr1_109280400_109281000	0.66934	0.00895192	1.90402e-05	0.0441218	-5.03418	-8.46967	0.102654	1.84423	1.77628	NA	NA	NA	NA	NA	NA	NA
chr1_109281000_109281600	0.897029	0.00598154	5.2039e-05	-0.0133543	-5.20801	-7.88504	0.10262	1.8069	1.76706	NA	NA	NA	NA	NA	NA	NA
chr1_109282200_109282800	0.223233	0.0197464	0.000905041	-0.126097	-3.27155	-4.6153	0.102132	1.35444	1.30064	NA	NA	NA	NA	NA	NA	NA
chr1_109282800_109283400	0.0432991	0.0201675	0.192029	-0.141164	-1.71282	-0.923404	0.0679271	0.711681	0.697414	NA	NA	NA	NA	NA	NA	NA
chr1_109283400_109284000	0.187162	5.09485e-05	0.499864	-0.121567	-5.15128	-0.763906	0.0907925	1.15274	1.12327	NA	NA	NA	NA	NA	NA	NA
chr1_109294200_109294800	0.612443	0.00160235	0.0975128	0.0651959	-5.69722	-2.80087	0.127818	1.69865	1.65589	NA	NA	NA	NA	NA	NA	NA
chr1_109294800_109295400	0.964778	0.135208	0.0152361	-0.00646607	-2.77556	-4.49191	0.145633	1.82533	1.78189	NA	NA	NA	NA	NA	NA	NA
chr1_109295400_109296000	0.578401	0.0608015	0.00403459	0.073829	-3.61415	-5.54663	0.131909	1.88034	1.83225	NA	NA	NA	NA	NA	NA	NA
chr1_109297200_109297800	0.867956	0.101751	0.000466065	0.0197831	-3.02528	-6.66102	0.118329	1.81177	1.76752	NA	NA	NA	NA	NA	NA	NA
chr1_109297800_109298400	0.869358	0.111786	6.07683e-05	-0.0184294	-2.45148	-6.51708	0.111426	1.51205	1.47629	NA	NA	NA	NA	NA	NA	NA
chr1_109299000_109299600	0.874026	0.0797217	0.0021955	-0.0222319	-4.06829	-7.05322	0.139444	2.27034	2.17397	NA	NA	NA	NA	NA	NA	NA
chr1_109300200_109300800	0.0318729	0.0498808	0.00637237	-0.297237	-3.88091	-5.36875	0.134294	1.92699	1.87808	NA	NA	NA	NA	NA	NA	NA
chr1_109306200_109306800	0.377016	0.0811415	0.0172799	-0.121722	-3.58906	-4.83887	0.136454	2.01265	1.95906	NA	NA	NA	NA	NA	NA	NA
chr1_109306800_109307400	0.982341	0.0551316	0.0138958	0.00309524	-3.43228	-4.34338	0.139085	1.7442	1.69815	NA	NA	NA	NA	NA	NA	NA
chr1_109307400_109308000	0.696328	0.0924531	0.00223442	0.0474	-2.56682	-4.65955	0.120692	1.49376	1.43892	NA	NA	NA	NA	NA	NA	NA
chr1_109308000_109308600	0.155641	0.0693343	5.86682e-05	0.159807	-3.44067	-8.01519	0.110704	1.85017	1.81121	NA	NA	NA	NA	NA	NA	NA
chr1_109316400_109317000	0.0194694	0.297894	0.000216453	0.293274	-1.94822	-7.25862	0.121126	1.85037	1.80728	NA	NA	NA	NA	NA	NA	NA
chr1_109317000_109317600	0.0603646	0.32813	0.000469925	0.24784	-1.94087	-7.22156	0.128717	1.96366	1.91764	NA	NA	NA	NA	NA	NA	NA
chr1_1093200_1093800	0.521961	0.0218173	0.0171727	0.0611622	-2.825	-2.86238	0.0947863	1.1899	1.15767	NA	NA	NA	NA	NA	NA	NA
chr1_10936800_10937400	0.930013	0.780273	2.18542e-05	0.0100321	-0.446736	-7.33286	0.1136	1.59206	1.55141	NA	NA	NA	NA	NA	NA	NA
chr1_10937400_10938000	0.499259	0.246704	4.95196e-05	-0.0775611	-1.7468	-6.49581	0.113886	1.48876	1.45077	NA	NA	NA	NA	NA	NA	NA
chr1_10938000_10938600	0.57844	0.598367	1.02775e-05	-0.0620592	-0.745421	-6.75955	0.110891	1.40532	1.36469	NA	NA	NA	NA	NA	NA	NA
chr1_10938600_10939200	0.272855	0.391052	0.00052889	0.142284	-1.44901	-6.08785	0.128207	1.67347	1.63341	NA	NA	NA	NA	NA	NA	NA
chr1_109389000_109389600	0.904338	1.30048e-05	0.000519958	0.0187322	4.63335	3.47283	0.155006	0.948915	0.930386	0.00252007	0.00473535	1.16052	1.32893	0.873271	0.39288	0.0743951
chr1_109389600_109390200	0.848582	4.41597e-14	1.13242e-13	0.0245931	5.69675	5.47523	0.128085	0.532062	0.526249	0.00245825	0.000772152	0.221523	0.74835	0.296015	0.77027	0.137241
chr1_109398000_109398600	0.121126	0.0450907	0.0238091	0.187525	-2.80446	-3.06205	0.118742	1.36146	1.30988	NA	NA	NA	NA	NA	NA	NA
chr1_109398600_109399200	0.0496992	0.0232765	0.00309864	0.248799	-3.67253	-4.75947	0.123434	1.56468	1.52431	NA	NA	NA	NA	NA	NA	NA
chr1_10940400_10941000	0.921654	0.875135	8.33825e-07	0.0099593	-0.204334	-7.06694	0.100709	1.29311	1.24143	NA	NA	NA	NA	NA	NA	NA
chr1_10941000_10941600	0.592072	0.614099	0.000169925	-0.0548703	-0.630377	-4.9082	0.101686	1.24167	1.1991	NA	NA	NA	NA	NA	NA	NA
chr1_109415400_109416000	0.021218	0.0463349	3.50773e-09	0.159233	-2.58027	-8.81442	0.0667445	1.26016	1.21138	NA	NA	NA	NA	NA	NA	NA
chr1_109416000_109416600	0.0398257	0.0441327	4.87475e-09	0.143492	-2.61516	-8.7207	0.067827	1.26362	1.21445	NA	NA	NA	NA	NA	NA	NA
chr1_109425600_109426200	0.0386352	0.00155817	0.694876	-0.201329	-3.59859	-0.411931	0.0945637	1.06986	1.04361	NA	NA	NA	NA	NA	NA	NA
chr1_109426200_109426800	0.0793661	0.000699851	0.475272	-0.162084	-3.9743	-0.768999	0.090342	1.09351	1.06831	NA	NA	NA	NA	NA	NA	NA
chr1_109426800_109427400	0.347962	0.000299809	0.0083535	-0.10632	-6.58277	-4.52941	0.112124	1.68277	1.64335	NA	NA	NA	NA	NA	NA	NA
chr1_109438200_109438800	0.249781	0.631298	0.0114103	-0.158222	-0.827826	-4.40289	0.135742	1.71348	1.67057	NA	NA	NA	NA	NA	NA	NA
chr1_10945800_10946400	0.864303	0.047842	0.0402592	-0.0232849	-3.15902	-3.17617	0.135489	1.55385	1.50477	NA	NA	NA	NA	NA	NA	NA
chr1_10946400_10947000	0.528967	0.131134	0.00881196	0.0827767	-2.30864	-3.95695	0.130482	1.50201	1.44638	NA	NA	NA	NA	NA	NA	NA
chr1_10947000_10947600	0.804381	0.0809849	0.00244029	-0.0328364	-3.28211	-5.75119	0.131813	1.83954	1.7932	NA	NA	NA	NA	NA	NA	NA
chr1_10947600_10948200	0.748906	0.164863	0.00125932	0.0391677	1.81318	-4.26186	0.121636	1.2847	1.24013	0.128598	0.0062428	6.07504	1.7856	3.40224	0.00282671	0.0026234
chr1_109479000_109479600	0.12721	0.238787	8.28667e-05	-0.185848	-2.17587	-7.66587	0.119649	1.82308	1.77514	NA	NA	NA	NA	NA	NA	NA
chr1_109479600_109480200	0.143159	0.273074	3.71451e-05	-0.171434	-1.91867	-7.69083	0.115089	1.72966	1.68455	NA	NA	NA	NA	NA	NA	NA
chr1_10948200_10948800	0.654342	0.587421	1.15983e-05	0.0495999	-0.748835	-6.53081	0.110058	1.37045	1.3282	NA	NA	NA	NA	NA	NA	NA
chr1_109483200_109483800	0.238731	0.0564436	0.00643221	0.168306	-4.19582	-5.96027	0.141001	2.14412	2.08757	NA	NA	NA	NA	NA	NA	NA
chr1_10948800_10949400	0.57415	0.0662563	0.000108233	-0.0642958	-3.41545	-7.50301	0.113599	1.8154	1.77158	NA	NA	NA	NA	NA	NA	NA
chr1_109489200_109489800	0.039904	0.117312	0.00225628	-0.279964	-3.28624	-6.52838	0.13239	2.05892	2.01816	NA	NA	NA	NA	NA	NA	NA
chr1_109489800_109490400	0.907818	0.0132063	0.00738638	-0.0145477	-4.14314	-4.39962	0.124947	1.60715	1.5696	NA	NA	NA	NA	NA	NA	NA
chr1_109491000_109491600	0.933916	0.288118	1.67151e-05	-0.00905953	-1.69334	-7.382	0.108662	1.57566	1.53554	NA	NA	NA	NA	NA	NA	NA
chr1_109492800_109493400	0.954064	0.269964	9.18475e-05	0.00690433	-2.04	-7.62342	0.119206	1.82698	1.77849	NA	NA	NA	NA	NA	NA	NA
chr1_109493400_109494000	0.964162	0.175855	0.00314298	-0.00528989	-1.82861	-4.00038	0.117094	1.3301	1.28329	NA	NA	NA	NA	NA	NA	NA
chr1_109494000_109494600	0.271258	0.103021	0.0364126	0.160491	-2.83828	-3.59039	0.144126	1.70627	1.66592	NA	NA	NA	NA	NA	NA	NA
chr1_109507800_109508400	0.81143	0.00398558	0.000549217	-0.0267002	-5.51447	-6.57857	0.111271	1.81895	1.77098	NA	NA	NA	NA	NA	NA	NA
chr1_109508400_109509000	0.32117	0.0112256	7.79993e-05	-0.104016	-4.1633	-6.66411	0.103718	1.57584	1.53648	NA	NA	NA	NA	NA	NA	NA
chr1_109509000_109509600	0.405701	0.0213589	0.00898099	-0.10558	-4.07768	-4.55125	0.125812	1.71117	1.66807	NA	NA	NA	NA	NA	NA	NA
chr1_109509600_109510200	0.859648	0.0504897	0.0120326	-0.0255522	-4.58096	-5.79243	0.1437	2.28089	2.21532	NA	NA	NA	NA	NA	NA	NA
chr1_109528200_109528800	0.511883	0.0317068	0.0156451	-0.0913052	-4.69482	-5.19495	0.138124	2.11899	2.06953	NA	NA	NA	NA	NA	NA	NA
chr1_109528800_109529400	0.244524	0.0183512	0.00917522	-0.155666	-5.04493	-5.4807	0.13205	2.06296	2.01479	NA	NA	NA	NA	NA	NA	NA
chr1_109531800_109532400	0.934533	0.0366532	0.00179225	-0.0100234	-3.95023	-5.92586	0.121359	1.83536	1.78748	NA	NA	NA	NA	NA	NA	NA
chr1_109532400_109533000	0.771061	0.987485	2.06614e-06	0.0318619	-0.0237786	-7.97777	0.108852	1.50769	1.46988	NA	NA	NA	NA	NA	NA	NA
chr1_109533000_109533600	0.0416252	0.571588	0.000282801	0.260673	-1.02633	-6.89344	0.124376	1.80123	1.75376	NA	NA	NA	NA	NA	NA	NA
chr1_109538400_109539000	0.200822	0.0302783	2.95005e-07	0.114193	-3.70772	-9.67991	0.087989	1.65856	1.61485	NA	NA	NA	NA	NA	NA	NA
chr1_109539000_109539600	0.343161	0.025696	2.48915e-07	0.082466	-3.91214	-9.98519	0.0860979	1.69685	1.65222	NA	NA	NA	NA	NA	NA	NA
chr1_109539600_109540200	0.310545	0.307822	1.5026e-06	0.104862	-1.66862	-8.70371	0.102267	1.61809	1.57655	NA	NA	NA	NA	NA	NA	NA
chr1_109540200_109540800	0.0455876	0.166408	4.91913e-05	0.230241	-2.52183	-7.86047	0.112043	1.79348	1.75475	NA	NA	NA	NA	NA	NA	NA
chr1_109542000_109542600	0.689652	0.0648014	0.00178335	0.0531231	-3.99554	-6.86277	0.132195	2.11188	2.06901	NA	NA	NA	NA	NA	NA	NA
chr1_109542600_109543200	0.256389	0.159857	0.016828	-0.152023	-2.10548	-3.51089	0.13228	1.47375	1.41525	NA	NA	NA	NA	NA	NA	NA
chr1_109543200_109543800	0.71345	0.0240909	0.0208568	-0.0431144	-3.39749	-3.35524	0.116683	1.45645	1.40221	NA	NA	NA	NA	NA	NA	NA
chr1_109543800_109544400	0.978599	0.166428	0.0106546	0.00298158	-1.93618	-3.54205	0.110543	1.37704	1.33043	NA	NA	NA	NA	NA	NA	NA
chr1_109544400_109545000	0.81614	0.0172475	0.00508627	0.0286669	-4.01829	-4.67324	0.122588	1.62634	1.58822	NA	NA	NA	NA	NA	NA	NA
chr1_109548000_109548600	0.119813	0.000578308	0.000571692	-0.155268	-5.02679	-4.87657	0.0979603	1.35946	1.31748	NA	NA	NA	NA	NA	NA	NA
chr1_109548600_109549200	0.0139182	4.16509e-06	0.012625	-0.247428	-6.81202	-3.29419	0.0967623	1.30466	1.26907	NA	NA	NA	NA	NA	NA	NA
chr1_10958400_10959000	0.867685	0.0301483	0.0136024	0.0222395	-3.87471	-4.33974	0.132747	1.73183	1.69111	NA	NA	NA	NA	NA	NA	NA
chr1_109598400_109599000	0.0431654	0.111323	0.000204731	0.241302	-2.52353	-6.12296	0.116035	1.55442	1.51781	NA	NA	NA	NA	NA	NA	NA
chr1_109599000_109599600	0.0548147	0.0113507	0.00117536	0.23378	-4.66848	-5.96968	0.11864	1.76996	1.72527	NA	NA	NA	NA	NA	NA	NA
chr1_109619400_109620000	0.924702	0.0238678	0.145471	-0.012508	-3.37065	-2.05098	0.131619	1.44253	1.38504	NA	NA	NA	NA	NA	NA	NA
chr1_109620000_109620600	0.0064815	0.0390337	0.0623992	-0.342503	-2.83531	-2.4509	0.120081	1.33459	1.2833	NA	NA	NA	NA	NA	NA	NA
chr1_109620600_109621200	0.143876	0.000309412	0.00742334	-0.162476	-5.77401	-4.04468	0.109275	1.47987	1.44395	NA	NA	NA	NA	NA	NA	NA
chr1_109621200_109621800	0.556589	0.000315737	0.0026341	0.0637436	-6.7683	-5.37989	0.107631	1.73762	1.69169	NA	NA	NA	NA	NA	NA	NA
chr1_109622400_109623000	0.449331	0.00548341	0.00554013	0.0929448	-5.19485	-5.05584	0.121808	1.78234	1.73692	NA	NA	NA	NA	NA	NA	NA
chr1_109623000_109623600	0.133543	0.06693	0.00310718	0.19773	-3.13285	-5.08848	0.129468	1.66947	1.6302	NA	NA	NA	NA	NA	NA	NA
chr1_109623600_109624200	0.40251	0.60945	3.57503e-05	0.0975438	-0.737804	-6.38029	0.115443	1.43436	1.39393	NA	NA	NA	NA	NA	NA	NA
chr1_109624200_109624800	0.0549369	0.0524737	9.31322e-05	0.228215	-4.0509	-8.5148	0.115877	2.03493	1.98845	NA	NA	NA	NA	NA	NA	NA
chr1_109624800_109625400	0.126179	0.183233	4.47544e-05	0.173113	-2.04483	-6.66353	0.111141	1.51333	1.47799	NA	NA	NA	NA	NA	NA	NA
chr1_109625400_109626000	0.331342	0.634764	0.000910603	0.10794	-0.61769	-4.41666	0.109943	1.29167	1.24538	NA	NA	NA	NA	NA	NA	NA
chr1_109626000_109626600	0.875256	0.0311337	0.000576964	0.0187236	-3.68566	-5.97924	0.118607	1.65761	1.6167	NA	NA	NA	NA	NA	NA	NA
chr1_109626600_109627200	0.314575	0.617292	0.000831962	-0.117767	0.646322	-4.43598	0.115823	1.28467	1.24023	0.470589	0.00552226	5.0823	1.78565	2.84619	0.00998113	0.00541743
chr1_109627200_109627800	0.783414	0.837373	0.00310795	-0.0325692	0.261422	-3.81328	0.117798	1.26646	1.22169	0.585838	0.00777951	4.0747	1.75967	2.3156	0.0313169	0.0110607
chr1_109627800_109628400	0.43925	0.233638	0.00281268	0.102031	-1.94104	-4.95878	0.13077	1.60829	1.57077	NA	NA	NA	NA	NA	NA	NA
chr1_109629000_109629600	0.386709	0.0524656	5.01402e-05	0.0960615	-3.7639	-8.27415	0.109922	1.89069	1.84953	NA	NA	NA	NA	NA	NA	NA
chr1_109629600_109630200	0.253874	0.208603	0.00395226	0.155889	-2.26014	-5.24453	0.134917	1.77223	1.72818	NA	NA	NA	NA	NA	NA	NA
chr1_109630200_109630800	0.101848	0.278652	0.198082	-0.295871	-2.49909	-2.89982	0.177243	2.27957	2.22057	NA	NA	NA	NA	NA	NA	NA
chr1_109631400_109632000	0.37338	0.04372	5.93367e-05	0.0995008	-3.79449	-7.92753	0.11069	1.82972	1.79281	NA	NA	NA	NA	NA	NA	NA
chr1_109632000_109632600	0.199827	0.027669	0.000233354	0.153058	-4.42185	-7.43299	0.117671	1.94443	1.86183	NA	NA	NA	NA	NA	NA	NA
chr1_10963800_10964400	0.715194	0.0213735	0.00379964	-0.0481599	-4.83992	-6.02977	0.131174	2.03129	1.97763	NA	NA	NA	NA	NA	NA	NA
chr1_109643400_109644000	0.759173	0.0442967	4.79323e-05	0.0320643	-3.19008	-6.74875	0.103971	1.54266	1.5039	NA	NA	NA	NA	NA	NA	NA
chr1_109644000_109644600	0.332323	0.0942949	0.0101799	-0.138115	-3.52777	-5.38901	0.140967	2.06492	2.01078	NA	NA	NA	NA	NA	NA	NA
chr1_109655400_109656000	0.192869	0.00175172	0.0163528	-0.144028	-4.44837	-3.20304	0.108988	1.3386	1.28515	NA	NA	NA	NA	NA	NA	NA
chr1_109656000_109656600	0.0247527	0.0157645	0.166087	-0.229146	-2.88066	-1.57244	0.0987136	1.14898	1.11742	NA	NA	NA	NA	NA	NA	NA
chr1_109656600_109657200	0.016605	0.00959897	0.0526635	-0.286589	-3.63114	-2.56666	0.115273	1.34347	1.29041	NA	NA	NA	NA	NA	NA	NA
chr1_109657800_109658400	0.0945263	0.48711	0.000148693	0.206066	-1.07244	-6.18172	0.120705	1.53085	1.49482	NA	NA	NA	NA	NA	NA	NA
chr1_109658400_109659000	0.00212392	0.164316	0.000411345	0.4001	-2.30742	-6.06777	0.12288	1.63272	1.59286	NA	NA	NA	NA	NA	NA	NA
chr1_109666800_109667400	0.194131	0.196043	0.000642889	0.16626	-2.2444	-6.10992	0.126175	1.71073	1.66818	NA	NA	NA	NA	NA	NA	NA
chr1_109667400_109668000	0.936102	0.249404	0.162444	0.00934517	-1.41904	-1.67873	0.115931	1.21645	1.18248	NA	NA	NA	NA	NA	NA	NA
chr1_109668000_109668600	0.405276	0.403845	0.06522	-0.101196	-1.07219	-2.32861	0.120478	1.27257	1.2328	NA	NA	NA	NA	NA	NA	NA
chr1_109670400_109671000	0.0379722	0.201362	8.93005e-07	0.211852	-2.11665	-9.02419	0.0991492	1.63294	1.59084	NA	NA	NA	NA	NA	NA	NA
chr1_109686600_109687200	0.0282229	0.0398331	0.132245	0.342675	-4.29915	-3.03508	0.151248	2.03224	1.98047	NA	NA	NA	NA	NA	NA	NA
chr1_109687200_109687800	0.238434	0.0113823	0.104921	0.163151	-4.07542	-2.45864	0.136594	1.54575	1.48642	NA	NA	NA	NA	NA	NA	NA
chr1_109687800_109688400	0.796778	0.0178699	0.17834	0.0391153	-4.24824	-2.29466	0.151015	1.7295	1.6789	NA	NA	NA	NA	NA	NA	NA
chr1_109711200_109711800	0.638902	0.174467	0.000577065	0.056618	-2.20703	-5.77092	0.119862	1.6001	1.5604	NA	NA	NA	NA	NA	NA	NA
chr1_109711800_109712400	0.98363	0.0960959	0.000174485	-0.0023229	-2.66181	-6.24167	0.112599	1.56681	1.528	NA	NA	NA	NA	NA	NA	NA
chr1_109713000_109713600	0.0355179	0.149232	0.00106415	0.292319	-3.14507	-7.33602	0.13495	2.14417	2.09969	NA	NA	NA	NA	NA	NA	NA
chr1_109737000_109737600	0.124112	0.101069	1.59216e-05	0.170427	-2.90526	-8.15336	0.108803	1.73632	1.69085	NA	NA	NA	NA	NA	NA	NA
chr1_109737600_109738200	0.127225	0.784863	1.95321e-07	0.155319	-0.394576	-8.57244	0.0999989	1.43698	1.40217	NA	NA	NA	NA	NA	NA	NA
chr1_109738200_109738800	0.112654	0.133695	0.00167989	0.227472	-3.52577	-7.39593	0.140651	2.30949	2.21591	NA	NA	NA	NA	NA	NA	NA
chr1_109741200_109741800	0.903787	0.00842727	0.289635	-0.0166453	-4.3034	-1.63239	0.136945	1.56325	1.52379	NA	NA	NA	NA	NA	NA	NA
chr1_109741800_109742400	0.764514	0.00334669	0.146355	0.0403723	-4.88924	-2.27525	0.133976	1.57984	1.53993	NA	NA	NA	NA	NA	NA	NA
chr1_109749600_109750200	0.712388	0.276717	0.000109129	0.0454327	-2.09182	-7.82994	0.122481	1.90031	1.8499	NA	NA	NA	NA	NA	NA	NA
chr1_109750200_109750800	0.376305	0.16938	2.81897e-05	0.0989212	-2.21157	-7.19303	0.110727	1.58409	1.54706	NA	NA	NA	NA	NA	NA	NA
chr1_109750800_109751400	0.12039	0.0458658	4.60485e-05	0.171068	-3.52402	-7.5281	0.108101	1.7172	1.67299	NA	NA	NA	NA	NA	NA	NA
chr1_109751400_109752000	0.425709	0.875727	0.0116295	0.111563	-0.236874	-3.80086	0.138813	1.50624	1.44623	NA	NA	NA	NA	NA	NA	NA
chr1_10975200_10975800	0.660083	0.00677898	0.00272129	0.0514751	-5.29749	-5.66994	0.116285	1.86833	1.78939	NA	NA	NA	NA	NA	NA	NA
chr1_109752000_109752600	0.487559	0.941751	0.000469084	0.0908021	-0.114478	-5.73009	0.12975	1.55818	1.52135	NA	NA	NA	NA	NA	NA	NA
chr1_109752600_109753200	0.355835	0.179759	0.00455373	0.131742	-3.02032	-6.34875	0.141245	2.2172	2.12826	NA	NA	NA	NA	NA	NA	NA
chr1_109759200_109759800	0.0357712	0.238658	0.000821525	0.262356	1.53053	-4.42631	0.121292	1.28202	1.23607	0.186129	0.00550505	5.95684	1.78085	3.34494	0.00322551	0.0028069
chr1_109759800_109760400	0.0344928	0.46933	4.54905e-06	0.239843	0.931759	-6.37063	0.110073	1.27707	1.22624	0.368339	0.00124231	7.30238	1.77048	4.12453	0.00052578	0.00100499
chr1_109760400_109761000	0.249398	0.697487	4.12794e-06	0.129689	-0.617953	-8.04636	0.111172	1.57981	1.54029	NA	NA	NA	NA	NA	NA	NA
chr1_109761000_109761600	0.81367	0.689419	2.2795e-05	0.0285316	-0.694492	-7.93354	0.120361	1.72685	1.68303	NA	NA	NA	NA	NA	NA	NA
chr1_109762800_109763400	0.559545	0.490138	0.00933292	0.0907772	-1.39257	-5.29641	0.154437	2.00179	1.95176	NA	NA	NA	NA	NA	NA	NA
chr1_109763400_109764000	0.999746	0.838411	0.00304216	4.17898e-05	-0.296769	-4.34773	0.13044	1.44706	1.38952	NA	NA	NA	NA	NA	NA	NA
chr1_109764000_109764600	0.431998	0.472655	0.00295515	0.0976209	-0.989478	-4.12329	0.123144	1.36645	1.31344	NA	NA	NA	NA	NA	NA	NA
chr1_109764600_109765200	0.79931	0.0195466	0.00282261	0.0314753	-4.49739	-5.71015	0.123087	1.85873	1.8095	NA	NA	NA	NA	NA	NA	NA
chr1_109774200_109774800	0.197472	0.00563	0.000476763	0.138821	-5.10577	-6.47601	0.106157	1.75768	1.72182	NA	NA	NA	NA	NA	NA	NA
chr1_109774800_109775400	0.439899	0.0063333	0.00334397	0.0900523	-5.26048	-5.44931	0.115582	1.83873	1.76064	NA	NA	NA	NA	NA	NA	NA
chr1_109776600_109777200	0.358386	0.952213	0.1542	0.126269	-0.081903	-1.89907	0.136104	1.35925	1.31087	NA	NA	NA	NA	NA	NA	NA
chr1_109777200_109777800	0.216892	0.809035	0.252155	0.174699	0.33306	-1.53254	0.139534	1.37025	1.3215	0.573047	0.0619696	1.8656	1.90366	0.980003	0.338792	0.0655883
chr1_10979400_10980000	0.950244	0.0624706	0.00151002	-0.0080731	-3.99674	-6.77672	0.128671	2.0933	2.00826	NA	NA	NA	NA	NA	NA	NA
chr1_109794000_109794600	0.994611	0.124329	3.58566e-05	0.000880095	1.30607	3.74334	0.129609	0.83431	0.817988	0.0974367	0.00189236	-2.43727	1.16841	-2.08597	0.0499989	0.0151733
chr1_109794600_109795200	0.450391	0.160534	3.33858e-05	-0.0998066	1.20879	3.82035	0.131109	0.847506	0.830866	0.124987	0.0018557	-2.61156	1.18685	-2.20042	0.0396945	0.0129801
chr1_109797000_109797600	0.0459787	0.241042	0.00031831	0.259885	-2.35879	-7.56365	0.126707	1.986	1.94311	NA	NA	NA	NA	NA	NA	NA
chr1_10980000_10980600	0.890873	0.0464037	0.000215313	-0.0163921	-3.97407	-7.63736	0.118816	1.9415	1.90078	NA	NA	NA	NA	NA	NA	NA
chr1_109802400_109803000	0.0427202	0.834966	0.00176764	0.292714	-0.414147	-6.39017	0.140444	1.97664	1.92475	NA	NA	NA	NA	NA	NA	NA
chr1_109803000_109803600	0.569114	0.320294	0.0013513	0.0712246	-1.64785	-5.45676	0.124198	1.64014	1.59903	NA	NA	NA	NA	NA	NA	NA
chr1_10980600_10981200	0.51125	0.0371342	0.000112629	-0.0765679	-4.18883	-8.07424	0.115655	1.95142	1.91208	NA	NA	NA	NA	NA	NA	NA
chr1_109806600_109807200	0.729783	0.0166821	0.000197153	-0.0380465	-4.10228	-6.51236	0.109479	1.65129	1.60955	NA	NA	NA	NA	NA	NA	NA
chr1_109807200_109807800	0.360309	0.64888	3.49467e-05	-0.111099	-0.772038	-7.52719	0.120237	1.6845	1.64202	NA	NA	NA	NA	NA	NA	NA
chr1_109816800_109817400	0.4098	0.0641695	0.000312604	0.0997532	-3.74101	-7.39151	0.11992	1.97249	1.89605	NA	NA	NA	NA	NA	NA	NA
chr1_109817400_109818000	0.999747	0.143177	0.00149571	4.06305e-05	-3.00962	-6.56041	0.127301	2.02055	1.94227	NA	NA	NA	NA	NA	NA	NA
chr1_109818600_109819200	0.101079	0.694868	0.000115284	0.209925	0.66162	-6.88684	0.125465	1.67614	1.63371	0.516425	0.00271883	7.54846	2.34062	3.22499	0.00424677	0.00328367
chr1_109819200_109819800	0.962363	0.267793	0.00092129	-0.00616275	-2.27205	-7.03279	0.129888	2.02547	1.98526	NA	NA	NA	NA	NA	NA	NA
chr1_109821600_109822200	0.224834	0.0501542	0.485922	0.195218	-3.5193	-1.19519	0.158674	1.74962	1.7014	NA	NA	NA	NA	NA	NA	NA
chr1_109822200_109822800	0.00625456	0.0433249	0.732275	0.401645	-2.90894	0.463567	0.14016	1.39994	1.34685	0.0379345	0.209452	-3.37251	1.94264	-1.73604	0.0979375	0.0241823
chr1_109822800_109823400	0.22395	0.0946506	0.197693	0.192455	-3.29777	-2.46284	0.156125	1.93244	1.88429	NA	NA	NA	NA	NA	NA	NA
chr1_109823400_109824000	0.327709	0.734695	0.00450576	0.140226	0.545519	-4.66348	0.141748	1.60001	1.56128	0.53829	0.00842617	5.209	2.23554	2.33008	0.0303874	0.0108412
chr1_109824000_109824600	0.159635	0.267976	0.00086321	0.18571	-1.89231	-5.86765	0.129919	1.6876	1.64619	NA	NA	NA	NA	NA	NA	NA
chr1_109878000_109878600	0.439737	0.0634068	0.000133019	0.0914819	-3.69352	-7.93443	0.117375	1.94165	1.9025	NA	NA	NA	NA	NA	NA	NA
chr1_109881600_109882200	0.645242	0.0379507	0.0408309	0.0603241	-3.71552	-3.56652	0.130169	1.7387	1.69475	NA	NA	NA	NA	NA	NA	NA
chr1_109884000_109884600	0.21794	0.0446561	0.000924241	0.148539	-3.56896	-5.96545	0.118916	1.72892	1.68447	NA	NA	NA	NA	NA	NA	NA
chr1_109884600_109885200	0.0766684	0.0358158	0.000191542	0.20084	-3.53016	-6.45171	0.110899	1.63247	1.59095	NA	NA	NA	NA	NA	NA	NA
chr1_109886400_109887000	0.712222	0.847768	7.63102e-05	0.0263353	0.169489	-3.73652	0.0709539	0.877945	0.860145	0.589391	0.00234351	3.906	1.22908	3.17799	0.00472767	0.00348531
chr1_109887000_109887600	0.635079	0.538026	0.000255113	0.021839	0.277168	-1.74958	0.0457107	0.446725	0.441393	0.417913	0.00361239	2.02675	0.628005	3.22728	0.00422465	0.00327974
chr1_109887600_109888200	0.853651	0.415305	0.000658428	0.010151	0.443988	-1.94211	0.054722	0.540119	0.531399	0.326719	0.00515968	2.3861	0.757703	3.14912	0.0050489	0.00364307
chr1_109891800_109892400	0.678348	0.264331	0.0110251	0.0609798	-2.21674	-5.06508	0.146105	1.96171	1.91207	NA	NA	NA	NA	NA	NA	NA
chr1_109892400_109893000	0.780034	0.263178	0.00093385	-0.0363625	-1.927	-5.8709	0.129442	1.70114	1.65941	NA	NA	NA	NA	NA	NA	NA
chr1_109894800_109895400	0.156583	3.37331e-05	0.0187048	0.15861	-8.052	-4.15808	0.110131	1.75238	1.70576	NA	NA	NA	NA	NA	NA	NA
chr1_109895400_109896000	0.103749	0.0394936	0.000134752	0.209079	-1.88218	3.62981	0.125964	0.888123	0.871198	0.0351214	0.00285418	-5.512	1.24409	-4.43056	0.000257211	0.000653927
chr1_109896000_109896600	0.360252	0.612077	2.55502e-05	0.122916	-0.423305	3.81306	0.133011	0.829044	0.814876	0.467222	0.00171079	-4.23636	1.16247	-3.64427	0.00161347	0.00192938
chr1_109896600_109897200	0.106571	0.000609079	0.333112	0.207599	-4.71982	1.21486	0.126121	1.28238	1.24199	0.00384187	0.0837062	-5.93469	1.78523	-3.32432	0.00338208	0.00288843
chr1_109901400_109902000	0.482244	2.51829e-06	4.39622e-05	0.0885987	3.85705	3.18495	0.125061	0.718335	0.705574	0.00245825	0.00198468	0.6721	1.0069	0.667497	0.512084	0.0935405
chr1_109902000_109902600	0.0100947	5.29297e-06	0.00480274	0.325887	4.03281	2.2745	0.121449	0.783001	0.767493	0.00246415	0.00851325	1.7583	1.09642	1.60368	0.124461	0.0289783
chr1_109906200_109906800	0.560329	0.0717441	0.000911926	0.0724969	-3.43096	-6.4262	0.123585	1.8614	1.81227	NA	NA	NA	NA	NA	NA	NA
chr1_109906800_109907400	0.603893	0.156714	0.00294759	0.0665943	-2.66055	-5.64989	0.127476	1.84795	1.7992	NA	NA	NA	NA	NA	NA	NA
chr1_109908000_109908600	0.105513	0.903593	6.49989e-08	0.163083	0.170091	-8.76494	0.0987681	1.39655	1.36277	0.609884	0.000902498	8.93503	1.95128	4.57906	0.000181996	0.00054379
chr1_109908600_109909200	0.406236	0.527436	2.71773e-06	0.0927989	-1.04137	-8.52422	0.110708	1.63542	1.59419	NA	NA	NA	NA	NA	NA	NA
chr1_109914000_109914600	0.812112	0.194404	0.0340432	-0.0336022	-2.10162	-3.38265	0.140553	1.59592	1.54835	NA	NA	NA	NA	NA	NA	NA
chr1_109914600_109915200	0.659774	0.623956	0.0150925	0.0639049	-0.785658	-3.85845	0.144224	1.59178	1.5283	NA	NA	NA	NA	NA	NA	NA
chr1_109915200_109915800	0.816062	0.155187	0.00201583	-0.0319275	-3.18664	-6.92891	0.136472	2.20503	2.11616	NA	NA	NA	NA	NA	NA	NA
chr1_109921800_109922400	0.110224	0.859431	0.0236245	-0.238898	0.287758	-3.67887	0.146688	1.61577	1.57154	0.592981	0.012224	3.96662	2.25399	1.75982	0.0937256	0.0234589
chr1_109922400_109923000	0.955799	0.417705	0.000828509	-0.00701941	1.10219	-4.63205	0.125956	1.34781	1.29454	0.328709	0.00551518	5.73424	1.86881	3.0684	0.00606372	0.00406307
chr1_109923000_109923600	0.96766	0.151159	7.11274e-06	0.0042219	-2.33766	-7.89722	0.103569	1.60143	1.55985	NA	NA	NA	NA	NA	NA	NA
chr1_109923600_109924200	0.925643	0.0127812	5.57275e-05	0.00986629	-4.60987	-7.72679	0.105139	1.77925	1.73981	NA	NA	NA	NA	NA	NA	NA
chr1_109928400_109929000	0.423634	0.652071	0.000148671	0.0961675	-0.658449	-5.85255	0.119119	1.45081	1.4152	NA	NA	NA	NA	NA	NA	NA
chr1_109929000_109929600	0.600087	0.921352	8.53557e-05	-0.0632044	-0.156999	-6.64436	0.119722	1.58148	1.54188	NA	NA	NA	NA	NA	NA	NA
chr1_109930800_109931400	0.46711	0.122325	0.000702656	0.0930448	-3.21618	-7.22637	0.126889	2.04324	1.98903	NA	NA	NA	NA	NA	NA	NA
chr1_109933800_109934400	0.0554997	0.0664375	0.000312244	0.23832	-3.73231	-7.48499	0.121299	1.9852	1.91984	NA	NA	NA	NA	NA	NA	NA
chr1_109977600_109978200	0.996495	0.986046	0.90197	0.000631569	0.0233317	-0.159971	0.14301	1.32678	1.2916	0.634305	0.261954	0.183302	1.85164	0.0989943	0.922128	0.161272
chr1_109978200_109978800	0.70218	0.849643	0.15106	0.0546765	0.275662	-2.04241	0.142101	1.44595	1.39883	0.589756	0.0371198	2.31807	2.01184	1.15222	0.262819	0.0532092
chr1_109979400_109980000	0.406041	0.00702586	0.0680475	0.108128	-4.40189	-2.84678	0.128943	1.55989	1.52345	NA	NA	NA	NA	NA	NA	NA
chr1_109980000_109980600	0.920691	0.00272116	0.110682	-0.0132201	-5.58677	-2.79525	0.132055	1.76313	1.71861	NA	NA	NA	NA	NA	NA	NA
chr1_109980600_109981200	0.25436	0.0544238	6.28867e-05	0.128419	-3.33058	-7.24595	0.111258	1.68738	1.64535	NA	NA	NA	NA	NA	NA	NA
chr1_109981200_109981800	0.061991	0.114332	1.64973e-05	0.209587	-2.97503	-8.66104	0.109563	1.84834	1.80012	NA	NA	NA	NA	NA	NA	NA
chr1_109983600_109984200	0.832895	0.0531701	1.1497e-06	0.0201918	-3.39327	-9.32138	0.0951589	1.7098	1.66485	NA	NA	NA	NA	NA	NA	NA
chr1_109984200_109984800	0.713696	0.143838	0.000142376	0.0388663	-2.0278	-5.43585	0.105281	1.36369	1.31012	NA	NA	NA	NA	NA	NA	NA
chr1_109984800_109985400	0.963596	0.865448	0.0431475	-0.00548083	0.211197	-2.50581	0.119432	1.23946	1.20487	0.595039	0.0154654	2.71701	1.72857	1.57182	0.131679	0.0302944
chr1_109985400_109986000	0.525563	0.207751	0.0115034	0.0874681	-2.03179	-4.07594	0.136741	1.59015	1.54838	NA	NA	NA	NA	NA	NA	NA
chr1_110003400_110004000	0.856711	0.0331382	0.183782	-0.0261504	-3.50963	-2.07543	0.144017	1.59788	1.53793	NA	NA	NA	NA	NA	NA	NA
chr1_110004000_110004600	0.373164	0.0446813	0.298304	-0.127106	-3.14509	-1.5395	0.141336	1.52378	1.46344	NA	NA	NA	NA	NA	NA	NA
chr1_110017800_110018400	0.935634	0.00572754	0.000124882	0.00875486	-5.47118	-7.75334	0.107816	1.88762	1.85028	NA	NA	NA	NA	NA	NA	NA
chr1_110018400_110019000	0.737654	0.00405532	6.99241e-05	0.0350535	-5.5675	-7.87756	0.104018	1.84027	1.80218	NA	NA	NA	NA	NA	NA	NA
chr1_110022000_110022600	0.0569506	0.20257	0.00189899	0.262597	-2.72661	-6.78086	0.134477	2.10924	2.05786	NA	NA	NA	NA	NA	NA	NA
chr1_110034000_110034600	0.0310038	0.00661846	0.452364	0.327599	-4.18033	1.07344	0.147217	1.46966	1.4163	0.0101331	0.118976	-5.25377	2.04103	-2.57408	0.0181131	0.0077846
chr1_110040000_110040600	0.00155983	0.00173944	0.00427524	0.401017	-6.53474	-5.66446	0.119235	1.96499	1.8843	NA	NA	NA	NA	NA	NA	NA
chr1_110050200_110050800	0.0361975	0.0879864	0.00132057	0.264707	-3.04977	-5.83077	0.122674	1.74957	1.7047	NA	NA	NA	NA	NA	NA	NA
chr1_110050800_110051400	0.039341	0.197709	0.000253737	0.253243	-2.16156	-6.39287	0.119398	1.65384	1.61212	NA	NA	NA	NA	NA	NA	NA
chr1_110057400_110058000	0.229091	0.0588702	0.000302919	-0.142113	-3.61766	-7.13348	0.11659	1.86744	1.8251	NA	NA	NA	NA	NA	NA	NA
chr1_110058000_110058600	0.0173457	0.125225	0.000568954	0.30214	-3.00577	-6.96583	0.1224	1.92475	1.88112	NA	NA	NA	NA	NA	NA	NA
chr1_110058600_110059200	0.0476096	0.0445007	0.0125629	0.270134	-3.33079	-4.08843	0.132728	1.61232	1.57386	NA	NA	NA	NA	NA	NA	NA
chr1_110059200_110059800	0.381635	0.0391653	0.0159967	0.114278	-3.31373	-3.81213	0.129368	1.56088	1.52409	NA	NA	NA	NA	NA	NA	NA
chr1_110063400_110064000	0.883027	0.504643	0.000965274	0.0204389	-1.35663	-6.92715	0.138145	2.01737	1.96414	NA	NA	NA	NA	NA	NA	NA
chr1_110064000_110064600	0.287274	0.218885	0.0162181	-0.145446	-2.31474	-4.51437	0.135098	1.85698	1.80886	NA	NA	NA	NA	NA	NA	NA
chr1_110067000_110067600	0.0925598	0.0233324	0.235529	-0.191389	-2.43786	1.21745	0.111416	1.0391	1.01289	0.0234342	0.0576266	-3.65531	1.45109	-2.51901	0.0203879	0.00837772
chr1_110067600_110068200	0.156483	0.00568624	0.358208	-0.174758	-3.48482	1.08467	0.121314	1.20119	1.16872	0.00933801	0.0909537	-4.5695	1.67594	-2.72653	0.0129999	0.00635873
chr1_110070000_110070600	0.958227	0.0369587	0.143094	-0.00784701	-3.47362	-2.31319	0.148998	1.61666	1.55266	NA	NA	NA	NA	NA	NA	NA
chr1_110070600_110071200	0.328507	0.22044	3.70903e-06	0.102414	-2.02995	-8.36386	0.103699	1.6341	1.59145	NA	NA	NA	NA	NA	NA	NA
chr1_110071200_110071800	0.861388	0.172487	3.0042e-06	0.0180506	-2.31425	-8.64901	0.102801	1.66997	1.6265	NA	NA	NA	NA	NA	NA	NA
chr1_110085000_110085600	0.109193	0.00347564	0.134366	0.211188	-5.90214	-2.86055	0.129287	1.91555	1.87707	NA	NA	NA	NA	NA	NA	NA
chr1_110089200_110089800	0.141733	0.329951	0.168422	0.233751	-1.61725	-2.21	0.156352	1.64248	1.57934	NA	NA	NA	NA	NA	NA	NA
chr1_110089800_110090400	0.96297	0.968153	0.217124	-0.00749575	-0.064976	-1.9558	0.160575	1.61863	1.56292	NA	NA	NA	NA	NA	NA	NA
chr1_110101800_110102400	0.443948	0.0241345	0.000603018	0.0925177	-4.49184	-6.91278	0.119812	1.92621	1.87652	NA	NA	NA	NA	NA	NA	NA
chr1_110102400_110103000	0.199656	0.0184473	0.000421297	0.151016	-4.58358	-6.94708	0.116056	1.87595	1.82743	NA	NA	NA	NA	NA	NA	NA
chr1_110103000_110103600	0.669998	0.175184	0.00104423	-0.0554285	-2.81733	-7.00599	0.129234	2.04603	2.00157	NA	NA	NA	NA	NA	NA	NA
chr1_110106000_110106600	0.947648	0.270869	0.00176212	0.00860801	-2.25665	-6.57809	0.130384	2.02489	1.9807	NA	NA	NA	NA	NA	NA	NA
chr1_110107800_110108400	0.760577	0.0532112	0.00030414	0.0345501	-3.15255	-6.05391	0.11271	1.58879	1.54941	NA	NA	NA	NA	NA	NA	NA
chr1_110112000_110112600	0.149581	0.0610135	4.7748e-06	0.149373	-3.38098	-8.87785	0.101925	1.76053	1.71357	NA	NA	NA	NA	NA	NA	NA
chr1_110112600_110113200	0.681586	0.957218	1.58402e-07	0.0409649	0.0745476	-8.32198	0.0992089	1.38211	1.34784	0.627571	0.00090941	8.39653	1.93052	4.34936	0.000310877	0.000735299
chr1_110113200_110113800	0.694139	0.0318863	8.82358e-05	-0.0440351	-4.19991	-7.83454	0.111278	1.89771	1.82243	NA	NA	NA	NA	NA	NA	NA
chr1_11011800_11012400	0.337508	0.0168891	0.17087	0.137853	-3.26487	1.78472	0.142232	1.31686	1.2829	0.0185386	0.0416899	-5.04959	1.83847	-2.74663	0.0124382	0.00620961
chr1_110121000_110121600	0.107954	0.433956	0.00640995	0.235963	-1.73159	-6.08226	0.143934	2.19368	2.12932	NA	NA	NA	NA	NA	NA	NA
chr1_11012400_11013000	0.304789	0.0403116	0.164054	0.155425	-2.85702	1.86641	0.149765	1.35394	1.31983	0.0356755	0.0400688	-4.72343	1.89079	-2.49813	0.0213187	0.00861959
chr1_110129400_110130000	0.602372	0.445011	0.000431575	-0.0636253	-1.07959	-5.11744	0.121281	1.40138	1.34893	NA	NA	NA	NA	NA	NA	NA
chr1_110130000_110130600	0.449132	0.930394	4.88725e-05	-0.084659	0.114417	-5.61224	0.1109	1.30272	1.25231	0.618846	0.00205906	5.72665	1.80703	3.1691	0.00482445	0.00353338
chr1_110130600_110131200	0.681861	0.253665	0.000423465	-0.0536152	-2.28612	-7.31659	0.129964	1.97768	1.92547	NA	NA	NA	NA	NA	NA	NA
chr1_110136600_110137200	0.531162	0.0103082	0.0532323	0.0837607	-4.07844	-2.9053	0.132743	1.52454	1.46432	NA	NA	NA	NA	NA	NA	NA
chr1_110137200_110137800	0.993135	0.0013154	0.0662372	-0.00110112	-5.23519	-2.79172	0.127282	1.52997	1.48376	NA	NA	NA	NA	NA	NA	NA
chr1_110150400_110151000	0.43249	0.0735047	0.604787	-0.125881	-3.34316	-0.927518	0.158963	1.82537	1.77988	NA	NA	NA	NA	NA	NA	NA
chr1_110151000_110151600	0.405587	0.0927387	0.0348239	0.127017	-3.61447	-4.46086	0.151319	2.10534	2.05118	NA	NA	NA	NA	NA	NA	NA
chr1_110151600_110152200	0.490455	0.00913207	0.000432342	0.0781692	-5.0194	-6.81028	0.112449	1.84399	1.79543	NA	NA	NA	NA	NA	NA	NA
chr1_110160600_110161200	0.301743	0.0259108	0.000184914	0.116296	-4.26774	-7.2526	0.111348	1.85392	1.78353	NA	NA	NA	NA	NA	NA	NA
chr1_110161200_110161800	0.491085	0.0276291	0.0016572	0.0885881	-4.69711	-6.60851	0.127623	2.06491	1.9772	NA	NA	NA	NA	NA	NA	NA
chr1_110166600_110167200	0.735965	0.0049214	0.00974283	0.0420485	-5.21906	-4.64469	0.123945	1.76644	1.72213	NA	NA	NA	NA	NA	NA	NA
chr1_110167200_110167800	0.457635	0.00748832	0.00119799	-0.0861241	-5.2311	-6.2851	0.114977	1.8697	1.81984	NA	NA	NA	NA	NA	NA	NA
chr1_110172000_110172600	0.392964	0.0182565	0.000194332	0.0974373	-4.60195	-7.36205	0.11299	1.88019	1.8175	NA	NA	NA	NA	NA	NA	NA
chr1_110172600_110173200	0.509337	0.21487	5.17087e-05	0.0771205	-2.2408	-7.74631	0.115962	1.78176	1.73521	NA	NA	NA	NA	NA	NA	NA
chr1_110173200_110173800	0.417878	0.148515	0.000422769	0.104812	-3.05118	-7.73417	0.128216	2.07641	2.03508	NA	NA	NA	NA	NA	NA	NA
chr1_110188200_110188800	0.317736	3.80528e-05	0.14003	0.12199	-7.50555	-2.41098	0.120772	1.64663	1.6056	NA	NA	NA	NA	NA	NA	NA
chr1_110191800_110192400	0.264854	0.105037	1.13989e-05	-0.117499	-2.69364	-7.81275	0.104096	1.62906	1.58723	NA	NA	NA	NA	NA	NA	NA
chr1_110192400_110193000	0.426063	0.240469	1.81787e-06	-0.0800964	-1.7334	-7.76863	0.0997377	1.45764	1.42152	NA	NA	NA	NA	NA	NA	NA
chr1_110193000_110193600	0.712057	0.205627	0.00108924	0.0494596	-2.69431	-7.1687	0.133177	2.09864	2.05644	NA	NA	NA	NA	NA	NA	NA
chr1_110197800_110198400	0.0370125	0.06199	0.000221257	-0.252442	-3.7394	-7.65818	0.117524	1.95479	1.9101	NA	NA	NA	NA	NA	NA	NA
chr1_110198400_110199000	0.448929	0.717965	2.9182e-05	-0.0891403	-0.581687	-7.23884	0.116718	1.60065	1.56044	NA	NA	NA	NA	NA	NA	NA
chr1_110199000_110199600	0.124591	0.540272	0.000241704	0.191054	-1.07435	-6.75251	0.122131	1.74123	1.69616	NA	NA	NA	NA	NA	NA	NA
chr1_110199600_110200200	0.511816	0.400009	0.00923624	0.0983723	-1.92361	-5.96443	0.148791	2.26444	2.19468	NA	NA	NA	NA	NA	NA	NA
chr1_110209200_110209800	0.864785	0.0470869	0.00905095	0.0185968	-2.77044	-3.56384	0.1086	1.35788	1.30761	NA	NA	NA	NA	NA	NA	NA
chr1_110209800_110210400	0.991594	0.0389617	0.041869	-0.00128802	-2.98591	-2.82798	0.121591	1.40493	1.35101	NA	NA	NA	NA	NA	NA	NA
chr1_110223000_110223600	0.513307	0.0214948	2.76272e-05	-0.0676674	-4.1878	-8.02631	0.102713	1.75933	1.72401	NA	NA	NA	NA	NA	NA	NA
chr1_110223600_110224200	0.28595	0.0243068	0.000356237	-0.126951	-4.47723	-7.10658	0.117592	1.92241	1.84294	NA	NA	NA	NA	NA	NA	NA
chr1_110228400_110229000	0.406009	0.0251786	0.000134324	-0.0931861	-4.23734	-7.47713	0.111116	1.83108	1.79417	NA	NA	NA	NA	NA	NA	NA
chr1_110229600_110230200	0.680331	0.0149685	0.00782409	-0.052052	-3.94723	-4.21002	0.125535	1.56142	1.51376	NA	NA	NA	NA	NA	NA	NA
chr1_110230200_110230800	0.565437	0.0354312	0.0191835	0.078412	-3.48642	-3.78757	0.135435	1.60872	1.5604	NA	NA	NA	NA	NA	NA	NA
chr1_110237400_110238000	0.18537	0.258777	0.0028832	0.192243	-2.58627	-6.94667	0.142983	2.26187	2.20663	NA	NA	NA	NA	NA	NA	NA
chr1_110239800_110240400	0.554198	0.660225	0.00364673	-0.0776698	0.614558	-4.09348	0.130352	1.38894	1.33606	0.497925	0.00806337	4.70804	1.92723	2.44291	0.0239749	0.00931746
chr1_110240400_110241000	0.545633	0.875097	0.00132818	-0.0698163	-0.206003	-4.29683	0.114674	1.30328	1.25695	NA	NA	NA	NA	NA	NA	NA
chr1_110243400_110244000	0.61494	0.0221648	0.000261547	-0.0606067	-4.77683	-7.6466	0.119663	2.01761	1.93302	NA	NA	NA	NA	NA	NA	NA
chr1_110308800_110309400	0.25571	0.0418441	0.0010933	0.139984	-3.8812	-6.29244	0.121627	1.85393	1.80573	NA	NA	NA	NA	NA	NA	NA
chr1_110309400_110310000	0.490058	0.0470936	0.00110298	0.0856294	-3.83301	-6.37188	0.123067	1.87874	1.8301	NA	NA	NA	NA	NA	NA	NA
chr1_110310000_110310600	0.864384	0.0886296	0.00149292	-0.0235811	-3.94552	-7.33715	0.137296	2.26817	2.17182	NA	NA	NA	NA	NA	NA	NA
chr1_110337600_110338200	0.241855	0.207349	0.049445	-0.170483	-2.02982	-3.07516	0.143792	1.58717	1.52387	NA	NA	NA	NA	NA	NA	NA
chr1_110338200_110338800	0.322092	0.195814	0.0700782	0.116353	-1.238	1.71235	0.116244	0.943139	0.923335	0.152363	0.0202246	-2.95035	1.31987	-2.23534	0.0369603	0.0123813
chr1_110338800_110339400	0.896676	0.0679853	0.998858	-0.0157928	-2.24454	-0.00168499	0.120942	1.20089	1.17084	NA	NA	NA	NA	NA	NA	NA
chr1_110339400_110340000	0.708175	0.0937576	0.0321658	-0.0504473	-2.6185	-3.2465	0.133942	1.53011	1.46943	NA	NA	NA	NA	NA	NA	NA
chr1_110340000_110340600	0.351186	0.0291515	0.0048943	-0.121351	-3.69722	-4.73672	0.128843	1.6419	1.60208	NA	NA	NA	NA	NA	NA	NA
chr1_110340600_110341200	0.315576	0.0443136	0.00388033	-0.136899	-3.88116	-5.56596	0.134921	1.87701	1.83008	NA	NA	NA	NA	NA	NA	NA
chr1_110341200_110341800	0.499973	0.215216	7.43518e-05	-0.0772706	-2.20021	-7.42588	0.113649	1.75082	1.70627	NA	NA	NA	NA	NA	NA	NA
chr1_110341800_110342400	0.694162	0.140539	0.000431727	0.0458484	-2.75383	-6.7539	0.115869	1.83633	1.78035	NA	NA	NA	NA	NA	NA	NA
chr1_11037600_11038200	0.52728	0.183476	0.00112136	0.0814033	-2.73001	-6.84672	0.127791	2.02155	1.96965	NA	NA	NA	NA	NA	NA	NA
chr1_11038200_11038800	0.778669	0.981822	0.000130301	0.0355971	0.0384448	-6.83325	0.125915	1.67817	1.63591	0.633389	0.00282096	6.87169	2.3436	2.93211	0.00824083	0.00483219
chr1_11038800_11039400	0.862075	0.600972	0.00024901	-0.0208009	-0.887374	-6.5182	0.11906	1.68497	1.64123	NA	NA	NA	NA	NA	NA	NA
chr1_110390400_110391000	0.985116	0.0175043	0.00696411	-0.00242193	-4.76077	-5.31431	0.129122	1.93154	1.881	NA	NA	NA	NA	NA	NA	NA
chr1_110406600_110407200	0.570111	0.0178169	7.98039e-05	-0.0589855	-3.80996	-6.54495	0.103123	1.55031	1.51148	NA	NA	NA	NA	NA	NA	NA
chr1_110407200_110407800	0.183252	0.0316015	0.016613	-0.12683	-2.6149	-2.84741	0.0938677	1.17946	1.14539	NA	NA	NA	NA	NA	NA	NA
chr1_110407800_110408400	0.0993393	0.000109098	0.0434956	-0.167832	-5.41415	-2.55532	0.0997798	1.27912	1.23081	NA	NA	NA	NA	NA	NA	NA
chr1_110412600_110413200	0.794155	0.262011	0.0195851	-0.0368629	-2.2189	-4.60309	0.140463	1.95397	1.90305	NA	NA	NA	NA	NA	NA	NA
chr1_11042400_11043000	0.00935497	0.047797	0.000455863	0.345848	-4.32044	-7.68157	0.12749	2.12468	2.03442	NA	NA	NA	NA	NA	NA	NA
chr1_110425800_110426400	0.666654	0.104341	0.000311685	-0.0541065	-3.35903	-7.74923	0.124804	2.02728	1.98732	NA	NA	NA	NA	NA	NA	NA
chr1_11043000_11043600	0.203102	0.17945	0.00192442	0.162858	-2.04359	-4.74271	0.126134	1.4991	1.44135	NA	NA	NA	NA	NA	NA	NA
chr1_11043600_11044200	0.777104	0.150553	0.00961404	-0.0381192	-2.25439	-4.02812	0.133863	1.54205	1.49068	NA	NA	NA	NA	NA	NA	NA
chr1_11044200_11044800	0.493105	0.71374	0.000915111	0.0934056	-0.700264	-6.5512	0.135196	1.89718	1.84813	NA	NA	NA	NA	NA	NA	NA
chr1_11044800_11045400	0.259244	0.541073	0.000333224	0.151667	-1.21349	-7.44075	0.132775	1.97066	1.91884	NA	NA	NA	NA	NA	NA	NA
chr1_110452200_110452800	0.572859	0.689488	0.0171048	0.0894017	-0.903152	-5.43202	0.157423	2.24621	2.19552	NA	NA	NA	NA	NA	NA	NA
chr1_110452800_110453400	0.804522	0.515203	0.000292499	0.0317593	-1.2133	-7.06188	0.127583	1.85003	1.80158	NA	NA	NA	NA	NA	NA	NA
chr1_110453400_110454000	0.798038	0.531218	7.93162e-05	-0.0307171	-0.922926	-6.14454	0.119348	1.46284	1.41839	NA	NA	NA	NA	NA	NA	NA
chr1_11045400_11046000	0.523989	0.0894032	0.000281573	0.0751996	-3.23657	-7.17143	0.117113	1.86526	1.82383	NA	NA	NA	NA	NA	NA	NA
chr1_110454000_110454600	0.353696	0.24209	0.000274422	0.114282	-1.8625	-6.04859	0.121978	1.57169	1.53504	NA	NA	NA	NA	NA	NA	NA
chr1_110464200_110464800	0.894356	0.111104	0.000627882	-0.0169677	-3.28195	-7.2655	0.127069	2.0203	1.97945	NA	NA	NA	NA	NA	NA	NA
chr1_11046600_11047200	0.591847	0.582979	0.0345412	-0.0937064	-1.18419	-4.55151	0.173552	2.14162	2.08944	NA	NA	NA	NA	NA	NA	NA
chr1_110470800_110471400	0.692069	0.0664383	0.000258528	0.046143	-3.35989	-6.89733	0.115778	1.78711	1.74197	NA	NA	NA	NA	NA	NA	NA
chr1_110471400_110472000	0.934086	0.121575	0.00079135	0.0100606	-2.86831	-6.36967	0.12098	1.81848	1.77256	NA	NA	NA	NA	NA	NA	NA
chr1_11047200_11047800	0.817572	0.184476	0.0324452	0.0356621	-2.83369	-4.52001	0.15372	2.10321	2.04932	NA	NA	NA	NA	NA	NA	NA
chr1_110476800_110477400	0.80045	0.320898	0.0112662	-0.0355992	-1.61184	-4.115	0.140027	1.60632	1.55839	NA	NA	NA	NA	NA	NA	NA
chr1_110477400_110478000	0.913809	0.614905	0.00438662	0.0149539	-0.874286	-5.04475	0.137404	1.72604	1.68341	NA	NA	NA	NA	NA	NA	NA
chr1_110478600_110479200	0.240688	0.0937044	9.30626e-07	0.112255	-2.71725	-8.75319	0.0944419	1.58755	1.54634	NA	NA	NA	NA	NA	NA	NA
chr1_110479200_110479800	0.375719	0.0535159	5.91372e-07	0.0812528	-3.12967	-8.91008	0.0908379	1.57936	1.5382	NA	NA	NA	NA	NA	NA	NA
chr1_110479800_110480400	0.356749	0.000184223	0.169554	-0.117004	-6.47942	-2.1711	0.125685	1.59292	1.55575	NA	NA	NA	NA	NA	NA	NA
chr1_110480400_110481000	0.516044	0.00893779	0.330668	-0.0911643	-4.20241	-1.46064	0.139287	1.53917	1.48565	NA	NA	NA	NA	NA	NA	NA
chr1_110482200_110482800	0.549004	0.072084	0.00044607	0.0754892	-3.84264	-7.56122	0.125043	2.08733	1.99878	NA	NA	NA	NA	NA	NA	NA
chr1_110482800_110483400	0.585282	0.373946	1.09464e-06	0.0565695	-1.43565	-8.74772	0.102937	1.59901	1.5584	NA	NA	NA	NA	NA	NA	NA
chr1_110483400_110484000	0.769224	0.0098594	8.21439e-06	0.0288001	-4.69472	-8.56102	0.0975855	1.74365	1.70539	NA	NA	NA	NA	NA	NA	NA
chr1_110486400_110487000	0.543355	0.0829472	0.00114641	0.0746191	-3.22964	-6.15242	0.121867	1.82217	1.77374	NA	NA	NA	NA	NA	NA	NA
chr1_110487000_110487600	0.953357	0.306618	0.00111307	-0.007209	-1.80686	-5.92029	0.122577	1.74773	1.7019	NA	NA	NA	NA	NA	NA	NA
chr1_110487600_110488200	0.00619841	0.032134	0.0174709	-0.375314	-4.14495	-4.50354	0.130817	1.87572	1.8266	NA	NA	NA	NA	NA	NA	NA
chr1_110488200_110488800	0.183238	0.0243785	0.00538051	-0.173455	-3.97452	-4.86636	0.128371	1.70747	1.66563	NA	NA	NA	NA	NA	NA	NA
chr1_110488800_110489400	0.163085	0.0204922	0.0021617	-0.173942	-4.02544	-5.31752	0.122714	1.67718	1.63624	NA	NA	NA	NA	NA	NA	NA
chr1_110489400_110490000	0.0925538	0.842853	1.5056e-05	-0.194696	0.267932	-6.24332	0.113339	1.34391	1.29025	0.587931	0.00153642	6.51125	1.86302	3.495	0.00228136	0.00229839
chr1_110490000_110490600	0.634862	0.358741	0.0616474	-0.0596273	-1.2562	-2.51556	0.124724	1.35506	1.31322	NA	NA	NA	NA	NA	NA	NA
chr1_110490600_110491200	0.980959	0.00838713	0.0414592	-0.00307176	-4.20676	-3.07568	0.128005	1.52713	1.46626	NA	NA	NA	NA	NA	NA	NA
chr1_110491200_110491800	0.865689	0.0196231	0.0122363	0.0218404	-3.7896	-3.97473	0.128409	1.56725	1.52399	NA	NA	NA	NA	NA	NA	NA
chr1_110493000_110493600	0.433024	0.000354241	0.00011068	-0.0810343	-7.46292	-7.83144	0.10245	1.93443	1.85219	NA	NA	NA	NA	NA	NA	NA
chr1_110493600_110494200	0.529961	0.00105985	0.000493005	-0.0695282	-6.45073	-6.62716	0.109864	1.84558	1.76717	NA	NA	NA	NA	NA	NA	NA
chr1_110496000_110496600	0.393629	0.203067	0.000867571	0.110058	-2.55224	-6.90207	0.127806	1.97657	1.93732	NA	NA	NA	NA	NA	NA	NA
chr1_110496600_110497200	0.367987	0.293792	0.00268483	0.12679	-2.26373	-6.63028	0.139454	2.13164	2.08931	NA	NA	NA	NA	NA	NA	NA
chr1_110508000_110508600	0.85437	0.0774886	0.000973768	-0.0226043	-3.17365	-6.03561	0.122463	1.75745	1.71279	NA	NA	NA	NA	NA	NA	NA
chr1_110508600_110509200	0.507997	0.140557	0.00591129	0.0888825	-2.75132	-5.16152	0.133223	1.83475	1.78804	NA	NA	NA	NA	NA	NA	NA
chr1_110517600_110518200	0.461551	0.00905647	0.000143852	0.0828235	-5.29552	-7.84858	0.111545	1.94314	1.8931	NA	NA	NA	NA	NA	NA	NA
chr1_11052000_11052600	0.668192	0.0980672	0.00017947	-0.0497541	-3.0692	-7.26206	0.115332	1.81762	1.7817	NA	NA	NA	NA	NA	NA	NA
chr1_110524800_110525400	0.918412	0.0845216	0.000136751	0.0121556	-3.35979	-7.7708	0.118018	1.9056	1.86716	NA	NA	NA	NA	NA	NA	NA
chr1_110525400_110526000	0.88828	0.199109	0.00121005	0.0192795	-2.76828	-7.18338	0.13648	2.12479	2.082	NA	NA	NA	NA	NA	NA	NA
chr1_11052600_11053200	0.25433	0.48161	0.330862	-0.130503	-0.797719	-1.078	0.113056	1.12438	1.0969	NA	NA	NA	NA	NA	NA	NA
chr1_110529600_110530200	0.0337142	0.207298	0.0176551	-0.314511	-2.60829	-4.88739	0.143683	2.03926	1.98573	NA	NA	NA	NA	NA	NA	NA
chr1_110530200_110530800	0.894575	0.12851	0.000696603	-0.0170763	-3.14997	-7.25003	0.12815	2.03506	1.99396	NA	NA	NA	NA	NA	NA	NA
chr1_11053200_11053800	0.329018	0.330675	0.287626	-0.110085	-1.12285	-1.19803	0.111585	1.14209	1.11362	NA	NA	NA	NA	NA	NA	NA
chr1_110535000_110535600	0.970788	0.523039	0.00125626	0.00478679	-1.23841	-6.45581	0.130007	1.92423	1.87807	NA	NA	NA	NA	NA	NA	NA
chr1_110535600_110536200	0.458767	0.450096	0.000209007	0.0911725	-1.38397	-7.12289	0.122025	1.81683	1.76857	NA	NA	NA	NA	NA	NA	NA
chr1_11053800_11054400	0.768443	0.0100006	0.000523742	-0.0336472	-5.32095	-7.22848	0.113613	1.98029	1.93778	NA	NA	NA	NA	NA	NA	NA
chr1_110538000_110538600	0.460067	0.00346436	0.234764	-0.105288	-5.00987	-1.89704	0.141329	1.62534	1.57567	NA	NA	NA	NA	NA	NA	NA
chr1_11054400_11055000	0.522008	0.521359	1.70263e-06	-0.0688318	-1.01384	-8.38965	0.106685	1.56893	1.52979	NA	NA	NA	NA	NA	NA	NA
chr1_110547600_110548200	0.59476	0.170938	0.00893838	-0.079583	-3.21916	-6.05352	0.148564	2.3144	2.21718	NA	NA	NA	NA	NA	NA	NA
chr1_110548200_110548800	0.132721	0.0883514	0.00364321	-0.215449	-3.93384	-6.63234	0.140763	2.25942	2.16446	NA	NA	NA	NA	NA	NA	NA
chr1_11055000_11055600	0.336389	0.155957	1.32354e-06	-0.097308	-2.27995	-8.56224	0.100165	1.58065	1.54057	NA	NA	NA	NA	NA	NA	NA
chr1_110555400_110556000	0.515609	0.00286159	0.587989	0.0906072	-5.55828	-0.938233	0.138292	1.7641	1.71969	NA	NA	NA	NA	NA	NA	NA
chr1_11055600_11056200	0.515817	0.053454	2.49811e-06	0.0631428	-3.3047	-8.73499	0.0964215	1.66724	1.62608	NA	NA	NA	NA	NA	NA	NA
chr1_110558400_110559000	0.496714	0.368502	0.00761132	-0.0931724	-1.75596	-5.2451	0.135997	1.93343	1.87886	NA	NA	NA	NA	NA	NA	NA
chr1_11056200_11056800	0.31827	0.0941016	1.27214e-05	0.106224	-2.96533	-8.27721	0.105281	1.73465	1.69289	NA	NA	NA	NA	NA	NA	NA
chr1_11057400_11058000	0.997533	0.000319551	0.000882564	-0.000357923	-7.71562	-6.75301	0.115139	1.9828	1.89854	NA	NA	NA	NA	NA	NA	NA
chr1_110582400_110583000	0.14199	0.314768	0.00544043	0.222441	-2.37333	-6.60768	0.148885	2.33511	2.26481	NA	NA	NA	NA	NA	NA	NA
chr1_11058600_11059200	0.590144	0.00234992	0.00105836	-0.0585319	-4.95467	-5.25245	0.107908	1.53847	1.50254	NA	NA	NA	NA	NA	NA	NA
chr1_11059200_11059800	0.186375	0.136169	0.000382217	-0.156267	-2.37914	-5.86593	0.116496	1.56857	1.53027	NA	NA	NA	NA	NA	NA	NA
chr1_110601000_110601600	0.365667	0.140097	0.00043798	-0.10552	-2.68858	-6.64761	0.115494	1.79077	1.7545	NA	NA	NA	NA	NA	NA	NA
chr1_110602200_110602800	0.070266	0.00837292	2.88156e-05	0.196912	-5.22135	-8.43879	0.106253	1.895	1.8176	NA	NA	NA	NA	NA	NA	NA
chr1_110602800_110603400	0.0599889	0.00982939	3.93398e-05	0.20976	-5.32387	-8.63058	0.108774	1.97646	1.89768	NA	NA	NA	NA	NA	NA	NA
chr1_110603400_110604000	0.00678453	0.00843694	3.93428e-05	0.299085	-5.19131	-8.32012	0.105494	1.88609	1.82942	NA	NA	NA	NA	NA	NA	NA
chr1_11060400_11061000	0.308346	0.0143486	0.0261559	-0.134131	-4.12754	-3.63934	0.130211	1.62188	1.58368	NA	NA	NA	NA	NA	NA	NA
chr1_110604000_110604600	0.199532	0.10103	2.07193e-05	0.1402	-2.86667	-7.9095	0.107713	1.71306	1.66772	NA	NA	NA	NA	NA	NA	NA
chr1_110604600_110605200	0.309559	0.178998	0.00059655	-0.133404	-2.76772	-7.31539	0.129834	2.02814	1.9839	NA	NA	NA	NA	NA	NA	NA
chr1_110605200_110605800	0.106248	0.290489	2.77707e-06	0.182563	1.46182	-7.12893	0.110806	1.36702	1.33483	0.227795	0.00115777	8.59075	1.91063	4.49628	0.000220674	0.000603622
chr1_110605800_110606400	0.0710186	0.643788	0.00295532	0.24049	-0.723025	-4.76278	0.130127	1.55331	1.51715	NA	NA	NA	NA	NA	NA	NA
chr1_110606400_110607000	0.600926	0.113577	0.185632	0.0752966	-2.69337	-2.19082	0.142957	1.66976	1.63043	NA	NA	NA	NA	NA	NA	NA
chr1_110607000_110607600	0.468169	0.0305235	0.0161592	0.0921933	-3.36044	-3.6689	0.126029	1.50556	1.46922	NA	NA	NA	NA	NA	NA	NA
chr1_110607600_110608200	0.828604	0.155078	2.93512e-05	-0.0241378	-2.17335	-6.80839	0.110863	1.50347	1.4682	NA	NA	NA	NA	NA	NA	NA
chr1_110608200_110608800	0.315109	0.0240145	0.000112349	-0.109749	-3.59725	-6.35331	0.108058	1.5412	1.50426	NA	NA	NA	NA	NA	NA	NA
chr1_110616000_110616600	0.220958	0.0680695	0.475244	0.18467	2.43951	-0.915302	0.148828	1.30561	1.27148	0.0562541	0.126191	3.35481	1.82244	1.84084	0.0805306	0.0210721
chr1_110616600_110617200	0.609938	0.0153758	0.980464	0.077572	3.21707	-0.0306457	0.151014	1.27804	1.24469	0.0173238	0.284266	3.24771	1.78399	1.82048	0.0836844	0.0216352
chr1_11062800_11063400	0.127095	0.559499	0.00585579	0.210432	-1.02658	-4.9204	0.135435	1.74629	1.70244	NA	NA	NA	NA	NA	NA	NA
chr1_110631000_110631600	0.0726834	0.428406	0.000158001	0.195682	-1.0681	-5.29762	0.106527	1.33683	1.287	NA	NA	NA	NA	NA	NA	NA
chr1_110631600_110632200	0.0746072	0.298163	0.000283185	0.216053	-1.52473	-5.46787	0.118432	1.44897	1.39123	NA	NA	NA	NA	NA	NA	NA
chr1_11063400_11064000	0.0995244	0.15258	0.00620076	0.218293	-2.68328	-5.15445	0.129853	1.84474	1.7967	NA	NA	NA	NA	NA	NA	NA
chr1_110635800_110636400	0.719533	0.135924	0.00720531	0.0484847	-2.8327	-5.11467	0.134197	1.86641	1.81861	NA	NA	NA	NA	NA	NA	NA
chr1_110673000_110673600	0.543572	0.0290417	0.000320368	0.0679343	-3.80729	-6.40272	0.11101	1.68957	1.64575	NA	NA	NA	NA	NA	NA	NA
chr1_110673600_110674200	0.511104	0.0289707	0.000148845	-0.0724741	-3.50923	-6.27693	0.109433	1.55657	1.51796	NA	NA	NA	NA	NA	NA	NA
chr1_110674200_110674800	0.481068	0.00551367	0.0732895	-0.0939511	-4.94956	-3.03759	0.132259	1.69937	1.65724	NA	NA	NA	NA	NA	NA	NA
chr1_110674800_110675400	0.0969979	0.00466871	0.848045	-0.23937	-4.8748	-0.30843	0.141293	1.63917	1.6006	NA	NA	NA	NA	NA	NA	NA
chr1_110675400_110676000	0.772109	0.00590855	0.0255049	0.0375017	-4.97066	-3.87697	0.128726	1.72182	1.6793	NA	NA	NA	NA	NA	NA	NA
chr1_11067600_11068200	0.789044	0.00319311	2.14846e-05	0.0267759	-5.66528	-8.32686	0.0994957	1.82068	1.75978	NA	NA	NA	NA	NA	NA	NA
chr1_11068200_11068800	0.971495	0.00177899	4.68741e-06	0.00337858	-5.95388	-8.95497	0.0940384	1.79453	1.72663	NA	NA	NA	NA	NA	NA	NA
chr1_11068800_11069400	0.754086	0.0272	0.000222985	-0.0356579	-4.14897	-7.09389	0.113152	1.81861	1.77045	NA	NA	NA	NA	NA	NA	NA
chr1_110751000_110751600	0.978948	0.782061	1.16121e-08	0.00238337	-0.372653	-9.05354	0.0898309	1.33924	1.30655	NA	NA	NA	NA	NA	NA	NA
chr1_110751600_110752200	0.938113	0.943286	3.79573e-08	0.00740487	-0.0977687	-8.78368	0.0948523	1.36683	1.33348	NA	NA	NA	NA	NA	NA	NA
chr1_110777400_110778000	0.559367	0.0262887	0.0172439	-0.0749019	-4.49021	-4.73485	0.127371	1.95578	1.91629	NA	NA	NA	NA	NA	NA	NA
chr1_110778000_110778600	0.308491	0.181512	0.0685612	-0.153533	-2.82383	-3.78757	0.149092	2.08147	2.03083	NA	NA	NA	NA	NA	NA	NA
chr1_110780400_110781000	0.391843	0.00127505	7.3744e-05	-0.0845067	-6.17419	-7.64477	0.0977615	1.7988	1.75554	NA	NA	NA	NA	NA	NA	NA
chr1_110781000_110781600	0.18971	0.000392113	0.000239457	-0.138706	-6.96698	-6.9484	0.104203	1.82146	1.74405	NA	NA	NA	NA	NA	NA	NA
chr1_11080800_11081400	0.16472	0.0234374	0.000181846	0.169074	-4.83111	-8.05594	0.119753	2.06083	1.97849	NA	NA	NA	NA	NA	NA	NA
chr1_110848200_110848800	0.860499	0.051412	5.00603e-05	0.0191204	-3.47789	-7.59845	0.108193	1.73886	1.6983	NA	NA	NA	NA	NA	NA	NA
chr1_110848800_110849400	0.967129	0.0497541	5.22631e-05	0.00450188	-3.5333	-7.63925	0.108653	1.75338	1.71249	NA	NA	NA	NA	NA	NA	NA
chr1_110872200_110872800	0.220846	0.0230766	0.00724586	0.158627	-3.93584	-4.59548	0.127808	1.67429	1.63524	NA	NA	NA	NA	NA	NA	NA
chr1_110872800_110873400	0.169749	0.00235219	0.0177511	0.173522	-5.4493	-4.06353	0.124399	1.69224	1.65248	NA	NA	NA	NA	NA	NA	NA
chr1_110874600_110875200	0.117624	0.0303526	0.0646228	0.23815	-4.3506	-3.59432	0.149337	1.94707	1.89849	NA	NA	NA	NA	NA	NA	NA
chr1_110879400_110880000	0.170873	0.379467	0.2234	0.21562	-1.24732	1.68484	0.154995	1.40556	1.36514	0.298681	0.0545239	-2.93216	1.95939	-1.49647	0.150147	0.0335231
chr1_110916600_110917200	0.12823	0.32022	0.00116023	0.201174	-1.9792	-6.68611	0.129872	1.96963	1.92987	NA	NA	NA	NA	NA	NA	NA
chr1_110962800_110963400	0.16849	0.000429835	0.0112393	-0.174073	-8.00548	-5.36064	0.124418	2.10947	2.02941	NA	NA	NA	NA	NA	NA	NA
chr1_110963400_110964000	0.0155444	0.680811	1.66688e-05	-0.237042	0.246016	2.81342	0.0943336	0.594267	0.585123	0.508784	0.00156688	-2.56741	0.83398	-3.0785	0.00592669	0.00400388
chr1_110964000_110964600	0.14979	0.152886	9.46428e-09	-0.133906	0.740485	3.51475	0.0914194	0.509468	0.502929	0.118933	0.000850654	-2.77426	0.715888	-3.87528	0.000941615	0.00144182
chr1_110964600_110965200	0.925683	0.0103173	0.00230669	-0.013676	-3.21427	3.78694	0.145816	1.20166	1.1735	0.0133289	0.00726742	-7.00121	1.67961	-4.16835	0.000474568	0.000959515
chr1_11098800_11099400	0.158653	0.0572258	0.00462503	0.185959	-3.78238	-5.62037	0.129781	1.93921	1.88769	NA	NA	NA	NA	NA	NA	NA
chr1_11099400_11100000	0.635813	0.0320158	0.0542078	0.0619306	-3.24872	-2.78667	0.129908	1.46908	1.4105	NA	NA	NA	NA	NA	NA	NA
chr1_1110000_1110600	0.577494	0.0409152	7.55023e-05	-0.0490809	-2.91156	-5.8033	0.0874824	1.38413	1.3349	NA	NA	NA	NA	NA	NA	NA
chr1_11100000_11100600	0.397129	0.000161042	0.0471616	0.0998613	-6.34834	-3.07564	0.116834	1.54452	1.50801	NA	NA	NA	NA	NA	NA	NA
chr1_1110600_1111200	0.805797	0.0968942	0.000102485	-0.0196533	-2.10048	-5.12394	0.0794802	1.23945	1.20499	NA	NA	NA	NA	NA	NA	NA
chr1_1111200_1111800	0.691102	0.00107311	0.0129323	0.0460663	-5.41965	-3.85555	0.115203	1.55245	1.49079	NA	NA	NA	NA	NA	NA	NA
chr1_111139200_111139800	0.414772	0.0493128	1.01276e-05	-0.0815163	-2.91351	-6.98573	0.0990518	1.44289	1.4091	NA	NA	NA	NA	NA	NA	NA
chr1_111139800_111140400	0.120807	0.116099	3.16973e-05	-0.164851	-2.13617	-5.98816	0.104293	1.33382	1.29787	NA	NA	NA	NA	NA	NA	NA
chr1_111140400_111141000	0.57134	0.0146827	0.00702358	-0.0800175	-5.9366	-6.40641	0.140341	2.3412	2.27013	NA	NA	NA	NA	NA	NA	NA
chr1_11114400_11115000	0.787133	0.0495574	0.000340743	-0.0325285	-3.98966	-7.33236	0.11976	1.97807	1.89441	NA	NA	NA	NA	NA	NA	NA
chr1_11115000_11115600	0.248225	0.0219179	0.000317763	0.144385	-4.9505	-7.77914	0.123459	2.08685	1.99819	NA	NA	NA	NA	NA	NA	NA
chr1_1111800_1112400	0.971241	0.00931988	0.481416	0.00530216	-4.34323	-1.09868	0.146273	1.60019	1.54789	NA	NA	NA	NA	NA	NA	NA
chr1_111192600_111193200	0.38354	0.0686646	0.00453912	0.117724	-3.46717	-5.40968	0.133808	1.85976	1.81274	NA	NA	NA	NA	NA	NA	NA
chr1_111199200_111199800	0.00856043	0.312883	0.265432	0.386412	-1.45931	-1.55402	0.140674	1.43017	1.37845	NA	NA	NA	NA	NA	NA	NA
chr1_111199800_111200400	0.672405	0.981405	0.000278864	0.0572395	-0.0200739	3.31126	0.134501	0.856578	0.841451	0.633389	0.0037349	-3.33133	1.20074	-2.77441	0.0116999	0.00597597
chr1_111200400_111201000	0.789517	0.0824424	1.70633e-05	0.026361	1.06665	2.83673	0.09818	0.600786	0.590835	0.0667572	0.00157471	-1.77008	0.842632	-2.10066	0.0485538	0.0148617
chr1_111201000_111201600	0.258176	0.0445008	0.476858	0.146202	-2.80912	-0.942296	0.1277	1.35979	1.3138	NA	NA	NA	NA	NA	NA	NA
chr1_111201600_111202200	0.210999	0.0793249	0.0255759	0.186052	-3.18089	-3.99327	0.14667	1.7727	1.73056	NA	NA	NA	NA	NA	NA	NA
chr1_111204600_111205200	0.364151	0.00141772	0.0221867	0.123495	-4.31169	2.91879	0.134737	1.2696	1.23303	0.00505139	0.0119841	-7.23048	1.76982	-4.08544	0.000576113	0.00107007
chr1_111205200_111205800	0.394378	0.0396801	0.00538431	0.119671	-4.54913	-6.11409	0.139191	2.14866	2.09287	NA	NA	NA	NA	NA	NA	NA
chr1_11121000_11121600	0.0772585	0.10065	0.0017308	0.234851	-3.45132	-6.56341	0.129947	2.06007	1.97259	NA	NA	NA	NA	NA	NA	NA
chr1_111215400_111216000	0.0330607	0.108377	0.0280637	0.32007	-3.32307	-4.48419	0.145656	2.02954	1.9771	NA	NA	NA	NA	NA	NA	NA
chr1_11121600_11122200	0.291206	0.00997243	7.56288e-05	0.112133	-4.75451	-7.52685	0.105018	1.76876	1.73157	NA	NA	NA	NA	NA	NA	NA
chr1_111216000_111216600	0.131344	0.066155	0.0017742	0.190148	-3.31343	-5.69315	0.12378	1.76049	1.71547	NA	NA	NA	NA	NA	NA	NA
chr1_11122200_11122800	0.846182	0.000516773	0.000283621	-0.0215095	-6.84863	-6.90017	0.110255	1.83379	1.75588	NA	NA	NA	NA	NA	NA	NA
chr1_111228000_111228600	0.00224415	0.181482	3.16491e-05	0.356096	-2.36371	-7.85642	0.110018	1.74219	1.70262	NA	NA	NA	NA	NA	NA	NA
chr1_111228600_111229200	0.00234393	0.140965	0.000459531	0.404489	-3.06575	-7.44827	0.125563	2.04658	1.974	NA	NA	NA	NA	NA	NA	NA
chr1_111238200_111238800	0.9578	0.0622175	0.000572031	0.00647694	-3.77752	-7.00479	0.121739	1.9765	1.89255	NA	NA	NA	NA	NA	NA	NA
chr1_111282000_111282600	0.0166214	0.00140813	0.0052312	0.281208	-6.1313	-5.18516	0.113127	1.80416	1.76844	NA	NA	NA	NA	NA	NA	NA
chr1_111282600_111283200	0.0501607	0.000121735	0.00421217	0.216301	-7.52151	-5.17314	0.107537	1.79153	1.71776	NA	NA	NA	NA	NA	NA	NA
chr1_111332400_111333000	0.157722	0.242436	0.00818876	0.227401	-2.94233	-6.67501	0.15834	2.48476	2.41514	NA	NA	NA	NA	NA	NA	NA
chr1_11133600_11134200	0.0698557	0.149405	0.0128072	0.246271	-2.63124	-4.52978	0.132685	1.79464	1.74888	NA	NA	NA	NA	NA	NA	NA
chr1_11134200_11134800	0.172177	0.0985726	0.0647126	0.202789	-2.88382	-3.15915	0.146226	1.71049	1.66922	NA	NA	NA	NA	NA	NA	NA
chr1_111345600_111346200	0.528249	0.020204	7.48077e-06	-0.0608892	-3.81834	-7.80927	0.0958127	1.58702	1.54706	NA	NA	NA	NA	NA	NA	NA
chr1_111346200_111346800	0.100559	0.813415	2.21955e-05	-0.162366	-0.308857	-5.92922	0.0968882	1.3011	1.25568	NA	NA	NA	NA	NA	NA	NA
chr1_111346800_111347400	0.334972	0.281948	1.15012e-06	-0.0969479	-1.51621	-7.59427	0.099499	1.39266	1.3564	NA	NA	NA	NA	NA	NA	NA
chr1_111390600_111391200	0.588533	0.0199628	0.00442972	-0.0702139	-4.90973	-5.97513	0.128884	2.03645	1.99625	NA	NA	NA	NA	NA	NA	NA
chr1_111391200_111391800	0.58007	0.0455	0.0120453	-0.075881	-4.29786	-5.35759	0.136175	2.09059	2.04934	NA	NA	NA	NA	NA	NA	NA
chr1_11142600_11143200	0.562885	0.209442	0.00172186	0.0812001	-2.86399	-7.30167	0.139332	2.24995	2.19328	NA	NA	NA	NA	NA	NA	NA
chr1_111426600_111427200	0.710066	0.128115	0.000624371	-0.0445074	-2.56766	-5.93193	0.11898	1.6571	1.61531	NA	NA	NA	NA	NA	NA	NA
chr1_111427200_111427800	0.549504	0.38028	0.000286902	-0.0741276	-1.4228	-6.15524	0.122942	1.60606	1.5678	NA	NA	NA	NA	NA	NA	NA
chr1_11143200_11143800	0.16079	0.0365937	0.00867654	0.188684	-3.71052	-4.6137	0.132373	1.72341	1.68279	NA	NA	NA	NA	NA	NA	NA
chr1_111448200_111448800	0.580252	0.0105321	0.0005288	-0.0617877	-4.43611	-6.04418	0.110937	1.66343	1.62167	NA	NA	NA	NA	NA	NA	NA
chr1_111448800_111449400	0.437556	0.0544599	0.00157363	-0.0787806	-2.56171	-4.19972	0.100596	1.29805	1.24984	NA	NA	NA	NA	NA	NA	NA
chr1_111449400_111450000	0.589216	0.0253629	0.00633867	-0.0573238	-3.03645	-3.61857	0.105417	1.31389	1.26496	NA	NA	NA	NA	NA	NA	NA
chr1_111450000_111450600	0.739116	0.000222608	0.000846082	0.0366354	-7.35051	-6.272	0.109346	1.83425	1.75632	NA	NA	NA	NA	NA	NA	NA
chr1_11145600_11146200	0.718833	0.0135541	0.00291513	0.0451436	-5.09033	-6.06702	0.124624	1.98251	1.92961	NA	NA	NA	NA	NA	NA	NA
chr1_111467400_111468000	0.811947	0.250434	0.491686	0.0347406	-1.63314	0.936637	0.145185	1.40307	1.35123	0.195302	0.131384	-2.56978	1.94793	-1.31923	0.201996	0.0427448
chr1_111475800_111476400	0.0176055	0.2534	0.000962651	0.308299	-2.2696	-6.74452	0.125202	1.96228	1.91186	NA	NA	NA	NA	NA	NA	NA
chr1_1114800_1115400	0.84221	0.0540163	0.00146831	-0.0246005	-3.1932	-5.3371	0.122882	1.61493	1.57713	NA	NA	NA	NA	NA	NA	NA
chr1_111502800_111503400	0.239842	0.0202951	0.00894238	0.152735	-3.94695	-4.37743	0.128263	1.64175	1.60339	NA	NA	NA	NA	NA	NA	NA
chr1_111503400_111504000	0.246594	0.0123914	0.00457695	0.143816	-4.13726	-4.59019	0.122543	1.58934	1.5397	NA	NA	NA	NA	NA	NA	NA
chr1_111504000_111504600	0.554991	0.0202612	7.29848e-05	0.0612793	-3.62714	-6.4186	0.103051	1.50829	1.47288	NA	NA	NA	NA	NA	NA	NA
chr1_111507000_111507600	0.379734	0.371003	0.0336281	0.125792	-1.40492	-3.29077	0.14183	1.5551	1.50261	NA	NA	NA	NA	NA	NA	NA
chr1_111507600_111508200	0.303475	0.118599	0.00639468	0.134343	-2.38395	-4.11387	0.129095	1.49899	1.43976	NA	NA	NA	NA	NA	NA	NA
chr1_111509400_111510000	0.0214448	0.00151024	0.711805	0.344708	-6.16954	-0.662603	0.144756	1.82835	1.78252	NA	NA	NA	NA	NA	NA	NA
chr1_111516600_111517200	0.560155	0.0500448	0.00393957	0.0805997	-4.33684	-6.26452	0.137337	2.15499	2.06349	NA	NA	NA	NA	NA	NA	NA
chr1_111535800_111536400	0.137936	0.000456643	0.0124258	0.17846	-7.33986	-4.85474	0.118203	1.9442	1.86574	NA	NA	NA	NA	NA	NA	NA
chr1_111565200_111565800	0.189788	0.0519383	0.00982231	0.182772	-4.20395	-5.53906	0.137332	2.10681	2.05614	NA	NA	NA	NA	NA	NA	NA
chr1_111592800_111593400	0.948175	0.0940876	0.00250001	-0.0084447	-3.15632	-5.75409	0.129214	1.8463	1.7989	NA	NA	NA	NA	NA	NA	NA
chr1_111619200_111619800	0.912382	0.00239102	0.592883	-0.015159	-4.59732	0.741335	0.13701	1.43022	1.37687	0.00615635	0.163734	-5.33866	1.98528	-2.68912	0.0141097	0.00668646
chr1_111619800_111620400	0.54942	0.381791	0.460669	0.0558058	-0.781669	-0.644843	0.0925355	0.885177	0.866744	NA	NA	NA	NA	NA	NA	NA
chr1_111620400_111621000	0.332643	0.130267	0.0294223	0.0869603	-1.57861	-2.24744	0.0888152	1.02468	0.999829	NA	NA	NA	NA	NA	NA	NA
chr1_1117200_1117800	0.0691927	0.000147457	0.00132381	-0.19457	-7.66662	-6.15831	0.104572	1.8527	1.8009	NA	NA	NA	NA	NA	NA	NA
chr1_111720600_111721200	0.87585	0.0997266	0.000123688	0.0190478	-3.33803	-8.13723	0.121243	1.98687	1.94049	NA	NA	NA	NA	NA	NA	NA
chr1_111721200_111721800	0.57373	0.0959355	0.000177759	0.0672282	-2.6686	-6.24302	0.118649	1.57003	1.53054	NA	NA	NA	NA	NA	NA	NA
chr1_111721800_111722400	0.627248	0.0187552	0.664582	-0.0636715	-3.38452	-0.588634	0.130239	1.38905	1.34882	NA	NA	NA	NA	NA	NA	NA
chr1_111722400_111723000	0.94077	0.0193923	0.564765	0.00983698	-3.43792	-0.798061	0.131671	1.41895	1.37604	NA	NA	NA	NA	NA	NA	NA
chr1_111726600_111727200	0.866132	0.0421314	0.287905	0.02398	-3.14958	-1.55543	0.14146	1.50666	1.44669	NA	NA	NA	NA	NA	NA	NA
chr1_111727200_111727800	0.833048	0.038258	0.255864	0.0306259	-3.31446	-1.71633	0.144466	1.55362	1.49176	NA	NA	NA	NA	NA	NA	NA
chr1_111731400_111732000	0.506069	0.171839	0.0624192	0.0948096	-2.30058	-3.09159	0.141461	1.65755	1.6189	NA	NA	NA	NA	NA	NA	NA
chr1_111732000_111732600	0.429418	0.0664918	0.0159544	0.104223	-2.90847	-3.7696	0.130734	1.54732	1.50644	NA	NA	NA	NA	NA	NA	NA
chr1_111733200_111733800	0.979745	0.00474643	0.0102207	-0.00337106	-6.17959	-5.34027	0.132061	2.08216	1.99375	NA	NA	NA	NA	NA	NA	NA
chr1_111733800_111734400	0.95651	0.00239647	0.01365	0.00654949	-5.56333	-4.32514	0.119447	1.73118	1.68634	NA	NA	NA	NA	NA	NA	NA
chr1_111738000_111738600	0.72191	0.119681	0.0375821	-0.0548769	-3.61065	-4.75631	0.153247	2.27716	2.22127	NA	NA	NA	NA	NA	NA	NA
chr1_111754800_111755400	0.247645	0.00418836	0.559401	0.160139	-4.44009	-0.83183	0.136759	1.47334	1.41466	NA	NA	NA	NA	NA	NA	NA
chr1_111755400_111756000	0.409967	0.00870485	0.885843	-0.122423	-4.15458	0.210363	0.147226	1.51602	1.45717	0.0119072	0.257241	-4.36494	2.10278	-2.0758	0.0510233	0.0153717
chr1_111756000_111756600	0.336702	0.00362986	0.110335	-0.118274	-4.73728	-2.45351	0.121826	1.54534	1.50699	NA	NA	NA	NA	NA	NA	NA
chr1_111756600_111757200	0.372839	0.00151232	0.00335392	0.104348	-6.49802	-5.7173	0.115951	1.92596	1.84787	NA	NA	NA	NA	NA	NA	NA
chr1_1117800_1118400	0.284269	0.000975511	0.000821341	-0.114841	-6.58496	-6.52017	0.105999	1.869	1.82075	NA	NA	NA	NA	NA	NA	NA
chr1_111780000_111780600	0.656621	0.0802619	0.000493931	-0.0548975	-3.40031	-6.94312	0.122679	1.90109	1.85173	NA	NA	NA	NA	NA	NA	NA
chr1_111786000_111786600	0.157441	0.19919	0.00196342	0.199511	-2.82583	-6.97855	0.138824	2.16936	2.12535	NA	NA	NA	NA	NA	NA	NA
chr1_111786600_111787200	0.0884139	0.317467	0.00638237	0.270304	-2.47678	-6.79889	0.155282	2.45067	2.37886	NA	NA	NA	NA	NA	NA	NA
chr1_111793800_111794400	0.484199	0.247684	0.00201606	-0.0936308	-2.37964	-6.52208	0.132759	2.03239	1.99193	NA	NA	NA	NA	NA	NA	NA
chr1_111794400_111795000	0.344628	0.1449	0.00051776	0.123629	-3.05092	-7.53094	0.12947	2.05731	2.01682	NA	NA	NA	NA	NA	NA	NA
chr1_111832200_111832800	0.600405	0.0046534	0.00924114	0.0636145	-5.41724	-4.81615	0.120604	1.82084	1.77229	NA	NA	NA	NA	NA	NA	NA
chr1_1118400_1119000	0.167018	0.00639328	4.6001e-05	-0.144888	-5.30697	-8.01933	0.103193	1.85727	1.78204	NA	NA	NA	NA	NA	NA	NA
chr1_111856800_111857400	0.320967	0.146823	0.000698435	0.125359	-2.79634	-6.71725	0.124947	1.89487	1.84787	NA	NA	NA	NA	NA	NA	NA
chr1_111882000_111882600	0.474305	0.0101035	0.00115725	0.0842499	-4.88432	-6.14144	0.116784	1.82048	1.77221	NA	NA	NA	NA	NA	NA	NA
chr1_111886800_111887400	0.0295172	0.457119	0.0115144	0.398122	-2.08114	-7.15632	0.177223	2.77514	2.71896	NA	NA	NA	NA	NA	NA	NA
chr1_11188800_11189400	0.75006	0.203006	6.58554e-05	-0.0383449	-2.4788	-8.20244	0.11965	1.91943	1.86858	NA	NA	NA	NA	NA	NA	NA
chr1_11189400_11190000	0.981763	0.139379	0.000174941	0.00277956	-2.93012	-7.78848	0.120935	1.94804	1.90706	NA	NA	NA	NA	NA	NA	NA
chr1_111903600_111904200	0.906702	0.592232	0.000491815	0.0149387	-0.978189	-6.62405	0.126764	1.81358	1.76597	NA	NA	NA	NA	NA	NA	NA
chr1_111904200_111904800	0.951885	0.106059	0.000184528	-0.00726188	-3.23472	-7.82116	0.119695	1.96221	1.92303	NA	NA	NA	NA	NA	NA	NA
chr1_111904800_111905400	0.988171	0.309566	0.000653803	0.00188309	-1.70683	-5.92579	0.126328	1.66118	1.62037	NA	NA	NA	NA	NA	NA	NA
chr1_111905400_111906000	0.254258	0.220295	0.00731003	0.157077	-2.33118	-5.13104	0.136057	1.87598	1.82798	NA	NA	NA	NA	NA	NA	NA
chr1_111919800_111920400	0.108469	0.296372	0.0077667	-0.233292	-2.24088	-5.76725	0.142519	2.12156	2.07159	NA	NA	NA	NA	NA	NA	NA
chr1_111920400_111921000	0.935846	0.498068	0.000378891	-0.0104999	-1.2477	-6.82965	0.129734	1.82695	1.78036	NA	NA	NA	NA	NA	NA	NA
chr1_111921000_111921600	0.907253	0.206619	0.00142898	-0.0148179	-2.53602	-6.5482	0.126489	1.97975	1.9297	NA	NA	NA	NA	NA	NA	NA
chr1_11193000_11193600	0.510146	0.0527132	0.000100075	-0.0753115	-3.86215	-8.09831	0.113459	1.94216	1.90114	NA	NA	NA	NA	NA	NA	NA
chr1_11193600_11194200	0.390864	0.0720058	0.000230799	-0.103274	-3.66202	-7.78522	0.119224	1.98865	1.94834	NA	NA	NA	NA	NA	NA	NA
chr1_111937200_111937800	0.31498	0.553714	0.0155284	0.165549	-1.45336	-5.99448	0.162955	2.43616	2.38517	NA	NA	NA	NA	NA	NA	NA
chr1_1119600_1120200	0.924056	0.000295211	0.0655735	0.0114878	-7.11072	-3.34275	0.119852	1.81542	1.77211	NA	NA	NA	NA	NA	NA	NA
chr1_111960600_111961200	0.168438	0.144151	0.0109595	-0.196648	-2.99984	-5.21356	0.140536	2.019	1.96639	NA	NA	NA	NA	NA	NA	NA
chr1_111967200_111967800	0.696848	0.137181	0.0013927	-0.0477794	-2.89835	-6.24584	0.121878	1.91594	1.83582	NA	NA	NA	NA	NA	NA	NA
chr1_111976800_111977400	0.759226	0.0420841	0.000129558	-0.0351722	-3.96698	-7.73906	0.114075	1.89722	1.85197	NA	NA	NA	NA	NA	NA	NA
chr1_111977400_111978000	0.815011	0.0162081	1.51687e-05	0.0238565	-4.37313	-8.29201	0.101383	1.75209	1.71443	NA	NA	NA	NA	NA	NA	NA
chr1_111981600_111982200	0.0636435	0.00024494	0.00570332	-0.201323	-5.99577	-4.2693	0.105932	1.50769	1.47216	NA	NA	NA	NA	NA	NA	NA
chr1_111982200_111982800	0.225814	0.0041916	0.0921182	-0.136199	-4.06298	-2.23214	0.110941	1.34833	1.29762	NA	NA	NA	NA	NA	NA	NA
chr1_111982800_111983400	0.755718	0.00650952	0.0213099	0.0406545	-5.43383	-4.42544	0.129899	1.90617	1.85637	NA	NA	NA	NA	NA	NA	NA
chr1_111987600_111988200	0.348929	0.0486219	0.00901148	0.130348	-4.30821	-5.65626	0.137742	2.12682	2.07405	NA	NA	NA	NA	NA	NA	NA
chr1_111988200_111988800	0.823193	0.250071	3.13578e-07	-0.0211877	-1.53781	-7.69954	0.0942854	1.32014	1.28828	NA	NA	NA	NA	NA	NA	NA
chr1_111988800_111989400	0.780095	0.632883	5.02383e-05	-0.0278223	-0.585227	-5.24392	0.0990697	1.217	1.17233	NA	NA	NA	NA	NA	NA	NA
chr1_111990600_111991200	0.864661	0.104446	0.00174323	-0.0244311	-3.741	-7.30991	0.142539	2.25852	2.19858	NA	NA	NA	NA	NA	NA	NA
chr1_112041000_112041600	0.200221	0.252255	0.0016876	-0.165558	-1.88589	-5.29403	0.127394	1.62655	1.58691	NA	NA	NA	NA	NA	NA	NA
chr1_112041600_112042200	0.577899	0.613216	0.000250441	-0.0682104	-0.741467	-5.63883	0.121709	1.45684	1.42047	NA	NA	NA	NA	NA	NA	NA
chr1_112058400_112059000	0.433448	0.158003	0.00725631	-0.117632	-3.38088	-6.33797	0.148858	2.35575	2.25572	NA	NA	NA	NA	NA	NA	NA
chr1_112060800_112061400	0.779383	0.0585552	0.00331468	-0.0356147	-3.02708	-4.69627	0.126396	1.56056	1.51579	NA	NA	NA	NA	NA	NA	NA
chr1_112061400_112062000	0.384672	0.236888	0.0234315	0.131484	-2.05963	-3.9129	0.149807	1.71862	1.66907	NA	NA	NA	NA	NA	NA	NA
chr1_112078800_112079400	0.170063	0.107368	2.78147e-05	0.151747	-2.8476	-7.88	0.10887	1.73402	1.69333	NA	NA	NA	NA	NA	NA	NA
chr1_112079400_112080000	0.10072	0.0955736	2.15861e-05	0.181487	-2.99493	-8.13057	0.108351	1.76004	1.71882	NA	NA	NA	NA	NA	NA	NA
chr1_112093800_112094400	0.761218	0.0357299	0.000102523	0.0352119	-4.56381	-8.65437	0.115187	2.10944	2.03529	NA	NA	NA	NA	NA	NA	NA
chr1_112094400_112095000	0.0426484	0.029301	1.14048e-05	0.211395	-4.39922	-9.43426	0.10139	1.95556	1.91672	NA	NA	NA	NA	NA	NA	NA
chr1_1121400_1122000	0.406716	0.00343643	0.00683959	0.101344	-5.97639	-5.35984	0.121027	1.93708	1.89256	NA	NA	NA	NA	NA	NA	NA
chr1_112230000_112230600	0.199088	0.0686021	6.51845e-06	0.118612	-2.40539	-6.3012	0.0910365	1.28993	1.23827	NA	NA	NA	NA	NA	NA	NA
chr1_112230600_112231200	0.126407	0.0239469	7.24064e-05	0.158629	-3.31899	-6.00662	0.101904	1.42126	1.37756	NA	NA	NA	NA	NA	NA	NA
chr1_1122600_1123200	0.755632	0.00225169	0.0928166	-0.0420368	-6.06981	-3.13782	0.134267	1.87599	1.82815	NA	NA	NA	NA	NA	NA	NA
chr1_112263600_112264200	0.685912	0.0282155	0.000187607	-0.0471158	-4.35889	-7.53585	0.11577	1.92381	1.85527	NA	NA	NA	NA	NA	NA	NA
chr1_112318200_112318800	0.210305	0.324499	0.00896655	0.168646	-1.85816	-4.95639	0.132743	1.86577	1.81615	NA	NA	NA	NA	NA	NA	NA
chr1_112318800_112319400	0.799724	0.432546	0.121788	-0.0401837	1.05892	2.04905	0.157474	1.33738	1.29984	0.339825	0.0306294	-0.990131	1.86499	-0.530905	0.601331	0.108284
chr1_112336800_112337400	0.651473	0.0078949	0.000375125	-0.0533419	-5.30061	-7.01521	0.117316	1.90824	1.82719	NA	NA	NA	NA	NA	NA	NA
chr1_112359000_112359600	0.434353	0.0143358	0.000273802	0.0865783	-4.2004	-6.33835	0.109778	1.65028	1.60828	NA	NA	NA	NA	NA	NA	NA
chr1_112359600_112360200	0.883696	0.0438658	0.0014373	-0.0176094	-3.56882	-5.69186	0.119711	1.72214	1.67832	NA	NA	NA	NA	NA	NA	NA
chr1_112395600_112396200	0.89627	0.000907213	0.00832095	0.0154269	-6.36049	-4.816	0.117675	1.79286	1.74638	NA	NA	NA	NA	NA	NA	NA
chr1_112396200_112396800	0.990729	0.00298013	0.00416306	0.00134739	-5.20833	-4.8823	0.115325	1.66066	1.61889	NA	NA	NA	NA	NA	NA	NA
chr1_1124400_1125000	0.697632	0.065042	0.000497835	-0.0459503	-3.55063	-6.89992	0.117532	1.87846	1.84148	NA	NA	NA	NA	NA	NA	NA
chr1_112456200_112456800	0.653931	0.0377213	0.00703467	0.0630888	-4.64446	-5.96345	0.13981	2.17068	2.11361	NA	NA	NA	NA	NA	NA	NA
chr1_112456800_112457400	0.189521	0.0515793	0.000614734	0.15838	-3.8497	-6.80854	0.118931	1.92619	1.85142	NA	NA	NA	NA	NA	NA	NA
chr1_112464600_112465200	0.519237	0.277475	0.00335911	0.0909627	-2.40984	-6.6109	0.140048	2.19271	2.13707	NA	NA	NA	NA	NA	NA	NA
chr1_112465200_112465800	0.876771	0.0997362	0.000381917	0.0190191	-3.34141	-7.42477	0.121972	1.98894	1.9368	NA	NA	NA	NA	NA	NA	NA
chr1_1125000_1125600	0.888493	0.812772	0.321794	-0.0201118	-0.34068	-1.38024	0.142646	1.43014	1.37809	NA	NA	NA	NA	NA	NA	NA
chr1_112501800_112502400	0.732937	0.0602795	0.00566895	-0.0460267	-3.6678	-5.38642	0.134072	1.90424	1.85593	NA	NA	NA	NA	NA	NA	NA
chr1_112502400_112503000	0.401002	0.239178	0.003356	-0.112219	-2.0127	-5.09556	0.132384	1.6878	1.64704	NA	NA	NA	NA	NA	NA	NA
chr1_112503600_112504200	0.694201	0.0160261	0.0272686	-0.0505218	-3.87574	-3.45054	0.127697	1.54998	1.51318	NA	NA	NA	NA	NA	NA	NA
chr1_112504200_112504800	0.668827	0.0184277	0.0264166	0.0554332	-3.81635	-3.4971	0.128759	1.56166	1.52458	NA	NA	NA	NA	NA	NA	NA
chr1_112504800_112505400	0.294458	0.00851825	0.00227721	0.121495	-4.27079	-4.90199	0.114565	1.55373	1.51691	NA	NA	NA	NA	NA	NA	NA
chr1_112505400_112506000	0.985743	0.0099321	0.000103888	0.00186177	-4.48373	-6.90253	0.103622	1.66705	1.62488	NA	NA	NA	NA	NA	NA	NA
chr1_112507200_112507800	0.471093	0.00536812	0.0464011	-0.0909292	-4.34936	-2.92492	0.125127	1.48824	1.42893	NA	NA	NA	NA	NA	NA	NA
chr1_112507800_112508400	0.03958	0.0267764	0.205023	-0.198377	-2.33868	-1.28331	0.0936487	1.02212	0.998239	NA	NA	NA	NA	NA	NA	NA
chr1_112508400_112509000	0.00361626	0.0845901	0.198107	-0.341746	-2.09965	-1.51213	0.111431	1.19115	1.158	NA	NA	NA	NA	NA	NA	NA
chr1_112509000_112509600	0.708362	0.181599	0.391048	0.0515237	-1.74166	1.07898	0.136891	1.28406	1.24611	0.141521	0.100543	-2.82064	1.7893	-1.57639	0.130621	0.0300941
chr1_112509600_112510200	0.201944	0.0067053	0.531256	0.185627	-4.34792	-0.927524	0.143394	1.53122	1.47026	NA	NA	NA	NA	NA	NA	NA
chr1_112513200_112513800	0.95829	0.00832131	0.000449441	0.00572655	-4.54442	-6.07253	0.1089	1.64791	1.6063	NA	NA	NA	NA	NA	NA	NA
chr1_11259000_11259600	0.385963	0.0789232	0.00601536	0.128857	-4.17426	-6.40682	0.147216	2.32309	2.22445	NA	NA	NA	NA	NA	NA	NA
chr1_112618200_112618800	0.798716	0.0531907	0.308681	-0.0325582	-2.72386	-1.3706	0.126937	1.37262	1.33148	NA	NA	NA	NA	NA	NA	NA
chr1_112618800_112619400	0.905545	0.226957	0.111857	-0.0127037	-1.43047	-1.84584	0.106472	1.16811	1.13873	NA	NA	NA	NA	NA	NA	NA
chr1_112619400_112620000	0.849137	0.0498544	0.212242	-0.0210446	-2.526	-1.54158	0.110012	1.25409	1.21864	NA	NA	NA	NA	NA	NA	NA
chr1_11262000_11262600	0.553384	0.105766	0.0179672	0.0884586	-3.18868	-4.62787	0.148153	1.9326	1.88576	NA	NA	NA	NA	NA	NA	NA
chr1_112620000_112620600	0.377172	0.0187739	0.302702	-0.106087	-3.15074	-1.29781	0.118966	1.29332	1.2451	NA	NA	NA	NA	NA	NA	NA
chr1_11262600_11263200	0.905907	0.0226722	0.0025951	-0.0138955	-3.73264	-4.91889	0.116911	1.58288	1.54416	NA	NA	NA	NA	NA	NA	NA
chr1_112674000_112674600	0.878412	0.000274411	0.207528	-0.0169688	-5.49669	-1.71613	0.110305	1.39497	1.34243	NA	NA	NA	NA	NA	NA	NA
chr1_112674600_112675200	0.413085	0.00153702	0.613924	-0.103716	-4.75837	-0.690313	0.125569	1.41268	1.35905	NA	NA	NA	NA	NA	NA	NA
chr1_1126800_1127400	0.305137	0.0253916	0.0237892	-0.14971	-5.18087	-5.13838	0.144363	2.24225	2.19776	NA	NA	NA	NA	NA	NA	NA
chr1_112689000_112689600	0.138526	0.00758227	0.00354068	0.180552	-5.35888	-5.7287	0.119772	1.91862	1.8633	NA	NA	NA	NA	NA	NA	NA
chr1_112689600_112690200	0.657797	0.0276582	0.00853808	0.0575186	-4.04559	-4.76481	0.129009	1.77885	1.73401	NA	NA	NA	NA	NA	NA	NA
chr1_112696200_112696800	0.450012	0.0532102	0.000199279	0.0883252	-3.57475	-7.09079	0.115929	1.80156	1.75399	NA	NA	NA	NA	NA	NA	NA
chr1_112696800_112697400	0.787846	0.0567561	0.00360358	0.0354812	-3.41351	-5.22732	0.13108	1.74665	1.70374	NA	NA	NA	NA	NA	NA	NA
chr1_112698600_112699200	0.322416	0.139521	0.0079234	0.142583	-2.90336	-5.22558	0.142546	1.93096	1.88216	NA	NA	NA	NA	NA	NA	NA
chr1_112699200_112699800	0.8338	0.237862	0.000825857	-0.0278395	-2.01812	-5.89872	0.131926	1.68754	1.64805	NA	NA	NA	NA	NA	NA	NA
chr1_112699800_112700400	0.183291	0.101581	0.00785349	-0.189087	-3.19206	-5.17718	0.139957	1.91068	1.86247	NA	NA	NA	NA	NA	NA	NA
chr1_112704000_112704600	0.865934	0.0508804	0.00107387	0.0223677	-4.46322	-7.52054	0.131752	2.22619	2.1544	NA	NA	NA	NA	NA	NA	NA
chr1_112704600_112705200	0.842719	0.0434396	6.76386e-05	-0.022097	-3.82794	-7.86171	0.11074	1.84327	1.79434	NA	NA	NA	NA	NA	NA	NA
chr1_112705200_112705800	0.92678	0.0417496	0.000165821	0.0102932	-3.42561	-6.54253	0.111396	1.63552	1.59536	NA	NA	NA	NA	NA	NA	NA
chr1_112705800_112706400	0.808547	0.0211579	0.000996948	0.0292379	-4.42402	-6.34854	0.119975	1.85346	1.80566	NA	NA	NA	NA	NA	NA	NA
chr1_112707600_112708200	0.863231	0.0321305	0.00178922	-0.0223366	-4.37765	-6.39852	0.128942	1.98098	1.92971	NA	NA	NA	NA	NA	NA	NA
chr1_112708200_112708800	0.959328	0.0130789	0.00796847	-0.00646507	-4.32888	-4.54016	0.126085	1.6767	1.63656	NA	NA	NA	NA	NA	NA	NA
chr1_112714200_112714800	0.646432	0.0529206	0.0315416	-0.0602346	-3.01932	-3.28007	0.130447	1.51971	1.47894	NA	NA	NA	NA	NA	NA	NA
chr1_112714800_112715400	0.519194	0.141362	0.0396541	0.0927337	-2.80943	-3.87496	0.14276	1.87738	1.82999	NA	NA	NA	NA	NA	NA	NA
chr1_112715400_112716000	0.387565	0.0525414	0.0429965	-0.128535	-4.33326	-4.41321	0.147349	2.17742	2.12039	NA	NA	NA	NA	NA	NA	NA
chr1_11271600_11272200	0.053609	0.000472682	9.73729e-06	0.171952	-6.10386	-7.84719	0.086809	1.62166	1.57913	NA	NA	NA	NA	NA	NA	NA
chr1_112719000_112719600	0.0355133	0.259308	0.00557548	-0.277272	-1.91141	-4.74487	0.128	1.67354	1.63141	NA	NA	NA	NA	NA	NA	NA
chr1_112719600_112720200	0.0451068	0.295202	0.0447108	-0.288706	-1.62917	-3.06648	0.140167	1.53864	1.4859	NA	NA	NA	NA	NA	NA	NA
chr1_112720200_112720800	0.514039	0.0684127	0.0483322	-0.0937874	-3.22679	-3.42563	0.14261	1.72919	1.68885	NA	NA	NA	NA	NA	NA	NA
chr1_11272200_11272800	0.0554183	0.00783128	5.13553e-07	0.162406	-4.16122	-8.51348	0.0826315	1.4964	1.45941	NA	NA	NA	NA	NA	NA	NA
chr1_11272800_11273400	0.0528162	0.167181	0.00954196	0.24944	-2.07942	-3.85137	0.125493	1.4816	1.42374	NA	NA	NA	NA	NA	NA	NA
chr1_11273400_11274000	0.549569	0.241436	0.0460851	0.0849826	-1.85076	-3.07068	0.140968	1.55958	1.49787	NA	NA	NA	NA	NA	NA	NA
chr1_1127400_1128000	0.715691	0.0304334	0.0226478	-0.0531343	-4.07684	-4.20352	0.144988	1.82548	1.78222	NA	NA	NA	NA	NA	NA	NA
chr1_11274000_11274600	0.877439	0.141499	0.000379828	0.0191472	-2.99707	-7.51859	0.123469	2.00347	1.96037	NA	NA	NA	NA	NA	NA	NA
chr1_112743000_112743600	0.168942	0.00674348	0.000450538	-0.151563	-4.91013	-6.36887	0.108447	1.73051	1.68504	NA	NA	NA	NA	NA	NA	NA
chr1_112743600_112744200	0.179613	0.0328646	0.0171465	-0.175377	-3.37375	-3.64957	0.128699	1.5335	1.47568	NA	NA	NA	NA	NA	NA	NA
chr1_112744200_112744800	0.784952	0.0444656	0.0990229	0.0428848	-3.93627	-3.1325	0.156246	1.90508	1.86055	NA	NA	NA	NA	NA	NA	NA
chr1_112744800_112745400	0.658221	0.128482	0.00176526	-0.0572239	-3.16692	-6.50483	0.128519	2.04587	1.95901	NA	NA	NA	NA	NA	NA	NA
chr1_112747200_112747800	0.534958	0.0134053	7.01012e-05	0.0700042	-5.12003	-8.34886	0.111979	1.99068	1.91034	NA	NA	NA	NA	NA	NA	NA
chr1_112747800_112748400	0.493671	0.00300073	3.04378e-05	-0.0698703	-6.25089	-8.91737	0.101264	1.99464	1.92759	NA	NA	NA	NA	NA	NA	NA
chr1_1128000_1128600	0.720642	0.0729696	0.148061	-0.0424839	-2.40562	-1.86809	0.118076	1.31094	1.26983	NA	NA	NA	NA	NA	NA	NA
chr1_112809000_112809600	0.0306121	0.0320795	0.000314269	0.254399	-4.08027	-7.0262	0.114041	1.84583	1.80313	NA	NA	NA	NA	NA	NA	NA
chr1_112846800_112847400	0.725728	0.00163512	3.29705e-06	0.0321414	-6.27469	-9.49576	0.0910615	1.87473	1.79497	NA	NA	NA	NA	NA	NA	NA
chr1_112847400_112848000	0.581233	0.00128412	2.23613e-06	0.0493607	-6.36735	-9.60565	0.0888556	1.85638	1.7774	NA	NA	NA	NA	NA	NA	NA
chr1_112849800_112850400	0.477568	0.11122	0.00420396	-0.0645114	-1.88415	-3.40143	0.0900912	1.16023	1.12919	NA	NA	NA	NA	NA	NA	NA
chr1_112850400_112851000	0.129777	0.189029	0.00010103	-0.138835	-1.66983	-5.16097	0.0900005	1.25249	1.21242	NA	NA	NA	NA	NA	NA	NA
chr1_112851000_112851600	0.875237	0.00653286	0.00023603	0.0175555	-5.40296	-7.40564	0.111191	1.89624	1.85667	NA	NA	NA	NA	NA	NA	NA
chr1_11285400_11286000	0.792882	0.0275092	0.00123095	0.0314985	-4.04657	-5.96626	0.119268	1.77748	1.73216	NA	NA	NA	NA	NA	NA	NA
chr1_1128600_1129200	0.253203	0.0512862	0.0425762	-0.14829	-2.98854	-2.99285	0.128156	1.49336	1.43492	NA	NA	NA	NA	NA	NA	NA
chr1_1129200_1129800	0.0957381	0.0842461	0.00464266	-0.222479	-3.11514	-5.12208	0.130812	1.76522	1.72114	NA	NA	NA	NA	NA	NA	NA
chr1_112923000_112923600	0.731684	0.0185589	0.00101304	-0.0404877	-4.29085	-6.01248	0.117364	1.75791	1.71271	NA	NA	NA	NA	NA	NA	NA
chr1_112955400_112956000	0.288782	0.0822952	0.0408422	-0.114344	-2.20834	-2.53233	0.106546	1.24322	1.20339	NA	NA	NA	NA	NA	NA	NA
chr1_112956000_112956600	0.274949	0.0297473	0.890033	-0.143868	-3.07987	-0.185751	0.130209	1.37304	1.33604	NA	NA	NA	NA	NA	NA	NA
chr1_112956600_112957200	0.218119	0.11825	0.76085	-0.0954839	-1.13941	-0.214644	0.0764715	0.715743	0.701043	NA	NA	NA	NA	NA	NA	NA
chr1_112957200_112957800	0.841722	0.00191323	0.000292278	-0.020412	-4.81726	-5.54967	0.101642	1.4631	1.41571	NA	NA	NA	NA	NA	NA	NA
chr1_112983600_112984200	0.0593159	0.115968	0.000491612	0.23948	-3.1472	-7.20941	0.123846	1.96437	1.92195	NA	NA	NA	NA	NA	NA	NA
chr1_11298600_11299200	0.163025	0.0228378	0.00429137	0.183594	-4.4698	-5.5565	0.129504	1.89792	1.84923	NA	NA	NA	NA	NA	NA	NA
chr1_11299200_11299800	0.0786444	0.0233827	0.000291742	0.213114	-4.70214	-7.68545	0.118489	2.00498	1.96025	NA	NA	NA	NA	NA	NA	NA
chr1_1130400_1131000	0.698272	0.0280551	0.00790834	-0.050919	-3.81549	-4.56265	0.130532	1.68217	1.64296	NA	NA	NA	NA	NA	NA	NA
chr1_11304000_11304600	0.290167	0.0191668	0.00201308	0.124619	-4.39951	-5.81759	0.116458	1.81224	1.7765	NA	NA	NA	NA	NA	NA	NA
chr1_11304600_11305200	0.197975	0.0148577	0.0442755	0.194217	-5.66696	-4.43418	0.148688	2.23905	2.14406	NA	NA	NA	NA	NA	NA	NA
chr1_113071800_113072400	0.534296	0.174366	0.120003	0.0985283	-2.62965	-2.94742	0.15735	1.90604	1.86053	NA	NA	NA	NA	NA	NA	NA
chr1_113072400_113073000	0.968707	0.0202553	0.00286449	-0.00470474	-3.83286	-4.90174	0.119277	1.59375	1.5559	NA	NA	NA	NA	NA	NA	NA
chr1_113073000_113073600	0.502657	0.230386	0.000277898	-0.0757939	-1.70892	-5.31383	0.112183	1.40597	1.34996	NA	NA	NA	NA	NA	NA	NA
chr1_113073600_113074200	0.785392	0.106079	0.00510413	0.0358543	-2.59235	-4.47758	0.130906	1.57263	1.5224	NA	NA	NA	NA	NA	NA	NA
chr1_1131000_1131600	0.226091	0.00503246	0.0108109	-0.153115	-4.96657	-4.36779	0.124795	1.68567	1.64409	NA	NA	NA	NA	NA	NA	NA
chr1_11311800_11312400	0.469687	0.0610605	0.000233487	-0.0861542	-3.68025	-7.49285	0.118179	1.91673	1.87691	NA	NA	NA	NA	NA	NA	NA
chr1_1131600_1132200	0.491518	0.0218157	0.000501923	-0.078651	-3.83297	-5.90058	0.113421	1.61444	1.5759	NA	NA	NA	NA	NA	NA	NA
chr1_11316000_11316600	0.838885	0.270815	0.000802289	0.0246892	-1.85555	-5.82263	0.120745	1.66478	1.6224	NA	NA	NA	NA	NA	NA	NA
chr1_11316600_11317200	0.44088	0.189044	0.000255167	0.0909933	-2.04649	-5.94012	0.117043	1.53507	1.49863	NA	NA	NA	NA	NA	NA	NA
chr1_113168400_113169000	0.285672	0.139682	0.00610236	-0.149377	-3.2122	-5.8834	0.138283	2.13725	2.04652	NA	NA	NA	NA	NA	NA	NA
chr1_113169000_113169600	0.929211	0.0695622	0.00198403	-0.0121114	-4.06906	-6.87754	0.135587	2.18993	2.09692	NA	NA	NA	NA	NA	NA	NA
chr1_11317200_11317800	0.31097	0.0157752	0.00395798	0.129665	-5.11577	-5.96242	0.126568	2.0407	1.96508	NA	NA	NA	NA	NA	NA	NA
chr1_113176800_113177400	0.290503	0.65113	3.39583e-07	0.10544	-0.608259	-7.65386	0.0986048	1.33634	1.2856	NA	NA	NA	NA	NA	NA	NA
chr1_113177400_113178000	0.298545	0.950906	4.20235e-05	0.0841844	0.0653089	-4.66516	0.0800655	1.05497	1.03034	0.625779	0.00196579	4.73047	1.47464	3.20789	0.00441596	0.00335676
chr1_113178000_113178600	0.568695	0.79278	1.27793e-05	0.0488145	0.298706	-5.37103	0.0850277	1.13046	1.09881	0.56563	0.00147219	5.66974	1.57649	3.59642	0.00180328	0.0020434
chr1_113191200_113191800	0.0210911	0.12419	0.00083082	0.286023	-2.93063	-6.46707	0.119765	1.87136	1.80786	NA	NA	NA	NA	NA	NA	NA
chr1_113191800_113192400	0.268867	0.331319	0.00505554	0.159479	-2.11788	-6.22284	0.142495	2.15708	2.11326	NA	NA	NA	NA	NA	NA	NA
chr1_11319600_11320200	0.379449	0.0404809	0.000984609	0.115904	-4.49622	-7.18824	0.130602	2.13263	2.04205	NA	NA	NA	NA	NA	NA	NA
chr1_11320200_11320800	0.249353	0.10599	0.00133529	-0.154351	-3.50058	-7.07602	0.1323	2.12305	2.07106	NA	NA	NA	NA	NA	NA	NA
chr1_113206200_113206800	0.0218931	0.0060753	2.3878e-05	0.275832	2.06852	3.31613	0.116252	0.719114	0.705587	0.00967041	0.00168931	-1.24761	1.00746	-1.23837	0.22992	0.0476249
chr1_113206800_113207400	0.341857	0.0101411	2.55856e-05	0.117047	1.92131	3.29444	0.121869	0.716493	0.704107	0.0131734	0.00171309	-1.37313	1.00455	-1.36691	0.186824	0.0400938
chr1_113207400_113208000	0.765659	0.706457	0.568461	-0.0415197	0.491463	-0.723576	0.138478	1.29685	1.2596	0.523561	0.155762	1.21504	1.80788	0.672081	0.509222	0.0930867
chr1_11321400_11322000	0.0738232	0.0842401	0.00106534	0.223805	-3.4734	-6.61471	0.122338	1.96819	1.89344	NA	NA	NA	NA	NA	NA	NA
chr1_1132200_1132800	0.451414	0.503211	4.06479e-05	-0.0789571	-0.872803	-5.63863	0.103956	1.29352	1.24254	NA	NA	NA	NA	NA	NA	NA
chr1_11323200_11323800	0.561476	0.258195	0.0225665	-0.0903536	-2.66874	-5.3142	0.154478	2.3311	2.2517	NA	NA	NA	NA	NA	NA	NA
chr1_11323800_11324400	0.205026	0.0327439	0.0037085	0.16833	-4.25873	-5.76169	0.130938	1.93435	1.88427	NA	NA	NA	NA	NA	NA	NA
chr1_11324400_11325000	0.438018	0.490158	3.94318e-07	0.0761859	-0.940693	-7.75473	0.0973812	1.35229	1.31209	NA	NA	NA	NA	NA	NA	NA
chr1_11325000_11325600	0.954943	0.0392649	9.5806e-06	-0.00568173	-3.33147	-7.61526	0.100013	1.57007	1.53097	NA	NA	NA	NA	NA	NA	NA
chr1_11326800_11327400	0.930097	0.00823166	8.36027e-05	-0.00899272	-4.53	-6.90108	0.101954	1.64022	1.59906	NA	NA	NA	NA	NA	NA	NA
chr1_11327400_11328000	0.415287	0.0317612	0.000162713	0.0919592	-3.9481	-7.13192	0.111866	1.78256	1.73654	NA	NA	NA	NA	NA	NA	NA
chr1_1132800_1133400	0.693622	0.692674	0.0485191	0.0460913	0.472884	-2.34501	0.116267	1.18898	1.1571	0.515331	0.0163774	2.81789	1.65908	1.69846	0.104925	0.0254699
chr1_11330400_11331000	0.897012	0.103024	0.00473467	-0.0189857	-3.87718	-6.62918	0.145871	2.33084	2.23296	NA	NA	NA	NA	NA	NA	NA
chr1_1133400_1134000	0.836335	0.474224	0.0635131	-0.0315862	-1.16784	-2.95498	0.152034	1.61853	1.55405	NA	NA	NA	NA	NA	NA	NA
chr1_11334000_11334600	0.477093	0.00482543	0.000150296	-0.078107	-5.62138	-7.53044	0.10896	1.89795	1.82244	NA	NA	NA	NA	NA	NA	NA
chr1_11334600_11335200	0.715169	0.58405	1.18556e-05	0.0373641	-0.690812	-5.90693	0.10176	1.25291	1.20292	NA	NA	NA	NA	NA	NA	NA
chr1_11335200_11335800	0.3448	0.69765	4.00296e-07	0.0927947	-0.503425	-7.31198	0.0972144	1.28775	1.2381	NA	NA	NA	NA	NA	NA	NA
chr1_11335800_11336400	0.139257	0.116269	8.44225e-05	0.17313	-2.69785	-7.08682	0.115066	1.68533	1.64325	NA	NA	NA	NA	NA	NA	NA
chr1_11338800_11339400	0.731234	0.0162895	0.0241768	0.0416669	-3.7734	-3.44231	0.120571	1.51304	1.47661	NA	NA	NA	NA	NA	NA	NA
chr1_113389800_113390400	0.10217	0.1082	0.0288816	0.24879	-3.50077	-4.69479	0.149183	2.13695	2.08123	NA	NA	NA	NA	NA	NA	NA
chr1_11339400_11340000	0.726816	0.0103833	0.015321	-0.0402943	-3.85739	-3.54846	0.114635	1.44343	1.40888	NA	NA	NA	NA	NA	NA	NA
chr1_1134000_1134600	0.311152	0.00838374	0.00379565	0.125617	-5.1275	-5.52938	0.122664	1.86128	1.81328	NA	NA	NA	NA	NA	NA	NA
chr1_1134600_1135200	0.519136	0.0827129	0.144913	0.0799826	-2.40906	-1.94998	0.123113	1.35813	1.31496	NA	NA	NA	NA	NA	NA	NA
chr1_1135200_1135800	0.954494	0.045835	0.143803	0.00798583	-3.12335	-2.17408	0.139183	1.52174	1.46194	NA	NA	NA	NA	NA	NA	NA
chr1_113656800_113657400	0.0589758	0.00246252	0.00611278	0.225437	-4.86492	-4.23966	0.116422	1.51838	1.47508	NA	NA	NA	NA	NA	NA	NA
chr1_113657400_113658000	0.0157227	0.00532184	0.000570725	0.25781	-4.33926	-5.27254	0.102786	1.48315	1.42424	NA	NA	NA	NA	NA	NA	NA
chr1_113658000_113658600	0.0171524	0.00702791	0.000118182	0.257795	-5.1184	-7.43224	0.104243	1.81386	1.76635	NA	NA	NA	NA	NA	NA	NA
chr1_113758800_113759400	0.255855	0.318511	0.0178761	0.169917	-2.04831	-4.85979	0.147681	2.03114	1.97859	NA	NA	NA	NA	NA	NA	NA
chr1_113759400_113760000	0.77115	0.451475	0.000583561	0.0371071	-1.32557	-6.28463	0.126822	1.74551	1.70101	NA	NA	NA	NA	NA	NA	NA
chr1_1137600_1138200	0.815463	0.241363	0.000103356	0.02783	-2.15623	-7.5145	0.118564	1.81671	1.76827	NA	NA	NA	NA	NA	NA	NA
chr1_113760000_113760600	0.736898	0.0247478	0.000354736	-0.0406468	-4.61731	-7.34667	0.120256	1.98902	1.90453	NA	NA	NA	NA	NA	NA	NA
chr1_113788800_113789400	0.0291745	0.00060157	0.0388015	0.335785	-5.22885	2.90738	0.149141	1.4191	1.36681	0.00383008	0.0147376	-8.13623	1.97028	-4.12947	0.000519738	0.00100052
chr1_113789400_113790000	0.0022626	0.000301803	0.091841	0.455509	-5.50913	2.34019	0.140857	1.40908	1.35923	0.00317781	0.024469	-7.84932	1.95781	-4.00923	0.0006885	0.0012013
chr1_113811000_113811600	0.112714	0.0152603	0.494234	0.210867	-3.49539	-0.92266	0.130406	1.38693	1.33898	NA	NA	NA	NA	NA	NA	NA
chr1_113811600_113812200	0.125008	0.00417926	0.230292	0.213143	-4.7581	-1.84282	0.136406	1.57845	1.51583	NA	NA	NA	NA	NA	NA	NA
chr1_113812200_113812800	0.0889583	0.0217661	0.244421	0.236082	-2.99099	1.45019	0.135861	1.2593	1.22992	0.0222053	0.0599059	-4.44118	1.76026	-2.52302	0.0202134	0.00833608
chr1_113812800_113813400	0.0639341	0.00543488	0.85556	0.250566	-4.19773	-0.254527	0.131992	1.4386	1.39045	NA	NA	NA	NA	NA	NA	NA
chr1_1138200_1138800	0.112808	0.405604	6.91616e-05	-0.187719	-1.43905	-7.30347	0.116122	1.71444	1.66955	NA	NA	NA	NA	NA	NA	NA
chr1_113821200_113821800	0.774367	0.00308376	1.25958e-05	0.0286988	-5.4899	-8.23185	0.0995248	1.75728	1.6826	NA	NA	NA	NA	NA	NA	NA
chr1_113821800_113822400	0.562834	0.0704695	3.25223e-07	0.0508649	-2.60861	-8.16936	0.087268	1.40865	1.36931	NA	NA	NA	NA	NA	NA	NA
chr1_113822400_113823000	0.596517	0.0118475	4.97842e-06	0.0488712	-4.04299	-7.77839	0.0916704	1.54265	1.50494	NA	NA	NA	NA	NA	NA	NA
chr1_113871600_113872200	0.213387	0.00696511	0.011623	0.163559	-5.41875	-4.91361	0.129626	1.918	1.86948	NA	NA	NA	NA	NA	NA	NA
chr1_1138800_1139400	0.0167476	0.015419	0.00270175	-0.31971	-5.11365	-6.17147	0.128775	2.0324	1.9461	NA	NA	NA	NA	NA	NA	NA
chr1_113899200_113899800	0.11957	0.0040881	2.19265e-06	0.138826	-5.81319	-10.0238	0.0875276	1.92334	1.8528	NA	NA	NA	NA	NA	NA	NA
chr1_113899800_113900400	0.0271154	0.182343	1.05316e-05	0.149161	-1.34294	-4.79636	0.0653437	0.991819	0.969766	NA	NA	NA	NA	NA	NA	NA
chr1_113900400_113901000	0.0373991	0.17661	1.57666e-06	0.150226	-1.63579	-6.37567	0.0700874	1.19197	1.15781	NA	NA	NA	NA	NA	NA	NA
chr1_113904600_113905200	0.28178	0.00208461	0.0153965	-0.118558	-4.65937	-3.45981	0.108859	1.42813	1.37476	NA	NA	NA	NA	NA	NA	NA
chr1_113905200_113905800	0.0591716	0.00440225	0.0314032	-0.225017	-4.39727	-3.1373	0.116298	1.46798	1.41336	NA	NA	NA	NA	NA	NA	NA
chr1_113912400_113913000	0.815416	0.22094	0.00300268	-0.0314128	-2.61452	-6.34115	0.133793	2.10699	2.02359	NA	NA	NA	NA	NA	NA	NA
chr1_11395200_11395800	0.542151	0.0197921	0.27891	-0.0933401	-4.73327	-2.0938	0.151986	1.96038	1.91091	NA	NA	NA	NA	NA	NA	NA
chr1_11397000_11397600	0.397012	0.0680647	0.0254064	0.118005	-3.13363	-3.7828	0.138027	1.67707	1.63735	NA	NA	NA	NA	NA	NA	NA
chr1_11397600_11398200	0.996754	0.0305635	0.0119165	-0.000529658	-3.64657	-4.17768	0.129486	1.63417	1.59543	NA	NA	NA	NA	NA	NA	NA
chr1_113979000_113979600	0.805888	0.364924	2.79342e-06	0.0248293	-1.22875	-6.8847	0.10046	1.34279	1.28952	NA	NA	NA	NA	NA	NA	NA
chr1_113979600_113980200	0.859105	0.0712973	6.45946e-05	-0.0195701	-2.74372	-6.36592	0.109629	1.48612	1.44824	NA	NA	NA	NA	NA	NA	NA
chr1_113984400_113985000	0.192387	0.581297	0.00397208	-0.191785	-1.183	-6.29876	0.144967	2.12992	2.07681	NA	NA	NA	NA	NA	NA	NA
chr1_113985000_113985600	0.920784	0.610742	0.000706245	0.0127159	-0.954039	-6.57983	0.127168	1.86148	1.81191	NA	NA	NA	NA	NA	NA	NA
chr1_114075600_114076200	0.0782667	0.0422472	9.86606e-05	0.205614	-3.99353	-7.95749	0.11417	1.91151	1.86614	NA	NA	NA	NA	NA	NA	NA
chr1_114076200_114076800	0.0813697	0.0554112	0.000143681	0.206405	-3.74216	-7.70691	0.115836	1.90394	1.85877	NA	NA	NA	NA	NA	NA	NA
chr1_114077400_114078000	0.867983	0.00128492	0.0720321	-0.0212893	-6.09776	-3.19025	0.127365	1.77789	1.73262	NA	NA	NA	NA	NA	NA	NA
chr1_114081600_114082200	0.0790392	0.227082	0.00158518	-0.219315	-2.31317	-6.18445	0.122103	1.88943	1.84187	NA	NA	NA	NA	NA	NA	NA
chr1_114092400_114093000	0.00638628	1.04938e-06	4.38202e-05	0.354116	4.30915	3.39065	0.123912	0.765993	0.750978	0.00245825	0.00198468	0.918505	1.07271	0.856245	0.402005	0.0757936
chr1_114093000_114093600	0.309209	0.0533326	0.0520177	0.189769	2.74623	2.69332	0.184556	1.38475	1.35023	0.0451955	0.0169991	0.0529156	1.93408	0.0273596	0.978444	0.169704
chr1_114099600_114100200	0.0268161	0.00124522	6.26707e-05	0.223278	-6.33943	-7.90245	0.0976105	1.84261	1.79398	NA	NA	NA	NA	NA	NA	NA
chr1_114100200_114100800	0.022628	0.00751157	0.000434754	0.264059	-5.01265	-6.61645	0.111939	1.79238	1.74516	NA	NA	NA	NA	NA	NA	NA
chr1_114106200_114106800	0.226731	0.107559	3.95451e-05	0.131146	-2.38987	-6.43297	0.10704	1.45611	1.41496	NA	NA	NA	NA	NA	NA	NA
chr1_114106800_114107400	0.306227	0.363885	1.60488e-05	0.110263	-1.27131	-6.43007	0.106568	1.38627	1.33413	NA	NA	NA	NA	NA	NA	NA
chr1_114111600_114112200	0.121454	0.0513788	0.0135731	0.211775	-3.38773	-4.24599	0.134219	1.69353	1.65403	NA	NA	NA	NA	NA	NA	NA
chr1_114112200_114112800	0.0910557	0.113459	0.0019593	0.218452	-2.76716	-5.49118	0.126565	1.71493	1.672	NA	NA	NA	NA	NA	NA	NA
chr1_114112800_114113400	0.119645	0.159449	0.00407021	0.216542	-3.02421	-6.13693	0.136555	2.11471	2.02938	NA	NA	NA	NA	NA	NA	NA
chr1_114115800_114116400	0.205737	0.849856	3.58655e-06	0.139253	-0.283818	-7.65346	0.108493	1.49087	1.45354	NA	NA	NA	NA	NA	NA	NA
chr1_114116400_114117000	0.162475	0.763207	1.8283e-06	0.151542	-0.453356	-7.96866	0.106753	1.49591	1.45857	NA	NA	NA	NA	NA	NA	NA
chr1_114123600_114124200	0.0266699	0.00808107	0.000274008	0.25049	-5.16883	-7.16113	0.109396	1.86677	1.81716	NA	NA	NA	NA	NA	NA	NA
chr1_114124200_114124800	0.201227	0.0134893	0.00116516	0.148447	-4.05287	-5.33407	0.114488	1.57729	1.54026	NA	NA	NA	NA	NA	NA	NA
chr1_11412600_11413200	0.0802033	0.0370277	3.24442e-05	0.191083	-3.99998	-8.31681	0.106812	1.86234	1.80535	NA	NA	NA	NA	NA	NA	NA
chr1_11413200_11413800	0.160494	0.0316457	2.99934e-05	0.151653	-4.17187	-8.44927	0.106316	1.88225	1.82464	NA	NA	NA	NA	NA	NA	NA
chr1_114133800_114134400	0.887347	0.026532	0.000208889	-0.0165372	-4.39986	-7.43864	0.116091	1.91969	1.84689	NA	NA	NA	NA	NA	NA	NA
chr1_114150600_114151200	0.162832	0.679266	0.000305052	0.174908	-0.747248	-6.8294	0.12332	1.79581	1.74832	NA	NA	NA	NA	NA	NA	NA
chr1_114151200_114151800	0.193922	0.712698	0.000638599	0.151317	0.476309	-4.54342	0.11478	1.28553	1.23973	0.526506	0.00510128	5.01973	1.78592	2.81072	0.0107978	0.00568751
chr1_114151800_114152400	0.550818	0.143704	0.0284729	0.0703424	-1.97351	-2.89473	0.117051	1.32673	1.27979	NA	NA	NA	NA	NA	NA	NA
chr1_114152400_114153000	0.372857	0.181015	0.00243131	-0.117556	-2.36189	-5.44	0.130632	1.73895	1.69549	NA	NA	NA	NA	NA	NA	NA
chr1_114153000_114153600	0.146542	0.136801	0.80163	-0.228136	-2.33001	0.376734	0.154481	1.53872	1.49087	0.106884	0.231582	-2.70674	2.14251	-1.26335	0.220992	0.0460946
chr1_114153600_114154200	0.284331	0.00922429	0.110512	0.151467	-4.52155	-2.59962	0.139824	1.66345	1.59755	NA	NA	NA	NA	NA	NA	NA
chr1_114154200_114154800	0.5222	0.0294426	4.73928e-05	0.0694201	-4.25935	-8.28429	0.107646	1.89513	1.84466	NA	NA	NA	NA	NA	NA	NA
chr1_114154800_114155400	0.351722	0.0109165	2.44857e-05	-0.0940206	-4.72444	-8.15272	0.0999373	1.78088	1.7375	NA	NA	NA	NA	NA	NA	NA
chr1_114155400_114156000	0.853518	0.0611831	5.6384e-05	0.0204907	-3.1254	-7.047	0.11036	1.62856	1.58803	NA	NA	NA	NA	NA	NA	NA
chr1_114156000_114156600	0.573578	0.0820054	0.00186277	0.0730968	-3.27315	-5.92297	0.128955	1.84088	1.79386	NA	NA	NA	NA	NA	NA	NA
chr1_114191400_114192000	0.0796839	0.197035	0.00209179	0.240657	-2.79608	-6.67943	0.134283	2.13605	2.04806	NA	NA	NA	NA	NA	NA	NA
chr1_114192000_114192600	0.569969	0.0489209	0.00103946	-0.0733285	-4.32124	-7.19083	0.128151	2.1362	2.05346	NA	NA	NA	NA	NA	NA	NA
chr1_114214800_114215400	0.0313407	0.0699185	0.112094	0.321325	-3.31266	-2.82033	0.144701	1.7852	1.74109	NA	NA	NA	NA	NA	NA	NA
chr1_1142400_1143000	0.514999	0.123145	0.000809565	0.081872	-3.16087	-6.91642	0.124777	2.01262	1.92879	NA	NA	NA	NA	NA	NA	NA
chr1_1143000_1143600	0.339442	0.114465	0.00174723	-0.122184	-2.91018	-5.85826	0.126576	1.80873	1.7624	NA	NA	NA	NA	NA	NA	NA
chr1_11433600_11434200	0.29606	0.0703288	0.000266488	0.123712	-3.37024	-6.99554	0.117048	1.81899	1.77113	NA	NA	NA	NA	NA	NA	NA
chr1_11434200_11434800	0.502726	0.184636	0.000119823	0.0797819	-2.1007	-6.39399	0.118104	1.55976	1.52117	NA	NA	NA	NA	NA	NA	NA
chr1_114346200_114346800	0.0312282	0.0346288	0.000431417	0.290913	-5.11448	-8.57138	0.130914	2.34907	2.2593	NA	NA	NA	NA	NA	NA	NA
chr1_114346800_114347400	0.34954	0.0259971	0.000942678	0.114034	-4.06809	-6.09331	0.120657	1.76827	1.72381	NA	NA	NA	NA	NA	NA	NA
chr1_114347400_114348000	0.861376	0.0119943	0.00374084	-0.0212648	-4.67276	-5.31546	0.121096	1.78624	1.74013	NA	NA	NA	NA	NA	NA	NA
chr1_11434800_11435400	0.533076	0.202264	0.000182995	0.0758171	-2.08158	-6.39534	0.120718	1.60915	1.57143	NA	NA	NA	NA	NA	NA	NA
chr1_114350400_114351000	0.628014	0.0828828	0.00405155	0.0633594	-3.30039	-5.48731	0.12989	1.86169	1.81356	NA	NA	NA	NA	NA	NA	NA
chr1_114351000_114351600	0.699829	0.110923	0.00208807	-0.0487836	-2.80723	-5.49117	0.125741	1.72718	1.68339	NA	NA	NA	NA	NA	NA	NA
chr1_114351600_114352200	0.333236	0.0345747	0.00541878	-0.125793	-4.14087	-5.40381	0.128635	1.9013	1.85124	NA	NA	NA	NA	NA	NA	NA
chr1_114354000_114354600	0.434464	0.0840952	0.00189891	0.106362	-3.81965	-6.84842	0.134896	2.16335	2.07836	NA	NA	NA	NA	NA	NA	NA
chr1_1143600_1144200	0.353005	0.206456	0.466792	-0.13966	-1.80206	1.00344	0.148849	1.40627	1.36745	0.160478	0.123559	-2.80549	1.9615	-1.43028	0.168076	0.0367348
chr1_11438400_11439000	0.302868	0.273159	0.000737325	0.135543	-1.94024	-6.17012	0.130083	1.74942	1.70583	NA	NA	NA	NA	NA	NA	NA
chr1_1144200_1144800	0.437023	0.072433	0.183766	-0.113982	-2.54536	1.81156	0.145375	1.3844	1.34235	0.0592987	0.0447545	-4.35692	1.92834	-2.25942	0.0351759	0.0119506
chr1_11442000_11442600	0.0890063	0.233937	0.00362489	0.244195	-2.63454	-6.52893	0.140552	2.18432	2.12945	NA	NA	NA	NA	NA	NA	NA
chr1_11442600_11443200	0.321734	0.21841	0.00379294	0.141275	-2.74231	-6.53378	0.141037	2.19768	2.14248	NA	NA	NA	NA	NA	NA	NA
chr1_1144800_1145400	0.0104312	0.0666905	0.0383701	0.378797	-3.88343	-4.23424	0.14184	2.06757	1.98596	NA	NA	NA	NA	NA	NA	NA
chr1_11449800_11450400	0.283974	0.165634	0.000937069	0.140336	-2.92097	-7.13883	0.129451	2.07346	2.01845	NA	NA	NA	NA	NA	NA	NA
chr1_11450400_11451000	0.632674	0.157908	4.02838e-05	0.0538695	-2.55865	-7.8944	0.111955	1.78241	1.73858	NA	NA	NA	NA	NA	NA	NA
chr1_114509400_114510000	0.891146	0.00549014	0.0273944	-0.0184481	-5.90317	-4.4925	0.134057	2.02568	1.97181	NA	NA	NA	NA	NA	NA	NA
chr1_114510000_114510600	0.634866	0.00490099	0.0504879	-0.0616049	-4.527	-2.98332	0.128863	1.53141	1.4854	NA	NA	NA	NA	NA	NA	NA
chr1_114580800_114581400	0.461731	0.00160378	0.000320133	-0.0766669	-5.83102	-6.60083	0.103295	1.7387	1.69657	NA	NA	NA	NA	NA	NA	NA
chr1_114581400_114582000	0.732323	0.0155983	0.00295884	-0.0386808	-3.61556	-4.34026	0.112405	1.43965	1.38275	NA	NA	NA	NA	NA	NA	NA
chr1_114582000_114582600	0.901461	0.00202109	0.0278072	0.0158423	-5.66208	-3.83477	0.127246	1.72974	1.68785	NA	NA	NA	NA	NA	NA	NA
chr1_11458800_11459400	0.512769	0.0734867	4.15902e-05	-0.0723012	-3.21451	-7.77221	0.109606	1.75501	1.71535	NA	NA	NA	NA	NA	NA	NA
chr1_11459400_11460000	0.321367	0.14122	0.000690453	-0.127028	-2.95911	-7.05142	0.126717	1.97668	1.93777	NA	NA	NA	NA	NA	NA	NA
chr1_1146600_1147200	0.244405	0.212589	0.00309378	-0.159218	-2.69131	-6.41956	0.135029	2.12917	2.05562	NA	NA	NA	NA	NA	NA	NA
chr1_114669000_114669600	0.50559	0.0100187	0.00585591	0.0914922	-6.07323	-6.25675	0.136357	2.26086	2.16481	NA	NA	NA	NA	NA	NA	NA
chr1_114669600_114670200	0.314396	0.137199	0.00715674	0.152583	-2.88372	-5.2278	0.150009	1.90636	1.85715	NA	NA	NA	NA	NA	NA	NA
chr1_114670200_114670800	0.216577	0.1348	0.00277961	0.172103	-2.72234	-5.52101	0.137366	1.78842	1.74654	NA	NA	NA	NA	NA	NA	NA
chr1_11468400_11469000	0.482749	0.363564	0.0409585	0.117583	-2.00996	-4.41115	0.166166	2.19023	2.09749	NA	NA	NA	NA	NA	NA	NA
chr1_114688800_114689400	0.615417	0.0302851	0.00818953	-0.0671217	-4.50454	-5.42103	0.132706	2.01509	1.96145	NA	NA	NA	NA	NA	NA	NA
chr1_114715800_114716400	0.0329973	0.000740678	0.00635364	0.270183	-7.3504	-5.56682	0.122907	2.03298	1.94662	NA	NA	NA	NA	NA	NA	NA
chr1_114716400_114717000	0.00328608	0.000438052	0.415192	0.381087	-4.77587	1.00681	0.122878	1.26051	1.22451	0.00343951	0.107783	-5.78269	1.75736	-3.29056	0.00365472	0.00302682
chr1_114717000_114717600	0.0141485	0.00265588	0.675938	0.332614	-4.45933	-0.56879	0.13041	1.40351	1.35203	NA	NA	NA	NA	NA	NA	NA
chr1_1147200_1147800	0.0205026	0.233162	0.000432165	-0.289537	-2.25718	-6.94177	0.120645	1.86829	1.83003	NA	NA	NA	NA	NA	NA	NA
chr1_114757200_114757800	0.0333079	8.85837e-07	9.58579e-11	-0.238658	-3.97685	5.74205	0.108768	0.700772	0.689107	0.00245825	0.000772152	-9.7189	0.982827	-9.88872	3.81757e-09	0.000126891
chr1_114757800_114758400	0.772422	2.1601e-05	2.41053e-11	-0.0321679	-3.12981	5.70079	0.110574	0.661678	0.65188	0.00260336	0.000772152	-8.83061	0.928852	-9.50701	7.35188e-09	0.000126891
chr1_114758400_114759000	0.000785443	1.1997e-06	0.000584029	0.441483	-6.27832	4.04661	0.122771	1.12383	1.09534	0.00245825	0.00493936	-10.3249	1.56932	-6.57923	2.0747e-06	0.000134086
chr1_11476200_11476800	0.0588492	0.363646	0.00417915	0.27389	-2.00973	-6.4198	0.14137	2.19036	2.12969	NA	NA	NA	NA	NA	NA	NA
chr1_11476800_11477400	0.0533393	0.141001	0.000117793	0.236741	-2.92672	-8.05813	0.119377	1.95395	1.91463	NA	NA	NA	NA	NA	NA	NA
chr1_1147800_1148400	0.178949	0.0198855	0.000119318	0.149937	-4.37911	-7.45556	0.109859	1.81515	1.77316	NA	NA	NA	NA	NA	NA	NA
chr1_114780000_114780600	0.00139056	0.000844405	0.00846501	-0.423146	-7.48049	-5.51839	0.124355	2.09434	2.00586	NA	NA	NA	NA	NA	NA	NA
chr1_114780600_114781200	0.00607085	0.000446422	0.00310684	-0.325304	-7.41825	-5.97083	0.11308	1.96113	1.91285	NA	NA	NA	NA	NA	NA	NA
chr1_11478600_11479200	0.388364	0.0318636	0.355911	0.133606	-4.361	-1.79066	0.153423	1.97022	1.92015	NA	NA	NA	NA	NA	NA	NA
chr1_11480400_11481000	0.229835	0.0147486	0.000312829	-0.138308	-4.74854	-7.03458	0.113653	1.874	1.80459	NA	NA	NA	NA	NA	NA	NA
chr1_11481000_11481600	0.15744	0.165434	0.00178719	-0.185163	-2.82381	-6.49831	0.12884	2.00353	1.95957	NA	NA	NA	NA	NA	NA	NA
chr1_114854400_114855000	0.217728	0.000188786	0.0180952	0.144869	-6.91467	-4.06955	0.115923	1.70318	1.66022	NA	NA	NA	NA	NA	NA	NA
chr1_114855000_114855600	0.680161	0.0199404	0.000959784	0.0492498	-4.27816	-6.10335	0.11871	1.77415	1.72962	NA	NA	NA	NA	NA	NA	NA
chr1_11487000_11487600	0.888598	0.393485	0.00412527	0.0179963	-1.4434	-4.93166	0.127763	1.67564	1.63346	NA	NA	NA	NA	NA	NA	NA
chr1_11487600_11488200	0.498027	0.121898	0.024835	0.0949994	-2.57179	-3.69068	0.13909	1.63194	1.59087	NA	NA	NA	NA	NA	NA	NA
chr1_11488200_11488800	0.725341	0.00173741	0.0495089	0.0459936	-6.17681	-3.65035	0.130115	1.85714	1.80944	NA	NA	NA	NA	NA	NA	NA
chr1_1149000_1149600	0.925029	0.000214969	0.0473441	-0.0111228	-6.76173	-3.34124	0.117555	1.68264	1.63964	NA	NA	NA	NA	NA	NA	NA
chr1_11492400_11493000	0.0476613	0.0368843	0.00320141	-0.266463	-4.42996	-6.13862	0.130956	2.0609	1.97339	NA	NA	NA	NA	NA	NA	NA
chr1_1149600_1150200	0.700877	0.271395	0.0140456	-0.0617685	-2.62336	-5.85946	0.159798	2.35655	2.29474	NA	NA	NA	NA	NA	NA	NA
chr1_114976200_114976800	0.166811	0.169314	0.00724713	0.187988	-2.58233	-5.06369	0.133823	1.84936	1.80189	NA	NA	NA	NA	NA	NA	NA
chr1_114976800_114977400	0.388393	0.350011	0.0325691	0.131186	-1.90253	-4.32709	0.150653	2.01501	1.96333	NA	NA	NA	NA	NA	NA	NA
chr1_11498400_11499000	0.738585	0.00146975	0.442168	0.0476836	-4.9218	1.08304	0.142021	1.45455	1.39705	0.00513173	0.11593	-6.00484	2.0168	-2.97741	0.00744459	0.00456623
chr1_11499000_11499600	0.836516	0.000787984	0.326312	0.0282094	-5.69364	-1.52678	0.135933	1.58381	1.53886	NA	NA	NA	NA	NA	NA	NA
chr1_1150200_1150800	0.172861	0.589438	0.00102678	0.200485	0.8639	-5.36372	0.144799	1.58963	1.52989	0.452287	0.0058426	6.22762	2.20624	2.82273	0.0105144	0.00558529
chr1_11502000_11502600	0.13374	0.0548563	0.000166055	0.172687	-3.58129	-7.28856	0.113129	1.81778	1.77746	NA	NA	NA	NA	NA	NA	NA
chr1_115062000_115062600	0.273059	0.432722	0.00428315	0.148721	-1.60208	-5.90172	0.134066	2.02415	1.96366	NA	NA	NA	NA	NA	NA	NA
chr1_115074600_115075200	0.720537	0.0490406	0.00212422	0.0432411	-3.81868	-5.89207	0.120133	1.8888	1.80962	NA	NA	NA	NA	NA	NA	NA
chr1_1150800_1151400	0.38358	0.421924	0.000616096	0.110781	1.13553	-4.9685	0.125927	1.40133	1.35134	0.331461	0.00503718	6.10403	1.94675	3.1355	0.00520779	0.00370231
chr1_115132800_115133400	0.00618804	0.623725	0.0177015	0.4578	-1.0425	-5.04387	0.159534	2.11074	2.05019	NA	NA	NA	NA	NA	NA	NA
chr1_1151400_1152000	0.472562	0.588636	1.33036e-05	0.0846204	0.742526	-6.39859	0.116834	1.36335	1.31227	0.451787	0.00147883	7.14112	1.89229	3.77379	0.0011933	0.00164761
chr1_115179000_115179600	0.946897	0.217258	0.228012	-0.0101981	-1.78589	1.68643	0.152281	1.42757	1.3803	0.169208	0.0557675	-3.47232	1.98575	-1.74862	0.0956899	0.0237906
chr1_115179600_115180200	0.943746	0.222796	0.258505	0.0106737	-1.74561	1.56338	0.150442	1.41251	1.36649	0.173499	0.0635944	-3.309	1.96532	-1.68369	0.107786	0.0259801
chr1_11518800_11519400	0.850605	0.0333465	0.00219723	-0.0228249	-3.46092	-4.92926	0.120506	1.57766	1.51944	NA	NA	NA	NA	NA	NA	NA
chr1_11519400_11520000	0.85883	0.0636613	0.00027167	-0.0202146	-2.94719	-5.97298	0.113017	1.55086	1.51461	NA	NA	NA	NA	NA	NA	NA
chr1_115227600_115228200	0.209512	0.226619	0.00335002	-0.174233	-2.62554	-6.46195	0.136898	2.14241	2.08826	NA	NA	NA	NA	NA	NA	NA
chr1_115258200_115258800	0.299855	0.00206206	0.243161	0.17098	4.07612	1.43908	0.163061	1.24791	1.21719	0.00580435	0.05959	2.63704	1.74322	1.51274	0.145989	0.0328006
chr1_115281000_115281600	0.850793	0.0597613	3.49024e-05	-0.0204155	-3.50605	-8.16258	0.107922	1.81644	1.78047	NA	NA	NA	NA	NA	NA	NA
chr1_115281600_115282200	0.790947	0.0795405	0.000183201	-0.0305739	-2.96451	-6.561	0.114669	1.65334	1.61228	NA	NA	NA	NA	NA	NA	NA
chr1_115282800_115283400	0.720462	0.17511	0.000798312	0.0454869	-2.32672	-5.92064	0.126337	1.68944	1.64895	NA	NA	NA	NA	NA	NA	NA
chr1_115283400_115284000	0.459069	0.180514	5.69319e-05	0.0832076	-2.05002	-6.52646	0.11144	1.50757	1.47172	NA	NA	NA	NA	NA	NA	NA
chr1_11528400_11529000	0.0730658	0.158063	0.00043121	0.232568	-2.86628	-7.429	0.126782	1.99748	1.9581	NA	NA	NA	NA	NA	NA	NA
chr1_115284000_115284600	0.708414	0.00532561	0.00717992	-0.0471402	-5.86255	-5.52583	0.125269	2.00399	1.96387	NA	NA	NA	NA	NA	NA	NA
chr1_115285800_115286400	0.832257	0.00215862	0.000120924	-0.0212665	-5.43102	-6.84048	0.0998359	1.67091	1.6285	NA	NA	NA	NA	NA	NA	NA
chr1_115286400_115287000	0.641222	0.0024452	2.95569e-05	-0.0440141	-5.06273	-7.14447	0.0938292	1.57889	1.54138	NA	NA	NA	NA	NA	NA	NA
chr1_115287000_115287600	0.496265	0.000187443	0.000613009	-0.0694133	-7.44036	-6.58851	0.101211	1.83164	1.79114	NA	NA	NA	NA	NA	NA	NA
chr1_11529000_11529600	0.402312	0.0852293	8.27604e-05	0.0935913	-2.62494	-6.28183	0.110718	1.49231	1.45451	NA	NA	NA	NA	NA	NA	NA
chr1_11529600_11530200	0.898437	0.200891	1.98318e-05	0.0131341	-1.77241	-6.24199	0.102335	1.36591	1.31247	NA	NA	NA	NA	NA	NA	NA
chr1_115299000_115299600	0.160623	0.00293307	0.000996588	0.157512	-5.73222	-6.24644	0.110459	1.8244	1.77656	NA	NA	NA	NA	NA	NA	NA
chr1_115299600_115300200	0.174639	0.123297	7.15013e-05	0.121513	-2.03832	-5.47229	0.0881331	1.2984	1.2539	NA	NA	NA	NA	NA	NA	NA
chr1_115300200_115300800	0.257411	0.0483927	9.85312e-07	0.104858	-2.84703	-7.68683	0.0914391	1.40399	1.36196	NA	NA	NA	NA	NA	NA	NA
chr1_11530200_11530800	0.945713	0.108158	5.26392e-05	-0.00746627	-2.66811	-7.07662	0.109055	1.62848	1.58715	NA	NA	NA	NA	NA	NA	NA
chr1_11531400_11532000	0.952182	0.434215	2.80885e-07	0.00568304	-1.04515	-7.7008	0.0942538	1.32481	1.28165	NA	NA	NA	NA	NA	NA	NA
chr1_115317600_115318200	0.276599	0.583278	0.00336608	-0.159019	-1.16633	-6.35715	0.144424	2.11099	2.05554	NA	NA	NA	NA	NA	NA	NA
chr1_11532000_11532600	0.822819	0.180434	1.82734e-07	0.0209376	-2.11262	-9.2841	0.0929726	1.55331	1.5138	NA	NA	NA	NA	NA	NA	NA
chr1_115333200_115333800	0.549535	0.337794	0.116133	0.0926494	-1.71284	-2.76579	0.153673	1.76832	1.72711	NA	NA	NA	NA	NA	NA	NA
chr1_11533800_11534400	0.219646	0.076402	9.17412e-05	0.140133	-3.38546	-7.822	0.112609	1.86761	1.82467	NA	NA	NA	NA	NA	NA	NA
chr1_115338600_115339200	0.674018	0.0814954	0.00114982	0.0561011	-3.83149	-7.20285	0.13252	2.15118	2.07718	NA	NA	NA	NA	NA	NA	NA
chr1_11534400_11535000	0.0108276	0.118627	4.84653e-05	0.295226	-2.87711	-7.9526	0.111152	1.80923	1.77352	NA	NA	NA	NA	NA	NA	NA
chr1_11535000_11535600	0.512283	0.142763	0.00175209	0.088738	-3.2315	-6.89593	0.134368	2.16721	2.07517	NA	NA	NA	NA	NA	NA	NA
chr1_11536200_11536800	0.270477	0.166126	2.67982e-05	-0.124589	-2.49493	-8.05244	0.1117	1.77314	1.7262	NA	NA	NA	NA	NA	NA	NA
chr1_11536800_11537400	0.234086	0.037041	9.39397e-05	-0.13131	-3.61115	-7.01043	0.108905	1.68144	1.63817	NA	NA	NA	NA	NA	NA	NA
chr1_11537400_11538000	0.837454	0.0125766	0.00198944	0.0250916	-5.13445	-6.35068	0.121618	1.97685	1.93684	NA	NA	NA	NA	NA	NA	NA
chr1_115431600_115432200	0.113492	0.00623058	0.153487	0.232725	-5.53901	-2.7329	0.144243	1.93195	1.8831	NA	NA	NA	NA	NA	NA	NA
chr1_115432200_115432800	0.250852	0.0151869	0.692855	0.18715	-5.05807	-0.776202	0.16093	2.00545	1.95283	NA	NA	NA	NA	NA	NA	NA
chr1_115479000_115479600	0.675847	0.067516	0.000150063	0.0491453	-3.65082	-7.87497	0.116785	1.94983	1.9056	NA	NA	NA	NA	NA	NA	NA
chr1_115496400_115497000	0.441898	0.184332	0.00492733	0.100032	-2.46523	-5.26305	0.128958	1.82912	1.78159	NA	NA	NA	NA	NA	NA	NA
chr1_115540800_115541400	0.304816	0.206776	1.58005e-08	0.0849562	-1.63995	-8.43859	0.081867	1.28068	1.23366	NA	NA	NA	NA	NA	NA	NA
chr1_115541400_115542000	0.174121	0.332797	4.47385e-08	0.120094	-1.24292	-8.00443	0.086997	1.26984	1.224	NA	NA	NA	NA	NA	NA	NA
chr1_115545000_115545600	0.083732	0.0497653	9.59487e-05	-0.201003	-3.79709	-7.89216	0.113705	1.88438	1.84705	NA	NA	NA	NA	NA	NA	NA
chr1_1155600_1156200	0.202204	0.735754	7.53158e-07	-0.128833	0.421743	-6.8257	0.0995802	1.24213	1.19285	0.538675	0.00101161	7.24745	1.72214	4.20839	0.000432156	0.000895348
chr1_11557800_11558400	0.452255	0.00529267	0.000226573	0.081171	-5.42151	-7.24218	0.107071	1.85178	1.80976	NA	NA	NA	NA	NA	NA	NA
chr1_11558400_11559000	0.882233	0.00739055	0.000226266	0.016063	-5.12058	-7.12926	0.107831	1.82695	1.78135	NA	NA	NA	NA	NA	NA	NA
chr1_1156200_1156800	0.373897	0.593862	0.00995324	-0.101759	0.661856	-3.22561	0.113326	1.23253	1.19965	0.455183	0.0098511	3.88747	1.71997	2.2602	0.0351197	0.0119406
chr1_11562600_11563200	0.97694	0.0673016	0.00103991	0.00354741	-2.86936	-5.2156	0.122058	1.53122	1.48947	NA	NA	NA	NA	NA	NA	NA
chr1_11563200_11563800	0.829425	0.0590223	0.444258	0.0264327	-2.50683	-0.969576	0.121996	1.29484	1.25647	NA	NA	NA	NA	NA	NA	NA
chr1_11563800_11564400	0.0290576	0.0455487	0.876561	0.335317	-3.15214	-0.230131	0.148819	1.53364	1.47334	NA	NA	NA	NA	NA	NA	NA
chr1_115640400_115641000	0.307351	0.0916083	0.000271538	0.129036	-3.59255	-8.05733	0.125004	2.08509	2.04307	NA	NA	NA	NA	NA	NA	NA
chr1_11564400_11565000	0.3601	0.968973	1.7296e-05	-0.0988865	-0.0527401	-6.21859	0.106974	1.34854	1.29631	NA	NA	NA	NA	NA	NA	NA
chr1_115648800_115649400	0.0346408	0.15266	0.000591663	0.26891	-2.81972	-7.00104	0.123519	1.93893	1.89725	NA	NA	NA	NA	NA	NA	NA
chr1_11565000_11565600	0.570746	0.804938	5.49013e-06	-0.0439328	-0.281997	-5.6882	0.0769336	1.1353	1.10674	NA	NA	NA	NA	NA	NA	NA
chr1_115650600_115651200	0.415913	0.103633	0.000262008	0.0999446	-3.24285	-7.57045	0.121744	1.95304	1.91405	NA	NA	NA	NA	NA	NA	NA
chr1_115651200_115651800	0.244617	0.0688533	0.000100147	0.135904	-3.5183	-7.88347	0.11531	1.88852	1.85081	NA	NA	NA	NA	NA	NA	NA
chr1_115654200_115654800	0.991982	0.0594332	0.000112254	0.00115217	-3.7008	-7.89989	0.114031	1.91477	1.87033	NA	NA	NA	NA	NA	NA	NA
chr1_115654800_115655400	0.650108	0.062002	0.0292851	-0.0521791	-2.76621	-3.14158	0.114278	1.44611	1.39636	NA	NA	NA	NA	NA	NA	NA
chr1_115655400_115656000	0.585938	0.0937618	0.0745893	-0.068185	-2.51343	-2.58518	0.124291	1.46874	1.41701	NA	NA	NA	NA	NA	NA	NA
chr1_11565600_11566200	0.958593	0.487767	1.04781e-05	0.00414376	-0.819232	-5.63505	0.0793778	1.17119	1.13899	NA	NA	NA	NA	NA	NA	NA
chr1_11566200_11566800	0.368428	0.0324372	5.216e-06	0.0893695	-3.86908	-8.85168	0.0983869	1.75411	1.71718	NA	NA	NA	NA	NA	NA	NA
chr1_11566800_11567400	0.219627	0.114215	8.4263e-06	0.130326	-2.80622	-8.50614	0.104724	1.74289	1.69702	NA	NA	NA	NA	NA	NA	NA
chr1_115671000_115671600	0.429606	0.532864	0.00195998	-0.1049	-0.950031	-4.76725	0.131636	1.51188	1.45162	NA	NA	NA	NA	NA	NA	NA
chr1_115671600_115672200	0.958493	0.13756	0.00504578	0.00725155	-2.86343	-5.43975	0.138576	1.89473	1.84688	NA	NA	NA	NA	NA	NA	NA
chr1_115678800_115679400	0.408146	0.480693	0.0121195	-0.121855	-1.51814	-5.46781	0.14597	2.13532	2.09344	NA	NA	NA	NA	NA	NA	NA
chr1_1156800_1157400	0.990611	0.17878	0.339657	-0.0017356	-2.08412	-1.4186	0.146692	1.52643	1.47026	NA	NA	NA	NA	NA	NA	NA
chr1_115684200_115684800	0.0113423	0.729744	0.893688	-0.409114	0.489705	0.182185	0.15509	1.40892	1.35574	0.535479	0.259592	0.30752	1.95527	0.157278	0.876603	0.154319
chr1_115684800_115685400	0.116675	0.457173	0.0846174	-0.278228	1.04463	2.37884	0.174006	1.39316	1.34966	0.359052	0.0230327	-1.33421	1.93971	-0.68784	0.499454	0.091529
chr1_115710600_115711200	0.660479	0.0341474	0.00621949	0.0554199	-4.06062	-5.19169	0.125352	1.85981	1.81039	NA	NA	NA	NA	NA	NA	NA
chr1_115711200_115711800	0.628342	0.118823	0.0121238	0.0656968	-2.92439	-4.68254	0.134811	1.83996	1.79288	NA	NA	NA	NA	NA	NA	NA
chr1_115711800_115712400	0.158326	0.0797009	0.0114885	0.207034	-3.92253	-5.51844	0.144373	2.18884	2.09596	NA	NA	NA	NA	NA	NA	NA
chr1_115728600_115729200	0.0043661	0.0198313	0.00149927	0.351276	-4.18494	-5.70234	0.117152	1.73386	1.68864	NA	NA	NA	NA	NA	NA	NA
chr1_115768200_115768800	0.1375	0.100253	0.116697	0.161106	-2.02307	-1.87677	0.106587	1.2061	1.17382	NA	NA	NA	NA	NA	NA	NA
chr1_115768800_115769400	0.142945	0.0117843	0.0108912	0.155098	-3.60141	-3.51076	0.104065	1.37306	1.32293	NA	NA	NA	NA	NA	NA	NA
chr1_115770000_115770600	0.0145967	0.243033	0.00129073	0.326952	-2.40905	-6.74086	0.12882	2.03704	1.96628	NA	NA	NA	NA	NA	NA	NA
chr1_115837200_115837800	0.131631	0.183505	0.0269793	-0.225864	-2.66714	-4.39799	0.147142	1.97513	1.92484	NA	NA	NA	NA	NA	NA	NA
chr1_115837800_115838400	0.507392	0.481009	0.667233	-0.105335	-1.12771	-0.660788	0.157658	1.58732	1.52702	NA	NA	NA	NA	NA	NA	NA
chr1_115946400_115947000	0.0260303	0.0186917	0.0550094	-0.333049	-5.08395	-3.93165	0.1448	2.08533	1.99692	NA	NA	NA	NA	NA	NA	NA
chr1_115947000_115947600	0.200918	0.0159312	0.0400995	-0.18298	-5.22602	-4.22379	0.141023	2.08798	1.99942	NA	NA	NA	NA	NA	NA	NA
chr1_115977000_115977600	0.364933	0.088548	0.000543253	-0.131837	-1.89253	3.95724	0.144075	1.08767	1.06427	0.071255	0.0048044	-5.84977	1.52175	-3.84412	0.00101269	0.00150803
chr1_115977600_115978200	0.865554	0.987372	8.01753e-06	-0.0267051	0.0167403	5.18018	0.156851	1.05197	1.03043	0.634508	0.001373	-5.16344	1.47256	-3.50644	0.00222172	0.0022714
chr1_115978200_115978800	0.00654389	0.18686	0.00455494	-0.522504	-2.05266	4.44333	0.18342	1.53196	1.48956	0.145356	0.00843817	-6.49599	2.13675	-3.04013	0.00646385	0.00421492
chr1_1159800_1160400	0.678694	0.114707	0.0221535	-0.0545647	-2.47863	-3.51374	0.130884	1.54157	1.48397	NA	NA	NA	NA	NA	NA	NA
chr1_1160400_1161000	0.902175	0.248896	0.217433	0.00711638	0.544575	-0.579063	0.0575785	0.466319	0.463059	0.194155	0.0529944	1.12364	0.657173	1.70981	0.102773	0.0250692
chr1_11607600_11608200	0.0630076	0.0413356	8.37497e-05	-0.209285	-3.73952	-7.53348	0.109847	1.7816	1.74581	NA	NA	NA	NA	NA	NA	NA
chr1_11608200_11608800	0.37904	0.046279	0.0246913	-0.118025	-3.35106	-3.7107	0.132877	1.63616	1.59781	NA	NA	NA	NA	NA	NA	NA
chr1_1161000_1161600	0.841563	0.251933	0.286372	0.0111769	0.513687	-0.474762	0.0555988	0.44274	0.440151	0.196593	0.070961	0.988449	0.6243	1.58329	0.129041	0.0297964
chr1_11610000_11610600	0.44568	0.370619	0.11252	-0.120906	-1.55373	-2.68877	0.157175	1.71842	1.66189	NA	NA	NA	NA	NA	NA	NA
chr1_11610600_11611200	0.539673	0.0929675	0.0106292	-0.0851403	-3.37893	-5.10997	0.137785	1.96956	1.91868	NA	NA	NA	NA	NA	NA	NA
chr1_116110200_116110800	0.189537	0.107257	3.46304e-06	0.137623	-2.84639	-8.90202	0.103349	1.73273	1.68736	NA	NA	NA	NA	NA	NA	NA
chr1_116110800_116111400	0.0972388	0.113237	4.46074e-06	0.177849	-2.85263	-8.94849	0.105057	1.76678	1.72052	NA	NA	NA	NA	NA	NA	NA
chr1_11611200_11611800	0.928095	0.185508	0.0132349	-0.0128095	-2.63923	-4.92979	0.14117	1.96358	1.91293	NA	NA	NA	NA	NA	NA	NA
chr1_116122200_116122800	0.265212	0.315167	0.00227034	0.147408	-2.05691	-6.37036	0.130693	2.02547	1.97064	NA	NA	NA	NA	NA	NA	NA
chr1_116122800_116123400	0.0862336	0.788828	9.87978e-06	0.200682	-0.436656	-7.84325	0.114468	1.62086	1.57972	NA	NA	NA	NA	NA	NA	NA
chr1_116123400_116124000	0.370092	0.110557	7.10043e-06	0.0934426	-2.76351	-8.37412	0.103232	1.69848	1.65388	NA	NA	NA	NA	NA	NA	NA
chr1_11614800_11615400	0.144064	0.0135116	0.133191	-0.205573	-3.99461	-2.28938	0.138328	1.55501	1.49762	NA	NA	NA	NA	NA	NA	NA
chr1_116151600_116152200	0.337794	0.223579	0.00248545	-0.131527	-2.58375	-6.56839	0.135787	2.09431	2.05215	NA	NA	NA	NA	NA	NA	NA
chr1_1161600_1162200	0.803476	0.911539	0.000585679	-0.0239245	-0.13527	-4.35535	0.0955865	1.2109	1.1792	NA	NA	NA	NA	NA	NA	NA
chr1_116166600_116167200	0.0557342	0.0869474	0.00895341	0.273255	-3.60884	-5.48329	0.139219	2.06329	2.0088	NA	NA	NA	NA	NA	NA	NA
chr1_116167200_116167800	0.466472	0.0781482	0.0383935	-0.0882289	-2.61349	-2.98045	0.120149	1.45058	1.39808	NA	NA	NA	NA	NA	NA	NA
chr1_116167800_116168400	0.103745	0.01107	0.569965	-0.210873	-3.81562	-0.798327	0.127043	1.44126	1.39517	NA	NA	NA	NA	NA	NA	NA
chr1_116266800_116267400	0.00165238	0.0801057	0.000140643	0.383664	-3.37438	-7.53012	0.114754	1.88558	1.81318	NA	NA	NA	NA	NA	NA	NA
chr1_116277600_116278200	0.0515276	0.119877	0.995064	0.266955	-2.10733	-0.00802505	0.13354	1.32977	1.29007	NA	NA	NA	NA	NA	NA	NA
chr1_116278200_116278800	0.356448	0.0967069	0.876694	0.129004	-2.39187	-0.213547	0.138488	1.41058	1.36864	NA	NA	NA	NA	NA	NA	NA
chr1_116286000_116286600	0.804443	0.266956	0.0284917	0.0392666	-2.44958	-4.8025	0.157676	2.17986	2.1235	NA	NA	NA	NA	NA	NA	NA
chr1_116293200_116293800	0.570849	0.209358	0.226755	0.0933818	-2.46752	-2.31582	0.163571	1.93811	1.89024	NA	NA	NA	NA	NA	NA	NA
chr1_116313000_116313600	0.726145	0.287757	0.00168527	0.0444804	-2.10656	-6.3637	0.12622	1.95868	1.90728	NA	NA	NA	NA	NA	NA	NA
chr1_116335800_116336400	0.341221	0.22603	0.0483934	-0.148974	-2.65099	-4.26661	0.154905	2.16039	2.10405	NA	NA	NA	NA	NA	NA	NA
chr1_116336400_116337000	0.309063	0.149705	0.0248822	-0.148054	-2.9844	-4.60094	0.143943	2.03705	1.98392	NA	NA	NA	NA	NA	NA	NA
chr1_1163400_1164000	0.618293	0.11219	0.000157326	-0.0561505	-2.29953	-5.65389	0.111927	1.41997	1.3731	NA	NA	NA	NA	NA	NA	NA
chr1_116371800_116372400	0.213318	0.038717	0.000154347	-0.146324	-4.09165	-7.74568	0.115949	1.92268	1.87835	NA	NA	NA	NA	NA	NA	NA
chr1_116372400_116373000	0.338855	0.150994	9.37812e-05	-0.115271	-2.62323	-7.49182	0.119268	1.79632	1.75044	NA	NA	NA	NA	NA	NA	NA
chr1_116376000_116376600	0.0611486	0.0278804	3.05652e-05	0.208311	-4.32147	-8.62441	0.10853	1.90301	1.86477	NA	NA	NA	NA	NA	NA	NA
chr1_116376600_116377200	0.615612	0.234053	0.00331763	0.0727093	-2.69082	-6.77332	0.143833	2.23154	2.18642	NA	NA	NA	NA	NA	NA	NA
chr1_116382600_116383200	0.858251	0.0349667	0.0115756	0.0246139	-3.81449	-4.50784	0.137045	1.75542	1.71405	NA	NA	NA	NA	NA	NA	NA
chr1_116383200_116383800	0.231028	0.0132034	0.0125858	0.158809	-4.47566	-4.39671	0.130839	1.73608	1.693	NA	NA	NA	NA	NA	NA	NA
chr1_1164000_1164600	0.768158	0.0238044	0.00326429	0.0350634	-3.56447	-4.5435	0.118245	1.52475	1.46389	NA	NA	NA	NA	NA	NA	NA
chr1_116400600_116401200	0.0103885	0.127983	0.00048431	0.339562	-3.14544	-7.46503	0.127073	2.02927	1.9875	NA	NA	NA	NA	NA	NA	NA
chr1_116404800_116405400	0.864277	0.0568844	0.00449551	-0.0217544	-3.5737	-5.32399	0.126559	1.8296	1.78192	NA	NA	NA	NA	NA	NA	NA
chr1_116418000_116418600	0.959056	0.176065	0.184093	-0.00822799	-2.5144	-2.40925	0.159398	1.82984	1.78659	NA	NA	NA	NA	NA	NA	NA
chr1_116418600_116419200	0.111075	0.127263	0.100453	0.241169	-2.67762	-2.82186	0.148447	1.7241	1.68334	NA	NA	NA	NA	NA	NA	NA
chr1_116420400_116421000	0.224334	0.0865915	0.000697916	0.157555	-3.67529	-7.30594	0.127921	2.09884	2.00968	NA	NA	NA	NA	NA	NA	NA
chr1_1164600_1165200	0.407665	0.481727	0.851185	0.090424	0.616316	0.160765	0.108207	0.868926	0.852118	0.377545	0.24686	0.45555	1.21702	0.374316	0.712108	0.12719
chr1_11646000_11646600	0.645337	0.0417628	9.80882e-05	0.0508473	-3.84491	-7.66873	0.109752	1.83583	1.79766	NA	NA	NA	NA	NA	NA	NA
chr1_11646600_11647200	0.359117	0.162953	0.000764702	-0.117438	-2.89369	-7.18169	0.12678	2.04081	1.99219	NA	NA	NA	NA	NA	NA	NA
chr1_116466000_116466600	0.764443	0.0452462	0.00162612	0.0377784	-3.8255	-6.06427	0.12533	1.85854	1.81083	NA	NA	NA	NA	NA	NA	NA
chr1_11647200_11647800	0.0240016	0.346927	0.00119952	0.319883	-2.01644	-7.18295	0.137037	2.12191	2.08008	NA	NA	NA	NA	NA	NA	NA
chr1_116474400_116475000	0.0438174	0.180121	0.000811221	0.2656	-2.7259	-7.03489	0.128135	2.00277	1.96221	NA	NA	NA	NA	NA	NA	NA
chr1_116475000_116475600	0.136059	0.0482522	0.00137298	0.18289	-3.11626	-5.05256	0.120545	1.53576	1.48295	NA	NA	NA	NA	NA	NA	NA
chr1_116475600_116476200	0.0894527	0.0072353	0.00280511	0.205175	-4.53484	-4.97424	0.118263	1.61334	1.57519	NA	NA	NA	NA	NA	NA	NA
chr1_11647800_11648400	0.431971	0.0390519	2.17126e-05	0.0833405	-3.86956	-8.44017	0.105124	1.82159	1.78494	NA	NA	NA	NA	NA	NA	NA
chr1_11648400_11649000	0.179625	0.00218301	2.24293e-05	-0.131611	-5.98605	-8.51656	0.0965848	1.8439	1.80484	NA	NA	NA	NA	NA	NA	NA
chr1_11649000_11649600	0.308312	0.0852888	5.79762e-06	-0.105492	-3.14179	-8.91034	0.102402	1.78649	1.73912	NA	NA	NA	NA	NA	NA	NA
chr1_116493000_116493600	0.376349	0.00462431	0.131313	-0.113133	-4.39751	-2.17878	0.126647	1.47694	1.41819	NA	NA	NA	NA	NA	NA	NA
chr1_116493600_116494200	0.698291	0.120242	0.137398	-0.0492568	-2.26977	-2.09474	0.12628	1.43373	1.38551	NA	NA	NA	NA	NA	NA	NA
chr1_116494200_116494800	0.717998	0.195292	0.0221018	0.0494305	-2.02217	-3.52256	0.136036	1.53871	1.48709	NA	NA	NA	NA	NA	NA	NA
chr1_116495400_116496000	0.70473	0.0461591	0.000257986	-0.0432868	-3.81899	-7.22876	0.113522	1.86356	1.82537	NA	NA	NA	NA	NA	NA	NA
chr1_116496000_116496600	0.242797	0.0268515	0.00199025	0.14251	-4.07591	-5.69369	0.120442	1.7823	1.73655	NA	NA	NA	NA	NA	NA	NA
chr1_11650200_11650800	0.399362	0.0564908	5.7251e-05	-0.0922363	-3.47309	-7.68956	0.108429	1.77515	1.73467	NA	NA	NA	NA	NA	NA	NA
chr1_116504400_116505000	0.0123744	0.377436	0.00506475	0.397594	0.991933	3.20667	0.152704	1.11298	1.08923	0.297174	0.00860512	-2.21474	1.55728	-1.42218	0.170383	0.0371406
chr1_116515200_116515800	0.089262	0.343295	0.0020442	0.215741	-1.36691	-4.48311	0.124277	1.42751	1.37123	NA	NA	NA	NA	NA	NA	NA
chr1_116515800_116516400	0.0734128	0.168597	0.00609369	0.238745	-2.1208	-4.20898	0.130312	1.51623	1.46381	NA	NA	NA	NA	NA	NA	NA
chr1_1165200_1165800	0.874027	0.43048	0.403276	0.017426	0.773987	-0.803474	0.109301	0.973112	0.952474	0.338022	0.104152	1.57746	1.36167	1.15847	0.260318	0.0527793
chr1_11652000_11652600	0.824112	0.335089	0.00675407	-0.0318721	-2.12858	-6.01216	0.142585	2.18512	2.11935	NA	NA	NA	NA	NA	NA	NA
chr1_11652600_11653200	0.869501	0.292063	0.00317679	-0.022895	-1.86212	-5.31175	0.13858	1.74712	1.70606	NA	NA	NA	NA	NA	NA	NA
chr1_11653200_11653800	0.593588	0.00524916	0.00223278	0.0623381	-5.32341	-5.7276	0.116002	1.81638	1.7686	NA	NA	NA	NA	NA	NA	NA
chr1_11653800_11654400	0.486162	0.11461	0.0206554	0.0977186	-3.11967	-4.52892	0.139183	1.93973	1.88953	NA	NA	NA	NA	NA	NA	NA
chr1_116569800_116570400	0.493579	0.033772	0.0477298	-0.0956806	-3.57538	-3.24193	0.138642	1.63395	1.59379	NA	NA	NA	NA	NA	NA	NA
chr1_116571000_116571600	0.211314	0.233046	6.113e-05	-0.141239	-1.78638	-6.3651	0.111421	1.47823	1.44247	NA	NA	NA	NA	NA	NA	NA
chr1_116571600_116572200	0.906553	0.124709	3.58921e-06	-0.0119237	-2.54578	-8.34952	0.101018	1.62791	1.5858	NA	NA	NA	NA	NA	NA	NA
chr1_1165800_1166400	0.686288	0.565325	0.0053885	-0.0579958	-0.932414	-4.51712	0.142685	1.61002	1.54638	NA	NA	NA	NA	NA	NA	NA
chr1_116592600_116593200	0.0202464	0.00753395	0.0585204	0.335583	-6.09477	-4.05004	0.139529	2.18019	2.08763	NA	NA	NA	NA	NA	NA	NA
chr1_11661000_11661600	0.100484	0.273507	0.0411357	-0.25408	-2.2921	-4.23365	0.151582	2.06819	2.01494	NA	NA	NA	NA	NA	NA	NA
chr1_11661600_11662200	0.0820452	0.182346	0.00304887	-0.250931	-3.06059	-6.86181	0.141147	2.26038	2.19356	NA	NA	NA	NA	NA	NA	NA
chr1_1166400_1167000	0.527689	0.048013	0.0293562	-0.0915563	-4.50792	-4.89014	0.143873	2.21912	2.17456	NA	NA	NA	NA	NA	NA	NA
chr1_11664000_11664600	0.0312004	0.0241649	0.00326585	-0.294522	-4.88595	-6.22789	0.132515	2.09569	2.0067	NA	NA	NA	NA	NA	NA	NA
chr1_116647200_116647800	0.343679	0.116919	0.0041871	0.132598	-3.13235	-5.75738	0.138588	1.96034	1.91038	NA	NA	NA	NA	NA	NA	NA
chr1_116647800_116648400	0.243599	0.092583	0.0219192	0.167372	-3.53147	-4.74796	0.141699	2.05598	2.00149	NA	NA	NA	NA	NA	NA	NA
chr1_116679000_116679600	0.344176	0.0363481	0.0654638	0.138874	-4.24996	-3.62532	0.145298	1.97125	1.9211	NA	NA	NA	NA	NA	NA	NA
chr1_116679600_116680200	0.0438601	0.0132381	0.00214107	0.253932	-4.44597	-5.4765	0.122532	1.72526	1.68342	NA	NA	NA	NA	NA	NA	NA
chr1_11670600_11671200	0.512457	0.0313013	0.183146	-0.0950557	-3.59472	-2.11893	0.143994	1.6184	1.56785	NA	NA	NA	NA	NA	NA	NA
chr1_116712600_116713200	0.551619	0.0138379	0.000657056	0.0735083	-5.06892	-6.93217	0.122566	1.98053	1.89642	NA	NA	NA	NA	NA	NA	NA
chr1_11673600_11674200	0.102043	0.119108	0.0051792	-0.216409	-2.80783	-5.05929	0.129717	1.76802	1.72334	NA	NA	NA	NA	NA	NA	NA
chr1_116740200_116740800	0.760967	0.275592	0.0888328	-0.0461646	-1.88178	-2.88882	0.150853	1.70544	1.6618	NA	NA	NA	NA	NA	NA	NA
chr1_116740800_116741400	0.691682	0.532383	0.0286216	-0.0576566	-0.99628	-3.44562	0.144475	1.58362	1.52484	NA	NA	NA	NA	NA	NA	NA
chr1_116741400_116742000	0.795756	0.0415761	0.00806801	0.0347424	-3.98719	-5.1337	0.133445	1.90195	1.85367	NA	NA	NA	NA	NA	NA	NA
chr1_11674200_11674800	0.182521	0.0259308	0.00017165	-0.14972	-4.03222	-6.97953	0.11062	1.75186	1.70647	NA	NA	NA	NA	NA	NA	NA
chr1_11674800_11675400	0.493408	0.0171073	0.000216935	-0.0759462	-4.30526	-6.80787	0.110002	1.74015	1.69535	NA	NA	NA	NA	NA	NA	NA
chr1_11675400_11676000	0.393401	0.00962249	0.00659624	0.11719	-5.99312	-6.044	0.136022	2.21814	2.12392	NA	NA	NA	NA	NA	NA	NA
chr1_116754000_116754600	0.000855725	0.050994	0.000480871	0.444977	-4.0699	-7.31244	0.124738	2.03104	1.94567	NA	NA	NA	NA	NA	NA	NA
chr1_116754600_116755200	0.252992	0.402703	0.00525276	0.166927	-1.85969	-6.31411	0.144198	2.20186	2.15459	NA	NA	NA	NA	NA	NA	NA
chr1_116758200_116758800	0.222021	0.216536	0.119748	-0.210356	-1.96479	2.4117	0.169925	1.56807	1.52129	0.168618	0.0301821	-4.37649	2.18476	-2.00319	0.0588959	0.0169489
chr1_116763000_116763600	0.880392	0.000751794	0.0380536	0.0192131	-6.61719	-3.81448	0.126978	1.83271	1.78602	NA	NA	NA	NA	NA	NA	NA
chr1_11676600_11677200	0.0163663	0.174972	0.0191689	-0.328252	-2.05626	-3.47898	0.131721	1.49258	1.43308	NA	NA	NA	NA	NA	NA	NA
chr1_11677200_11677800	0.140512	0.148221	0.000552234	-0.176721	-2.13081	-5.19852	0.117835	1.44899	1.40014	NA	NA	NA	NA	NA	NA	NA
chr1_11677800_11678400	0.381266	0.230326	0.00632667	0.126198	-2.56673	-5.89029	0.142751	2.11144	2.05859	NA	NA	NA	NA	NA	NA	NA
chr1_11679600_11680200	0.00986808	0.0954576	0.00391822	0.36294	-3.68087	-6.31669	0.134816	2.16236	2.07933	NA	NA	NA	NA	NA	NA	NA
chr1_11680200_11680800	0.30733	0.241139	0.0310063	0.158561	-2.10943	-3.84842	0.153601	1.77642	1.72943	NA	NA	NA	NA	NA	NA	NA
chr1_11680800_11681400	0.727257	0.0493055	0.159483	-0.0427884	-2.20277	1.52363	0.121935	1.09087	1.0655	0.0423055	0.0389926	-3.7264	1.52489	-2.44371	0.023934	0.00930395
chr1_11681400_11682000	0.524689	0.0330253	0.447118	-0.0694207	-2.55149	-0.867437	0.108297	1.16087	1.13124	NA	NA	NA	NA	NA	NA	NA
chr1_1168200_1168800	0.230531	0.147153	0.0118617	0.169935	-2.69842	-4.67521	0.139854	1.83005	1.7842	NA	NA	NA	NA	NA	NA	NA
chr1_11682000_11682600	0.952489	0.0351932	8.78173e-05	-0.00655074	-3.5119	-6.78444	0.109347	1.61827	1.57762	NA	NA	NA	NA	NA	NA	NA
chr1_116854200_116854800	0.0866963	0.380462	2.1085e-10	0.130574	-1.14558	-10.227	0.0745924	1.29363	1.26273	NA	NA	NA	NA	NA	NA	NA
chr1_116854800_116855400	0.0901418	0.0159366	2.05512e-07	0.0637679	-1.22864	-2.95601	0.0368374	0.490912	0.484674	NA	NA	NA	NA	NA	NA	NA
chr1_116855400_116856000	0.111874	0.0161326	2.95281e-07	0.0606704	-1.24031	-2.93746	0.0374302	0.496556	0.490065	NA	NA	NA	NA	NA	NA	NA
chr1_116856000_116856600	0.621201	0.14062	6.80485e-06	-0.0520982	-2.49772	-8.2376	0.104719	1.6659	1.62287	NA	NA	NA	NA	NA	NA	NA
chr1_1168800_1169400	0.621973	0.0539165	0.00613947	0.0673644	-3.69096	-5.22515	0.135705	1.86586	1.81898	NA	NA	NA	NA	NA	NA	NA
chr1_116909400_116910000	0.125252	0.0053161	0.00793575	0.192842	-4.97965	-4.60584	0.123496	1.70181	1.6593	NA	NA	NA	NA	NA	NA	NA
chr1_11692800_11693400	0.506417	0.00267486	0.00277598	-0.0775427	-5.23579	-5.08396	0.115793	1.6492	1.60805	NA	NA	NA	NA	NA	NA	NA
chr1_116928000_116928600	0.278173	0.0982206	0.014743	0.151336	-3.53255	-5.19957	0.137903	2.09301	2.05187	NA	NA	NA	NA	NA	NA	NA
chr1_116928600_116929200	0.343376	0.117596	0.0200607	0.136553	-3.43671	-5.08894	0.142631	2.1549	2.11255	NA	NA	NA	NA	NA	NA	NA
chr1_11693400_11694000	0.676875	0.0387517	0.00122717	-0.0497378	-3.2388	-5.03715	0.118592	1.52221	1.46197	NA	NA	NA	NA	NA	NA	NA
chr1_1169400_1170000	0.28216	0.333931	6.31249e-05	-0.120878	-1.35431	-5.93678	0.111077	1.38692	1.34843	NA	NA	NA	NA	NA	NA	NA
chr1_11694000_11694600	0.938662	0.113402	0.000200985	0.00910259	-2.52154	-6.16393	0.117645	1.56246	1.52574	NA	NA	NA	NA	NA	NA	NA
chr1_116944800_116945400	0.0906954	0.0237521	0.0305567	-0.231681	-3.97616	-3.70379	0.134075	1.70018	1.65974	NA	NA	NA	NA	NA	NA	NA
chr1_11694600_11695200	0.0817552	0.0501057	0.00429091	0.248544	-4.39283	-6.28218	0.139667	2.18341	2.09071	NA	NA	NA	NA	NA	NA	NA
chr1_116960400_116961000	0.872776	0.0476907	0.000302715	0.0186529	-3.76721	-7.09277	0.115836	1.85169	1.81459	NA	NA	NA	NA	NA	NA	NA
chr1_116961000_116961600	0.799181	0.0164725	0.0010247	0.0304476	-4.52674	-6.21333	0.11899	1.8184	1.77188	NA	NA	NA	NA	NA	NA	NA
chr1_11697000_11697600	0.430714	0.0733869	0.000283048	-0.0899301	-2.90337	-6.07276	0.113124	1.58457	1.54508	NA	NA	NA	NA	NA	NA	NA
chr1_11697600_11698200	0.697279	0.488165	2.30081e-05	0.0359971	-0.861432	-5.59971	0.0919607	1.23265	1.18864	NA	NA	NA	NA	NA	NA	NA
chr1_11698200_11698800	0.409617	0.0162419	0.000200118	0.090548	-3.68868	-5.75998	0.108811	1.47837	1.42527	NA	NA	NA	NA	NA	NA	NA
chr1_116986200_116986800	0.649562	0.0260552	0.0635326	-0.0555526	-3.24306	-2.57789	0.121463	1.41024	1.35584	NA	NA	NA	NA	NA	NA	NA
chr1_116986800_116987400	0.808898	0.0277533	0.243849	-0.0247795	-2.58848	-1.30895	0.101871	1.13889	1.10877	NA	NA	NA	NA	NA	NA	NA
chr1_116987400_116988000	0.319825	0.0161604	0.0137591	0.114988	-3.44683	-3.39904	0.114338	1.38031	1.3269	NA	NA	NA	NA	NA	NA	NA
chr1_116988000_116988600	0.168705	0.498772	7.21298e-07	0.0883061	-0.68347	-5.61992	0.0631492	1.00242	0.979972	NA	NA	NA	NA	NA	NA	NA
chr1_116988600_116989200	0.149773	0.324932	1.37958e-06	0.0856128	-0.870256	-4.74897	0.0584465	0.874614	0.856331	NA	NA	NA	NA	NA	NA	NA
chr1_116989200_116989800	0.322194	0.00341002	4.14302e-06	0.0898844	-4.93648	-8.14177	0.0898194	1.59858	1.55887	NA	NA	NA	NA	NA	NA	NA
chr1_1170000_1170600	0.530204	0.231148	0.000394323	-0.0762384	-1.90672	-5.86677	0.120539	1.57132	1.53455	NA	NA	NA	NA	NA	NA	NA
chr1_117002400_117003000	0.472178	0.401211	0.0124918	-0.11121	-1.97674	-5.90544	0.153412	2.33297	2.27137	NA	NA	NA	NA	NA	NA	NA
chr1_11700600_11701200	0.275172	0.0195477	0.000677382	-0.12673	-4.22547	-6.20349	0.114753	1.74636	1.70178	NA	NA	NA	NA	NA	NA	NA
chr1_11701200_11701800	0.428069	0.0752351	3.43533e-05	-0.0858437	-3.19098	-7.84099	0.107363	1.75309	1.70852	NA	NA	NA	NA	NA	NA	NA
chr1_117013800_117014400	0.111951	0.00595743	0.0038605	0.192764	-5.53708	-5.71845	0.118951	1.92007	1.87907	NA	NA	NA	NA	NA	NA	NA
chr1_11701800_11702400	0.863791	0.0719948	0.000671866	-0.0208383	-3.5808	-6.79217	0.120793	1.94447	1.86189	NA	NA	NA	NA	NA	NA	NA
chr1_117035400_117036000	0.602043	0.000375763	0.0128535	0.0589864	-5.88307	-3.87371	0.112336	1.53253	1.49641	NA	NA	NA	NA	NA	NA	NA
chr1_117036000_117036600	0.681287	0.00124763	0.0318115	0.0500851	-5.43029	-3.41308	0.121175	1.57866	1.54148	NA	NA	NA	NA	NA	NA	NA
chr1_11704200_11704800	0.82308	0.278308	0.000189276	-0.028183	-2.09937	-7.5612	0.125333	1.91357	1.86281	NA	NA	NA	NA	NA	NA	NA
chr1_11704800_11705400	0.969902	0.0383112	0.00120925	-0.00488817	-4.49861	-7.11052	0.128849	2.10929	2.06074	NA	NA	NA	NA	NA	NA	NA
chr1_117059400_117060000	0.12958	0.106322	0.000828546	-0.193136	-2.93908	-6.22476	0.125136	1.78425	1.73967	NA	NA	NA	NA	NA	NA	NA
chr1_1170600_1171200	0.586391	0.0213069	0.00558279	-0.0697006	-4.55811	-5.41381	0.127208	1.91197	1.86172	NA	NA	NA	NA	NA	NA	NA
chr1_117060000_117060600	0.0885991	0.111986	0.000310193	-0.203929	-2.56647	-6.02883	0.117222	1.58387	1.54551	NA	NA	NA	NA	NA	NA	NA
chr1_117060600_117061200	0.990136	0.0164941	0.000105672	0.00132258	-4.55851	-7.61262	0.106395	1.83155	1.79429	NA	NA	NA	NA	NA	NA	NA
chr1_11707200_11707800	0.120331	0.00383108	0.0222105	-0.192	-5.62335	-4.27558	0.121309	1.84614	1.80654	NA	NA	NA	NA	NA	NA	NA
chr1_11707800_11708400	0.00627498	0.00305213	0.0175893	-0.340061	-5.63343	-4.33265	0.11872	1.80109	1.75925	NA	NA	NA	NA	NA	NA	NA
chr1_117084000_117084600	0.441472	0.146562	0.000643567	0.0995345	-3.05207	-7.39924	0.128196	2.06678	2.02039	NA	NA	NA	NA	NA	NA	NA
chr1_11711400_11712000	0.0144096	0.000703726	0.0410818	-0.322037	-7.47591	-4.17833	0.126626	2.058	1.98805	NA	NA	NA	NA	NA	NA	NA
chr1_1171200_1171800	0.391692	0.18336	0.011348	0.121676	-2.44971	-4.66502	0.140715	1.8135	1.76859	NA	NA	NA	NA	NA	NA	NA
chr1_117121200_117121800	0.0971993	0.314738	0.00215886	0.214101	-1.66985	-5.20596	0.126456	1.64285	1.60169	NA	NA	NA	NA	NA	NA	NA
chr1_117121800_117122400	0.267839	0.486023	2.14531e-05	-0.117316	-0.922893	-5.97021	0.104595	1.31408	1.26162	NA	NA	NA	NA	NA	NA	NA
chr1_117122400_117123000	0.216757	0.0426977	0.00592308	-0.143887	-2.98719	-3.97324	0.11489	1.43308	1.37675	NA	NA	NA	NA	NA	NA	NA
chr1_117171600_117172200	0.661535	0.0573606	0.0639599	0.0662706	-3.85458	-3.65905	0.150395	1.97734	1.9277	NA	NA	NA	NA	NA	NA	NA
chr1_117172200_117172800	0.344822	0.0195642	0.0449707	0.128448	-4.15897	-3.45663	0.134571	1.71913	1.67708	NA	NA	NA	NA	NA	NA	NA
chr1_11719200_11719800	0.952022	0.00390419	0.00220691	0.00693537	-4.70544	-4.87897	0.114641	1.54827	1.50466	NA	NA	NA	NA	NA	NA	NA
chr1_11719800_11720400	0.919361	7.60087e-05	0.00869483	-0.0111243	-7.28353	-4.47798	0.109281	1.67619	1.63377	NA	NA	NA	NA	NA	NA	NA
chr1_117203400_117204000	0.706393	0.0921323	0.00183227	0.0526489	-3.90495	-7.19923	0.138896	2.27018	2.17661	NA	NA	NA	NA	NA	NA	NA
chr1_117204000_117204600	0.405046	0.0361398	0.000249989	0.10124	-4.37814	-7.72101	0.120471	2.02832	1.94471	NA	NA	NA	NA	NA	NA	NA
chr1_117210000_117210600	0.0751725	0.558123	0.112507	0.300033	0.983499	-2.59058	0.164798	1.66714	1.60114	0.431687	0.0286121	3.57408	2.3115	1.54622	0.13773	0.0313645
chr1_117210600_117211200	0.711624	0.782891	0.00945432	-0.0499923	-0.403494	-3.78723	0.134399	1.45576	1.39819	NA	NA	NA	NA	NA	NA	NA
chr1_117211200_117211800	0.959665	0.154528	0.00085207	0.00619234	-2.42581	-5.83039	0.121776	1.67583	1.63374	NA	NA	NA	NA	NA	NA	NA
chr1_11725800_11726400	0.64199	0.288315	0.000323617	0.058845	-1.92481	-6.78625	0.125736	1.79178	1.74579	NA	NA	NA	NA	NA	NA	NA
chr1_1173000_1173600	0.572963	0.113224	0.000554251	0.0699629	-2.84029	-6.36549	0.123228	1.75907	1.715	NA	NA	NA	NA	NA	NA	NA
chr1_11731200_11731800	0.0639273	0.00253022	0.000257854	-0.213876	-6.04775	-7.17923	0.112662	1.89322	1.81278	NA	NA	NA	NA	NA	NA	NA
chr1_11731800_11732400	0.0508508	0.00579451	0.00188994	-0.246212	-5.96321	-6.5333	0.12279	2.06045	1.98173	NA	NA	NA	NA	NA	NA	NA
chr1_11732400_11733000	0.841006	0.0531673	0.0427274	-0.0297639	-4.47905	-4.57297	0.147533	2.25687	2.19418	NA	NA	NA	NA	NA	NA	NA
chr1_11735400_11736000	0.302833	0.503248	7.01209e-05	0.123471	-1.00586	-6.33758	0.118489	1.49085	1.45016	NA	NA	NA	NA	NA	NA	NA
chr1_1173600_1174200	0.64862	0.0312188	0.0149636	-0.0622889	-3.7668	-4.14658	0.135799	1.695	1.64019	NA	NA	NA	NA	NA	NA	NA
chr1_11736000_11736600	0.506917	0.978218	0.0362497	0.0805204	-0.0356534	-2.71804	0.120382	1.29877	1.26	NA	NA	NA	NA	NA	NA	NA
chr1_11736600_11737200	0.358081	0.154581	0.0641451	0.123569	-2.14598	-2.70144	0.133109	1.48271	1.42423	NA	NA	NA	NA	NA	NA	NA
chr1_1174200_1174800	0.966356	0.399494	0.0073251	0.00546877	-1.25163	-3.96944	0.128951	1.47177	1.41454	NA	NA	NA	NA	NA	NA	NA
chr1_11745600_11746200	0.113871	0.160112	1.46495e-05	-0.174874	-2.3722	-7.84602	0.108505	1.66148	1.61872	NA	NA	NA	NA	NA	NA	NA
chr1_11746200_11746800	0.0207705	0.0162808	7.80691e-05	-0.26012	-4.59927	-7.70654	0.10863	1.84403	1.77694	NA	NA	NA	NA	NA	NA	NA
chr1_11747400_11748000	0.989873	0.391086	0.00228227	0.00132725	-1.0581	-3.80812	0.104005	1.22209	1.1787	NA	NA	NA	NA	NA	NA	NA
chr1_1174800_1175400	0.19579	0.260503	0.00265732	0.15385	-1.56778	-4.20178	0.1172	1.37617	1.32253	NA	NA	NA	NA	NA	NA	NA
chr1_11748000_11748600	0.79834	0.600642	0.000223432	-0.0266077	0.656107	-4.83104	0.10354	1.2447	1.20589	0.45946	0.00346484	5.48715	1.73305	3.16619	0.00485656	0.00354908
chr1_11748600_11749200	0.321731	0.800307	0.00138333	-0.114389	-0.342076	-4.40787	0.114195	1.34455	1.29471	NA	NA	NA	NA	NA	NA	NA
chr1_11749200_11749800	0.924689	0.042734	0.00470203	0.0123982	-3.85595	-5.3582	0.130442	1.8502	1.8033	NA	NA	NA	NA	NA	NA	NA
chr1_1175400_1176000	0.406819	0.000111166	0.000339211	0.0930004	-8.30972	-7.28857	0.111088	1.96594	1.88239	NA	NA	NA	NA	NA	NA	NA
chr1_11754600_11755200	0.300355	0.00453142	0.00551799	-0.129919	-5.90627	-5.62505	0.124031	1.97873	1.93149	NA	NA	NA	NA	NA	NA	NA
chr1_117563400_117564000	0.891856	0.130274	0.0135481	0.0176204	-2.72327	-4.42221	0.128889	1.76772	1.72218	NA	NA	NA	NA	NA	NA	NA
chr1_117564000_117564600	0.0477458	0.726367	6.7829e-05	0.251251	-0.619015	-7.50325	0.123529	1.75804	1.71286	NA	NA	NA	NA	NA	NA	NA
chr1_117564600_117565200	0.0453468	0.0223159	2.04631e-05	0.216116	-4.29759	-8.45056	0.105047	1.81736	1.78039	NA	NA	NA	NA	NA	NA	NA
chr1_117586800_117587400	0.931595	0.0469172	0.000776528	-0.0103676	-3.62014	-6.22036	0.120121	1.77292	1.72797	NA	NA	NA	NA	NA	NA	NA
chr1_117599400_117600000	0.0807096	0.00449882	0.00396949	0.215417	-5.73955	-5.71246	0.120622	1.92118	1.88335	NA	NA	NA	NA	NA	NA	NA
chr1_117600000_117600600	0.0753486	0.00978719	0.000450384	0.225821	-5.50191	-7.38785	0.124113	2.04129	1.95458	NA	NA	NA	NA	NA	NA	NA
chr1_117604800_117605400	0.63185	8.4081e-05	0.0804349	-0.0580406	-7.00121	-2.83117	0.120331	1.62292	1.58382	NA	NA	NA	NA	NA	NA	NA
chr1_117605400_117606000	0.293089	0.000813	0.141543	-0.136296	-5.37322	-2.1661	0.128154	1.49903	1.44816	NA	NA	NA	NA	NA	NA	NA
chr1_11761200_11761800	0.0907313	0.155465	0.000204872	0.210343	-2.81445	-7.70692	0.121741	1.94883	1.91056	NA	NA	NA	NA	NA	NA	NA
chr1_117612000_117612600	0.991592	0.954006	0.891464	0.00163411	-0.0853917	-0.19517	0.154222	1.47249	1.42242	NA	NA	NA	NA	NA	NA	NA
chr1_117612600_117613200	0.772427	0.66599	0.570072	-0.0445727	0.583281	0.74758	0.153218	1.34256	1.30684	0.500864	0.156315	-0.164299	1.87358	-0.0876923	0.930993	0.162565
chr1_11761800_11762400	0.286785	0.0246995	0.00129052	0.129792	-4.20624	-6.05065	0.120435	1.8113	1.76492	NA	NA	NA	NA	NA	NA	NA
chr1_117622800_117623400	0.692143	0.762768	2.50585e-07	-0.0398751	-0.42369	-8.23304	0.100076	1.39535	1.36273	NA	NA	NA	NA	NA	NA	NA
chr1_117623400_117624000	0.704266	0.799758	1.02832e-07	-0.0365782	-0.333429	-8.03948	0.0957703	1.30689	1.27628	NA	NA	NA	NA	NA	NA	NA
chr1_117629400_117630000	0.0796778	0.0519489	0.000391543	0.213307	-3.84663	-7.06152	0.11902	1.92783	1.84594	NA	NA	NA	NA	NA	NA	NA
chr1_11763000_11763600	0.336445	0.301883	0.00410997	0.140572	-2.38351	-6.68395	0.144716	2.28278	2.21286	NA	NA	NA	NA	NA	NA	NA
chr1_117630000_117630600	0.873773	0.0207647	0.000114051	0.0181768	-4.65289	-7.85282	0.113779	1.94303	1.86138	NA	NA	NA	NA	NA	NA	NA
chr1_117630600_117631200	0.527772	0.124076	1.6748e-05	-0.0672516	-2.68746	-8.04494	0.105702	1.71555	1.67365	NA	NA	NA	NA	NA	NA	NA
chr1_11763600_11764200	0.252133	0.132422	0.000145093	0.134568	-2.82354	-7.46265	0.116032	1.8433	1.80119	NA	NA	NA	NA	NA	NA	NA
chr1_11764200_11764800	0.893347	0.561589	0.000313882	0.0174321	-1.08574	-7.04945	0.129305	1.85684	1.80891	NA	NA	NA	NA	NA	NA	NA
chr1_11765400_11766000	0.983767	0.644799	4.31826e-05	-0.00234948	-0.676267	-6.43223	0.114851	1.45731	1.42323	NA	NA	NA	NA	NA	NA	NA
chr1_11766000_11766600	0.886075	0.837673	3.88527e-05	-0.0169619	0.284795	-6.10048	0.117734	1.38227	1.34024	0.586099	0.00192326	6.38528	1.92533	3.31645	0.0034438	0.00292066
chr1_11766600_11767200	0.758613	0.508486	9.5122e-05	-0.0376655	0.987222	-6.18463	0.121841	1.48144	1.44652	0.397563	0.00253614	7.17185	2.07052	3.46379	0.00245219	0.00240181
chr1_11767200_11767800	0.988661	0.477076	0.00498158	0.00204196	-1.50471	-6.05874	0.142905	2.09899	2.05374	NA	NA	NA	NA	NA	NA	NA
chr1_117672000_117672600	0.0080568	0.208185	0.00122422	-0.356432	-2.55124	-6.75098	0.128675	1.99862	1.95892	NA	NA	NA	NA	NA	NA	NA
chr1_117674400_117675000	0.281079	0.199164	0.0277251	-0.163258	-2.58161	-4.391	0.149681	1.98176	1.93159	NA	NA	NA	NA	NA	NA	NA
chr1_117698400_117699000	0.817409	0.44697	0.390027	-0.037697	-1.2485	-1.36042	0.162344	1.62766	1.56774	NA	NA	NA	NA	NA	NA	NA
chr1_117708600_117709200	0.153499	0.0293208	0.00590898	-0.179097	-4.26382	-5.34952	0.12341	1.89561	1.85307	NA	NA	NA	NA	NA	NA	NA
chr1_11776800_11777400	0.972544	0.148678	0.000309359	0.00401894	-2.70989	-7.03462	0.116137	1.84491	1.80294	NA	NA	NA	NA	NA	NA	NA
chr1_1177800_1178400	0.0430572	0.013629	0.000584014	0.251778	-5.08518	-7.01197	0.121007	1.9822	1.898	NA	NA	NA	NA	NA	NA	NA
chr1_11778000_11778600	0.882618	0.0454656	0.00084247	0.0189974	-4.29354	-7.15373	0.127952	2.08814	2.00242	NA	NA	NA	NA	NA	NA	NA
chr1_11778600_11779200	0.434263	0.0172852	0.000346241	0.0965652	-5.04296	-7.55691	0.122417	2.04179	1.95505	NA	NA	NA	NA	NA	NA	NA
chr1_11779800_11780400	0.491364	0.0765566	0.00215867	0.0898949	-3.75127	-6.49451	0.12959	2.07054	1.99811	NA	NA	NA	NA	NA	NA	NA
chr1_117825000_117825600	0.0291167	0.308119	0.00139809	0.304538	-1.95984	-6.30289	0.135212	1.90166	1.85331	NA	NA	NA	NA	NA	NA	NA
chr1_117825600_117826200	0.0027563	0.302192	0.000865573	0.412079	-1.91155	-6.36214	0.130236	1.83196	1.78538	NA	NA	NA	NA	NA	NA	NA
chr1_11783400_11784000	0.833101	0.237505	0.00156235	-0.0270232	-2.32681	-6.40673	0.127513	1.94415	1.90524	NA	NA	NA	NA	NA	NA	NA
chr1_1178400_1179000	0.879599	0.149474	0.00906731	-0.0219546	-2.72916	-4.94809	0.144133	1.86175	1.81596	NA	NA	NA	NA	NA	NA	NA
chr1_11784600_11785200	0.590423	0.253293	0.0035938	-0.0779376	-2.06552	-5.34965	0.143792	1.78543	1.74306	NA	NA	NA	NA	NA	NA	NA
chr1_11785200_11785800	0.0806933	0.0623783	0.000675061	-0.214575	-3.38155	-6.28922	0.120144	1.77045	1.72476	NA	NA	NA	NA	NA	NA	NA
chr1_11787000_11787600	0.249554	0.168686	0.000315969	0.130352	-1.93486	-5.17718	0.111778	1.38359	1.32921	NA	NA	NA	NA	NA	NA	NA
chr1_11787600_11788200	0.898215	0.281934	0.00211577	0.0160301	-1.58544	-4.55999	0.124626	1.4562	1.3999	NA	NA	NA	NA	NA	NA	NA
chr1_11790600_11791200	0.522656	0.0525506	0.000237234	-0.0697453	-2.85532	-5.58304	0.108269	1.43483	1.4003	NA	NA	NA	NA	NA	NA	NA
chr1_11791200_11791800	0.372844	0.0667598	0.000306334	-0.0986261	-2.69978	-5.48302	0.109593	1.43776	1.40413	NA	NA	NA	NA	NA	NA	NA
chr1_117928800_117929400	0.0504599	0.059459	0.299846	-0.253854	-2.65428	-1.39444	0.126378	1.37345	1.32983	NA	NA	NA	NA	NA	NA	NA
chr1_117929400_117930000	0.000787277	0.0917813	0.14093	-0.379275	-2.00919	-1.70022	0.105495	1.16676	1.1349	NA	NA	NA	NA	NA	NA	NA
chr1_117930000_117930600	0.0099637	0.00460786	0.00940955	-0.312786	-4.39379	-3.85301	0.116347	1.47505	1.42151	NA	NA	NA	NA	NA	NA	NA
chr1_1179600_1180200	0.50419	0.174471	0.996273	-0.101836	-2.02811	-0.00672552	0.151273	1.47039	1.4322	NA	NA	NA	NA	NA	NA	NA
chr1_11797800_11798400	0.59294	8.907e-05	1.21907e-08	0.0794597	3.45577	5.46416	0.147602	0.804413	0.790155	0.00277473	0.000861554	-2.00838	1.12758	-1.78115	0.0900819	0.0227787
chr1_11800200_11800800	0.068906	0.0372878	0.00665294	-0.247553	-4.27929	-5.52228	0.132905	1.99526	1.94278	NA	NA	NA	NA	NA	NA	NA
chr1_11800800_11801400	0.109971	0.00613346	0.00448283	-0.19006	-4.63922	-4.70821	0.116616	1.61481	1.57528	NA	NA	NA	NA	NA	NA	NA
chr1_11802600_11803200	0.630691	0.0872977	9.53847e-07	-0.0452368	-2.39372	-7.56466	0.093467	1.37014	1.33807	NA	NA	NA	NA	NA	NA	NA
chr1_11803200_11803800	0.657012	0.104138	0.000337234	-0.0464357	-2.24903	-5.05991	0.103896	1.35654	1.30616	NA	NA	NA	NA	NA	NA	NA
chr1_11803800_11804400	0.753233	0.00503426	0.00278618	0.0366306	-4.75024	-4.97423	0.115823	1.61232	1.57399	NA	NA	NA	NA	NA	NA	NA
chr1_11806200_11806800	0.253414	0.14452	2.12601e-09	0.143183	0.866358	4.30214	0.123799	0.583639	0.579651	0.112473	0.000799597	-3.43578	0.822576	-4.17686	0.000465223	0.000947808
chr1_1181400_1182000	0.20993	0.21042	0.0101326	-0.17261	-2.34138	-4.81781	0.13575	1.84341	1.79644	NA	NA	NA	NA	NA	NA	NA
chr1_118184400_118185000	0.65222	0.525106	0.961634	-0.0648109	-0.876251	0.0643083	0.142869	1.36834	1.32962	0.408584	0.278768	-0.940559	1.90795	-0.492969	0.627403	0.112683
chr1_118185000_118185600	0.1454	0.938458	0.000642784	-0.152733	-0.0551957	2.55553	0.103123	0.710994	0.69772	0.621627	0.00511717	-2.61073	0.996155	-2.6208	0.0163725	0.00730674
chr1_118185600_118186200	0.65361	0.00318594	0.0433407	-0.0605192	-3.83783	2.49693	0.133982	1.23307	1.20175	0.00696931	0.0155046	-6.33476	1.72182	-3.67911	0.00148786	0.0018432
chr1_11823000_11823600	0.86718	0.0125473	0.028256	0.0229461	-4.9541	-4.20931	0.136439	1.90674	1.85829	NA	NA	NA	NA	NA	NA	NA
chr1_11823600_11824200	0.951166	0.00256586	0.00841116	0.00744082	-5.60452	-4.716	0.120837	1.75719	1.71268	NA	NA	NA	NA	NA	NA	NA
chr1_118258800_118259400	0.0549789	0.0377118	0.000256076	0.234143	-4.19597	-7.44037	0.118908	1.96097	1.87767	NA	NA	NA	NA	NA	NA	NA
chr1_11827200_11827800	0.287708	0.210668	0.000122588	0.125004	-2.27656	-7.35124	0.116216	1.79336	1.75188	NA	NA	NA	NA	NA	NA	NA
chr1_11827800_11828400	0.946072	0.472307	3.3509e-06	0.00728422	-1.0888	-7.74364	0.107104	1.50242	1.46509	NA	NA	NA	NA	NA	NA	NA
chr1_11828400_11829000	0.72035	0.00574322	0.00682437	-0.0424491	-4.39434	-4.19618	0.117851	1.51663	1.48123	NA	NA	NA	NA	NA	NA	NA
chr1_11829000_11829600	0.350937	0.0411042	0.0229332	-0.132918	-3.80592	-4.15899	0.14105	1.81107	1.76726	NA	NA	NA	NA	NA	NA	NA
chr1_1183200_1183800	0.674754	0.00567973	0.00280942	0.0489316	-4.82283	-5.11645	0.115862	1.66215	1.6205	NA	NA	NA	NA	NA	NA	NA
chr1_11837400_11838000	0.026202	0.035771	0.00247436	-0.280905	-3.73216	-5.3854	0.122278	1.72545	1.68172	NA	NA	NA	NA	NA	NA	NA
chr1_1183800_1184400	0.17778	0.0257716	1.83059e-05	0.138177	-4.01079	-8.15461	0.100965	1.74058	1.70597	NA	NA	NA	NA	NA	NA	NA
chr1_11838000_11838600	0.0132792	0.010568	0.000128034	-0.26908	-4.33484	-6.64148	0.104466	1.62627	1.58791	NA	NA	NA	NA	NA	NA	NA
chr1_11838600_11839200	0.0136824	0.0073375	5.99239e-05	-0.255013	-4.4598	-6.85995	0.0994642	1.58965	1.55245	NA	NA	NA	NA	NA	NA	NA
chr1_11839800_11840400	0.370965	0.0538754	0.000232446	-0.111616	-4.18717	-8.28391	0.123537	2.11633	2.07432	NA	NA	NA	NA	NA	NA	NA
chr1_11840400_11841000	0.944424	0.0134902	3.30376e-05	-0.00743203	-4.84397	-8.44445	0.106032	1.88518	1.83526	NA	NA	NA	NA	NA	NA	NA
chr1_11841000_11841600	0.640147	0.0246675	8.21787e-05	-0.0524511	-4.43171	-8.00861	0.111455	1.90794	1.85339	NA	NA	NA	NA	NA	NA	NA
chr1_11841600_11842200	0.297004	0.0234453	0.801572	-0.158913	2.9879	-0.314192	0.150651	1.27464	1.243	0.0235204	0.231582	3.30209	1.78038	1.85471	0.0784412	0.0206633
chr1_11842200_11842800	0.78768	0.00445502	0.322837	-0.0393015	3.09347	1.01229	0.145078	1.03423	1.01292	0.00824129	0.0808769	2.08118	1.44763	1.43764	0.165998	0.0364071
chr1_11842800_11843400	0.508364	0.51603	0.758841	-0.0903291	0.781313	-0.359646	0.13551	1.1937	1.16452	0.402616	0.218112	1.14096	1.66765	0.684173	0.501717	0.0919027
chr1_1184400_1185000	0.890801	0.188544	7.93297e-05	-0.0154996	-2.33271	-7.39906	0.112273	1.74775	1.708	NA	NA	NA	NA	NA	NA	NA
chr1_11845800_11846400	0.0877448	0.0490471	0.00115086	0.23197	-4.46893	-7.4216	0.13297	2.2105	2.14046	NA	NA	NA	NA	NA	NA	NA
chr1_11847000_11847600	0.439746	0.000323801	0.0102689	-0.0879847	-7.04387	-4.75304	0.112891	1.81215	1.77572	NA	NA	NA	NA	NA	NA	NA
chr1_11847600_11848200	0.565352	0.0468779	0.000106612	-0.0630875	-3.18512	-6.45062	0.108942	1.55958	1.5214	NA	NA	NA	NA	NA	NA	NA
chr1_11848200_11848800	0.68104	0.0748651	4.63265e-06	0.0418389	-3.11127	-8.62306	0.101142	1.70705	1.66152	NA	NA	NA	NA	NA	NA	NA
chr1_11849400_11850000	0.186037	0.0420428	0.000236534	0.161167	-4.19741	-7.70043	0.120054	2.00701	1.93091	NA	NA	NA	NA	NA	NA	NA
chr1_1185000_1185600	0.908248	0.427144	0.000905489	0.0135708	-1.11201	-4.73012	0.117106	1.38797	1.33306	NA	NA	NA	NA	NA	NA	NA
chr1_11850000_11850600	0.0102256	0.119386	7.06675e-05	0.3156	-2.96384	-7.94334	0.117835	1.8677	1.81859	NA	NA	NA	NA	NA	NA	NA
chr1_11850600_11851200	0.0390025	0.0334096	0.000192708	0.255016	-4.45052	-7.91973	0.120017	2.02953	1.95388	NA	NA	NA	NA	NA	NA	NA
chr1_1185600_1186200	0.500847	0.375951	0.00137647	0.0804948	-1.22803	-4.49221	0.118635	1.37356	1.31882	NA	NA	NA	NA	NA	NA	NA
chr1_11858400_11859000	0.446147	0.0166291	0.000183827	-0.0865145	-4.27511	-6.81997	0.112583	1.71997	1.67636	NA	NA	NA	NA	NA	NA	NA
chr1_11859000_11859600	0.437969	0.172065	0.000440401	-0.0948083	-2.15936	-5.75733	0.121171	1.55664	1.52025	NA	NA	NA	NA	NA	NA	NA
chr1_11877600_11878200	0.346744	0.118867	0.000907721	-0.11758	-2.67623	-5.82563	0.123683	1.68403	1.64218	NA	NA	NA	NA	NA	NA	NA
chr1_11878200_11878800	0.536998	0.903225	0.00152264	-0.0741393	-0.163491	-4.34114	0.119191	1.33723	1.28757	NA	NA	NA	NA	NA	NA	NA
chr1_11878800_11879400	0.448597	0.574024	0.00205924	-0.0944864	0.746895	-4.1529	0.123626	1.31919	1.27123	0.442584	0.00706857	4.8998	1.83202	2.67454	0.0145663	0.00681742
chr1_11879400_11880000	0.802278	0.310349	0.0115317	0.0372774	1.55535	-3.84189	0.148014	1.51623	1.46001	0.243445	0.0101564	5.39724	2.1049	2.56414	0.0185052	0.00789458
chr1_11880000_11880600	0.128716	0.112407	0.00187553	0.196526	-2.99174	-5.93919	0.127037	1.84855	1.80007	NA	NA	NA	NA	NA	NA	NA
chr1_11880600_11881200	0.593123	0.000511991	0.407628	0.0747012	-6.75303	-1.47205	0.138832	1.80671	1.7614	NA	NA	NA	NA	NA	NA	NA
chr1_11881200_11881800	0.101682	0.00121558	0.843557	0.245417	-5.79952	0.325976	0.146944	1.68166	1.6425	0.00476165	0.244482	-6.1255	2.3507	-2.60582	0.0169126	0.0074627
chr1_11882400_11883000	0.0286579	0.22719	0.00201345	-0.285561	-2.40149	-6.27266	0.126404	1.96203	1.91549	NA	NA	NA	NA	NA	NA	NA
chr1_11885400_11886000	0.172996	0.287124	6.64313e-05	0.165422	-2.01543	-7.99206	0.119514	1.87145	1.82177	NA	NA	NA	NA	NA	NA	NA
chr1_11886000_11886600	0.632499	0.381166	0.000219415	-0.0596182	-1.65645	-7.31578	0.123838	1.87331	1.82348	NA	NA	NA	NA	NA	NA	NA
chr1_11888400_11889000	0.00594863	0.959225	0.00588193	-0.41066	0.0862394	-4.73322	0.142375	1.67765	1.63861	0.628148	0.00885253	4.81945	2.34512	2.0551	0.0531648	0.0158072
chr1_118884000_118884600	0.310093	0.0736007	0.0020586	0.133745	-3.86941	-6.69214	0.130311	2.11343	2.04844	NA	NA	NA	NA	NA	NA	NA
chr1_118884600_118885200	0.533404	0.0152114	0.000399562	0.0709147	-4.80924	-7.13718	0.113003	1.90728	1.86895	NA	NA	NA	NA	NA	NA	NA
chr1_11889000_11889600	0.524274	0.883456	0.0020937	-0.0885232	-0.241655	-5.2204	0.137958	1.63939	1.60084	NA	NA	NA	NA	NA	NA	NA
chr1_11891400_11892000	0.834503	0.138344	0.00544813	0.021084	-1.92339	-3.61149	0.100344	1.2753	1.23808	NA	NA	NA	NA	NA	NA	NA
chr1_11892000_11892600	0.852187	0.335872	0.39692	0.0130536	-0.629693	-0.543497	0.0696639	0.64748	0.635585	NA	NA	NA	NA	NA	NA	NA
chr1_11892600_11893200	0.457529	0.740941	0.00376917	-0.0784578	-0.418369	-3.72771	0.104717	1.25784	1.22144	NA	NA	NA	NA	NA	NA	NA
chr1_118964400_118965000	0.212984	0.42693	0.0583139	0.236041	1.17561	2.76517	0.186902	1.46666	1.42412	0.335288	0.0180412	-1.58956	2.04431	-0.777553	0.445933	0.0829613
chr1_118983600_118984200	0.370127	4.72642e-05	0.0260766	-0.09374	-6.65716	-3.27612	0.103569	1.48207	1.42483	NA	NA	NA	NA	NA	NA	NA
chr1_118984200_118984800	0.0988784	5.68667e-07	0.270668	-0.171146	-7.8288	-1.44379	0.101607	1.34889	1.29496	NA	NA	NA	NA	NA	NA	NA
chr1_118984800_118985400	0.324916	0.00147425	0.00715913	-0.112083	-4.92833	-3.95371	0.11264	1.45693	1.4046	NA	NA	NA	NA	NA	NA	NA
chr1_118985400_118986000	0.0634381	0.0243226	0.00111791	-0.224417	-3.60786	-5.23417	0.117988	1.54931	1.5053	NA	NA	NA	NA	NA	NA	NA
chr1_11898600_11899200	0.179142	0.0647956	0.000677546	-0.163691	-3.12224	-5.86815	0.119991	1.65024	1.60982	NA	NA	NA	NA	NA	NA	NA
chr1_118987200_118987800	0.221967	0.0674722	0.00504632	-0.159628	-3.71316	-5.7234	0.128932	1.98279	1.94321	NA	NA	NA	NA	NA	NA	NA
chr1_118988400_118989000	0.767973	0.0040908	0.0195318	-0.0382052	-5.36292	-4.18844	0.128734	1.77451	1.73082	NA	NA	NA	NA	NA	NA	NA
chr1_118989000_118989600	0.474886	0.000315328	0.0185972	-0.0803723	-5.80987	-3.49691	0.111557	1.4914	1.43314	NA	NA	NA	NA	NA	NA	NA
chr1_118989600_118990200	0.170865	0.0399709	0.175538	-0.135032	-2.27091	-1.4414	0.0970637	1.07426	1.04767	NA	NA	NA	NA	NA	NA	NA
chr1_118990200_118990800	0.104767	0.0354113	0.111864	-0.201207	-2.9772	-2.15124	0.121589	1.3736	1.32716	NA	NA	NA	NA	NA	NA	NA
chr1_11899200_11899800	0.243743	0.0383975	0.00490921	-0.151235	-3.82697	-5.1711	0.128076	1.79521	1.74966	NA	NA	NA	NA	NA	NA	NA
chr1_118992600_118993200	0.0381098	0.0404108	0.00114836	0.275582	-4.23261	-6.78263	0.129072	2.00687	1.95576	NA	NA	NA	NA	NA	NA	NA
chr1_118993200_118993800	0.593565	0.00314728	3.13096e-05	0.0516147	-5.41349	-7.81588	0.0960411	1.73687	1.69263	NA	NA	NA	NA	NA	NA	NA
chr1_118993800_118994400	0.420062	0.00232056	6.35173e-06	0.0763589	-6.41453	-9.73442	0.0938527	1.98904	1.91006	NA	NA	NA	NA	NA	NA	NA
chr1_118994400_118995000	0.101612	0.0262982	0.000161314	0.199642	-4.78415	-8.22435	0.119511	2.08395	2.0012	NA	NA	NA	NA	NA	NA	NA
chr1_118999200_118999800	0.810784	0.000247317	0.0028192	-0.0259697	-6.62441	-5.13136	0.10785	1.66706	1.62586	NA	NA	NA	NA	NA	NA	NA
chr1_118999800_119000400	0.996667	0.00925675	0.000204628	0.000460921	-4.77272	-6.90756	0.109746	1.75673	1.71224	NA	NA	NA	NA	NA	NA	NA
chr1_119000400_119001000	0.697728	0.00929539	0.238247	-0.0511253	-3.97201	-1.68005	0.130812	1.46287	1.40601	NA	NA	NA	NA	NA	NA	NA
chr1_119001000_119001600	0.968182	0.111086	0.023593	0.00538965	-2.47403	-3.4238	0.134383	1.52288	1.46224	NA	NA	NA	NA	NA	NA	NA
chr1_119001600_119002200	0.72162	0.12695	0.00958961	0.0486663	-2.43212	-4.07593	0.135755	1.56471	1.50782	NA	NA	NA	NA	NA	NA	NA
chr1_119002200_119002800	0.857751	0.0206425	0.0161824	0.0241472	-3.99167	-4.05881	0.133968	1.6652	1.62574	NA	NA	NA	NA	NA	NA	NA
chr1_119005800_119006400	0.0352024	0.025445	0.000118351	0.2486	-4.42525	-7.76057	0.11456	1.91596	1.84458	NA	NA	NA	NA	NA	NA	NA
chr1_119006400_119007000	0.360493	0.0875255	0.0017121	0.124492	-3.19138	-5.94698	0.134784	1.82807	1.78531	NA	NA	NA	NA	NA	NA	NA
chr1_11907600_11908200	0.0752769	0.0557285	0.000128504	0.212824	-3.92569	-8.08674	0.11694	2.00002	1.93398	NA	NA	NA	NA	NA	NA	NA
chr1_119139600_119140200	0.982784	0.0669822	3.56755e-06	0.00207196	-2.59982	-7.067	0.0954971	1.3857	1.34176	NA	NA	NA	NA	NA	NA	NA
chr1_119140200_119140800	0.241676	0.249487	3.14291e-06	-0.103115	-1.37722	-6.02076	0.0869367	1.18081	1.13507	NA	NA	NA	NA	NA	NA	NA
chr1_119140800_119141400	0.0496232	0.000240724	0.00260692	-0.210596	-6.64461	-5.17196	0.104445	1.66851	1.62443	NA	NA	NA	NA	NA	NA	NA
chr1_11919000_11919600	0.917853	0.0433246	0.0010979	-0.0126772	-3.86673	-6.3164	0.122241	1.86088	1.81335	NA	NA	NA	NA	NA	NA	NA
chr1_11922600_11923200	0.11941	0.0673974	5.15663e-07	-0.142451	-2.7257	-8.27402	0.0897736	1.45509	1.41865	NA	NA	NA	NA	NA	NA	NA
chr1_11923200_11923800	0.0743365	0.0578176	1.99661e-06	-0.171971	-2.98527	-8.13244	0.0941771	1.53431	1.49561	NA	NA	NA	NA	NA	NA	NA
chr1_11929200_11929800	0.312191	8.88802e-05	0.00341902	0.111257	-8.12134	-5.59996	0.108877	1.89014	1.81399	NA	NA	NA	NA	NA	NA	NA
chr1_11929800_11930400	0.657773	0.00791497	0.000208744	0.0481097	-4.68469	-6.62414	0.107898	1.6871	1.64457	NA	NA	NA	NA	NA	NA	NA
chr1_11930400_11931000	0.778234	0.00868605	0.000291269	0.0319732	-5.26515	-7.33137	0.112869	1.9207	1.86969	NA	NA	NA	NA	NA	NA	NA
chr1_119317800_119318400	0.845515	0.021002	0.0927893	0.0281416	-5.01407	-3.51257	0.143619	2.09797	2.04631	NA	NA	NA	NA	NA	NA	NA
chr1_119318400_119319000	0.496778	0.0557668	0.0791182	-0.100088	-3.86018	-3.44179	0.146113	1.96697	1.91674	NA	NA	NA	NA	NA	NA	NA
chr1_119328000_119328600	0.717087	0.0712032	0.000624152	0.0441744	-3.63978	-7.05839	0.121161	1.97079	1.92199	NA	NA	NA	NA	NA	NA	NA
chr1_119332200_119332800	0.557682	0.157467	0.00067412	-0.0735152	-2.76418	-6.8768	0.124477	1.9235	1.88566	NA	NA	NA	NA	NA	NA	NA
chr1_11934000_11934600	0.0128954	0.822787	1.76741e-05	0.290014	-0.311961	-6.48005	0.112088	1.38499	1.35265	NA	NA	NA	NA	NA	NA	NA
chr1_11934600_11935200	0.951148	0.334045	0.000646724	-0.00758497	-1.59556	-5.83276	0.123132	1.63438	1.59336	NA	NA	NA	NA	NA	NA	NA
chr1_11936400_11937000	0.361453	0.0741902	7.15888e-05	-0.103795	-3.12832	-7.28039	0.112603	1.71228	1.66834	NA	NA	NA	NA	NA	NA	NA
chr1_11937000_11937600	0.699469	0.241474	5.22626e-06	0.0411854	-1.77614	-7.53091	0.106023	1.49683	1.46112	NA	NA	NA	NA	NA	NA	NA
chr1_11937600_11938200	0.022961	0.0807947	0.000513456	0.286863	-3.40078	-6.95846	0.121922	1.90481	1.86214	NA	NA	NA	NA	NA	NA	NA
chr1_119382600_119383200	0.40036	0.0732106	0.0035356	0.108308	-3.27784	-5.35842	0.127594	1.78781	1.74257	NA	NA	NA	NA	NA	NA	NA
chr1_119414400_119415000	0.0519823	0.362953	0.000383024	0.256435	-1.80783	-7.35905	0.128537	1.96744	1.92013	NA	NA	NA	NA	NA	NA	NA
chr1_119415000_119415600	0.141358	0.452571	0.000458298	0.195036	-1.48713	-7.21546	0.13033	1.96302	1.91185	NA	NA	NA	NA	NA	NA	NA
chr1_119466000_119466600	0.511377	0.295085	0.00441419	0.0923959	-2.24784	-6.22196	0.139605	2.12242	2.07782	NA	NA	NA	NA	NA	NA	NA
chr1_119466600_119467200	0.240908	0.112093	0.000520811	0.13978	-2.89985	-6.52471	0.117654	1.79017	1.74825	NA	NA	NA	NA	NA	NA	NA
chr1_11949600_11950200	0.606059	0.0335299	0.00165586	-0.0631639	-4.01792	-5.96967	0.121639	1.83357	1.78592	NA	NA	NA	NA	NA	NA	NA
chr1_11950200_11950800	0.701535	0.017422	0.0343891	-0.0500481	-3.8675	-3.33248	0.129776	1.56791	1.52847	NA	NA	NA	NA	NA	NA	NA
chr1_11956800_11957400	0.676193	0.261192	0.00236742	0.0575159	-2.45507	-6.76813	0.136831	2.15818	2.10328	NA	NA	NA	NA	NA	NA	NA
chr1_11957400_11958000	0.110855	0.0128344	0.000104139	-0.18392	-5.18489	-8.14353	0.113136	2.00246	1.91736	NA	NA	NA	NA	NA	NA	NA
chr1_1195800_1196400	0.218459	0.163222	0.00683241	0.18057	-3.22618	-6.3122	0.144724	2.27678	2.22853	NA	NA	NA	NA	NA	NA	NA
chr1_11958000_11958600	0.528962	0.00413501	0.00164323	-0.0728867	-5.62765	-6.07244	0.114891	1.86452	1.81523	NA	NA	NA	NA	NA	NA	NA
chr1_119600400_119601000	0.76297	0.0860315	0.000460244	-0.0372492	-3.45845	-7.2731	0.122782	1.97138	1.92783	NA	NA	NA	NA	NA	NA	NA
chr1_119601000_119601600	0.349609	0.0942509	0.000410873	0.11237	-3.23554	-7.03325	0.118913	1.8936	1.84613	NA	NA	NA	NA	NA	NA	NA
chr1_119622000_119622600	0.470657	0.003473	0.00434543	-0.0849665	-4.82014	-4.57497	0.116806	1.56425	1.52489	NA	NA	NA	NA	NA	NA	NA
chr1_119622600_119623200	0.345958	0.00274308	0.00143505	-0.103802	-4.72282	-4.91428	0.10901	1.49182	1.44882	NA	NA	NA	NA	NA	NA	NA
chr1_119625600_119626200	0.105306	0.0257792	0.000166204	0.196985	-4.75037	-8.09408	0.119227	2.06165	1.97404	NA	NA	NA	NA	NA	NA	NA
chr1_119626200_119626800	0.955197	0.0416422	0.000529163	-0.00693421	-4.21105	-7.17077	0.122755	2.00941	1.92406	NA	NA	NA	NA	NA	NA	NA
chr1_119631000_119631600	0.025946	0.162795	0.450531	0.364773	-2.38375	-1.23319	0.158498	1.68052	1.62046	NA	NA	NA	NA	NA	NA	NA
chr1_119631600_119632200	0.560605	0.066728	0.023217	0.0795483	-3.1214	-3.81202	0.135701	1.6621	1.62337	NA	NA	NA	NA	NA	NA	NA
chr1_11963400_11964000	0.254806	0.0308805	0.000271855	-0.13736	-4.45217	-7.56806	0.119118	1.99917	1.91919	NA	NA	NA	NA	NA	NA	NA
chr1_1196400_1197000	0.576631	0.121526	0.00396929	0.0762386	-3.38068	-6.36238	0.13558	2.14303	2.09761	NA	NA	NA	NA	NA	NA	NA
chr1_11964000_11964600	0.753702	0.0139701	0.000114393	-0.0347343	-4.82556	-7.7248	0.110044	1.88824	1.83144	NA	NA	NA	NA	NA	NA	NA
chr1_119646600_119647200	0.340784	0.0404524	0.000202979	-0.108747	-3.75797	-7.01859	0.112973	1.7822	1.73865	NA	NA	NA	NA	NA	NA	NA
chr1_119647200_119647800	0.243407	0.0422206	0.000168166	-0.134292	-3.75749	-7.17298	0.113646	1.79828	1.75098	NA	NA	NA	NA	NA	NA	NA
chr1_119697000_119697600	0.372951	0.4712	0.0175607	-0.139587	-1.60147	-5.31515	0.155144	2.20431	2.15761	NA	NA	NA	NA	NA	NA	NA
chr1_119712000_119712600	0.154385	0.000315793	0.000124514	-0.183949	-3.81317	4.01923	0.127033	0.978965	0.958947	0.00323742	0.00278857	-7.8324	1.37038	-5.71548	1.35909e-05	0.000199384
chr1_119712600_119713200	0.144285	0.240117	1.99201e-06	-0.235678	-1.18466	5.31147	0.158674	0.995443	0.976693	0.187231	0.00111872	-6.49613	1.39457	-4.65815	0.000151439	0.000510228
chr1_119713200_119713800	0.154696	0.000415086	0.581655	-0.204046	-6.23949	-0.886153	0.14102	1.63921	1.59698	NA	NA	NA	NA	NA	NA	NA
chr1_119734800_119735400	0.849592	0.156079	0.0238491	0.0279199	-2.74867	-4.34293	0.1464	1.90617	1.85837	NA	NA	NA	NA	NA	NA	NA
chr1_119736600_119737200	0.775018	0.0737575	0.0026468	0.0315091	-2.52473	-4.22381	0.109596	1.37976	1.32887	NA	NA	NA	NA	NA	NA	NA
chr1_119737200_119737800	0.712441	0.538727	0.00263174	-0.040341	-0.787986	-3.91521	0.108776	1.27224	1.231	NA	NA	NA	NA	NA	NA	NA
chr1_119737800_119738400	0.543196	0.963803	0.00019574	0.0779293	0.0686841	-5.92708	0.127223	1.50526	1.46407	0.6295	0.00329989	5.99576	2.09983	2.85535	0.00978	0.00535805
chr1_119738400_119739000	0.762251	0.673784	2.83961e-06	0.032947	0.558864	-6.76174	0.108262	1.31912	1.26763	0.505287	0.00115777	7.32061	1.82947	4.00149	0.000701083	0.00120884
chr1_119739000_119739600	0.24217	0.993771	9.74921e-08	0.112473	0.0101627	-7.85724	0.094928	1.29476	1.2443	0.635329	0.000903531	7.8674	1.79574	4.38113	0.000288651	0.000703929
chr1_119739600_119740200	0.0960908	0.896422	4.41784e-06	0.189917	-0.187589	-7.21108	0.111788	1.43302	1.38571	NA	NA	NA	NA	NA	NA	NA
chr1_119768400_119769000	0.675845	0.0373553	0.00013511	0.0476273	-4.12094	-7.84741	0.113177	1.92214	1.88385	NA	NA	NA	NA	NA	NA	NA
chr1_119769000_119769600	0.333413	0.0379349	0.000158004	0.111717	-4.15085	-7.83655	0.114284	1.94225	1.9038	NA	NA	NA	NA	NA	NA	NA
chr1_11979600_11980200	0.867931	0.127608	0.00437372	0.0208914	-2.23313	-4.1462	0.124935	1.43924	1.38307	NA	NA	NA	NA	NA	NA	NA
chr1_11980800_11981400	0.0408045	0.0309939	0.0091113	-0.279407	-4.45585	-5.30698	0.132751	2.00225	1.94901	NA	NA	NA	NA	NA	NA	NA
chr1_119811600_119812200	0.0399129	0.032618	2.23154e-05	0.223367	-4.1585	-8.71913	0.105631	1.88739	1.84716	NA	NA	NA	NA	NA	NA	NA
chr1_1198200_1198800	0.137092	0.10242	5.60505e-05	0.171179	-2.79646	-7.26221	0.113131	1.67811	1.63586	NA	NA	NA	NA	NA	NA	NA
chr1_11982000_11982600	0.935715	0.035939	0.000609975	0.0100894	-4.39801	-7.1725	0.124408	2.03522	1.94903	NA	NA	NA	NA	NA	NA	NA
chr1_11983200_11983800	0.0680212	0.156472	0.0011224	0.223134	-2.38134	-5.59945	0.119398	1.65304	1.61098	NA	NA	NA	NA	NA	NA	NA
chr1_11983800_11984400	0.0481414	0.00520841	0.00525829	0.255387	-6.15739	-5.91891	0.125795	2.09887	2.02001	NA	NA	NA	NA	NA	NA	NA
chr1_119874000_119874600	0.738118	0.165181	0.959195	0.0484867	-1.95384	0.0693766	0.144145	1.38543	1.34859	0.128794	0.278115	-2.02322	1.93342	-1.04645	0.307837	0.0604662
chr1_119874600_119875200	0.940597	0.0536561	0.587363	0.0116334	-3.19443	-0.848242	0.155262	1.61302	1.55214	NA	NA	NA	NA	NA	NA	NA
chr1_119893200_119893800	0.102164	0.428853	0.00967843	0.252948	-1.58407	-5.22286	0.151673	1.98454	1.93466	NA	NA	NA	NA	NA	NA	NA
chr1_119893800_119894400	0.110234	0.111462	0.000720924	0.212419	-3.05722	-6.6565	0.130433	1.8839	1.83649	NA	NA	NA	NA	NA	NA	NA
chr1_119896200_119896800	0.708805	0.0143213	0.0115967	0.047149	-3.91358	-3.91185	0.125469	1.53734	1.48784	NA	NA	NA	NA	NA	NA	NA
chr1_119896800_119897400	0.806874	0.00157743	0.00438256	-0.0278732	-5.32776	-4.63649	0.113364	1.58593	1.547	NA	NA	NA	NA	NA	NA	NA
chr1_119920200_119920800	0.892095	0.0425948	0.0434844	0.019905	-4.66937	-4.55068	0.145924	2.23893	2.19178	NA	NA	NA	NA	NA	NA	NA
chr1_11992200_11992800	0.796663	0.0100791	0.000937643	-0.0299523	-4.84622	-6.21754	0.115572	1.80565	1.75806	NA	NA	NA	NA	NA	NA	NA
chr1_119981400_119982000	0.203595	0.00551913	0.0418884	0.165592	-5.04639	-3.53529	0.128395	1.73284	1.68908	NA	NA	NA	NA	NA	NA	NA
chr1_119982000_119982600	0.0185874	0.0293673	0.0140851	0.316177	-4.41552	-4.90874	0.129568	1.96365	1.92325	NA	NA	NA	NA	NA	NA	NA
chr1_11998800_11999400	0.85761	0.0731001	0.00033261	-0.0213242	-3.49195	-7.23665	0.118188	1.90383	1.86592	NA	NA	NA	NA	NA	NA	NA
chr1_12000600_12001200	0.478245	0.282168	0.00146763	0.10942	2.06151	-6.25163	0.153043	1.8944	1.84729	0.221155	0.00652868	8.31314	2.64598	3.1418	0.00513374	0.00367552
chr1_12001200_12001800	0.128826	0.0437346	9.67018e-06	-0.206217	3.14121	-7.30461	0.133341	1.51481	1.46934	0.038235	0.00142317	10.4458	2.11036	4.94979	7.71459e-05	0.00034472
chr1_12001800_12002400	0.539341	0.0132778	4.61235e-05	-0.0843815	3.86963	-6.56612	0.136445	1.5023	1.45937	0.0157496	0.00202128	10.4357	2.09444	4.9826	7.15359e-05	0.000339907
chr1_12005400_12006000	0.481228	0.0551561	0.00295407	0.0856836	-3.3625	-5.22798	0.120665	1.70892	1.66526	NA	NA	NA	NA	NA	NA	NA
chr1_12006000_12006600	0.353568	0.0784881	0.000149264	-0.105944	-3.29622	-7.42159	0.113048	1.83167	1.79516	NA	NA	NA	NA	NA	NA	NA
chr1_12011400_12012000	0.149563	0.00147129	0.0142439	-0.174355	-6.21372	-4.5667	0.118966	1.83655	1.79238	NA	NA	NA	NA	NA	NA	NA
chr1_120175800_120176400	0.401342	0.0431822	0.0263649	-0.0945045	-2.85851	-3.04248	0.111567	1.37469	1.32591	NA	NA	NA	NA	NA	NA	NA
chr1_120176400_120177000	0.598293	0.0312678	0.172163	-0.0598319	-2.97086	-1.79862	0.112777	1.33725	1.29689	NA	NA	NA	NA	NA	NA	NA
chr1_12018600_12019200	0.579443	0.0076091	0.0319392	-0.0757448	-5.25012	-4.05558	0.135705	1.88058	1.83309	NA	NA	NA	NA	NA	NA	NA
chr1_12019200_12019800	0.914554	0.243949	0.055106	0.01376	-1.68047	-2.70181	0.127539	1.42377	1.37284	NA	NA	NA	NA	NA	NA	NA
chr1_12019800_12020400	0.366139	0.927687	0.0367636	0.110477	0.114549	-2.60474	0.121039	1.25529	1.21096	0.618202	0.0144193	2.71929	1.74418	1.55907	0.134665	0.030813
chr1_12021600_12022200	0.662239	0.149111	0.00238261	-0.0541829	-2.18921	-4.63082	0.123237	1.49206	1.44009	NA	NA	NA	NA	NA	NA	NA
chr1_12022200_12022800	0.562042	0.924553	4.27137e-05	-0.0678938	-0.134272	-6.21299	0.116247	1.41011	1.3737	NA	NA	NA	NA	NA	NA	NA
chr1_1202400_1203000	0.408784	0.438223	0.000155615	0.103517	-1.3839	-7.10721	0.124173	1.7697	1.7246	NA	NA	NA	NA	NA	NA	NA
chr1_12028800_12029400	0.236288	0.168766	0.00699957	0.175372	-2.73223	-5.37949	0.146146	1.95415	1.90536	NA	NA	NA	NA	NA	NA	NA
chr1_12029400_12030000	0.224799	0.0437365	0.00607439	-0.162823	-3.42243	-4.58281	0.132333	1.65044	1.59317	NA	NA	NA	NA	NA	NA	NA
chr1_1203000_1203600	0.187892	0.431152	0.000402182	0.173355	-1.29785	-6.0803	0.129688	1.63414	1.59308	NA	NA	NA	NA	NA	NA	NA
chr1_12030000_12030600	0.154339	0.00138565	0.0130625	-0.170682	-5.04601	-3.68679	0.117857	1.4824	1.42772	NA	NA	NA	NA	NA	NA	NA
chr1_12030600_12031200	0.437779	0.000458284	0.00158824	0.090162	-7.39142	-6.2953	0.115185	1.95847	1.87526	NA	NA	NA	NA	NA	NA	NA
chr1_12034800_12035400	0.000390696	0.0447728	0.000176857	0.444128	-3.91118	-7.43145	0.116078	1.89579	1.82118	NA	NA	NA	NA	NA	NA	NA
chr1_12035400_12036000	0.0895914	0.144432	0.000494158	0.227403	-3.09904	-7.6694	0.131134	2.08726	2.04551	NA	NA	NA	NA	NA	NA	NA
chr1_12039000_12039600	0.0256586	0.253735	0.00379656	-0.302639	-2.28768	-5.91284	0.131231	1.97933	1.93909	NA	NA	NA	NA	NA	NA	NA
chr1_1204200_1204800	0.434724	0.079326	0.00520453	0.103375	-3.21878	-5.12992	0.131183	1.79383	1.74847	NA	NA	NA	NA	NA	NA	NA
chr1_12044400_12045000	0.481556	0.104731	0.00185497	0.0955275	-3.57008	-6.8555	0.134629	2.15715	2.07537	NA	NA	NA	NA	NA	NA	NA
chr1_12047400_12048000	0.858055	0.0175869	0.000211827	-0.0200695	-4.044	-6.44121	0.111586	1.64201	1.60101	NA	NA	NA	NA	NA	NA	NA
chr1_1204800_1205400	0.494859	0.88686	0.00026107	0.082927	-0.200769	-5.39675	0.12052	1.40329	1.36407	NA	NA	NA	NA	NA	NA	NA
chr1_12048000_12048600	0.620783	0.179585	0.000465104	0.0590835	-2.4408	-6.59365	0.118617	1.79105	1.74933	NA	NA	NA	NA	NA	NA	NA
chr1_12050400_12051000	0.846419	0.0467491	0.027402	-0.0307227	-4.74527	-5.06591	0.157726	2.32209	2.2236	NA	NA	NA	NA	NA	NA	NA
chr1_12052800_12053400	0.972794	0.000429326	0.000385189	0.0034984	-6.75818	-6.68641	0.102025	1.78062	1.74546	NA	NA	NA	NA	NA	NA	NA
chr1_12053400_12054000	0.880942	0.000109458	0.000220449	-0.0139167	-5.9254	-5.48371	0.0924022	1.40024	1.36734	NA	NA	NA	NA	NA	NA	NA
chr1_1205400_1206000	0.783016	0.4501	0.000131709	-0.0330691	1.00612	-5.29458	0.11938	1.32081	1.26858	0.353927	0.00283377	6.3007	1.83134	3.44048	0.0025879	0.00247376
chr1_12054000_12054600	0.70616	0.0121013	0.0643982	-0.0432659	-3.42823	-2.39561	0.114047	1.31225	1.26424	NA	NA	NA	NA	NA	NA	NA
chr1_1206000_1206600	0.410514	0.970379	0.000202697	0.101813	-0.0541094	-5.70527	0.122585	1.44928	1.41316	NA	NA	NA	NA	NA	NA	NA
chr1_12061200_12061800	0.00430911	0.302286	8.52749e-06	0.323361	-1.74149	-8.14122	0.10767	1.6693	1.62537	NA	NA	NA	NA	NA	NA	NA
chr1_12061800_12062400	0.0141431	0.217679	4.24517e-06	0.265038	-2.07018	-8.41159	0.103909	1.65637	1.61276	NA	NA	NA	NA	NA	NA	NA
chr1_12063000_12063600	0.685677	0.128521	0.0263059	-0.0527148	-2.33316	-3.37427	0.129426	1.5074	1.46989	NA	NA	NA	NA	NA	NA	NA
chr1_12063600_12064200	0.289526	0.0810806	0.00296174	-0.122495	-2.38264	-4.02528	0.11432	1.33584	1.28254	NA	NA	NA	NA	NA	NA	NA
chr1_12064200_12064800	0.646125	0.00789926	0.00110121	-0.0535798	-4.90154	-5.98973	0.115927	1.76471	1.72007	NA	NA	NA	NA	NA	NA	NA
chr1_1206600_1207200	0.796875	0.00558638	0.00143197	-0.0296336	-4.93166	-5.6098	0.114464	1.69606	1.65351	NA	NA	NA	NA	NA	NA	NA
chr1_12067800_12068400	0.545421	0.0572789	0.00202207	-0.0773165	-3.57177	-5.84166	0.126925	1.83163	1.78469	NA	NA	NA	NA	NA	NA	NA
chr1_12068400_12069000	0.288418	0.00708128	0.00279224	-0.127125	-5.09702	-5.56393	0.118365	1.80812	1.76102	NA	NA	NA	NA	NA	NA	NA
chr1_1207200_1207800	0.38629	0.000305928	0.00105775	-0.0904131	-6.89051	-6.00791	0.103367	1.76438	1.71856	NA	NA	NA	NA	NA	NA	NA
chr1_1207800_1208400	0.850027	0.262575	0.0019497	-0.0245321	-1.73704	-4.87589	0.129014	1.53148	1.48387	NA	NA	NA	NA	NA	NA	NA
chr1_12079200_12079800	0.558665	0.00640484	0.000196021	0.0666239	-5.5903	-7.58471	0.113091	1.95689	1.87374	NA	NA	NA	NA	NA	NA	NA
chr1_12081000_12081600	0.347292	0.0902635	0.0118078	-0.123935	-2.84969	-4.21263	0.130517	1.64685	1.60657	NA	NA	NA	NA	NA	NA	NA
chr1_12081600_12082200	0.591232	0.118671	0.0165765	0.0766492	-2.85991	-4.36315	0.141725	1.79863	1.75448	NA	NA	NA	NA	NA	NA	NA
chr1_1208400_1209000	0.382844	0.262099	0.0301633	-0.11302	-1.62736	-3.0849	0.128271	1.43333	1.37895	NA	NA	NA	NA	NA	NA	NA
chr1_12085200_12085800	0.402688	0.486526	0.00431424	0.118737	-1.21689	-5.08532	0.140579	1.7347	1.69351	NA	NA	NA	NA	NA	NA	NA
chr1_12085800_12086400	0.169759	0.365879	0.0023459	0.196199	-1.62918	-5.61023	0.14066	1.78396	1.7417	NA	NA	NA	NA	NA	NA	NA
chr1_12087000_12087600	0.517655	0.0730194	0.00540093	0.0883653	-3.5699	-5.53548	0.135533	1.94576	1.89556	NA	NA	NA	NA	NA	NA	NA
chr1_12087600_12088200	0.0827601	0.0310226	0.000290285	0.200811	-3.91719	-6.72151	0.113227	1.76052	1.71368	NA	NA	NA	NA	NA	NA	NA
chr1_120954600_120955200	0.360442	0.00101255	0.0944776	-0.11655	-5.27109	-2.48759	0.126172	1.50145	1.4569	NA	NA	NA	NA	NA	NA	NA
chr1_120955200_120955800	0.504074	0.00514656	0.260638	-0.0901432	-4.42117	-1.66303	0.133867	1.50478	1.4602	NA	NA	NA	NA	NA	NA	NA
chr1_1209600_1210200	0.333871	0.281898	0.0130108	-0.121155	-1.53978	-3.51496	0.124057	1.41416	1.36036	NA	NA	NA	NA	NA	NA	NA
chr1_12096600_12097200	0.365324	0.0804704	0.00231012	-0.12374	-3.94288	-6.84906	0.135338	2.20601	2.12274	NA	NA	NA	NA	NA	NA	NA
chr1_12097200_12097800	0.394923	0.111229	0.00428229	-0.122053	-3.72346	-6.63132	0.142127	2.29291	2.20637	NA	NA	NA	NA	NA	NA	NA
chr1_121011000_121011600	0.69473	0.128129	0.0107044	0.0481693	-2.72789	-4.59137	0.121974	1.76057	1.72574	NA	NA	NA	NA	NA	NA	NA
chr1_1210200_1210800	0.168672	0.374236	0.00724549	-0.151619	-1.13761	-3.43924	0.108417	1.26783	1.2238	NA	NA	NA	NA	NA	NA	NA
chr1_12107400_12108000	0.567378	0.0404655	0.00897693	-0.0745982	-4.16571	-5.28435	0.129496	1.97571	1.93663	NA	NA	NA	NA	NA	NA	NA
chr1_1210800_1211400	0.183163	0.00089454	0.0120465	-0.153113	-5.90398	-4.23393	0.113297	1.66196	1.61955	NA	NA	NA	NA	NA	NA	NA
chr1_12125400_12126000	0.849121	0.711105	0.000636643	0.0201422	0.441529	-4.20816	0.105283	1.18477	1.14793	0.525649	0.00509888	4.64969	1.64968	2.81855	0.0106124	0.00561658
chr1_12126000_12126600	0.735131	0.454643	0.00163027	-0.0404103	0.970524	-4.16747	0.118726	1.28703	1.24476	0.357453	0.00668922	5.13799	1.7905	2.86959	0.00947502	0.00524322
chr1_12127200_12127800	0.845195	0.157389	0.00113027	-0.0264109	-3.11534	-7.36482	0.134504	2.16745	2.12033	NA	NA	NA	NA	NA	NA	NA
chr1_12127800_12128400	0.742996	0.304246	7.80542e-05	0.0389536	-1.61573	-6.58357	0.118088	1.55512	1.51799	NA	NA	NA	NA	NA	NA	NA
chr1_1213800_1214400	0.665521	0.0394946	0.218075	-0.0580079	-3.09907	-1.75747	0.13332	1.46233	1.40739	NA	NA	NA	NA	NA	NA	NA
chr1_121401600_121402200	0.0324325	0.0738314	2.36789e-06	-0.364167	1.89639	5.47206	0.165097	1.03665	1.01569	0.0602812	0.00114117	-3.57567	1.4513	-2.46377	0.022937	0.00903501
chr1_12142200_12142800	0.4618	0.0504216	3.49912e-05	0.079639	-3.07511	-6.8327	0.107316	1.53064	1.49064	NA	NA	NA	NA	NA	NA	NA
chr1_12142800_12143400	0.380934	0.113051	0.763147	0.0760535	-1.30167	-0.239241	0.0859682	0.805764	0.789201	NA	NA	NA	NA	NA	NA	NA
chr1_12143400_12144000	0.245758	0.10356	0.577856	0.106216	-1.32105	0.436808	0.090342	0.795443	0.779316	0.0821089	0.158933	-1.75786	1.11358	-1.57856	0.130123	0.0299985
chr1_1214400_1215000	0.260575	0.000217445	0.00640446	-0.12473	-6.67559	-4.62886	0.109503	1.66272	1.62032	NA	NA	NA	NA	NA	NA	NA
chr1_12144000_12144600	0.0334754	0.00213968	0.889039	0.285503	-4.40896	0.183	0.130247	1.35517	1.30439	0.00585746	0.258075	-4.59196	1.88094	-2.44131	0.0240563	0.00933496
chr1_121518000_121518600	0.943201	0.005109	1.15925e-05	-0.00710607	-5.52182	-8.88658	0.0991954	1.87767	1.80724	NA	NA	NA	NA	NA	NA	NA
chr1_121518600_121519200	0.50087	0.658142	0.010223	-0.065114	-0.472419	-2.7675	0.0959713	1.06074	1.03326	NA	NA	NA	NA	NA	NA	NA
chr1_121519200_121519800	0.5813	0.408207	0.888837	-0.0690897	0.863498	0.142203	0.124392	1.03452	1.01174	0.321357	0.25804	0.721295	1.44701	0.498473	0.623588	0.112014
chr1_12153000_12153600	0.00179554	0.0119047	0.00309303	0.415499	-5.1656	-6.01259	0.125355	1.97242	1.92525	NA	NA	NA	NA	NA	NA	NA
chr1_121557600_121558200	0.0291669	0.0901472	0.0191404	0.300984	-3.37696	-4.62069	0.133677	1.95084	1.9029	NA	NA	NA	NA	NA	NA	NA
chr1_1215600_1216200	0.781524	0.0199003	0.023689	0.0360975	-3.76403	-3.55846	0.129399	1.5604	1.52085	NA	NA	NA	NA	NA	NA	NA
chr1_12161400_12162000	0.219999	0.230697	0.344982	0.198925	-2.05982	-1.56581	0.159978	1.69582	1.64101	NA	NA	NA	NA	NA	NA	NA
chr1_1216200_1216800	0.686689	0.00350549	0.393016	-0.0410925	-3.5123	-0.956423	0.101235	1.14106	1.10921	NA	NA	NA	NA	NA	NA	NA
chr1_12162000_12162600	0.577262	0.0949962	0.142398	0.0844572	-2.79952	-2.36675	0.150445	1.64225	1.58579	NA	NA	NA	NA	NA	NA	NA
chr1_12162600_12163200	0.708251	0.1761	0.015667	-0.053158	-2.26707	-4.03059	0.141177	1.64999	1.60604	NA	NA	NA	NA	NA	NA	NA
chr1_12163200_12163800	0.223698	0.11569	0.0132243	-0.166283	-2.49181	-3.86096	0.134819	1.55408	1.498	NA	NA	NA	NA	NA	NA	NA
chr1_12165000_12165600	0.975414	0.377546	0.0383258	-0.00378189	-1.20701	-2.79083	0.12205	1.35461	1.30866	NA	NA	NA	NA	NA	NA	NA
chr1_12165600_12166200	0.715118	0.0267096	0.012109	-0.043839	-3.22343	-3.53417	0.119372	1.40815	1.35293	NA	NA	NA	NA	NA	NA	NA
chr1_12167400_12168000	0.915875	0.0131996	0.263004	0.0158538	-4.32434	-1.83874	0.149264	1.67731	1.62262	NA	NA	NA	NA	NA	NA	NA
chr1_1216800_1217400	0.547032	0.00838496	0.375087	-0.0730318	-3.79679	-1.19438	0.120375	1.37826	1.3335	NA	NA	NA	NA	NA	NA	NA
chr1_12168000_12168600	0.849381	0.00491609	0.493738	-0.0283099	-5.19906	-1.18547	0.148235	1.75943	1.71839	NA	NA	NA	NA	NA	NA	NA
chr1_1217400_1218000	0.173771	0.0410717	0.00292307	-0.174504	-3.7846	-5.51657	0.126307	1.80062	1.75508	NA	NA	NA	NA	NA	NA	NA
chr1_121768200_121768800	0.119325	0.107224	0.110513	0.253988	-3.14314	-2.98163	0.160027	1.91318	1.83231	NA	NA	NA	NA	NA	NA	NA
chr1_1218000_1218600	0.725091	0.177767	0.0287398	-0.0435912	-2.00983	-3.20384	0.123202	1.46853	1.41895	NA	NA	NA	NA	NA	NA	NA
chr1_12180600_12181200	0.314276	0.138695	0.00356482	-0.134823	-2.46549	-4.82571	0.132515	1.63623	1.57085	NA	NA	NA	NA	NA	NA	NA
chr1_12181200_12181800	0.423437	0.453081	1.1542e-05	-0.090482	-1.12502	-7.10889	0.112029	1.48672	1.44534	NA	NA	NA	NA	NA	NA	NA
chr1_12184200_12184800	0.161908	0.0371461	0.0250109	-0.19269	-4.06317	-4.27377	0.135552	1.893	1.84457	NA	NA	NA	NA	NA	NA	NA
chr1_12184800_12185400	0.52655	0.0450828	0.00827119	-0.0737711	-2.83763	-3.65083	0.115604	1.37751	1.32277	NA	NA	NA	NA	NA	NA	NA
chr1_12185400_12186000	0.583273	0.0484691	0.000205207	-0.0611148	-2.98658	-5.78746	0.110613	1.47333	1.43491	NA	NA	NA	NA	NA	NA	NA
chr1_1218600_1219200	0.604861	0.757402	0.00762473	0.0612862	-0.427924	-3.72902	0.11763	1.37711	1.3361	NA	NA	NA	NA	NA	NA	NA
chr1_12186000_12186600	0.716598	0.175857	0.00250318	0.046787	-2.30841	-5.23721	0.128096	1.67911	1.63753	NA	NA	NA	NA	NA	NA	NA
chr1_12188400_12189000	0.763795	0.0166285	0.000238267	-0.0341689	-4.7799	-7.36609	0.113034	1.92305	1.84815	NA	NA	NA	NA	NA	NA	NA
chr1_1219200_1219800	0.347588	0.922514	0.827347	-0.0862748	-0.0755412	0.16595	0.0909131	0.77239	0.75655	0.616306	0.239698	-0.241491	1.08118	-0.223358	0.825522	0.14635
chr1_12197400_12198000	0.137445	0.0083098	0.000298875	-0.176087	-5.28562	-7.17978	0.116482	1.91632	1.83491	NA	NA	NA	NA	NA	NA	NA
chr1_1219800_1220400	0.100287	0.751133	0.209678	-0.179088	0.326916	-1.27412	0.106779	1.02465	1.00148	0.546107	0.0510572	1.60104	1.43279	1.11743	0.277054	0.0555459
chr1_1220400_1221000	0.502818	0.166475	5.01068e-05	-0.0749242	-2.14253	-6.65533	0.110937	1.52397	1.4876	NA	NA	NA	NA	NA	NA	NA
chr1_12206400_12207000	0.769419	0.257288	0.0124309	-0.0404745	-1.73536	-3.7859	0.137262	1.51288	1.45506	NA	NA	NA	NA	NA	NA	NA
chr1_12207000_12207600	0.058435	0.457344	0.00444344	-0.265327	-1.2128	-4.72781	0.136717	1.61805	1.58013	NA	NA	NA	NA	NA	NA	NA
chr1_12207600_12208200	0.220169	0.157861	0.00187088	-0.160303	-2.51459	-5.63561	0.128966	1.75151	1.70761	NA	NA	NA	NA	NA	NA	NA
chr1_12208200_12208800	0.602751	0.0623066	0.0039994	-0.0650181	-2.92893	-4.50655	0.124066	1.53304	1.48711	NA	NA	NA	NA	NA	NA	NA
chr1_1221600_1222200	0.120438	0.0814707	0.000761125	-0.190104	-3.15456	-6.22037	0.120147	1.77097	1.72477	NA	NA	NA	NA	NA	NA	NA
chr1_1222200_1222800	0.361829	0.0297465	2.80965e-05	-0.0931356	-3.15326	-6.3176	0.101119	1.40574	1.35848	NA	NA	NA	NA	NA	NA	NA
chr1_1222800_1223400	0.26173	0.124109	1.08234e-06	-0.0935385	-2.0561	-7.0943	0.0823213	1.31263	1.26311	NA	NA	NA	NA	NA	NA	NA
chr1_12229800_12230400	0.284048	0.398056	0.0041072	0.150199	-1.53601	-5.30305	0.138571	1.80063	1.75554	NA	NA	NA	NA	NA	NA	NA
chr1_12230400_12231000	0.827924	0.39792	0.00459629	0.0292921	-1.28483	-4.30944	0.133996	1.50574	1.44628	NA	NA	NA	NA	NA	NA	NA
chr1_12231000_12231600	0.512778	0.167042	0.0358403	0.0977861	-2.44647	-3.67727	0.148243	1.74254	1.70074	NA	NA	NA	NA	NA	NA	NA
chr1_1223400_1224000	0.533753	0.649947	3.79691e-05	-0.0576264	-0.642671	-6.22601	0.0919071	1.40683	1.36571	NA	NA	NA	NA	NA	NA	NA
chr1_1224000_1224600	0.763298	0.847601	0.000360092	-0.0368884	-0.309623	-5.94668	0.121767	1.60205	1.54354	NA	NA	NA	NA	NA	NA	NA
chr1_1224600_1225200	0.556735	0.194746	0.00216975	-0.0698506	-1.84368	-4.3738	0.117987	1.40115	1.34639	NA	NA	NA	NA	NA	NA	NA
chr1_1225200_1225800	0.283045	0.322804	2.42597e-05	-0.0723998	-0.963982	-4.43064	0.0666537	0.964513	0.943692	NA	NA	NA	NA	NA	NA	NA
chr1_1225800_1226400	0.358564	0.216683	0.000491896	-0.0635275	-1.11561	-3.27184	0.0685015	0.890644	0.872285	NA	NA	NA	NA	NA	NA	NA
chr1_1226400_1227000	0.966394	0.00280872	0.00885086	-0.00502642	-5.01104	-4.23782	0.118657	1.58707	1.55001	NA	NA	NA	NA	NA	NA	NA
chr1_1227000_1227600	0.546064	0.0817983	0.0229234	0.0864165	-3.52851	-4.54693	0.142092	1.9831	1.93196	NA	NA	NA	NA	NA	NA	NA
chr1_12273600_12274200	0.225412	0.018666	0.00508477	0.160657	-4.91511	-5.67926	0.130748	2.01561	1.93006	NA	NA	NA	NA	NA	NA	NA
chr1_12274200_12274800	0.727017	0.0764497	0.02724	0.0565729	-4.3412	-5.23129	0.16107	2.39526	2.29365	NA	NA	NA	NA	NA	NA	NA
chr1_1228200_1228800	0.568065	0.161552	0.0552789	-0.0762732	-2.11468	-2.81242	0.13264	1.48633	1.4301	NA	NA	NA	NA	NA	NA	NA
chr1_1228800_1229400	0.99742	0.0490756	0.000121645	0.000370884	-3.81244	-7.71939	0.114092	1.88602	1.83856	NA	NA	NA	NA	NA	NA	NA
chr1_12288000_12288600	0.0717626	0.00369037	0.0022736	0.218172	-5.9234	-6.10225	0.118373	1.93604	1.888	NA	NA	NA	NA	NA	NA	NA
chr1_1233000_1233600	0.0273261	0.344067	0.0488164	0.341242	-1.82	-3.75595	0.149705	1.90377	1.85586	NA	NA	NA	NA	NA	NA	NA
chr1_1233600_1234200	0.647232	0.825326	0.00529905	0.0563346	0.292895	-3.72026	0.122299	1.31957	1.27089	0.581	0.00867896	4.01316	1.83206	2.19052	0.0405028	0.0131512
chr1_1234200_1234800	0.835679	0.892175	0.00205695	-0.0237743	-0.174724	-4.0341	0.113969	1.28186	1.23472	NA	NA	NA	NA	NA	NA	NA
chr1_1234800_1235400	0.99485	0.0269112	0.000335669	-0.000715537	-3.44842	-5.70577	0.110254	1.50854	1.47232	NA	NA	NA	NA	NA	NA	NA
chr1_12348000_12348600	0.168314	0.304161	1.74906e-07	0.124958	-1.43386	-8.14454	0.0892757	1.37983	1.32526	NA	NA	NA	NA	NA	NA	NA
chr1_12348600_12349200	0.0847493	0.141497	2.72323e-06	0.134038	-1.9669	-6.79926	0.0760808	1.31483	1.27174	NA	NA	NA	NA	NA	NA	NA
chr1_12349200_12349800	0.16491	0.000379448	2.82322e-06	0.111052	-6.8555	-9.32249	0.0786931	1.78732	1.74714	NA	NA	NA	NA	NA	NA	NA
chr1_1235400_1236000	0.562717	0.0148406	0.0116544	0.0727038	-3.86148	-3.89986	0.124699	1.52542	1.48438	NA	NA	NA	NA	NA	NA	NA
chr1_1237200_1237800	0.398959	0.0304151	0.0219457	0.123738	-5.0726	-5.27835	0.145336	2.27109	2.22554	NA	NA	NA	NA	NA	NA	NA
chr1_1237800_1238400	0.652872	0.688401	0.00726647	0.0629589	0.648291	-4.37403	0.139066	1.6064	1.55703	0.513328	0.00920517	5.02232	2.23716	2.24495	0.036238	0.0122123
chr1_1238400_1239000	0.568408	0.750502	0.204045	0.0710127	0.374606	-1.4782	0.123602	1.17106	1.14731	0.545821	0.0496202	1.85281	1.63942	1.13016	0.27178	0.0546641
chr1_1239000_1239600	0.591549	0.975713	0.0300824	0.0667407	0.0410092	-2.92576	0.12351	1.33972	1.30714	0.632374	0.0133238	2.96677	1.87176	1.58502	0.128647	0.0297364
chr1_1239600_1240200	0.885837	0.952016	0.000751479	0.01965	0.0951004	-5.52296	0.136107	1.5718	1.52959	0.625779	0.00536009	5.61806	2.19321	2.56156	0.018608	0.00792807
chr1_12399600_12400200	0.166168	0.0793461	0.0169893	0.201857	-3.19261	-4.30457	0.143474	1.77936	1.73789	NA	NA	NA	NA	NA	NA	NA
chr1_12400200_12400800	0.351739	0.0679863	0.00682759	0.127276	-3.1417	-4.64639	0.13529	1.68089	1.64026	NA	NA	NA	NA	NA	NA	NA
chr1_1240200_1240800	0.80035	0.384599	0.00677137	0.0349694	-1.53923	-4.84851	0.137479	1.75346	1.70973	NA	NA	NA	NA	NA	NA	NA
chr1_1240800_1241400	0.329726	0.15058	0.0643892	0.144478	-2.42401	-3.05573	0.146663	1.65819	1.61255	NA	NA	NA	NA	NA	NA	NA
chr1_1241400_1242000	0.376856	0.132163	0.00119563	0.119301	-3.02916	-6.64923	0.133695	1.97617	1.9249	NA	NA	NA	NA	NA	NA	NA
chr1_1242000_1242600	0.144036	0.920699	0.00734101	0.20682	0.157168	-4.24314	0.139156	1.57009	1.51252	0.615771	0.00922043	4.40031	2.18012	2.01838	0.0571639	0.0166302
chr1_12433200_12433800	0.245566	0.00202283	0.00241063	-0.167144	-4.04016	3.86578	0.142105	1.23436	1.20372	0.00575621	0.00733793	-7.90594	1.72412	-4.58549	0.000179295	0.000542528
chr1_12433800_12434400	0.854962	7.44307e-05	0.159364	-0.0248846	-6.03563	1.91077	0.135374	1.38693	1.33585	0.00275483	0.0389684	-7.94641	1.92564	-4.12664	0.000523195	0.00100464
chr1_1244400_1245000	0.354431	0.212162	0.2114	-0.144952	-2.10098	-2.02933	0.154952	1.66056	1.60122	NA	NA	NA	NA	NA	NA	NA
chr1_12448200_12448800	0.878701	1.79966e-09	2.34831e-10	0.0209603	4.78356	5.09439	0.136579	0.640329	0.631484	0.00245825	0.000772152	-0.310831	0.899329	-0.345625	0.733233	0.130849
chr1_12448800_12449400	0.0868688	1.79971e-09	5.92841e-10	0.242117	4.68854	4.83006	0.138391	0.627609	0.619637	0.00245825	0.000772152	-0.141526	0.881954	-0.160468	0.874122	0.153949
chr1_12454200_12454800	0.00297574	0.148437	0.0424856	0.475859	-2.68089	-3.7176	0.1517	1.82406	1.78159	NA	NA	NA	NA	NA	NA	NA
chr1_1246800_1247400	0.13725	0.696111	0.458709	0.226571	-0.569974	-1.0573	0.149801	1.4502	1.41491	NA	NA	NA	NA	NA	NA	NA
chr1_12473400_12474000	0.814172	0.0476521	0.00569165	-0.0296796	-3.81335	-5.2917	0.125548	1.87403	1.82423	NA	NA	NA	NA	NA	NA	NA
chr1_1247400_1248000	0.379081	0.476862	0.223121	0.114733	-0.955799	-1.60542	0.129182	1.33264	1.29999	NA	NA	NA	NA	NA	NA	NA
chr1_12475200_12475800	0.00328381	0.00351029	0.00508726	0.383194	-6.03846	-5.52794	0.123548	1.96207	1.87875	NA	NA	NA	NA	NA	NA	NA
chr1_12475800_12476400	0.521292	0.00396447	0.0102528	0.0883508	-6.59922	-5.57679	0.136701	2.17538	2.083	NA	NA	NA	NA	NA	NA	NA
chr1_12477600_12478200	0.390409	0.0149307	0.171496	0.106046	-2.88256	1.54135	0.122305	1.13981	1.10962	0.0170364	0.0418271	-4.42391	1.59073	-2.78106	0.0115296	0.00592025
chr1_12478200_12478800	0.181119	0.0356997	0.14039	0.167031	-2.32454	1.57652	0.123007	1.07424	1.05086	0.0321846	0.0346979	-3.90106	1.50277	-2.59591	0.0172789	0.00756152
chr1_12478800_12479400	0.112813	0.000534853	0.0570989	0.199249	-5.67476	-2.87208	0.123256	1.52409	1.47172	NA	NA	NA	NA	NA	NA	NA
chr1_12479400_12480000	0.901614	0.0505287	0.000580038	0.0149999	-3.84701	-6.9357	0.120668	1.91579	1.87621	NA	NA	NA	NA	NA	NA	NA
chr1_12496200_12496800	0.506091	0.229355	0.0574372	0.103536	-2.60996	-4.06556	0.154489	2.14246	2.08623	NA	NA	NA	NA	NA	NA	NA
chr1_12496800_12497400	0.561838	0.126974	0.0480948	0.0828715	-2.54413	-3.24278	0.141818	1.63688	1.59693	NA	NA	NA	NA	NA	NA	NA
chr1_124989000_124989600	0.478723	0.110813	0.0145161	-0.1075	-3.60839	-5.39874	0.150522	2.21939	2.12526	NA	NA	NA	NA	NA	NA	NA
chr1_1250400_1251000	0.236536	0.0487348	0.00357114	-0.170248	-4.62773	-6.72231	0.141952	2.28575	2.18867	NA	NA	NA	NA	NA	NA	NA
chr1_12504000_12504600	0.490959	0.659041	0.000634292	-0.0872195	-0.80983	-6.50958	0.125615	1.82347	1.77513	NA	NA	NA	NA	NA	NA	NA
chr1_12504600_12505200	0.723683	0.953587	4.65858e-05	-0.0427878	-0.0974724	-7.29846	0.120288	1.66558	1.62324	NA	NA	NA	NA	NA	NA	NA
chr1_12505200_12505800	0.550397	0.306558	4.30797e-05	-0.069799	-1.8418	-7.84019	0.116023	1.7813	1.73448	NA	NA	NA	NA	NA	NA	NA
chr1_12505800_12506400	0.182608	0.0414172	0.000156278	-0.148071	-3.36899	-6.45082	0.109424	1.60574	1.56584	NA	NA	NA	NA	NA	NA	NA
chr1_125062800_125063400	0.129378	0.194825	0.0150846	-0.215344	-2.68212	-4.94927	0.139449	2.0387	1.9602	NA	NA	NA	NA	NA	NA	NA
chr1_1251000_1251600	0.191248	0.0427755	0.00305575	-0.186968	-4.753	-6.83085	0.140957	2.28111	2.18422	NA	NA	NA	NA	NA	NA	NA
chr1_12510000_12510600	0.391844	0.00718298	0.361927	0.1319	-5.40719	-1.72585	0.152589	1.92182	1.87417	NA	NA	NA	NA	NA	NA	NA
chr1_125118000_125118600	0.300307	0.120484	0.0132164	-0.157453	-3.73003	-5.8567	0.150303	2.35769	2.27212	NA	NA	NA	NA	NA	NA	NA
chr1_125167200_125167800	0.0127684	0.00102772	0.00011045	0.268628	-6.69338	-7.74869	0.103665	1.90931	1.83233	NA	NA	NA	NA	NA	NA	NA
chr1_125176200_125176800	0.159267	0.000661585	8.49213e-06	0.140766	-6.68112	-8.77329	0.0983884	1.82888	1.75113	NA	NA	NA	NA	NA	NA	NA
chr1_125176800_125177400	0.224556	0.00110453	1.74202e-05	0.113909	-6.26455	-8.43365	0.092529	1.79952	1.75885	NA	NA	NA	NA	NA	NA	NA
chr1_125177400_125178000	0.399164	0.000505796	8.19312e-06	0.073239	-6.2862	-8.21411	0.08606	1.68002	1.63603	NA	NA	NA	NA	NA	NA	NA
chr1_125178000_125178600	0.396479	0.0026835	3.1885e-07	0.0678456	-4.90781	-9.00135	0.0792666	1.54645	1.50731	NA	NA	NA	NA	NA	NA	NA
chr1_125178600_125179200	0.0103652	0.0664727	3.61838e-09	0.198691	-2.41312	-9.00925	0.0743309	1.2837	1.23969	NA	NA	NA	NA	NA	NA	NA
chr1_125179200_125179800	0.00144147	0.0300469	1.13771e-08	0.200261	-2.84108	-8.508	0.0590672	1.26902	1.22677	NA	NA	NA	NA	NA	NA	NA
chr1_125179800_125180400	0.00124092	0.00598332	8.12798e-07	0.179783	-2.71872	-5.26069	0.0522373	0.943284	0.922925	NA	NA	NA	NA	NA	NA	NA
chr1_125180400_125181000	0.00214665	0.00976977	1.6964e-06	0.19592	-2.87626	-5.70175	0.0602406	1.06687	1.03947	NA	NA	NA	NA	NA	NA	NA
chr1_125181000_125181600	0.0517956	0.00054197	4.18675e-07	0.145603	-4.75356	-7.23222	0.0729228	1.27817	1.2273	NA	NA	NA	NA	NA	NA	NA
chr1_125181600_125182200	0.0337692	0.00355534	2.39772e-06	0.136733	-3.45394	-5.87623	0.0624862	1.12396	1.09146	NA	NA	NA	NA	NA	NA	NA
chr1_125182200_125182800	0.0332882	0.000419714	0.00275471	0.150897	-3.96224	-3.21776	0.0687628	1.04193	1.01689	NA	NA	NA	NA	NA	NA	NA
chr1_125182800_125183400	0.00973804	0.00288349	0.000476889	0.203521	-3.70596	-4.30119	0.0754549	1.17722	1.14361	NA	NA	NA	NA	NA	NA	NA
chr1_125183400_125184000	0.00364143	0.0155843	3.16861e-06	0.220334	-3.09925	-6.32148	0.071902	1.23389	1.19231	NA	NA	NA	NA	NA	NA	NA
chr1_125184000_125184600	0.0204951	0.011502	5.631e-07	0.19988	-3.69859	-7.92256	0.083281	1.40501	1.36437	NA	NA	NA	NA	NA	NA	NA
chr1_12528600_12529200	0.208157	0.296454	0.0575902	-0.172096	-1.57001	-2.81093	0.13481	1.48667	1.44334	NA	NA	NA	NA	NA	NA	NA
chr1_1253400_1254000	0.715707	0.0284429	0.000425421	-0.0416473	-3.83641	-6.27645	0.11365	1.69578	1.6524	NA	NA	NA	NA	NA	NA	NA
chr1_1254000_1254600	0.443472	0.144057	0.0375502	-0.113673	-2.78763	-3.91715	0.147053	1.87573	1.82905	NA	NA	NA	NA	NA	NA	NA
chr1_12540600_12541200	0.194441	0.0926804	0.000310356	-0.160143	-3.42183	-7.61404	0.121619	1.99276	1.95196	NA	NA	NA	NA	NA	NA	NA
chr1_12541200_12541800	0.150771	0.320828	0.00123981	-0.168578	0.80964	2.72033	0.115373	0.80675	0.790344	0.251784	0.00620777	-1.91069	1.12938	-1.69181	0.106205	0.025685
chr1_12541800_12542400	0.667303	0.020366	0.0307025	-0.0600859	-2.92227	2.64333	0.138885	1.21626	1.18562	0.0211822	0.0134159	-5.5656	1.69852	-3.27674	0.00377236	0.00308414
chr1_1254600_1255200	0.244371	0.000694391	3.96363e-05	-0.111562	-6.50161	-7.95897	0.0946062	1.7876	1.75089	NA	NA	NA	NA	NA	NA	NA
chr1_12549000_12549600	0.30473	0.0075752	0.00904027	0.125731	-4.35475	-4.13748	0.121137	1.55891	1.51783	NA	NA	NA	NA	NA	NA	NA
chr1_12549600_12550200	0.884314	0.00235308	0.0298803	0.0148082	-4.53762	-3.04766	0.10121	1.40918	1.35984	NA	NA	NA	NA	NA	NA	NA
chr1_12550200_12550800	0.647966	0.000157886	0.00128737	0.0461216	-6.60619	-5.37002	0.100351	1.60481	1.56601	NA	NA	NA	NA	NA	NA	NA
chr1_1255200_1255800	0.405646	0.102714	0.000479075	-0.0812067	-2.14426	-4.67321	0.0967564	1.28786	1.24302	NA	NA	NA	NA	NA	NA	NA
chr1_1255800_1256400	0.987624	0.518722	0.0124192	-0.00211977	-0.988167	-3.80431	0.135917	1.51952	1.46193	NA	NA	NA	NA	NA	NA	NA
chr1_1256400_1257000	0.629281	0.00711464	9.92337e-05	-0.0496076	-4.48449	-6.6121	0.102075	1.59183	1.55129	NA	NA	NA	NA	NA	NA	NA
chr1_12564600_12565200	0.903182	0.131304	0.000556817	0.0152193	-3.08822	-7.26607	0.124427	2.01012	1.95844	NA	NA	NA	NA	NA	NA	NA
chr1_12565200_12565800	0.529612	0.170065	7.33955e-05	-0.0741596	-2.61934	-7.97796	0.117083	1.87924	1.83144	NA	NA	NA	NA	NA	NA	NA
chr1_1257000_1257600	0.375487	0.0282653	1.78265e-05	-0.0883262	-3.36144	-6.93036	0.0986971	1.48407	1.44743	NA	NA	NA	NA	NA	NA	NA
chr1_12570000_12570600	0.63555	0.0702682	3.60836e-05	0.0527583	-3.33796	-8.05205	0.110581	1.80116	1.76026	NA	NA	NA	NA	NA	NA	NA
chr1_12570600_12571200	0.173313	0.063888	6.7502e-05	-0.152501	-3.27874	-7.36626	0.110261	1.72685	1.68101	NA	NA	NA	NA	NA	NA	NA
chr1_12571200_12571800	0.117061	0.107101	0.0015213	-0.198317	-3.11412	-6.25497	0.124164	1.89484	1.85505	NA	NA	NA	NA	NA	NA	NA
chr1_12572400_12573000	0.552843	0.117474	0.00375029	-0.0757732	-3.1683	-5.90472	0.126734	1.98592	1.93361	NA	NA	NA	NA	NA	NA	NA
chr1_12573000_12573600	0.732894	0.0443005	0.00386596	0.0418073	-3.64844	-5.22839	0.12176	1.76434	1.71833	NA	NA	NA	NA	NA	NA	NA
chr1_1257600_1258200	0.251245	0.0639189	0.000152862	-0.128907	-3.33818	-7.08819	0.11094	1.75837	1.71764	NA	NA	NA	NA	NA	NA	NA
chr1_12580800_12581400	0.272703	0.0313687	0.00580603	0.14336	-4.42654	-5.62372	0.129136	1.99373	1.94365	NA	NA	NA	NA	NA	NA	NA
chr1_12581400_12582000	0.839014	0.0269547	0.00202318	-0.0245718	-4.18985	-5.84307	0.120268	1.83343	1.78523	NA	NA	NA	NA	NA	NA	NA
chr1_12582000_12582600	0.0585402	0.0417707	0.00158982	0.261324	-4.5481	-6.98	0.134713	2.17167	2.07943	NA	NA	NA	NA	NA	NA	NA
chr1_12585600_12586200	0.420414	0.233211	0.00203065	0.109572	-2.50593	-6.65034	0.134778	2.07441	2.03267	NA	NA	NA	NA	NA	NA	NA
chr1_12588000_12588600	0.63796	0.29421	0.00158791	0.068792	-2.41363	-7.47002	0.145225	2.27478	2.22514	NA	NA	NA	NA	NA	NA	NA
chr1_12591000_12591600	0.13455	0.19767	0.0225043	-0.214973	-2.50196	-4.40372	0.141131	1.91411	1.865	NA	NA	NA	NA	NA	NA	NA
chr1_12609000_12609600	0.945754	0.360106	0.00234485	0.00851384	-1.73861	-5.90799	0.124449	1.88082	1.83406	NA	NA	NA	NA	NA	NA	NA
chr1_12616800_12617400	0.722259	0.0596023	0.00110411	-0.044283	-3.89908	-6.86094	0.123825	2.01875	1.97076	NA	NA	NA	NA	NA	NA	NA
chr1_12617400_12618000	0.505405	8.47425e-05	0.0494256	0.0780467	-6.52783	-2.97787	0.116267	1.51405	1.47553	NA	NA	NA	NA	NA	NA	NA
chr1_12618000_12618600	0.317046	0.0581436	0.0414982	0.130303	-2.98354	-3.09801	0.128816	1.5355	1.4772	NA	NA	NA	NA	NA	NA	NA
chr1_12618600_12619200	0.0252766	0.0243697	0.0367014	0.307819	-3.65882	-3.24967	0.133112	1.57174	1.51027	NA	NA	NA	NA	NA	NA	NA
chr1_12619200_12619800	0.429933	0.0333725	0.0732221	0.0974254	-3.17081	-2.55452	0.122344	1.44564	1.39336	NA	NA	NA	NA	NA	NA	NA
chr1_12619800_12620400	0.748887	0.0133167	0.0974737	-0.0417401	-3.90449	-2.46383	0.129615	1.51652	1.45646	NA	NA	NA	NA	NA	NA	NA
chr1_1262400_1263000	0.777962	0.389774	0.000113307	-0.0337739	-1.34675	-6.39439	0.119075	1.55114	1.51494	NA	NA	NA	NA	NA	NA	NA
chr1_1263000_1263600	0.544311	0.181278	0.0036753	0.0813859	-2.29315	-5.04882	0.133236	1.68938	1.64939	NA	NA	NA	NA	NA	NA	NA
chr1_12636600_12637200	0.676272	0.20055	0.000329733	-0.05217	-2.50051	-7.30435	0.124146	1.92553	1.88201	NA	NA	NA	NA	NA	NA	NA
chr1_12643800_12644400	0.699652	0.191188	0.000913486	-0.0487025	-2.17865	-5.68474	0.125455	1.64228	1.60343	NA	NA	NA	NA	NA	NA	NA
chr1_12644400_12645000	0.601882	0.125623	0.00721175	-0.0709689	-2.9972	-5.26351	0.135096	1.92134	1.87176	NA	NA	NA	NA	NA	NA	NA
chr1_12658200_12658800	0.559419	0.0392397	0.00105129	0.0684487	-3.54731	-5.69818	0.116413	1.67156	1.62899	NA	NA	NA	NA	NA	NA	NA
chr1_12658800_12659400	0.211084	0.0169386	0.000834208	0.146284	-4.28938	-6.03214	0.115342	1.73091	1.68692	NA	NA	NA	NA	NA	NA	NA
chr1_12666000_12666600	0.629867	0.449629	0.000669788	0.0590437	-1.09511	-5.03159	0.1217	1.43613	1.37888	NA	NA	NA	NA	NA	NA	NA
chr1_12666600_12667200	0.268891	0.172527	0.000269563	0.136526	-2.3478	-6.51984	0.121992	1.69434	1.65223	NA	NA	NA	NA	NA	NA	NA
chr1_1267200_1267800	0.325182	0.0020096	0.0366081	-0.122275	-5.20903	-3.34396	0.122951	1.59037	1.55328	NA	NA	NA	NA	NA	NA	NA
chr1_1267800_1268400	0.318032	0.0173161	0.114414	-0.121411	-3.49695	-2.1974	0.120273	1.41626	1.36553	NA	NA	NA	NA	NA	NA	NA
chr1_1268400_1269000	0.328311	0.000623074	0.0259421	-0.119588	-5.96352	-3.64658	0.121038	1.62361	1.58444	NA	NA	NA	NA	NA	NA	NA
chr1_1270200_1270800	0.290681	0.0729238	0.130675	-0.178027	-4.22359	-3.45005	0.166548	2.30126	2.24188	NA	NA	NA	NA	NA	NA	NA
chr1_1270800_1271400	0.110767	0.140734	0.060907	-0.238833	-2.48231	-3.07726	0.146878	1.65611	1.60169	NA	NA	NA	NA	NA	NA	NA
chr1_12715200_12715800	0.747909	0.0532373	0.000195271	-0.0376931	-3.76907	-7.52223	0.116577	1.89971	1.85774	NA	NA	NA	NA	NA	NA	NA
chr1_12715800_12716400	0.563921	0.192165	0.000167931	-0.0701549	-2.4676	-7.43696	0.120701	1.86427	1.81523	NA	NA	NA	NA	NA	NA	NA
chr1_12716400_12717000	0.257572	0.048668	0.00517642	0.150192	-3.84225	-5.42579	0.131017	1.8972	1.84806	NA	NA	NA	NA	NA	NA	NA
chr1_12717000_12717600	0.253817	0.0736184	0.0152461	0.165911	-3.98545	-5.36215	0.143574	2.17695	2.12733	NA	NA	NA	NA	NA	NA	NA
chr1_1272000_1272600	0.859989	0.025412	3.39342e-05	0.018518	-3.97216	-7.69741	0.104397	1.71938	1.67587	NA	NA	NA	NA	NA	NA	NA
chr1_1272600_1273200	0.233146	0.00459287	0.00981521	-0.143069	-4.40114	-3.84376	0.118416	1.47692	1.42668	NA	NA	NA	NA	NA	NA	NA
chr1_1273200_1273800	1.75088e-05	5.98214e-05	0.198956	-0.574889	-7.57764	-2.17683	0.119932	1.71466	1.67025	NA	NA	NA	NA	NA	NA	NA
chr1_1274400_1275000	0.0738666	0.535672	9.36344e-05	0.222211	-1.12481	-7.51252	0.121486	1.80241	1.75508	NA	NA	NA	NA	NA	NA	NA
chr1_12744600_12745200	0.0741113	1.22225e-13	2.32033e-13	0.266619	5.93535	5.7636	0.145892	0.571812	0.566383	0.00245825	0.000772152	0.171743	0.804835	0.213389	0.833184	0.147586
chr1_12745200_12745800	0.0545825	6.33564e-25	1.8281e-25	0.222586	6.18952	6.40215	0.112846	0.299455	0.300656	0.00245825	0.000759841	-0.212623	0.424344	-0.501064	0.621796	0.111712
chr1_12745800_12746400	0.0833678	2.19313e-19	8.83393e-21	0.172713	4.77781	5.18484	0.0975831	0.317609	0.317354	0.00245825	0.000772152	-0.407026	0.448987	-0.906544	0.375441	0.0715859
chr1_1275000_1275600	0.398224	0.26092	5.69694e-05	0.100841	-2.11737	-8.03023	0.118257	1.86025	1.8109	NA	NA	NA	NA	NA	NA	NA
chr1_12755400_12756000	0.481793	0.113875	0.00119624	0.09666	-3.49398	-7.33142	0.136299	2.16794	2.1225	NA	NA	NA	NA	NA	NA	NA
chr1_1281000_1281600	0.783771	0.0219314	0.000812342	0.0324401	-4.16772	-6.14007	0.11753	1.75706	1.71284	NA	NA	NA	NA	NA	NA	NA
chr1_1281600_1282200	0.47091	0.0037954	0.00161958	0.081957	-5.21153	-5.58124	0.112734	1.70903	1.6659	NA	NA	NA	NA	NA	NA	NA
chr1_1282800_1283400	0.436918	0.027952	0.01835	0.110327	-5.03744	-5.20421	0.140681	2.21936	2.12807	NA	NA	NA	NA	NA	NA	NA
chr1_1284600_1285200	0.0377688	0.438342	0.00360101	-0.282611	-1.51511	-5.80155	0.132118	1.938	1.89074	NA	NA	NA	NA	NA	NA	NA
chr1_1285200_1285800	0.936151	0.611834	0.000718685	0.0102671	-0.810011	-5.61263	0.127466	1.58533	1.54805	NA	NA	NA	NA	NA	NA	NA
chr1_1285800_1286400	0.566256	0.472754	0.0119338	0.0818135	-1.14662	-3.98561	0.14161	1.58381	1.52241	NA	NA	NA	NA	NA	NA	NA
chr1_1286400_1287000	0.228826	0.106847	0.00735339	0.159423	-2.54486	-4.17297	0.130716	1.54731	1.48784	NA	NA	NA	NA	NA	NA	NA
chr1_1287000_1287600	0.167844	0.0409805	0.000973517	0.172464	-3.72846	-6.09433	0.123078	1.77308	1.72941	NA	NA	NA	NA	NA	NA	NA
chr1_1287600_1288200	0.806605	0.121056	0.00579722	0.0340921	-2.92725	-5.22971	0.138461	1.85319	1.80712	NA	NA	NA	NA	NA	NA	NA
chr1_1290000_1290600	0.0534057	0.861399	9.49286e-05	-0.239356	-0.283921	-6.74117	0.120731	1.6171	1.57645	NA	NA	NA	NA	NA	NA	NA
chr1_1290600_1291200	0.0745759	0.939334	7.1281e-05	-0.222938	-0.124001	-6.89672	0.122193	1.62042	1.57994	NA	NA	NA	NA	NA	NA	NA
chr1_1291800_1292400	0.439305	0.441595	6.54745e-05	-0.089123	-1.09926	-5.9908	0.11424	1.41618	1.3642	NA	NA	NA	NA	NA	NA	NA
chr1_1292400_1293000	0.953726	0.0189362	0.00668605	-0.00739979	-3.90204	-4.42231	0.126826	1.60404	1.55682	NA	NA	NA	NA	NA	NA	NA
chr1_1294200_1294800	0.501527	0.0806342	0.702968	0.093899	-2.55661	-0.52984	0.138611	1.4312	1.38087	NA	NA	NA	NA	NA	NA	NA
chr1_1294800_1295400	0.906933	0.00933752	0.00821966	-0.0147594	-4.54676	-4.51749	0.125555	1.67563	1.63536	NA	NA	NA	NA	NA	NA	NA
chr1_1295400_1296000	0.705117	0.10431	0.0285195	-0.0554948	-2.88479	-3.83731	0.145739	1.7409	1.69704	NA	NA	NA	NA	NA	NA	NA
chr1_1296000_1296600	0.0837956	0.491173	0.0312084	0.275537	-1.19339	-3.68349	0.155901	1.7196	1.6574	NA	NA	NA	NA	NA	NA	NA
chr1_1297800_1298400	0.427204	0.123767	0.00298374	-0.105171	-2.66395	-5.19937	0.131287	1.6991	1.65803	NA	NA	NA	NA	NA	NA	NA
chr1_1298400_1299000	0.612143	0.028872	0.000652557	-0.0597874	-3.88568	-6.14124	0.117116	1.72243	1.679	NA	NA	NA	NA	NA	NA	NA
chr1_1299000_1299600	0.460717	0.139941	6.62599e-05	0.0874348	-2.94048	-8.38232	0.117535	1.95777	1.91038	NA	NA	NA	NA	NA	NA	NA
chr1_1299600_1300200	0.90418	0.0896902	2.96001e-05	0.0134923	-3.18557	-8.30077	0.111463	1.83757	1.79102	NA	NA	NA	NA	NA	NA	NA
chr1_1300200_1300800	0.616466	0.174315	0.000207601	-0.0598597	-2.58345	-7.39186	0.118701	1.87233	1.83437	NA	NA	NA	NA	NA	NA	NA
chr1_1302000_1302600	0.201281	0.51397	0.00486335	0.13315	-0.807874	-3.53294	0.102702	1.22822	1.19399	NA	NA	NA	NA	NA	NA	NA
chr1_1302600_1303200	0.821683	0.6163	0.00247898	0.0177572	-0.458115	-2.84829	0.0783387	0.908012	0.889628	NA	NA	NA	NA	NA	NA	NA
chr1_1303200_1303800	0.840687	0.622241	0.000850065	0.0172394	-0.535806	-3.76894	0.0852786	1.08021	1.05587	NA	NA	NA	NA	NA	NA	NA
chr1_1303800_1304400	0.647861	0.0988126	0.201183	0.0686549	-2.69733	-1.99724	0.149331	1.60105	1.54019	NA	NA	NA	NA	NA	NA	NA
chr1_1304400_1305000	0.896167	0.77881	0.0394057	-0.0165331	0.364228	-2.64215	0.125987	1.2892	1.24614	0.559679	0.0148318	3.00638	1.79301	1.67672	0.10916	0.0262314
chr1_1305000_1305600	0.989675	0.864913	0.00797518	0.00163119	-0.230161	-3.59604	0.125362	1.34536	1.29639	NA	NA	NA	NA	NA	NA	NA
chr1_1305600_1306200	0.968504	0.447652	0.00619908	0.00531726	-1.13335	-4.08139	0.133938	1.47977	1.42261	NA	NA	NA	NA	NA	NA	NA
chr1_1306200_1306800	0.794675	0.105068	0.0178513	0.0337041	-2.44978	-3.49734	0.12876	1.48171	1.42356	NA	NA	NA	NA	NA	NA	NA
chr1_1306800_1307400	0.515786	0.0378461	0.000481378	-0.07645	-3.5983	-6.16897	0.116734	1.68289	1.64157	NA	NA	NA	NA	NA	NA	NA
chr1_1309800_1310400	0.898092	0.357806	0.0109173	-0.0188256	-1.56287	-4.2855	0.146182	1.68256	1.61544	NA	NA	NA	NA	NA	NA	NA
chr1_1311000_1311600	0.8231	0.232244	0.00134521	-0.029412	-2.08497	-5.73626	0.130814	1.72231	1.68017	NA	NA	NA	NA	NA	NA	NA
chr1_1311600_1312200	0.664378	0.0744475	0.00266305	0.0559782	-3.34105	-5.6658	0.128187	1.83039	1.78376	NA	NA	NA	NA	NA	NA	NA
chr1_1312200_1312800	0.698129	0.0529494	0.00875103	-0.0518419	-3.29467	-4.38378	0.132832	1.65851	1.60085	NA	NA	NA	NA	NA	NA	NA
chr1_1312800_1313400	0.446875	0.976128	0.0037114	-0.0712812	0.0314535	-3.11934	0.0929096	1.04543	1.02023	0.63247	0.00808961	3.15079	1.46075	2.15697	0.0433548	0.0137693
chr1_1313400_1314000	0.201686	0.751976	8.34268e-05	-0.116379	-0.370877	-4.89365	0.0898485	1.16653	1.13374	NA	NA	NA	NA	NA	NA	NA
chr1_1314000_1314600	0.0923168	0.785653	5.04029e-05	-0.178528	-0.34634	-5.44964	0.103849	1.26608	1.2186	NA	NA	NA	NA	NA	NA	NA
chr1_1314600_1315200	0.392263	0.464498	0.000995248	-0.120297	-1.50707	-6.99742	0.13929	2.04319	1.98989	NA	NA	NA	NA	NA	NA	NA
chr1_1315200_1315800	0.5859	0.40387	0.00372941	-0.083482	-1.95021	-6.91237	0.15216	2.31481	2.26209	NA	NA	NA	NA	NA	NA	NA
chr1_1317600_1318200	0.0520465	0.0108847	0.000554844	0.237391	-5.15366	-6.90065	0.119026	1.94184	1.85936	NA	NA	NA	NA	NA	NA	NA
chr1_1318800_1319400	0.531435	0.0961491	1.3606e-05	-0.0651708	-2.75385	-7.68961	0.103351	1.62126	1.57922	NA	NA	NA	NA	NA	NA	NA
chr1_1319400_1320000	0.311081	0.648482	0.0362542	-0.0942821	-0.447686	-2.05889	0.0920516	0.975609	0.954467	NA	NA	NA	NA	NA	NA	NA
chr1_1320000_1320600	0.630468	0.344396	0.0344824	-0.0458696	-1.0099	-2.25009	0.0947125	1.05711	1.03258	NA	NA	NA	NA	NA	NA	NA
chr1_1323600_1324200	0.158802	0.116143	0.0279914	0.210391	-3.47337	-4.81166	0.146885	2.16903	2.12045	NA	NA	NA	NA	NA	NA	NA
chr1_1324800_1325400	0.388655	0.148261	0.00960655	0.107491	-2.12313	-3.75902	0.123511	1.44392	1.39094	NA	NA	NA	NA	NA	NA	NA
chr1_1325400_1326000	0.376737	0.562036	0.00603904	0.0836431	-0.639998	-3.08001	0.0937115	1.09578	1.06992	NA	NA	NA	NA	NA	NA	NA
chr1_1326000_1326600	0.402721	0.900346	0.00213385	0.0835568	-0.147046	-3.70091	0.0989342	1.1678	1.13721	NA	NA	NA	NA	NA	NA	NA
chr1_1326600_1327200	0.287268	0.254919	0.000520628	0.13186	-1.83074	-5.78328	0.122477	1.58799	1.54954	NA	NA	NA	NA	NA	NA	NA
chr1_1327200_1327800	0.884824	0.135192	0.0415442	-0.0218482	-2.60925	-3.45691	0.149992	1.71589	1.64872	NA	NA	NA	NA	NA	NA	NA
chr1_1327800_1328400	0.72846	0.206565	0.0123261	0.0487781	-2.12433	-4.15543	0.139647	1.65816	1.59504	NA	NA	NA	NA	NA	NA	NA
chr1_1329600_1330200	0.80058	9.00816e-05	0.0024334	-0.0233212	-6.37085	-4.58413	0.0917937	1.48418	1.42888	NA	NA	NA	NA	NA	NA	NA
chr1_1330200_1330800	0.978967	0.0124474	0.133824	-0.00281709	-3.41009	-1.94682	0.106276	1.31089	1.27566	NA	NA	NA	NA	NA	NA	NA
chr1_1330800_1331400	0.614947	0.766745	0.946958	0.0686165	-0.36441	0.079653	0.135481	1.22123	1.19079	0.553923	0.274877	-0.444063	1.70569	-0.260341	0.797262	0.141684
chr1_1331400_1332000	0.941575	0.045916	0.0382656	-0.00963709	-3.04583	-3.0408	0.130777	1.48455	1.4254	NA	NA	NA	NA	NA	NA	NA
chr1_1332000_1332600	0.913441	0.168624	0.00544035	-0.0153594	-2.43242	-4.95323	0.140527	1.73913	1.69774	NA	NA	NA	NA	NA	NA	NA
chr1_1333200_1333800	0.822574	0.205768	0.322276	-0.033135	-2.02249	-1.52826	0.146928	1.57585	1.52741	NA	NA	NA	NA	NA	NA	NA
chr1_1333800_1334400	0.343539	0.187899	0.00190445	-0.117771	-1.93336	-4.58335	0.123055	1.44639	1.39138	NA	NA	NA	NA	NA	NA	NA
chr1_1334400_1335000	0.421172	0.0172515	0.0185855	0.0908513	-3.44845	-3.28405	0.111934	1.39575	1.34576	NA	NA	NA	NA	NA	NA	NA
chr1_1335000_1335600	0.537793	0.0241464	0.000163593	0.0642363	-3.35959	-5.67826	0.103473	1.4408	1.38316	NA	NA	NA	NA	NA	NA	NA
chr1_1335600_1336200	0.957065	0.0105843	0.000830294	-0.00622824	-4.80564	-6.28224	0.115058	1.8033	1.75608	NA	NA	NA	NA	NA	NA	NA
[truncated: 214,092+ more rows]
