# Supplementary material for: DNA methylation-environment interactions in the human genome
Source: bioRxiv preprint, doi:10.1101/2023.05.19.541437, version 2 (2023-12-15)
Supplement: Supplementary File 7 [file 541437_file08.xlsx]

## Sheet: sheet1
Genomic_window	methylation_p	RNA_in_methylation_p	RNA_in_unmethylation_p	methylation_beta	RNA_in_methylation_beta	RNA_in_unmethylation_beta	methylation_se	RNA_in_methylation_se	RNA_in_unmethylation_se	RNA_in_methylation_FDR	RNA_in_unmethylation_FDR	RNAxmethylation_beta	RNAxmethylation_se	RNAxmethylation_t	RNAxmethylation_p	RNAxmethylation_FDR
chr1_1000200_1000800	0.280237	0.000304154	0.343883	0.228861	-4.09948	-0.89595	0.211048	1.10379	0.943043	NA	NA	NA	NA	NA	NA	NA
chr1_100037400_100038000	0.68373	0.00956934	0.728642	0.108013	-3.04671	0.344689	0.264534	1.15806	0.991348	0.0160634	0.508134	-3.3914	1.52443	-2.22471	0.0377738	0.00385856
chr1_100038000_100038600	0.859758	0.00219908	0.416114	0.0350401	-2.85001	0.635513	0.197921	0.911831	0.778963	0.00935433	0.343574	-3.48552	1.19926	-2.9064	0.00872841	0.00127876
chr1_100038600_100039200	0.0683597	0.00576363	0.334016	-0.321853	-2.58433	-0.758725	0.175087	0.920185	0.782398	NA	NA	NA	NA	NA	NA	NA
chr1_100047000_100047600	0.272098	0.751886	0.601895	0.375518	-0.446727	-0.630063	0.340443	1.40995	1.20474	NA	NA	NA	NA	NA	NA	NA
chr1_1000800_1001400	0.925736	4.95879e-05	0.485309	0.0173007	-3.88651	0.549049	0.18524	0.925091	0.784542	0.00323902	0.384661	-4.43556	1.21297	-3.65677	0.00156723	0.000376869
chr1_100132200_100132800	0.834295	0.153134	0.00408568	-0.0455632	-1.60598	-2.79175	0.217355	1.11748	0.954589	NA	NA	NA	NA	NA	NA	NA
chr1_100132800_100133400	0.806268	0.0246629	0.169078	-0.042358	-2.0561	-1.06553	0.172359	0.90431	0.770428	NA	NA	NA	NA	NA	NA	NA
chr1_1001400_1002000	0.43954	0.00295511	0.0190129	0.183861	-4.60222	-2.98356	0.237116	1.51844	1.25591	NA	NA	NA	NA	NA	NA	NA
chr1_100180800_100181400	0.636088	0.0897696	0.384497	0.13869	-2.48193	-1.08076	0.2924	1.45171	1.23848	NA	NA	NA	NA	NA	NA	NA
chr1_100199400_100200000	0.791167	0.498654	0.0381339	0.0717921	-0.887661	-2.34314	0.270553	1.30817	1.11832	NA	NA	NA	NA	NA	NA	NA
chr1_100213200_100213800	0.619285	0.000714705	0.0548478	-0.105843	-4.3796	-2.08915	0.212501	1.26265	1.07803	NA	NA	NA	NA	NA	NA	NA
chr1_100213800_100214400	0.394967	0.0217093	0.0726627	0.212435	-3.19849	-2.12132	0.248888	1.37626	1.17202	NA	NA	NA	NA	NA	NA	NA
chr1_10021800_10022400	0.141621	0.206689	0.312556	0.420133	-1.682	-1.14892	0.284071	1.32525	1.13317	NA	NA	NA	NA	NA	NA	NA
chr1_10023000_10023600	0.852534	0.477684	0.111515	0.0565772	-1.03725	-1.96611	0.303746	1.45653	1.22686	NA	NA	NA	NA	NA	NA	NA
chr1_100249200_100249800	0.467664	0.0027287	0.00784889	0.163357	-4.37083	-3.25557	0.224246	1.42995	1.20518	NA	NA	NA	NA	NA	NA	NA
chr1_100249800_100250400	0.522494	0.0518568	0.0458257	0.164702	-2.73971	-2.40066	0.256833	1.39584	1.19035	NA	NA	NA	NA	NA	NA	NA
chr1_1002600_1003200	0.171105	0.212596	0.0201192	-0.332835	-1.48933	-2.39539	0.241809	1.18885	1.0177	NA	NA	NA	NA	NA	NA	NA
chr1_100266000_100266600	0.464721	0.000767482	0.461939	-0.133779	-3.4092	-0.616927	0.182433	0.988871	0.836066	NA	NA	NA	NA	NA	NA	NA
chr1_100266600_100267200	0.719085	0.369053	0.0667042	0.0873157	-0.975446	-1.70636	0.242219	1.08208	0.922592	NA	NA	NA	NA	NA	NA	NA
chr1_10028400_10029000	0.0160168	0.0166942	0.00351815	0.523416	-3.07045	-3.21488	0.214414	1.26594	1.081	NA	NA	NA	NA	NA	NA	NA
chr1_10029000_10029600	0.889092	0.0277727	0.00923433	0.0345538	-3.24927	-3.26246	0.247283	1.45966	1.23408	NA	NA	NA	NA	NA	NA	NA
chr1_1003200_1003800	0.911794	0.0532551	0.00377766	0.0206637	-2.01448	-2.58582	0.186165	1.03253	0.876391	NA	NA	NA	NA	NA	NA	NA
chr1_10032000_10032600	0.438065	0.0041355	0.0193036	-0.170305	-3.71906	-2.57652	0.218925	1.27342	1.08725	NA	NA	NA	NA	NA	NA	NA
chr1_100320000_100320600	0.0912942	0.0412649	0.0986351	-0.459087	-3.02414	-2.08083	0.269814	1.46675	1.25072	NA	NA	NA	NA	NA	NA	NA
chr1_100321800_100322400	0.329108	0.351516	0.00527037	0.270514	-1.44101	-3.61632	0.276127	1.54104	1.2738	NA	NA	NA	NA	NA	NA	NA
chr1_10032600_10033200	0.847889	0.00890025	0.295523	0.0361621	-2.14409	0.731409	0.188145	0.807021	0.69631	0.0156038	0.265359	-2.87549	1.06589	-2.69773	0.0138466	0.00179826
chr1_10033200_10033800	0.469886	0.00627383	0.0638496	0.171441	-3.61894	-2.07848	0.236525	1.30208	1.11177	NA	NA	NA	NA	NA	NA	NA
chr1_100334400_100335000	0.668106	0.180787	0.300118	0.123399	-1.85155	-1.22184	0.287144	1.37588	1.17437	NA	NA	NA	NA	NA	NA	NA
chr1_100352400_100353000	0.279489	0.000718433	0.489827	-0.179327	-2.68881	0.463778	0.165111	0.775532	0.669624	0.00656178	0.387299	-3.15258	1.02462	-3.07683	0.00594911	0.000962904
chr1_100353000_100353600	0.157514	0.00587767	0.994735	-0.259114	-2.44459	-0.0049293	0.182235	0.872515	0.745587	NA	NA	NA	NA	NA	NA	NA
chr1_100359600_100360200	0.580776	0.806502	0.00614105	-0.151157	-0.346836	-3.34055	0.27301	1.41305	1.19874	NA	NA	NA	NA	NA	NA	NA
chr1_1003800_1004400	0.868021	0.0197349	8.99251e-05	-0.026798	-2.45465	-3.57302	0.16094	1.03957	0.883153	NA	NA	NA	NA	NA	NA	NA
chr1_10038000_10038600	0.988257	0.192425	0.0370285	0.00399578	-1.82184	-2.50322	0.270953	1.3903	1.1877	NA	NA	NA	NA	NA	NA	NA
chr1_10039200_10039800	0.448123	0.00205095	0.049649	-0.175235	-4.21192	-2.26123	0.230298	1.33812	1.14095	NA	NA	NA	NA	NA	NA	NA
chr1_10042800_10043400	0.0905765	0.0171071	0.0777866	-0.49028	-3.78716	-2.30394	0.2875	1.56745	1.29577	NA	NA	NA	NA	NA	NA	NA
chr1_1004400_1005000	0.539735	0.0745602	0.000419313	-0.0916216	-1.7039	-2.91107	0.149008	0.947697	0.803468	NA	NA	NA	NA	NA	NA	NA
chr1_10044000_10044600	0.761455	0.0136167	0.753293	0.0833034	-3.34317	-0.359529	0.273824	1.33617	1.14143	NA	NA	NA	NA	NA	NA	NA
chr1_10044600_10045200	0.434513	0.0252749	0.0699537	0.208839	-3.51301	-2.34773	0.266384	1.55176	1.2846	NA	NA	NA	NA	NA	NA	NA
chr1_10045800_10046400	0.143939	0.0135683	0.0270245	0.328281	-3.01998	-2.30668	0.223268	1.20636	1.03112	NA	NA	NA	NA	NA	NA	NA
chr1_100464000_100464600	0.457488	0.0394048	0.577797	0.217708	-3.06655	-0.686433	0.292123	1.47332	1.23007	NA	NA	NA	NA	NA	NA	NA
chr1_100498800_100499400	0.727412	0.025129	0.00132636	-0.0759752	-3.06066	-3.78091	0.217482	1.35057	1.15165	NA	NA	NA	NA	NA	NA	NA
chr1_1005000_1005600	0.625737	0.0112614	0.466174	0.0825538	-2.17173	-0.52966	0.168847	0.844375	0.72465	NA	NA	NA	NA	NA	NA	NA
chr1_10051800_10052400	0.544822	0.643154	0.00478869	0.165137	-0.672791	-3.48945	0.27198	1.44873	1.21523	NA	NA	NA	NA	NA	NA	NA
chr1_10052400_10053000	0.526335	0.409475	0.00310937	-0.167055	-1.20906	-3.69352	0.262929	1.46101	1.22531	NA	NA	NA	NA	NA	NA	NA
chr1_100531200_100531800	0.23132	0.109733	0.122394	0.319801	-2.16452	-1.78479	0.265899	1.34387	1.14766	NA	NA	NA	NA	NA	NA	NA
chr1_100538400_100539000	0.100142	0.0178111	0.0231141	0.368106	-2.9286	-2.39849	0.222256	1.21988	1.04311	NA	NA	NA	NA	NA	NA	NA
chr1_100539000_100539600	0.588975	0.0467297	0.174889	0.0770062	-1.39578	-0.821125	0.142157	0.695003	0.601874	NA	NA	NA	NA	NA	NA	NA
chr1_100539600_100540200	0.75829	0.000534567	0.321585	0.0483067	-3.11016	-0.742794	0.156642	0.87528	0.746463	NA	NA	NA	NA	NA	NA	NA
chr1_100540200_100540800	0.90319	0.00315738	0.0762561	-0.026459	-3.46394	-1.76028	0.217097	1.15105	0.984831	NA	NA	NA	NA	NA	NA	NA
chr1_100557000_100557600	0.748677	0.00620843	0.123465	-0.0783441	-3.68682	-1.75292	0.244002	1.32478	1.13042	NA	NA	NA	NA	NA	NA	NA
chr1_1005600_1006200	0.548157	0.0436731	0.00738798	0.115859	-2.13832	-2.42044	0.192414	1.04947	0.889035	NA	NA	NA	NA	NA	NA	NA
chr1_100564800_100565400	0.733856	0.650861	0.00848067	0.0935184	-0.650785	-3.25582	0.274451	1.43459	1.21761	NA	NA	NA	NA	NA	NA	NA
chr1_100565400_100566000	0.198798	0.340787	0.0105546	0.34478	-1.38952	-3.15512	0.266916	1.45317	1.21559	NA	NA	NA	NA	NA	NA	NA
chr1_10058400_10059000	0.0549183	0.106127	0.00518382	-0.464247	-2.14269	-3.19587	0.239628	1.31663	1.12348	NA	NA	NA	NA	NA	NA	NA
chr1_10059000_10059600	0.561589	0.0362078	0.0236624	-0.134198	-2.54727	-2.35692	0.230576	1.20325	1.02917	NA	NA	NA	NA	NA	NA	NA
chr1_100592400_100593000	0.0586614	0.0151383	0.226969	0.514283	-3.63238	-1.50515	0.269557	1.47512	1.23975	NA	NA	NA	NA	NA	NA	NA
chr1_10059600_10060200	0.480244	0.015537	0.0777719	-0.180616	-3.51348	-2.15851	0.255109	1.43252	1.21392	NA	NA	NA	NA	NA	NA	NA
chr1_100603200_100603800	0.946603	0.905844	0.181505	-0.0181766	-0.133881	-1.29915	0.270865	1.12962	0.966992	NA	NA	NA	NA	NA	NA	NA
chr1_100603800_100604400	0.348208	0.146685	0.0124231	-0.236917	-1.95825	-2.90374	0.251624	1.34103	1.145	NA	NA	NA	NA	NA	NA	NA
chr1_100615800_100616400	0.600418	0.104264	0.450546	-0.104874	-1.5097	-0.596634	0.199716	0.922668	0.788323	NA	NA	NA	NA	NA	NA	NA
chr1_100616400_100617000	0.714411	0.115531	0.865406	-0.110846	-2.1591	-0.197754	0.302233	1.36251	1.16435	NA	NA	NA	NA	NA	NA	NA
chr1_1006200_1006800	0.182533	4.68904e-46	1.78088e-58	0.169826	3.15387	3.83996	0.126706	0.140519	0.130829	0	0.000300961	-0.686093	0.191994	-3.57351	0.00190178	0.000431827
chr1_100637400_100638000	0.292761	0.00603666	0.332714	-0.271161	-3.72577	-1.10807	0.25667	1.33415	1.13956	NA	NA	NA	NA	NA	NA	NA
chr1_100638000_100638600	0.55908	0.0111683	0.415421	-0.153131	-3.43245	-0.930089	0.261426	1.33298	1.13833	NA	NA	NA	NA	NA	NA	NA
chr1_100647000_100647600	0.342919	0.157747	0.19741	0.265357	-1.88	-1.46659	0.278745	1.32295	1.13185	NA	NA	NA	NA	NA	NA	NA
chr1_1006800_1007400	0.400615	1.20267e-47	8.65357e-60	0.114554	3.3892	4.09634	0.135832	0.145699	0.135822	0	0.000265179	-0.707135	0.199188	-3.55008	0.00200802	0.00045014
chr1_10068000_10068600	0.982873	0.0749899	0.00124569	-0.0051012	-2.5839	-3.99593	0.237156	1.4393	1.21008	NA	NA	NA	NA	NA	NA	NA
chr1_100713000_100713600	0.661318	0.125543	0.00832756	-0.0893276	-1.59502	-2.34983	0.203423	1.03434	0.876667	NA	NA	NA	NA	NA	NA	NA
chr1_100731600_100732200	0.232876	0.27941	0.060316	0.379049	-1.22057	1.82779	0.316218	1.12362	0.964352	0.107426	0.0911462	-3.04835	1.48071	-2.05871	0.0527855	0.00499185
chr1_10074600_10075200	0.973575	0.462292	0.0798632	-0.00911267	-0.967857	-1.98088	0.274562	1.31268	1.12193	NA	NA	NA	NA	NA	NA	NA
chr1_10083000_10083600	0.168204	0.485482	0.194727	0.47853	0.976308	-1.55493	0.345285	1.39561	1.1928	0.176379	0.195072	2.53124	1.83589	1.37875	0.183199	0.0137249
chr1_100845000_100845600	0.874233	0.0620917	0.923635	-0.0396216	-2.00455	-0.087067	0.249816	1.06499	0.906507	NA	NA	NA	NA	NA	NA	NA
chr1_100845600_100846200	0.866853	0.0451264	0.929015	0.045329	-2.37508	0.0898099	0.26982	1.1738	1.00615	0.0315202	0.576559	-2.46489	1.54601	-1.59436	0.126538	0.0100728
chr1_100894800_100895400	0.396026	0.00285583	0.158897	-0.203014	-3.85766	-1.53503	0.238386	1.26816	1.08321	NA	NA	NA	NA	NA	NA	NA
chr1_100895400_100896000	0.106685	2.92743e-05	0.297075	-0.281911	-4.30499	-0.88004	0.173507	0.992908	0.840515	NA	NA	NA	NA	NA	NA	NA
chr1_100896000_100896600	0.780936	0.0156528	0.0189504	-0.0581331	-2.70761	-2.24817	0.208595	1.10522	0.945845	NA	NA	NA	NA	NA	NA	NA
chr1_100949400_100950000	0.307082	0.257595	0.266084	-0.245352	-1.18751	-0.990329	0.239255	1.04425	0.886567	NA	NA	NA	NA	NA	NA	NA
chr1_100950000_100950600	0.828353	0.164079	0.493329	-0.0646984	-1.97106	-0.826388	0.297791	1.40834	1.20288	NA	NA	NA	NA	NA	NA	NA
chr1_100982400_100983000	0.314125	0.024878	0.0655292	-0.244235	-2.90602	-2.03091	0.241671	1.28007	1.09326	NA	NA	NA	NA	NA	NA	NA
chr1_101025600_101026200	0.629291	0.00515893	0.0986009	0.0833692	-2.75625	-1.36322	0.172287	0.968379	0.819306	NA	NA	NA	NA	NA	NA	NA
chr1_101026200_101026800	0.420126	0.0410789	0.00306431	0.179045	-2.5953	-3.2424	0.221364	1.25758	1.07396	NA	NA	NA	NA	NA	NA	NA
chr1_10107600_10108200	0.00382707	0.0333523	0.805521	-0.964049	-3.56669	-0.338714	0.327213	1.65801	1.37285	NA	NA	NA	NA	NA	NA	NA
chr1_10108200_10108800	0.799527	0.138431	0.554924	-0.0911078	-2.22513	0.748896	0.357999	1.49235	1.2651	0.061947	0.423911	-2.97403	1.95642	-1.52014	0.144128	0.0112211
chr1_101095200_101095800	0.253754	0.0506903	0.783105	0.352271	-2.95232	-0.348675	0.307266	1.49653	1.26397	NA	NA	NA	NA	NA	NA	NA
chr1_101095800_101096400	0.801715	0.0236036	0.670017	0.0733923	-3.42103	-0.538502	0.29164	1.49319	1.26079	NA	NA	NA	NA	NA	NA	NA
chr1_101208000_101208600	0.886584	0.0463204	0.011132	0.0476088	-2.42411	2.66185	0.333128	1.20475	1.03325	0.0319573	0.037834	-5.08596	1.58715	-3.20447	0.00445058	0.000783696
chr1_1012200_1012800	0.341314	0.400676	0.0498825	0.278611	-1.24842	-2.49607	0.291693	1.4805	1.26075	NA	NA	NA	NA	NA	NA	NA
chr1_101235600_101236200	0.574214	4.22325e-05	0.741589	0.0959782	-3.9524	-0.260646	0.170381	0.93162	0.788713	NA	NA	NA	NA	NA	NA	NA
chr1_101236200_101236800	0.995899	0.000147951	0.0127858	0.00107277	-5.61528	-3.04064	0.208293	1.4352	1.20402	NA	NA	NA	NA	NA	NA	NA
chr1_101236800_101237400	0.0100713	0.0290059	0.0441016	-0.536331	-2.35958	-1.84803	0.205295	1.06844	0.908874	NA	NA	NA	NA	NA	NA	NA
chr1_101238600_101239200	0.293315	0.0675416	0.173581	0.282009	-2.47375	-1.56887	0.267246	1.34166	1.14645	NA	NA	NA	NA	NA	NA	NA
chr1_101239200_101239800	0.952291	0.00100057	0.0720477	0.0130555	-4.28638	-1.97101	0.217778	1.27248	1.0866	NA	NA	NA	NA	NA	NA	NA
chr1_101239800_101240400	0.660698	0.718434	0.0555359	0.0886325	-0.333043	-1.51446	0.201447	0.921651	0.783727	NA	NA	NA	NA	NA	NA	NA
chr1_101257800_101258400	0.545463	0.691142	0.0019232	0.163682	0.332509	2.29109	0.270013	0.835004	0.723226	0.244365	0.0187032	-1.95858	1.10467	-1.77301	0.0914585	0.00772847
chr1_1012800_1013400	0.0755756	0.174421	1.89119e-08	0.380723	-0.800518	3.0838	0.212504	0.586129	0.513725	0.0733663	0.00496056	-3.88431	0.779398	-4.98374	7.13487e-05	7.75709e-05
chr1_101283600_101284200	0.980078	0.00773324	0.0511546	-0.00617448	-3.85544	-2.38614	0.246782	1.4245	1.212	NA	NA	NA	NA	NA	NA	NA
chr1_101284200_101284800	0.471983	0.00719496	0.063669	-0.178942	-3.89183	-2.26715	0.248045	1.42464	1.21185	NA	NA	NA	NA	NA	NA	NA
chr1_101309400_101310000	0.366201	0.0139847	0.0736146	-0.236986	-2.59689	1.5932	0.261328	1.04204	0.883196	0.0187162	0.102573	-4.19009	1.36597	-3.06748	0.00607642	0.000976586
chr1_10131000_10131600	0.726331	0.00179247	0.0903191	-0.0749306	-3.77312	-1.7274	0.213609	1.18282	1.01213	NA	NA	NA	NA	NA	NA	NA
chr1_101312400_101313000	0.0302809	0.0263743	0.00613499	-0.559044	-3.427	-3.51254	0.255165	1.52525	1.2603	NA	NA	NA	NA	NA	NA	NA
chr1_101314200_101314800	0.0624541	0.00986996	0.0360444	-0.535697	-2.94935	2.04388	0.285009	1.12581	0.964599	0.0162549	0.0681553	-4.99323	1.48253	-3.36805	0.00305845	0.000600429
chr1_101315400_101316000	0.110438	0.0615644	0.00147297	0.332594	-2.13524	-3.14965	0.206909	1.1321	0.968873	NA	NA	NA	NA	NA	NA	NA
chr1_10131600_10132200	0.935908	0.02685	0.0547919	0.0196299	-2.9167	-2.1563	0.243627	1.30229	1.11242	NA	NA	NA	NA	NA	NA	NA
chr1_1013400_1014000	0.8912	0.155295	7.03024e-09	0.0233414	-0.686952	2.62306	0.1703	0.480533	0.422579	0.0672627	0.00468136	-3.31002	0.63991	-5.17262	4.62773e-05	6.3957e-05
chr1_101353200_101353800	0.404924	0.0132288	0.720486	-0.240936	-3.69332	-0.448222	0.288324	1.46981	1.24991	NA	NA	NA	NA	NA	NA	NA
chr1_101360400_101361000	0.520185	0.0306426	0.0520063	0.159763	-2.85584	-2.18972	0.247751	1.30639	1.11635	NA	NA	NA	NA	NA	NA	NA
chr1_101361000_101361600	0.556499	0.00273538	0.0920753	-0.139025	-3.98947	-1.89092	0.235792	1.30552	1.11404	NA	NA	NA	NA	NA	NA	NA
chr1_101361600_101362200	0.695769	0.11452	0.0895177	-0.105283	-2.18063	-2.00484	0.268629	1.37224	1.17173	NA	NA	NA	NA	NA	NA	NA
chr1_101362200_101362800	0.417747	0.248948	0.0502799	0.210233	-1.45778	-2.12715	0.258594	1.25865	1.0763	NA	NA	NA	NA	NA	NA	NA
chr1_101362800_101363400	0.992613	0.629778	0.0274226	0.00264019	-0.687404	-2.70984	0.284589	1.42258	1.21454	NA	NA	NA	NA	NA	NA	NA
chr1_101370600_101371200	0.035775	0.574483	0.588197	0.704232	-0.795955	-0.654744	0.331867	1.41398	1.20617	NA	NA	NA	NA	NA	NA	NA
chr1_101386200_101386800	0.356211	0.264872	0.161418	-0.26213	-1.54471	-1.6593	0.283084	1.37934	1.17804	NA	NA	NA	NA	NA	NA	NA
chr1_101386800_101387400	0.18621	0.00154481	0.275809	-0.341285	-4.70217	-1.35191	0.256788	1.45302	1.2352	NA	NA	NA	NA	NA	NA	NA
chr1_101387400_101388000	0.295073	0.0141104	0.320397	0.28884	-3.67526	-1.24289	0.274722	1.47673	1.24595	NA	NA	NA	NA	NA	NA	NA
chr1_1014000_1014600	0.186099	0.00600947	0.129451	0.18543	-2.11567	-0.9982	0.139485	0.757176	0.654056	NA	NA	NA	NA	NA	NA	NA
chr1_101410800_101411400	0.586136	0.00810648	0.0628747	-0.14296	-4.05201	-2.33621	0.261911	1.50637	1.24496	NA	NA	NA	NA	NA	NA	NA
chr1_101419200_101419800	0.118138	0.0723402	0.324947	0.445348	-2.58367	-1.2014	0.283069	1.42584	1.21579	NA	NA	NA	NA	NA	NA	NA
chr1_101446800_101447400	0.951151	0.000962512	0.317389	0.0149408	-4.53071	-1.1474	0.243405	1.34038	1.14307	NA	NA	NA	NA	NA	NA	NA
chr1_101447400_101448000	0.297375	0.00106427	0.518665	0.260369	-4.40835	-0.727025	0.24883	1.31595	1.12333	NA	NA	NA	NA	NA	NA	NA
chr1_1014600_1015200	0.319715	0.000269993	0.0390453	0.181811	-4.09398	-1.94491	0.182002	1.09251	0.93269	NA	NA	NA	NA	NA	NA	NA
chr1_101501400_101502000	0.582037	0.136749	5.9234e-05	0.153932	1.15987	2.80468	0.278951	0.774549	0.674981	0.0614233	0.00941318	-1.64482	1.02739	-1.60097	0.125061	0.00997463
chr1_101502000_101502600	0.883431	0.441958	0.583943	0.0422607	-0.855253	0.518164	0.287651	1.10884	0.943769	0.161541	0.43954	-1.37342	1.4561	-0.943216	0.356826	0.0248632
chr1_10151400_10152000	0.0473432	0.484797	0.0942063	-0.662591	-1.18009	-2.40999	0.330859	1.68426	1.42923	NA	NA	NA	NA	NA	NA	NA
chr1_1015200_1015800	0.528461	7.7644e-05	0.15118	0.115897	-4.28517	-1.28775	0.183354	1.04914	0.89175	NA	NA	NA	NA	NA	NA	NA
chr1_101534400_101535000	0.289659	0.0930974	0.409015	0.349277	-2.76076	-1.11803	0.328483	1.63167	1.34968	NA	NA	NA	NA	NA	NA	NA
chr1_1015800_1016400	0.835752	0.00687432	0.0190179	0.048969	-3.81677	-2.81368	0.235705	1.38908	1.18445	NA	NA	NA	NA	NA	NA	NA
chr1_101602200_101602800	0.193167	0.0031213	0.175858	-0.337739	-4.49324	-1.69821	0.258171	1.49123	1.24758	NA	NA	NA	NA	NA	NA	NA
chr1_101602800_101603400	0.800701	3.65218e-05	0.908577	-0.0581743	-5.11924	-0.117677	0.229967	1.19619	1.02272	NA	NA	NA	NA	NA	NA	NA
chr1_101608800_101609400	0.887946	0.0437355	0.769256	-0.0409632	-2.63622	0.325658	0.290135	1.29423	1.10777	0.0310533	0.525381	-2.96188	1.70358	-1.73862	0.0974738	0.0081405
chr1_1016400_1017000	0.0211988	0.232084	0.0278903	-0.628172	-1.67058	-2.64286	0.269214	1.39129	1.18816	NA	NA	NA	NA	NA	NA	NA
chr1_10165800_10166400	0.0408196	0.00922387	0.0334134	0.529984	-4.03153	-2.70941	0.256476	1.52476	1.25994	NA	NA	NA	NA	NA	NA	NA
chr1_101664600_101665200	0.807309	8.24277e-32	1.0628e-51	-0.0753332	5.16419	7.68079	0.308228	0.326608	0.302058	0	0.000480375	-2.5166	0.444873	-5.65689	1.5489e-05	3.5634e-05
chr1_101665200_101665800	0.222971	0.180793	0.0135768	0.400857	-1.51137	2.41463	0.327324	1.12311	0.964638	0.0754565	0.0415662	-3.926	1.4805	-2.6518	0.0153063	0.00194326
chr1_10167600_10168200	0.532326	0.000138788	0.48018	0.117902	-3.99989	-0.610335	0.188291	1.01783	0.861935	NA	NA	NA	NA	NA	NA	NA
chr1_10168200_10168800	0.446262	0.00374259	0.242549	0.14073	-2.89236	-0.972297	0.184193	0.979261	0.82812	NA	NA	NA	NA	NA	NA	NA
chr1_1017000_1017600	0.497599	0.249843	0.466963	0.130376	-0.976625	-0.528901	0.191666	0.84482	0.724896	NA	NA	NA	NA	NA	NA	NA
chr1_10173600_10174200	0.314082	0.018354	0.461978	0.257913	-2.96308	-0.782402	0.255183	1.24019	1.06041	NA	NA	NA	NA	NA	NA	NA
chr1_1017600_1018200	0.549589	0.00493898	0.423555	0.147863	-3.42856	-0.823744	0.246448	1.19838	1.02601	NA	NA	NA	NA	NA	NA	NA
chr1_101786400_101787000	0.653522	0.0498577	0.000517651	0.0937024	-2.45501	-3.77415	0.208256	1.23987	1.05937	NA	NA	NA	NA	NA	NA	NA
chr1_1018200_1018800	0.205781	0.00524691	0.000642205	-0.220914	-3.11789	-3.28503	0.173707	1.09765	0.938589	NA	NA	NA	NA	NA	NA	NA
chr1_10184400_10185000	0.0971021	0.0610323	0.0974028	-0.472376	-2.94076	-2.14958	0.282623	1.55594	1.28727	NA	NA	NA	NA	NA	NA	NA
chr1_101846400_101847000	0.461473	0.0504264	0.00133635	0.174167	-2.84426	-3.96085	0.235787	1.44008	1.2073	NA	NA	NA	NA	NA	NA	NA
chr1_1018800_1019400	0.116642	0.000154601	0.00749743	-0.275763	-4.53007	-2.69812	0.174558	1.16137	0.992906	NA	NA	NA	NA	NA	NA	NA
chr1_101882400_101883000	0.19652	0.0077488	0.0512916	-0.31104	-3.66477	-2.27289	0.239568	1.3544	1.15516	NA	NA	NA	NA	NA	NA	NA
chr1_10193400_10194000	0.571488	0.00652779	0.0186518	-0.135496	-4.02762	-2.91841	0.23883	1.45631	1.22467	NA	NA	NA	NA	NA	NA	NA
chr1_10195200_10195800	0.0893427	0.0221595	0.113107	-0.497526	-3.52664	-2.00874	0.290618	1.52273	1.25909	NA	NA	NA	NA	NA	NA	NA
chr1_10195800_10196400	0.124573	0.139185	0.0586641	-0.40394	-1.98513	-2.17304	0.261269	1.33395	1.13899	NA	NA	NA	NA	NA	NA	NA
chr1_101996400_101997000	0.691127	0.319705	0.000901734	0.0779985	-1.02779	-2.96475	0.195862	1.02885	0.872068	NA	NA	NA	NA	NA	NA	NA
chr1_101997000_101997600	0.549637	0.332551	0.000494315	0.115404	-1.01531	-3.1605	0.19237	1.04381	0.883823	NA	NA	NA	NA	NA	NA	NA
chr1_10204200_10204800	0.178335	0.027614	0.672917	-0.414762	-3.47584	-0.552015	0.306463	1.55982	1.3046	NA	NA	NA	NA	NA	NA	NA
chr1_10204800_10205400	0.372134	0.0540647	0.133266	-0.257682	-3.08927	-1.98468	0.287704	1.58886	1.31348	NA	NA	NA	NA	NA	NA	NA
chr1_10205400_10206000	0.270384	0.0618277	0.0140857	0.289049	-2.87272	-3.13668	0.26111	1.52468	1.26	NA	NA	NA	NA	NA	NA	NA
chr1_102058200_102058800	0.187889	0.138096	0.00336809	0.336566	-2.22413	-3.74182	0.25421	1.4904	1.25216	NA	NA	NA	NA	NA	NA	NA
chr1_1020600_1021200	0.392237	0.785448	0.045655	0.23702	-0.344261	-2.18005	0.276089	1.26195	1.0801	NA	NA	NA	NA	NA	NA	NA
chr1_10209600_10210200	0.368844	0.0374528	0.188019	0.154444	-1.8462	-0.994447	0.171253	0.877961	0.751334	NA	NA	NA	NA	NA	NA	NA
chr1_10210200_10210800	0.109391	0.988926	0.00269475	0.296325	0.0123879	-2.31722	0.183798	0.890759	0.757097	0.329005	0.0209605	2.32961	1.16904	1.99276	0.0601118	0.00552232
chr1_10210800_10211400	0.71102	0.00504604	0.0335052	-0.0882611	-3.97001	-2.54865	0.237698	1.39116	1.18581	NA	NA	NA	NA	NA	NA	NA
chr1_1021200_1021800	0.870482	0.0364321	0.277423	0.0295112	-1.55138	0.69433	0.180633	0.733713	0.636532	0.0284324	0.253062	-2.24571	0.971344	-2.31196	0.0315547	0.00335794
chr1_102120000_102120600	0.642311	0.0254227	0.166694	0.134006	-3.62321	-1.84189	0.287824	1.60208	1.32427	NA	NA	NA	NA	NA	NA	NA
chr1_102120600_102121200	0.50546	0.000560601	0.0770091	0.135712	-4.06022	-1.74973	0.203218	1.1471	0.981464	NA	NA	NA	NA	NA	NA	NA
chr1_1021800_1022400	0.924534	4.68871e-05	0.00351106	-0.0216159	-3.91661	2.34603	0.227745	0.929063	0.788676	0.00320668	0.0232495	-6.26264	1.21867	-5.13889	4.99859e-05	6.52351e-05
chr1_10219200_10219800	0.8382	0.191003	0.00213169	0.0526441	-1.96508	-3.87329	0.257283	1.49479	1.23533	NA	NA	NA	NA	NA	NA	NA
chr1_102210600_102211200	0.157342	0.0872597	0.245414	0.378418	-2.25085	-1.30232	0.266031	1.3061	1.116	NA	NA	NA	NA	NA	NA	NA
chr1_102211200_102211800	0.896973	0.0630431	0.897599	0.0348398	-2.24877	-0.132398	0.268525	1.19914	1.02672	NA	NA	NA	NA	NA	NA	NA
chr1_102234600_102235200	0.56716	0.0152833	0.388539	0.116232	-2.41006	-0.717387	0.202587	0.980156	0.829123	NA	NA	NA	NA	NA	NA	NA
chr1_1022400_1023000	0.142025	0.0986642	0.000207069	0.297435	-1.97779	-3.88377	0.201315	1.1889	1.01648	NA	NA	NA	NA	NA	NA	NA
chr1_1023000_1023600	0.699452	0.0363028	0.00106978	0.0768647	-2.514	-3.40302	0.198651	1.18814	1.01632	NA	NA	NA	NA	NA	NA	NA
chr1_10230600_10231200	0.734004	0.163613	0.854332	-0.0990388	-1.70267	0.191678	0.29082	1.21522	1.04191	0.0699113	0.555504	-1.89435	1.60073	-1.18343	0.250515	0.0180252
chr1_102312000_102312600	0.997964	0.0130032	0.894231	-0.000646366	-2.78411	0.125892	0.25281	1.10517	0.945004	0.0181711	0.567464	-2.91	1.45411	-2.00122	0.0591237	0.0054541
chr1_102312600_102313200	0.693492	0.00497223	0.922542	-0.103447	-3.46742	0.10119	0.261879	1.21292	1.03864	0.0125123	0.575029	-3.56861	1.59686	-2.23477	0.0370033	0.00379946
chr1_1023600_1024200	0.171956	0.0379462	0.0239348	0.224704	-1.92299	-1.78088	0.163577	0.916882	0.779185	NA	NA	NA	NA	NA	NA	NA
chr1_1024200_1024800	0.790365	0.0885106	6.83386e-06	0.0443621	0.758166	1.82836	0.166526	0.4417	0.389532	0.0459944	0.00789431	-1.0702	0.588926	-1.8172	0.0842022	0.007229
chr1_102434400_102435000	0.274317	0.558437	0.576286	0.261528	0.493949	0.405327	0.238205	0.841893	0.723458	0.200868	0.435489	0.0886219	1.11003	0.0798371	0.93716	0.0627399
chr1_102442200_102442800	0.820148	0.00555215	0.205565	-0.0580577	-4.0037	-1.53508	0.254834	1.41911	1.20647	NA	NA	NA	NA	NA	NA	NA
chr1_10247400_10248000	0.861371	0.00941399	0.0133247	0.0406213	-3.64106	-2.95429	0.232144	1.38089	1.17696	NA	NA	NA	NA	NA	NA	NA
chr1_1024800_1025400	0.54912	0.0305947	3.00963e-06	0.103735	0.967163	1.90875	0.172695	0.442294	0.390492	0.0262249	0.0073942	-0.941589	0.590006	-1.5959	0.126193	0.0100501
chr1_10248000_10248600	0.735209	0.00310925	0.0409841	0.0780008	-4.01864	-2.34831	0.230127	1.33316	1.13736	NA	NA	NA	NA	NA	NA	NA
chr1_102486000_102486600	0.183622	0.32025	0.0140302	0.372882	-1.51223	-3.21548	0.278902	1.5155	1.29088	NA	NA	NA	NA	NA	NA	NA
chr1_102537000_102537600	0.672026	0.232001	0.275296	-0.121571	-1.64219	-1.27952	0.286486	1.3674	1.1678	NA	NA	NA	NA	NA	NA	NA
chr1_1025400_1026000	0.939101	0.0221624	0.00471429	0.0171198	-3.04387	-3.22757	0.22364	1.31431	1.12197	NA	NA	NA	NA	NA	NA	NA
chr1_102553800_102554400	0.226685	0.00712634	0.16191	-0.306539	-3.65445	-1.60529	0.252333	1.33611	1.14104	NA	NA	NA	NA	NA	NA	NA
chr1_1026000_1026600	0.696689	0.0192831	0.849237	-0.0777419	-2.24668	-0.153689	0.198992	0.947899	0.806851	NA	NA	NA	NA	NA	NA	NA
chr1_102658800_102659400	0.930182	0.00380218	0.300345	0.018682	-3.11255	-0.935111	0.212805	1.05567	0.899204	NA	NA	NA	NA	NA	NA	NA
chr1_102659400_102660000	0.574982	0.0139017	0.273885	-0.0919939	-2.10036	-0.793053	0.163637	0.842051	0.721674	NA	NA	NA	NA	NA	NA	NA
chr1_1026600_1027200	0.366149	0.00111401	0.980815	0.148411	-2.73085	-0.016942	0.163637	0.818566	0.703164	NA	NA	NA	NA	NA	NA	NA
chr1_102660000_102660600	0.367957	0.0225512	0.0561493	-0.162088	-2.25219	-1.59152	0.179396	0.975353	0.8257	NA	NA	NA	NA	NA	NA	NA
chr1_102660600_102661200	0.69608	0.00982547	0.0789098	0.0889507	-3.11466	-1.8016	0.227203	1.18817	1.01712	NA	NA	NA	NA	NA	NA	NA
chr1_1027200_1027800	0.0664219	0.0952554	0.0542404	0.291456	-1.35921	-1.35157	0.157419	0.808665	0.695653	NA	NA	NA	NA	NA	NA	NA
chr1_1027800_1028400	0.652455	0.0345672	0.411131	0.0769873	-1.76212	-0.58367	0.170544	0.824829	0.707804	NA	NA	NA	NA	NA	NA	NA
chr1_102826800_102827400	0.845489	0.034865	0.0666446	0.0494722	-2.89159	-2.14006	0.253346	1.35579	1.15683	NA	NA	NA	NA	NA	NA	NA
chr1_1028400_1029000	0.769513	0.002093	0.0173022	0.0639929	-4.22731	-2.76626	0.217931	1.34575	1.14697	NA	NA	NA	NA	NA	NA	NA
chr1_102853200_102853800	0.272376	0.00229755	0.0442996	-0.271514	-4.74298	-2.58136	0.246297	1.52425	1.27073	NA	NA	NA	NA	NA	NA	NA
chr1_102853800_102854400	0.585649	0.000887653	0.0343088	-0.121661	-4.67857	-2.5071	0.2226	1.37428	1.17184	NA	NA	NA	NA	NA	NA	NA
chr1_102854400_102855000	0.89886	0.227613	0.00530961	0.0322682	-1.68379	-3.35943	0.253371	1.38882	1.18437	NA	NA	NA	NA	NA	NA	NA
chr1_10285800_10286400	0.708111	0.0341821	0.167843	-0.10562	-3.26426	-1.74832	0.281477	1.52464	1.26043	NA	NA	NA	NA	NA	NA	NA
chr1_102868800_102869400	0.595717	0.0042827	0.383297	-0.139813	-4.1401	-1.0581	0.26285	1.42327	1.20945	NA	NA	NA	NA	NA	NA	NA
chr1_1029000_1029600	0.390332	0.015153	0.209612	0.215309	-3.14506	-1.37586	0.24979	1.2774	1.09107	NA	NA	NA	NA	NA	NA	NA
chr1_102933000_102933600	0.177567	0.0379979	0.926671	-0.39739	-2.86817	0.107773	0.293105	1.36792	1.1687	0.0289943	0.576036	-2.97595	1.79918	-1.65405	0.113727	0.00922697
chr1_102933600_102934200	0.716781	0.00952268	0.675994	0.0831625	-2.62888	0.354153	0.228737	0.998574	0.845432	0.0160312	0.484937	-2.98303	1.3084	-2.27991	0.0337205	0.00353887
chr1_1030200_1030800	0.303962	0.00218457	0.000995919	-0.226285	-4.67237	-4.15675	0.219237	1.49387	1.23349	NA	NA	NA	NA	NA	NA	NA
chr1_103027800_103028400	0.558124	0.144691	0.558358	-0.177205	-2.07987	-0.709855	0.30179	1.41722	1.20964	NA	NA	NA	NA	NA	NA	NA
chr1_103050600_103051200	0.930348	0.0318954	0.310559	0.0239829	-3.06611	-1.22763	0.273838	1.41321	1.2058	NA	NA	NA	NA	NA	NA	NA
chr1_103051200_103051800	0.25525	0.0621016	0.184179	-0.292731	-2.37945	-1.44288	0.256143	1.26422	1.0806	NA	NA	NA	NA	NA	NA	NA
chr1_103064400_103065000	0.537612	0.356996	0.0329232	0.175095	-1.36591	-2.70964	0.283277	1.47751	1.25648	NA	NA	NA	NA	NA	NA	NA
chr1_103108200_103108800	0.0111346	0.0258913	0.896705	-0.700029	-2.7105	0.134042	0.271738	1.20239	1.03042	0.0243078	0.568107	-2.84454	1.58351	-1.79635	0.0875613	0.00745994
chr1_1031400_1032000	0.875105	0.00310042	0.141536	-0.0389905	-4.14385	-1.73528	0.247567	1.37428	1.17305	NA	NA	NA	NA	NA	NA	NA
chr1_1032000_1032600	0.653504	0.00496362	0.30569	-0.0972274	-3.03117	-0.928557	0.216079	1.0601	0.90287	NA	NA	NA	NA	NA	NA	NA
chr1_103251600_103252200	0.408196	0.0295813	0.737608	-0.247064	-3.28416	-0.418918	0.297733	1.4925	1.24768	NA	NA	NA	NA	NA	NA	NA
chr1_103252200_103252800	0.43093	0.0429857	0.856073	-0.246226	-3.09444	-0.230028	0.311633	1.51367	1.26567	NA	NA	NA	NA	NA	NA	NA
chr1_1032600_1033200	0.901813	0.00104959	0.00282922	0.0236759	-4.4641	-3.45506	0.191525	1.33093	1.13468	NA	NA	NA	NA	NA	NA	NA
chr1_1033200_1033800	0.793465	0.00140052	0.0157176	0.0507927	-3.81524	-2.44587	0.193596	1.16804	0.999016	NA	NA	NA	NA	NA	NA	NA
chr1_103377000_103377600	0.773991	0.703526	0.0292182	0.0769692	0.341021	1.69243	0.267468	0.894076	0.767378	0.248277	0.0608632	-1.35141	1.17824	-1.14698	0.264927	0.0189453
chr1_103377600_103378200	0.192499	0.204263	0.00708212	-0.341923	0.995055	1.85628	0.260975	0.779791	0.678137	0.083024	0.0309436	-0.861223	1.03341	-0.833377	0.414474	0.0285651
chr1_1033800_1034400	0.742881	0.064739	0.290001	-0.0660285	-1.80919	-0.874274	0.200843	0.971002	0.822809	NA	NA	NA	NA	NA	NA	NA
chr1_1034400_1035000	0.997605	0.295862	0.449564	-0.000481106	-0.727307	-0.456421	0.159943	0.692893	0.601752	NA	NA	NA	NA	NA	NA	NA
chr1_1035000_1035600	0.864004	0.0164712	0.29097	-0.030257	-2.21632	-0.823945	0.176295	0.911859	0.777008	NA	NA	NA	NA	NA	NA	NA
chr1_103525800_103526400	0.438344	0.000477082	0.460699	-0.167102	-3.88798	-0.685718	0.214939	1.08417	0.926719	NA	NA	NA	NA	NA	NA	NA
chr1_103547400_103548000	0.361051	0.739512	0.0980179	-0.276547	-0.474848	-2.02703	0.301686	1.425	1.21613	NA	NA	NA	NA	NA	NA	NA
chr1_103548000_103548600	0.416878	0.79586	0.0510819	0.24504	-0.378282	-2.45206	0.300845	1.45913	1.24508	NA	NA	NA	NA	NA	NA	NA
chr1_1035600_1036200	0.805408	0.0537164	0.482736	-0.0318984	-1.14398	-0.360119	0.129213	0.587505	0.511551	NA	NA	NA	NA	NA	NA	NA
chr1_103569600_103570200	0.0698099	0.000918066	0.0459892	0.416963	-4.79741	-2.42525	0.228029	1.41337	1.20346	NA	NA	NA	NA	NA	NA	NA
chr1_103570200_103570800	0.687645	0.000398955	0.0692995	0.0898377	-4.95086	-2.12506	0.222937	1.36113	1.16	NA	NA	NA	NA	NA	NA	NA
chr1_103616400_103617000	0.615124	0.000256433	0.00502024	-0.032623	-1.33512	-0.893709	0.0647266	0.354929	0.31298	NA	NA	NA	NA	NA	NA	NA
chr1_1036200_1036800	0.764396	0.00601243	0.0707494	0.0511518	-2.67659	-1.47713	0.170304	0.957979	0.810559	NA	NA	NA	NA	NA	NA	NA
chr1_10365000_10365600	0.138161	0.0980991	0.331306	-0.449886	-2.58795	-1.28252	0.301521	1.55303	1.31512	NA	NA	NA	NA	NA	NA	NA
chr1_1036800_1037400	0.434785	0.0681929	0.0217049	0.122751	-1.5947	-1.72644	0.156668	0.866981	0.742836	NA	NA	NA	NA	NA	NA	NA
chr1_1037400_1038000	0.508481	0.00851969	0.456785	0.0963744	-1.91091	-0.462125	0.145344	0.715075	0.619113	NA	NA	NA	NA	NA	NA	NA
chr1_10376400_10377000	0.935523	0.0148019	0.457745	-0.0223671	-3.54906	-0.90129	0.275937	1.43635	1.21005	NA	NA	NA	NA	NA	NA	NA
chr1_10378200_10378800	0.153426	0.0380585	0.204226	0.376473	-2.77903	-1.445	0.262148	1.32583	1.13231	NA	NA	NA	NA	NA	NA	NA
chr1_1038000_1038600	0.20051	0.667946	0.953159	0.194136	-0.249954	0.0298037	0.15087	0.58133	0.50638	0.236976	0.582852	-0.279757	0.770951	-0.362873	0.720506	0.048569
chr1_103817400_103818000	0.385182	0.0205664	0.0313201	0.216379	-3.3152	-2.61952	0.248314	1.41362	1.20322	NA	NA	NA	NA	NA	NA	NA
chr1_1038600_1039200	0.76328	0.0555748	0.058807	0.065507	-2.04464	-1.72067	0.217038	1.05826	0.902401	NA	NA	NA	NA	NA	NA	NA
chr1_103923000_103923600	0.225344	0.0655257	0.0575502	0.326765	-2.74797	-2.37355	0.268202	1.47923	1.2385	NA	NA	NA	NA	NA	NA	NA
chr1_10395600_10396200	0.192188	0.146801	0.000292774	-0.307553	-2.07577	-4.44088	0.234577	1.42192	1.19229	NA	NA	NA	NA	NA	NA	NA
chr1_103960200_103960800	0.672338	0.0907536	0.0051688	-0.0841105	-1.78943	-2.53559	0.19841	1.04991	0.891055	NA	NA	NA	NA	NA	NA	NA
chr1_103960800_103961400	0.922158	0.046337	0.00313441	0.0205071	-2.31446	-2.96498	0.209449	1.15035	0.984469	NA	NA	NA	NA	NA	NA	NA
chr1_10396200_10396800	0.518606	0.140772	0.000182693	-0.151055	-2.13559	-4.65719	0.233362	1.44086	1.20804	NA	NA	NA	NA	NA	NA	NA
chr1_1039800_1040400	0.650461	0.585948	0.0170352	0.0789353	-0.468349	-1.77436	0.173791	0.857609	0.733891	NA	NA	NA	NA	NA	NA	NA
chr1_10398000_10398600	0.176575	0.0784837	0.345618	0.261093	-1.61225	-0.732132	0.192131	0.908906	0.773402	NA	NA	NA	NA	NA	NA	NA
chr1_10398600_10399200	0.955593	0.244501	0.717367	0.00849809	-0.75034	-0.202465	0.152311	0.641742	0.558083	NA	NA	NA	NA	NA	NA	NA
chr1_10399200_10399800	0.830354	0.0599033	0.111754	-0.0316674	-1.40198	-1.02153	0.147504	0.738486	0.63787	NA	NA	NA	NA	NA	NA	NA
chr1_10399800_10400400	0.879255	0.000537549	0.00530497	-0.0282478	-4.36041	-2.97413	0.185572	1.22769	1.04842	NA	NA	NA	NA	NA	NA	NA
chr1_10400400_10401000	0.0901195	0.0929434	0.00149815	0.415126	-2.46182	-3.94343	0.243081	1.45429	1.215	NA	NA	NA	NA	NA	NA	NA
chr1_1040400_1041000	0.999013	0.118623	0.121	-0.000199674	-1.24926	-1.06913	0.16102	0.795102	0.684882	NA	NA	NA	NA	NA	NA	NA
chr1_104044800_104045400	0.0683556	0.236185	4.78034e-05	0.47661	-0.925421	2.85227	0.25927	0.777534	0.677391	0.0932903	0.00922258	-3.77769	1.03122	-3.66332	0.00154356	0.000373712
chr1_104056800_104057400	0.667162	0.2462	0.00343908	0.113333	0.906328	2.01772	0.262923	0.777965	0.676759	0.0965335	0.023046	-1.11139	1.03113	-1.07784	0.293936	0.0208098
chr1_104073000_104073600	0.715301	0.000776864	0.0129823	-0.0709373	-4.07782	-2.55	0.194051	1.18405	1.012	NA	NA	NA	NA	NA	NA	NA
chr1_104073600_104074200	0.14831	4.64272e-05	0.0299323	-0.298008	-5.75109	-2.54216	0.204906	1.3634	1.15782	NA	NA	NA	NA	NA	NA	NA
chr1_10408200_10408800	0.889289	0.086771	0.615644	-0.0410034	-2.41135	-0.600362	0.293967	1.39705	1.19292	NA	NA	NA	NA	NA	NA	NA
chr1_10409400_10410000	0.527305	0.0107705	0.00399512	0.146368	-3.72737	-3.54116	0.230913	1.44014	1.20776	NA	NA	NA	NA	NA	NA	NA
chr1_1041000_1041600	0.97622	0.25943	0.0308403	0.00461434	-0.869341	-1.44602	0.154499	0.767427	0.662271	NA	NA	NA	NA	NA	NA	NA
chr1_10410000_10410600	0.233386	0.0231026	0.0739664	-0.306145	-3.28702	-2.16364	0.255679	1.4294	1.20091	NA	NA	NA	NA	NA	NA	NA
chr1_104137800_104138400	0.845659	0.64356	0.031931	-0.0615689	0.667266	-2.66056	0.315645	1.43859	1.22654	0.229054	0.0638739	3.32782	1.89049	1.7603	0.0936431	0.00788042
chr1_104153400_104154000	0.636966	0.00101475	0.00117265	0.0831215	-3.99139	-3.36651	0.175702	1.1864	1.01383	NA	NA	NA	NA	NA	NA	NA
chr1_1041600_1042200	0.720759	0.001142	0.5981	0.0601989	-2.94919	-0.399066	0.168042	0.886011	0.755146	NA	NA	NA	NA	NA	NA	NA
chr1_104172000_104172600	0.535678	0.000289512	0.0269166	-0.135229	-5.27656	-2.69117	0.217742	1.41546	1.20213	NA	NA	NA	NA	NA	NA	NA
chr1_104173200_104173800	0.444671	0.275601	0.164562	0.252612	-1.78253	-1.88454	0.329472	1.62793	1.34808	NA	NA	NA	NA	NA	NA	NA
chr1_10418400_10419000	0.892683	0.159176	0.149078	-0.0376384	-1.92822	-1.689	0.278431	1.36159	1.16355	NA	NA	NA	NA	NA	NA	NA
chr1_104217000_104217600	0.867818	0.0958313	0.00663904	0.0395567	-2.13879	-3.00422	0.237197	1.27471	1.08857	NA	NA	NA	NA	NA	NA	NA
chr1_104217600_104218200	0.773585	0.0330332	0.00757781	0.0689874	-3.01565	-3.19545	0.239289	1.39926	1.17754	NA	NA	NA	NA	NA	NA	NA
chr1_1042200_1042800	0.857628	0.000154553	0.729395	-0.0329838	-3.58729	0.270326	0.183489	0.919652	0.779726	0.00414675	0.508489	-3.85761	1.20571	-3.19946	0.00450176	0.00078999
chr1_104222400_104223000	0.86545	0.00791687	0.29921	0.0452494	-3.88712	-1.27962	0.266511	1.4406	1.22758	NA	NA	NA	NA	NA	NA	NA
chr1_10425600_10426200	0.553405	0.055567	0.256622	-0.154172	-2.40672	-1.21478	0.259443	1.24563	1.06603	NA	NA	NA	NA	NA	NA	NA
chr1_10426200_10426800	0.374428	1.8042e-05	0.734504	-0.191443	-4.78771	0.311066	0.21478	1.07422	0.915208	0.00258575	0.510585	-5.09877	1.41123	-3.61301	0.00173511	0.000405399
chr1_104262600_104263200	0.998743	0.00367043	0.0642928	-0.000358584	-3.77953	-2.03526	0.227141	1.27685	1.09049	NA	NA	NA	NA	NA	NA	NA
chr1_10426800_10427400	0.0129138	0.000242884	0.454501	-0.619092	-5.23262	-0.886617	0.245504	1.38549	1.18179	NA	NA	NA	NA	NA	NA	NA
chr1_1042800_1043400	0.438241	0.00083964	0.220612	-0.148321	-3.50219	-1.06718	0.190738	1.02376	0.866951	NA	NA	NA	NA	NA	NA	NA
chr1_10428600_10429200	0.499166	0.0191988	0.0245039	-0.162642	-3.22269	-2.63815	0.239976	1.35872	1.159	NA	NA	NA	NA	NA	NA	NA
chr1_10429800_10430400	0.555466	0.0102098	0.396478	-0.0998605	-2.25985	-0.630271	0.168924	0.866651	0.740796	NA	NA	NA	NA	NA	NA	NA
chr1_10430400_10431000	0.966074	0.0137732	0.487133	-0.00622048	-1.55751	0.378198	0.145966	0.623552	0.542681	0.018588	0.385724	-1.93571	0.826632	-2.34168	0.0296615	0.00320228
chr1_10431000_10431600	0.429883	3.83294e-05	0.737077	-0.149647	-4.23981	-0.283272	0.188968	0.993556	0.841911	NA	NA	NA	NA	NA	NA	NA
chr1_10432200_10432800	0.0711031	0.570324	6.98567e-05	0.421965	-0.736544	-4.5453	0.231842	1.29433	1.10532	NA	NA	NA	NA	NA	NA	NA
chr1_10433400_10434000	0.440017	0.0180183	0.274939	-0.20584	-3.34454	-1.30547	0.265739	1.39572	1.1906	NA	NA	NA	NA	NA	NA	NA
chr1_104337600_104338200	0.806544	0.0130426	0.0567803	0.0606347	-3.5232	-2.28671	0.247087	1.39918	1.18945	NA	NA	NA	NA	NA	NA	NA
chr1_1043400_1044000	0.676427	0.0030853	0.602967	-0.0683539	-2.51053	-0.373027	0.163405	0.832159	0.715378	NA	NA	NA	NA	NA	NA	NA
chr1_1044000_1044600	0.931925	0.000253375	0.167472	0.0120649	-3.17263	-1.00204	0.140957	0.842663	0.721772	NA	NA	NA	NA	NA	NA	NA
chr1_104407200_104407800	0.111068	0.00690197	0.332469	-0.380658	-3.16166	-0.95903	0.237233	1.15125	0.985781	NA	NA	NA	NA	NA	NA	NA
chr1_104407800_104408400	0.368236	0.00167104	0.163718	-0.226067	-4.64944	-1.71079	0.250352	1.44762	1.22132	NA	NA	NA	NA	NA	NA	NA
chr1_1044600_1045200	0.984294	4.64504e-05	0.00396539	-0.00256756	-4.10747	-2.41288	0.130168	0.973781	0.822251	NA	NA	NA	NA	NA	NA	NA
chr1_104465400_104466000	0.152996	0.0488358	0.22597	0.332777	-2.13996	-1.11217	0.231476	1.07584	0.914088	NA	NA	NA	NA	NA	NA	NA
chr1_104467200_104467800	0.232554	0.13486	0.887838	-0.365888	-1.97096	0.158566	0.305028	1.3098	1.12201	0.0608393	0.565628	-2.12953	1.72467	-1.23475	0.231235	0.016788
chr1_104467800_104468400	0.854517	0.00316209	0.042748	0.0396909	-2.62322	1.52658	0.216027	0.871823	0.745875	0.0106159	0.0749707	-4.1498	1.14735	-3.61687	0.00171961	0.000403072
chr1_10447800_10448400	0.450963	0.00446603	0.116745	-0.16647	-3.26589	-1.52542	0.220158	1.12817	0.965869	NA	NA	NA	NA	NA	NA	NA
chr1_10448400_10449000	0.94848	0.0131927	0.000174858	-0.0121413	-3.12446	-4.10224	0.187528	1.24292	1.0608	NA	NA	NA	NA	NA	NA	NA
chr1_10449000_10449600	0.832183	0.00126914	0.0179219	0.0431043	-4.02753	-2.50246	0.202999	1.22175	1.04341	NA	NA	NA	NA	NA	NA	NA
chr1_1045200_1045800	0.633142	0.00548182	0.000641536	0.0686167	-2.76965	-2.89788	0.14341	0.980193	0.827903	NA	NA	NA	NA	NA	NA	NA
chr1_104534400_104535000	0.0548511	0.407786	0.00485855	0.501822	-1.1386	-3.35391	0.258951	1.3709	1.17002	NA	NA	NA	NA	NA	NA	NA
chr1_10454400_10455000	0.993029	0.255391	0.012319	0.00236709	-1.71536	-3.15591	0.270376	1.5014	1.24292	NA	NA	NA	NA	NA	NA	NA
chr1_10455000_10455600	0.272414	0.178714	0.0199841	-0.298238	-2.03682	-2.95911	0.27056	1.50631	1.25581	NA	NA	NA	NA	NA	NA	NA
chr1_10457400_10458000	0.781666	0.00347767	0.233864	-0.0720319	-4.27527	-1.46422	0.259353	1.43572	1.22411	NA	NA	NA	NA	NA	NA	NA
chr1_1045800_1046400	0.285401	0.202463	0.0148912	0.183832	-1.15269	-1.89108	0.17136	0.899713	0.766045	NA	NA	NA	NA	NA	NA	NA
chr1_104586600_104587200	0.0181042	0.732641	0.145284	0.648471	-0.397736	-1.45937	0.270821	1.16173	0.995895	NA	NA	NA	NA	NA	NA	NA
chr1_104593800_104594400	0.594056	0.360384	0.00885463	0.15178	-1.43056	-3.42504	0.284065	1.55843	1.28828	NA	NA	NA	NA	NA	NA	NA
chr1_104599200_104599800	0.816515	0.068602	0.290616	-0.06507	-2.61703	-1.28975	0.279857	1.42492	1.21539	NA	NA	NA	NA	NA	NA	NA
chr1_10461000_10461600	0.477552	0.0071279	0.00687441	-0.15612	-3.6788	-3.15325	0.219161	1.34505	1.1476	NA	NA	NA	NA	NA	NA	NA
chr1_10461600_10462200	0.0661619	0.0014281	0.00495266	-0.366296	-4.13236	-3.09335	0.197649	1.26745	1.08157	NA	NA	NA	NA	NA	NA	NA
chr1_10462200_10462800	0.0861629	0.000852501	0.114209	-0.414599	-4.88594	-1.90691	0.239734	1.43014	1.19895	NA	NA	NA	NA	NA	NA	NA
chr1_1046400_1047000	0.559505	0.00100336	0.189461	-0.113729	-3.42661	-1.141	0.19437	1.0175	0.864894	NA	NA	NA	NA	NA	NA	NA
chr1_10464000_10464600	0.000646798	0.197088	0.0610786	0.964935	-1.87044	-2.29288	0.275863	1.44248	1.21338	NA	NA	NA	NA	NA	NA	NA
chr1_10466400_10467000	0.911807	0.251768	0.0392396	0.0278351	-1.36639	-2.11754	0.250812	1.18682	1.0165	NA	NA	NA	NA	NA	NA	NA
chr1_104664000_104664600	0.835883	0.0286913	0.28746	-0.0530705	-2.28861	0.936483	0.255653	1.03423	0.876704	0.0254535	0.259725	-3.2251	1.35582	-2.37871	0.0274502	0.00302065
chr1_1047000_1047600	0.734535	0.0357216	0.28979	-0.0531581	-1.62169	-0.701713	0.156419	0.763989	0.660116	NA	NA	NA	NA	NA	NA	NA
chr1_10471800_10472400	0.100809	0.00401048	0.369816	-0.341403	-3.01752	-0.784201	0.206542	1.02962	0.871325	NA	NA	NA	NA	NA	NA	NA
chr1_10472400_10473000	0.0155207	0.108036	0.528967	-0.653824	-1.88727	-0.630938	0.266536	1.16607	0.999402	NA	NA	NA	NA	NA	NA	NA
chr1_10474200_10474800	0.546465	0.0229215	0.590631	-0.166282	-3.06693	-0.613997	0.274988	1.3319	1.13853	NA	NA	NA	NA	NA	NA	NA
chr1_10474800_10475400	0.495671	0.0420161	0.860618	0.112728	-1.5153	-0.112332	0.16498	0.737696	0.638456	NA	NA	NA	NA	NA	NA	NA
chr1_10475400_10476000	0.0539862	0.088083	0.00564924	0.372986	-1.75095	-2.42779	0.19177	1.0187	0.862342	NA	NA	NA	NA	NA	NA	NA
chr1_1047600_1048200	0.405472	0.00937302	0.402466	0.158349	-2.15752	0.589641	0.189716	0.817766	0.701925	0.0159428	0.33503	-2.74716	1.0777	-2.54909	0.019114	0.00229633
chr1_104775600_104776200	0.0382323	0.0189031	0.719949	0.565954	-3.13006	-0.404107	0.270255	1.31634	1.12463	NA	NA	NA	NA	NA	NA	NA
chr1_104776200_104776800	0.904299	0.000872964	0.0798887	0.0286212	-4.91695	-2.14699	0.237575	1.4422	1.21611	NA	NA	NA	NA	NA	NA	NA
chr1_104787600_104788200	0.788197	0.0452901	0.0048934	-0.0580833	-2.39645	-2.90304	0.215747	1.18527	1.01359	NA	NA	NA	NA	NA	NA	NA
chr1_104788200_104788800	0.640937	0.01596	0.0234286	-0.0969757	-2.69395	-2.16325	0.207431	1.10295	0.94299	NA	NA	NA	NA	NA	NA	NA
chr1_10479000_10479600	0.219622	0.120141	0.696681	0.365108	-2.15001	-0.458453	0.295966	1.37408	1.17345	NA	NA	NA	NA	NA	NA	NA
chr1_1048200_1048800	0.163179	0.00202539	0.136471	-0.344682	-4.40481	-1.78602	0.245748	1.39765	1.19184	NA	NA	NA	NA	NA	NA	NA
chr1_10482000_10482600	0.577096	0.0816948	0.0231492	0.14679	-2.57327	-2.85916	0.26256	1.46638	1.24377	NA	NA	NA	NA	NA	NA	NA
chr1_104848800_104849400	0.348763	0.013639	0.300439	-0.235816	-2.5959	0.914679	0.250744	1.03776	0.879729	0.0185158	0.268551	-3.51058	1.36046	-2.58042	0.0178668	0.00217992
chr1_104849400_104850000	0.378955	0.0226766	0.361599	-0.223661	-2.41981	0.81365	0.253324	1.04894	0.888632	0.0229412	0.308895	-3.23346	1.37475	-2.35204	0.0290271	0.0031487
chr1_1048800_1049400	0.587468	0.00248284	0.0950045	-0.132507	-4.30607	-2.00238	0.243627	1.39493	1.19041	NA	NA	NA	NA	NA	NA	NA
chr1_10489800_10490400	0.604533	0.129098	0.0538084	0.146477	-2.39613	-2.54071	0.282128	1.56857	1.30532	NA	NA	NA	NA	NA	NA	NA
chr1_10490400_10491000	0.942525	0.0621233	0.0378415	0.0191792	-2.80707	-2.63536	0.265495	1.49154	1.25585	NA	NA	NA	NA	NA	NA	NA
chr1_104932200_104932800	0.0597461	0.000561493	0.197282	-0.413249	-4.1108	-1.28829	0.217541	1.16154	0.99396	NA	NA	NA	NA	NA	NA	NA
chr1_104932800_104933400	0.150023	0.0241885	0.0119609	-0.315519	-2.70671	-2.58701	0.21787	1.18643	1.01453	NA	NA	NA	NA	NA	NA	NA
chr1_104933400_104934000	0.307004	0.190889	0.00160116	0.248754	-1.80092	-3.76833	0.242533	1.36956	1.16846	NA	NA	NA	NA	NA	NA	NA
chr1_1049400_1050000	0.640623	0.00119173	0.0128186	-0.0997416	-4.52504	-2.93763	0.213147	1.36474	1.16367	NA	NA	NA	NA	NA	NA	NA
chr1_10495800_10496400	0.949846	0.000647749	0.0886473	0.0148468	-4.9766	-2.06857	0.235572	1.42292	1.20565	NA	NA	NA	NA	NA	NA	NA
chr1_10496400_10497000	0.450069	0.00123558	0.179111	-0.188197	-4.7603	-1.64922	0.2484	1.44047	1.22079	NA	NA	NA	NA	NA	NA	NA
chr1_10497600_10498200	0.0136124	0.807458	0.0683578	-0.782613	-0.361967	-2.29008	0.312773	1.48216	1.24579	NA	NA	NA	NA	NA	NA	NA
chr1_1050000_1050600	0.819644	3.43259e-05	0.211577	0.0417942	-3.78197	0.94271	0.182927	0.88047	0.750827	0.00294593	0.207127	-4.72468	1.15714	-4.08308	0.000579303	0.000200742
chr1_105004200_105004800	0.69912	0.189197	0.00114879	0.0983931	-1.99819	-4.16643	0.253994	1.51375	1.25238	NA	NA	NA	NA	NA	NA	NA
chr1_105004800_105005400	0.735478	0.0780237	0.00426276	0.0771079	-2.21957	-3.10571	0.227733	1.24933	1.0671	NA	NA	NA	NA	NA	NA	NA
chr1_105005400_105006000	0.570106	0.228163	0.000596585	-0.131445	-1.5841	-3.9331	0.230859	1.30815	1.11689	NA	NA	NA	NA	NA	NA	NA
chr1_10500600_10501200	0.318117	0.00156768	0.0142612	-0.220488	-4.63761	-2.99038	0.219989	1.43509	1.20346	NA	NA	NA	NA	NA	NA	NA
chr1_105017400_105018000	0.77939	0.846731	0.355958	0.0901317	-0.265699	-1.08618	0.321086	1.3718	1.17239	NA	NA	NA	NA	NA	NA	NA
chr1_105027000_105027600	0.0288119	0.390691	0.246292	0.604324	-1.0543	-1.22099	0.273306	1.22407	1.04826	NA	NA	NA	NA	NA	NA	NA
chr1_105027600_105028200	0.497921	0.00164837	0.666935	-0.173902	-4.30747	-0.493005	0.255846	1.33938	1.1429	NA	NA	NA	NA	NA	NA	NA
chr1_1050600_1051200	0.814357	1.10507e-06	0.605737	0.0415876	-4.91874	0.42035	0.176745	0.960831	0.81234	0.0016246	0.450617	-5.33909	1.25821	-4.2434	0.000398198	0.000163066
chr1_10508400_10509000	0.272475	0.000814903	0.133659	-0.264441	-4.83116	-1.81215	0.239931	1.40858	1.20052	NA	NA	NA	NA	NA	NA	NA
chr1_10510200_10510800	0.755198	0.0619477	0.773589	0.0882836	-2.478	-0.3241	0.282538	1.3158	1.12419	NA	NA	NA	NA	NA	NA	NA
chr1_10510800_10511400	0.247388	0.814987	0.328165	0.352873	-0.255206	0.9147	0.303662	1.08837	0.931853	0.28264	0.287025	-1.16991	1.4328	-0.816519	0.423823	0.0291742
chr1_105112200_105112800	0.40268	0.182595	0.260281	0.262232	-1.60876	1.16441	0.312311	1.20045	1.02975	0.0760407	0.2413	-2.77317	1.58161	-1.75339	0.0948499	0.00796531
chr1_1051200_1051800	0.987104	0.0115041	0.148769	-0.0030984	-2.5382	-1.21633	0.191316	0.989858	0.837287	NA	NA	NA	NA	NA	NA	NA
chr1_105120600_105121200	0.0039152	0.00577761	0.18462	-0.795412	-4.3471	-1.70817	0.270668	1.5483	1.28058	NA	NA	NA	NA	NA	NA	NA
chr1_105138000_105138600	0.0371316	0.217856	0.110116	-0.452464	-1.26214	-1.38735	0.2148	1.01918	0.86229	NA	NA	NA	NA	NA	NA	NA
chr1_105138600_105139200	0.128698	0.406094	0.21378	-0.357538	-0.862162	-1.09397	0.233807	1.03432	0.875534	NA	NA	NA	NA	NA	NA	NA
chr1_10516800_10517400	0.0425323	0.0961391	0.10649	0.566355	-2.40717	-1.99136	0.276423	1.43601	1.22493	NA	NA	NA	NA	NA	NA	NA
chr1_1051800_1052400	0.301189	0.0491856	0.201638	-0.185703	-1.78441	-0.983428	0.178886	0.8985	0.766186	NA	NA	NA	NA	NA	NA	NA
chr1_10518600_10519200	0.0732145	0.0383062	0.0904004	0.480115	-2.95067	-2.05274	0.26578	1.40955	1.20306	NA	NA	NA	NA	NA	NA	NA
chr1_10519200_10519800	0.176852	0.0129988	0.0550707	0.332071	-3.38347	-2.21856	0.24452	1.34303	1.14587	NA	NA	NA	NA	NA	NA	NA
chr1_105265200_105265800	0.289152	0.049306	0.045079	0.269148	-2.6567	-2.31372	0.252857	1.33844	1.14321	NA	NA	NA	NA	NA	NA	NA
chr1_10528200_10528800	0.172182	0.0852589	0.362373	-0.392012	-2.01635	0.911305	0.285523	1.16252	0.996898	0.0449099	0.309407	-2.92766	1.53143	-1.91172	0.070347	0.00626204
chr1_10528800_10529400	0.443806	0.0110033	0.778833	-0.214718	-3.6802	-0.341284	0.279516	1.4262	1.21265	NA	NA	NA	NA	NA	NA	NA
chr1_1053000_1053600	0.650339	0.00104966	0.00304222	0.100026	-5.0497	-3.75594	0.220143	1.50553	1.24309	NA	NA	NA	NA	NA	NA	NA
chr1_10530000_10530600	0.110349	0.118863	0.155341	0.448341	-2.22139	-1.72171	0.278846	1.41475	1.20449	NA	NA	NA	NA	NA	NA	NA
chr1_105301200_105301800	0.939817	0.00892569	0.316129	-0.0207513	-4.06641	-1.29331	0.274308	1.53116	1.28507	NA	NA	NA	NA	NA	NA	NA
chr1_10530600_10531200	0.125767	0.183739	0.0568241	0.403998	-1.76024	-2.16149	0.262141	1.31695	1.12452	NA	NA	NA	NA	NA	NA	NA
chr1_1053600_1054200	0.47417	0.0246733	4.50364e-12	-0.138327	0.993635	2.95577	0.192697	0.437051	0.386696	0.0237881	0.00407251	-1.96214	0.583565	-3.36233	0.00309898	0.000607508
chr1_10536000_10536600	0.658799	0.000155058	0.432371	-0.103273	-5.02169	-0.865685	0.233326	1.28767	1.09908	NA	NA	NA	NA	NA	NA	NA
chr1_10536600_10537200	0.74476	0.103707	0.591161	-0.0939466	-2.19963	-0.618157	0.287945	1.34214	1.14788	NA	NA	NA	NA	NA	NA	NA
chr1_105378600_105379200	0.320584	0.263812	0.688599	0.361736	-1.73278	-0.513675	0.362769	1.54383	1.27884	NA	NA	NA	NA	NA	NA	NA
chr1_105384000_105384600	0.0584939	0.0209951	1.06618e-05	-0.445308	1.35759	2.34084	0.233247	0.58088	0.510408	0.0221942	0.00816133	-0.983244	0.773264	-1.27155	0.218122	0.0159529
chr1_10540800_10541400	0.010957	0.0963539	0.1138	-0.684584	-2.2506	-1.82673	0.265141	1.34348	1.14723	NA	NA	NA	NA	NA	NA	NA
chr1_10541400_10542000	0.0888556	0.0201322	0.0292436	-0.428483	-3.36412	-2.67786	0.249903	1.42943	1.21438	NA	NA	NA	NA	NA	NA	NA
chr1_1054200_1054800	0.76825	0.784216	0.0011699	-0.0482793	0.13546	1.43969	0.163495	0.493643	0.433472	0.273273	0.0159771	-1.30423	0.656949	-1.98529	0.0609972	0.00558939
chr1_105436800_105437400	0.71818	0.0319494	0.105087	-0.0729487	-2.23528	-1.42266	0.201685	1.0306	0.87156	NA	NA	NA	NA	NA	NA	NA
chr1_105437400_105438000	0.496061	0.154487	0.18886	-0.145175	-1.43852	-1.12292	0.212659	1.00428	0.850027	NA	NA	NA	NA	NA	NA	NA
chr1_10546800_10547400	0.0189899	0.0465202	0.0193774	-0.619	-3.0551	-2.99081	0.260512	1.51976	1.26286	NA	NA	NA	NA	NA	NA	NA
chr1_105470400_105471000	0.625918	0.013637	0.828302	0.140166	-3.60877	-0.267486	0.286832	1.44264	1.2308	NA	NA	NA	NA	NA	NA	NA
chr1_1054800_1055400	0.0864856	0.00250568	0.00811541	-0.30597	-3.19788	-2.37377	0.177106	1.03692	0.882597	NA	NA	NA	NA	NA	NA	NA
chr1_1055400_1056000	0.00635719	0.000170172	0.122212	-0.599859	-4.89294	-1.67729	0.216182	1.26285	1.078	NA	NA	NA	NA	NA	NA	NA
chr1_10554000_10554600	0.681337	0.00697413	0.0354574	-0.104748	-4.32333	-2.7756	0.254499	1.57632	1.3057	NA	NA	NA	NA	NA	NA	NA
chr1_105541200_105541800	0.529442	0.26572	0.0176223	-0.165348	-1.53069	-2.81056	0.262212	1.36926	1.16873	NA	NA	NA	NA	NA	NA	NA
chr1_10555200_10555800	0.000653026	0.00404878	0.0224575	0.852951	-4.33791	-2.86474	0.244044	1.48174	1.23975	NA	NA	NA	NA	NA	NA	NA
chr1_10555800_10556400	0.0265488	1.50328e-05	0.868663	0.450787	-4.63697	-0.145446	0.200868	1.02997	0.877816	NA	NA	NA	NA	NA	NA	NA
chr1_105597000_105597600	0.569789	0.0525989	0.168607	0.152444	-2.75288	-1.65375	0.267518	1.40705	1.19441	NA	NA	NA	NA	NA	NA	NA
chr1_1056000_1056600	0.568729	0.00655669	0.0125116	0.124668	-3.5225	-2.75694	0.218176	1.27437	1.08824	NA	NA	NA	NA	NA	NA	NA
chr1_105630600_105631200	0.975151	0.0387628	0.0153977	0.00784148	-2.99141	-2.99946	0.251248	1.43244	1.22126	NA	NA	NA	NA	NA	NA	NA
chr1_105631200_105631800	0.472245	0.0499676	0.140923	0.170268	-2.16939	-1.38831	0.236161	1.09616	0.937043	NA	NA	NA	NA	NA	NA	NA
chr1_105631800_105632400	0.713636	0.538684	0.105182	-0.107783	0.749702	-1.70136	0.29305	1.21611	1.04259	0.194271	0.128015	2.45107	1.60185	1.53015	0.141645	0.0110569
chr1_105632400_105633000	0.717565	0.346018	8.17823e-06	-0.12178	0.869999	3.71402	0.335926	0.919805	0.798626	0.129379	0.0080037	-2.84402	1.21813	-2.33474	0.030094	0.00323783
chr1_1056600_1057200	0.299895	0.000718085	0.0013141	-0.194515	-4.74725	-3.83182	0.186871	1.36919	1.16615	NA	NA	NA	NA	NA	NA	NA
chr1_105664200_105664800	0.924895	0.570887	0.114707	-0.02836	-0.620049	1.47249	0.300243	1.09121	0.927101	0.205027	0.13536	-2.09254	1.43187	-1.4614	0.159439	0.0122066
chr1_105687000_105687600	0.725425	0.0110702	0.394525	0.072394	-2.57843	-0.722719	0.205668	1.00008	0.84594	NA	NA	NA	NA	NA	NA	NA
chr1_105712200_105712800	0.000626201	0.00448378	0.917506	-0.980513	-4.16924	-0.127208	0.27956	1.44089	1.22573	NA	NA	NA	NA	NA	NA	NA
chr1_105712800_105713400	0.68235	0.191924	0.342314	0.121161	-1.86146	-1.15428	0.29537	1.41893	1.211	NA	NA	NA	NA	NA	NA	NA
chr1_10571400_10572000	0.193331	0.063034	0.179746	-0.345903	-2.49252	-1.53135	0.26451	1.32908	1.1352	NA	NA	NA	NA	NA	NA	NA
chr1_1057200_1057800	0.429065	0.00463912	0.010485	-0.170853	-3.83157	-2.94657	0.215362	1.32944	1.13419	NA	NA	NA	NA	NA	NA	NA
chr1_1057800_1058400	0.956716	0.000738032	0.000407225	0.0124225	-2.94495	2.64985	0.22843	0.851359	0.72969	0.00659184	0.0121711	-5.5948	1.12128	-4.98967	7.03819e-05	7.70304e-05
chr1_105795600_105796200	0.82421	0.0364278	0.0720671	-0.0507112	-2.36224	-1.73479	0.227821	1.11718	0.95644	NA	NA	NA	NA	NA	NA	NA
chr1_105796200_105796800	0.889067	0.000423495	0.0936684	0.02926	-4.43732	-1.76947	0.209352	1.22568	1.04763	NA	NA	NA	NA	NA	NA	NA
chr1_1058400_1059000	0.69317	0.000385044	0.00502609	0.0775336	-2.84251	1.92646	0.196062	0.779322	0.674748	0.00537502	0.0267751	-4.76897	1.03084	-4.6263	0.000163065	0.000109589
chr1_105850200_105850800	0.774543	0.0338674	0.925766	-0.0877518	-3.08521	0.114637	0.305705	1.43844	1.22794	0.0274839	0.57577	-3.19985	1.89128	-1.6919	0.106188	0.00872943
chr1_105873600_105874200	0.595165	0.0246387	0.590667	-0.158137	-3.43734	-0.685504	0.296855	1.51155	1.27125	NA	NA	NA	NA	NA	NA	NA
chr1_1059000_1059600	0.922838	0.000399283	0.0180376	-0.018855	-4.51774	-2.54049	0.194278	1.24213	1.06036	NA	NA	NA	NA	NA	NA	NA
chr1_105909000_105909600	0.00583069	0.0293652	0.942572	-0.770507	-2.6996	0.0757633	0.274737	1.22518	1.04965	0.0257219	0.580305	-2.77537	1.61333	-1.72027	0.100819	0.00836687
chr1_105909600_105910200	0.12355	0.0464385	0.251356	-0.407121	-2.62893	-1.28695	0.262604	1.30726	1.11684	NA	NA	NA	NA	NA	NA	NA
chr1_105913800_105914400	0.671821	0.130795	0.000677097	-0.0794961	-1.61418	-3.14014	0.187211	1.06141	0.901183	NA	NA	NA	NA	NA	NA	NA
chr1_105914400_105915000	0.562624	0.138489	0.000399853	-0.105819	-1.5522	-3.2128	0.182298	1.04118	0.883444	NA	NA	NA	NA	NA	NA	NA
chr1_10594200_10594800	0.950502	0.00154995	0.0191564	0.0139333	-4.53326	-2.82662	0.224012	1.40127	1.1913	NA	NA	NA	NA	NA	NA	NA
chr1_105957600_105958200	0.0132883	0.0369334	0.0528499	0.614773	-2.70422	-2.14291	0.24482	1.28242	1.09646	NA	NA	NA	NA	NA	NA	NA
chr1_105958200_105958800	0.00511409	0.0306801	0.0404399	0.68151	-2.77919	-2.25088	0.239193	1.27162	1.08718	NA	NA	NA	NA	NA	NA	NA
chr1_1059600_1060200	0.867095	0.515233	0.419605	0.031629	-0.522238	-0.558341	0.188617	0.800319	0.689535	NA	NA	NA	NA	NA	NA	NA
chr1_105976800_105977400	0.0126371	0.0821851	0.62225	0.702863	-2.17704	-0.525794	0.277843	1.24261	1.06464	NA	NA	NA	NA	NA	NA	NA
chr1_10599600_10600200	0.931843	0.0138675	3.63105e-09	0.0303076	2.04597	4.54483	0.353663	0.819942	0.716629	0.0186502	0.00452011	-2.49885	1.08897	-2.29469	0.0327054	0.00345357
chr1_10600200_10600800	0.595598	0.0242701	0.00860526	0.133445	-3.43564	-3.32275	0.250798	1.50683	1.24505	NA	NA	NA	NA	NA	NA	NA
chr1_1060200_1060800	0.669982	8.08465e-05	0.020387	-0.0869923	-5.57757	-2.73955	0.203651	1.36912	1.16647	NA	NA	NA	NA	NA	NA	NA
chr1_10602600_10603200	0.681265	0.0864696	0.47019	0.140201	-2.97053	-1.03138	0.340556	1.71935	1.4239	NA	NA	NA	NA	NA	NA	NA
chr1_10603800_10604400	0.760792	0.0038032	0.00685223	-0.0693782	-4.20577	-3.30697	0.227398	1.4265	1.20306	NA	NA	NA	NA	NA	NA	NA
chr1_106042800_106043400	0.876847	0.403366	0.00689191	0.0438481	-1.32092	-3.59117	0.282382	1.57548	1.3074	NA	NA	NA	NA	NA	NA	NA
chr1_10605000_10605600	0.000634598	0.00333238	0.126286	-0.862013	-4.13701	-1.81541	0.246047	1.3828	1.17959	NA	NA	NA	NA	NA	NA	NA
chr1_1060800_1061400	0.424536	0.00069334	0.155618	-0.18724	-4.5707	-1.60188	0.233712	1.31436	1.12142	NA	NA	NA	NA	NA	NA	NA
chr1_106080600_106081200	0.722323	0.0121738	0.0349639	-0.0786484	-2.98297	-2.13937	0.220833	1.1728	1.00365	NA	NA	NA	NA	NA	NA	NA
chr1_106120200_106120800	0.749324	0.010917	0.200493	0.0860308	-3.75876	-1.59673	0.268658	1.45503	1.24083	NA	NA	NA	NA	NA	NA	NA
chr1_106120800_106121400	0.641796	0.000303522	0.274312	0.108102	-4.75057	-1.19878	0.231827	1.2789	1.09186	NA	NA	NA	NA	NA	NA	NA
chr1_10612800_10613400	0.677003	0.125557	0.000662685	0.083594	-1.72102	-3.33161	0.200216	1.11609	0.954406	NA	NA	NA	NA	NA	NA	NA
chr1_10613400_10614000	0.223801	0.270828	9.85728e-05	0.21796	-1.14559	-3.53375	0.178298	1.03583	0.878733	NA	NA	NA	NA	NA	NA	NA
chr1_1061400_1062000	0.73036	0.00323553	0.124977	-0.0744683	-3.32629	-1.46387	0.215597	1.10825	0.947854	NA	NA	NA	NA	NA	NA	NA
chr1_106150200_106150800	0.293756	0.42883	0.0255381	-0.298029	-1.16642	-2.8321	0.282686	1.46954	1.25328	NA	NA	NA	NA	NA	NA	NA
chr1_10615200_10615800	0.618506	0.00268651	0.19099	-0.124726	-4.42196	-1.59049	0.249855	1.4443	1.20981	NA	NA	NA	NA	NA	NA	NA
chr1_10615800_10616400	0.424963	0.271783	0.0140471	-0.161815	-1.11554	-2.1286	0.202164	1.01068	0.8547	NA	NA	NA	NA	NA	NA	NA
chr1_106161000_106161600	0.80883	0.571261	0.000766679	-0.0925277	0.621254	3.21509	0.381652	1.0944	0.932486	0.205134	0.0141124	-2.59384	1.43779	-1.80405	0.0863075	0.00737462
chr1_106161600_106162200	0.0594626	8.94391e-06	1.00394e-07	0.659752	3.54255	3.78708	0.346913	0.765316	0.67034	0.00228316	0.00561768	-0.244529	1.01738	-0.240351	0.812504	0.0546295
chr1_10616400_10617000	0.4927	0.0120591	0.817105	0.108494	-1.88883	-0.148913	0.157693	0.741607	0.64256	NA	NA	NA	NA	NA	NA	NA
chr1_10618200_10618800	0.240092	0.0748767	0.00979244	-0.257894	-2.04222	-2.55134	0.218502	1.13712	0.972831	NA	NA	NA	NA	NA	NA	NA
chr1_10618800_10619400	0.497061	0.0515498	0.206278	-0.153955	-2.07788	-1.14001	0.226046	1.05724	0.897399	NA	NA	NA	NA	NA	NA	NA
chr1_106192800_106193400	0.0257177	0.0348281	0.0503662	-0.594658	-3.18376	-2.46513	0.263479	1.49247	1.24779	NA	NA	NA	NA	NA	NA	NA
chr1_10619400_10620000	0.523912	0.0127579	0.246733	-0.163588	-3.41509	-1.3422	0.255969	1.35187	1.15341	NA	NA	NA	NA	NA	NA	NA
chr1_1062000_1062600	0.454822	0.011845	0.289574	-0.191963	-3.32496	-1.18281	0.256055	1.30211	1.11219	NA	NA	NA	NA	NA	NA	NA
chr1_10622400_10623000	0.272216	0.216237	0.0224579	-0.274795	-1.51365	-2.40834	0.24919	1.21796	1.04224	NA	NA	NA	NA	NA	NA	NA
chr1_10623000_10623600	0.447816	0.296222	0.00640931	0.178871	-1.20845	-2.73491	0.234918	1.15214	0.986629	NA	NA	NA	NA	NA	NA	NA
chr1_10623600_10624200	0.0896996	0.280346	0.00256983	0.35412	-1.11563	-2.69347	0.207084	1.02903	0.875663	NA	NA	NA	NA	NA	NA	NA
chr1_10624200_10624800	0.826786	0.215197	0.0127669	0.0451707	-1.23101	-2.11625	0.205998	0.988274	0.837806	NA	NA	NA	NA	NA	NA	NA
chr1_10624800_10625400	0.479983	0.00662861	0.000549618	0.13143	-3.34161	-3.66496	0.185527	1.21059	1.03375	NA	NA	NA	NA	NA	NA	NA
chr1_10625400_10626000	0.860383	0.0665917	0.0239927	-0.0351699	-1.91429	-2.00305	0.199552	1.03458	0.876758	NA	NA	NA	NA	NA	NA	NA
chr1_1062600_1063200	0.253384	0.0114788	0.329818	-0.224467	-2.5373	-0.818436	0.195636	0.989195	0.836649	NA	NA	NA	NA	NA	NA	NA
chr1_10626000_10626600	0.543463	0.148043	0.0131351	0.137481	-1.6173	-2.39177	0.225666	1.11129	0.95084	NA	NA	NA	NA	NA	NA	NA
chr1_10626600_10627200	0.891404	0.00929566	0.703752	0.0279276	-2.64218	-0.322913	0.204147	1.00034	0.84728	NA	NA	NA	NA	NA	NA	NA
chr1_10627800_10628400	0.983982	0.0169922	0.0540519	-0.00481434	-3.09439	-2.12504	0.239318	1.27936	1.09289	NA	NA	NA	NA	NA	NA	NA
chr1_10629600_10630200	0.618976	1.78308e-05	0.173342	0.0939268	-4.91066	-1.28973	0.18841	1.10109	0.941939	NA	NA	NA	NA	NA	NA	NA
chr1_10630200_10630800	0.376739	0.00479301	0.0219655	0.16879	-3.01161	-2.07547	0.190287	1.04893	0.894815	NA	NA	NA	NA	NA	NA	NA
chr1_10630800_10631400	0.145842	0.147869	0.659005	-0.26169	-1.15311	-0.302578	0.17883	0.791993	0.68406	NA	NA	NA	NA	NA	NA	NA
chr1_10631400_10632000	0.474518	0.151815	0.8914	-0.12579	-1.082	-0.0889785	0.175371	0.750443	0.650398	NA	NA	NA	NA	NA	NA	NA
chr1_1063200_1063800	0.450005	0.707862	0.00212663	-0.142224	-0.368015	-2.60454	0.187693	0.979884	0.830478	NA	NA	NA	NA	NA	NA	NA
chr1_10632000_10632600	0.57121	0.00380382	0.271882	-0.114965	-3.03905	-0.962863	0.202494	1.03079	0.872532	NA	NA	NA	NA	NA	NA	NA
chr1_10632600_10633200	0.843777	0.0313908	0.0404898	0.0454687	-2.56264	-2.08635	0.230259	1.17759	1.00797	NA	NA	NA	NA	NA	NA	NA
chr1_10633200_10633800	0.679201	0.000236441	0.0450926	-0.0908478	-5.3772	-2.41985	0.21917	1.42096	1.19573	NA	NA	NA	NA	NA	NA	NA
chr1_10633800_10634400	0.32395	0.00220908	0.440965	-0.17824	-2.96635	-0.6214	0.180002	0.94949	0.803895	NA	NA	NA	NA	NA	NA	NA
chr1_10634400_10635000	0.690342	0.062274	0.113356	-0.0552101	-1.28767	-0.946364	0.138267	0.684608	0.5936	NA	NA	NA	NA	NA	NA	NA
chr1_10635000_10635600	0.824441	0.157504	0.00290821	0.0392166	-1.4098	-2.54443	0.176417	0.991489	0.838067	NA	NA	NA	NA	NA	NA	NA
chr1_10635600_10636200	0.918713	0.311094	0.063555	0.0172781	-0.828608	-1.30824	0.168965	0.814773	0.698982	NA	NA	NA	NA	NA	NA	NA
chr1_10636200_10636800	0.0916365	0.0698678	0.000695557	0.349903	-2.19082	-3.56373	0.205864	1.19837	1.02507	NA	NA	NA	NA	NA	NA	NA
chr1_10636800_10637400	0.176873	0.0392687	0.0119247	0.311463	-2.58295	-2.70454	0.229357	1.2401	1.06016	NA	NA	NA	NA	NA	NA	NA
chr1_10637400_10638000	0.784455	0.00962817	0.00529794	-0.0565833	-3.17386	-2.92741	0.206435	1.2074	1.03178	NA	NA	NA	NA	NA	NA	NA
chr1_1063800_1064400	0.691521	0.136952	9.18689e-50	-0.0558952	-0.336177	4.97888	0.140547	0.224613	0.204241	0.0614859	0.000523032	-5.31505	0.303588	-17.5075	1.34823e-13	0
chr1_10638000_10638600	0.656645	0.00598715	0.00325635	-0.0958885	-3.81242	-3.48514	0.21519	1.3638	1.16198	NA	NA	NA	NA	NA	NA	NA
chr1_106383000_106383600	0.000826451	0.120048	0.519323	1.01016	-2.15915	-0.759948	0.294883	1.37958	1.17605	NA	NA	NA	NA	NA	NA	NA
chr1_10638600_10639200	0.889072	0.000742933	0.198145	0.0306468	-3.99437	-1.2786	0.219285	1.15539	0.988399	NA	NA	NA	NA	NA	NA	NA
chr1_10639200_10639800	0.827158	4.70889e-05	0.104661	0.0304361	-2.64772	0.893768	0.139105	0.628233	0.546868	0.00320784	0.127576	-3.54148	0.832911	-4.25194	0.000390333	0.000161983
chr1_10639800_10640400	0.758332	0.00141613	0.229643	0.0331845	-1.4778	0.479558	0.107625	0.452904	0.397288	0.00807441	0.219843	-1.95736	0.602462	-3.24894	0.00402039	0.000725885
chr1_10640400_10641000	0.873957	0.0705616	0.00491083	0.0282034	-1.81363	-2.40655	0.177431	0.994537	0.840592	NA	NA	NA	NA	NA	NA	NA
chr1_10641000_10641600	0.658861	0.0109209	0.013548	-0.0844909	-2.77593	-2.285	0.190929	1.07462	0.912564	NA	NA	NA	NA	NA	NA	NA
chr1_106411800_106412400	0.552945	0.061596	0.0148537	0.125054	-2.01686	-2.25225	0.210199	1.06947	0.912	NA	NA	NA	NA	NA	NA	NA
chr1_10641600_10642200	0.546254	0.00139978	0.0116647	0.1056	-3.45998	-2.30515	0.174544	1.05923	0.900752	NA	NA	NA	NA	NA	NA	NA
chr1_10642200_10642800	0.611638	0.102119	0.00319204	0.107889	-1.82984	-2.85865	0.211964	1.11132	0.95104	NA	NA	NA	NA	NA	NA	NA
chr1_10642800_10643400	0.837436	0.024071	0.0265603	-0.0289316	-1.82577	-1.54564	0.140721	0.799611	0.688779	NA	NA	NA	NA	NA	NA	NA
chr1_10643400_10644000	0.649307	0.00376127	0.0300598	-0.0848431	-3.21584	-2.02959	0.186138	1.08939	0.925106	NA	NA	NA	NA	NA	NA	NA
chr1_106439400_106440000	0.459189	0.0870795	0.855457	-0.248172	-2.54131	0.226098	0.334264	1.4738	1.23869	0.0454996	0.555939	-2.76741	1.92521	-1.43746	0.16605	0.0126289
chr1_1064400_1065000	0.944121	0.153632	1.37094e-43	-0.013855	-0.439439	5.88392	0.19728	0.306146	0.277384	0.0667392	0.000842519	-6.32336	0.413119	-15.3064	1.65655e-12	0
chr1_10644000_10644600	0.397398	0.0191464	0.107442	-0.195298	-2.69234	-1.57518	0.229995	1.13461	0.971589	NA	NA	NA	NA	NA	NA	NA
chr1_10644600_10645200	0.233855	0.0455917	0.0986592	-0.280381	-2.27539	-1.60561	0.234398	1.127	0.965151	NA	NA	NA	NA	NA	NA	NA
chr1_10645200_10645800	0.678744	0.0918096	0.00101512	-0.0987233	-2.43171	-4.10473	0.237811	1.43146	1.22013	NA	NA	NA	NA	NA	NA	NA
chr1_106461000_106461600	0.126793	0.00997542	0.0593302	-0.505156	-3.48939	2.1764	0.328677	1.3339	1.1438	0.016318	0.0902598	-5.66579	1.75714	-3.22443	0.00425222	0.000757345
chr1_10646400_10647000	0.889255	0.00143463	0.00827616	0.0298721	-4.43382	-3.11004	0.214096	1.3605	1.15934	NA	NA	NA	NA	NA	NA	NA
chr1_10647000_10647600	0.937422	0.000110095	0.446252	-0.016891	-4.48513	-0.734822	0.214719	1.12354	0.961744	NA	NA	NA	NA	NA	NA	NA
chr1_10647600_10648200	0.641728	0.00100183	0.679255	-0.0879745	-3.19163	-0.332265	0.188625	0.947595	0.801734	NA	NA	NA	NA	NA	NA	NA
chr1_10648200_10648800	0.0348152	0.0247043	0.150598	-0.479065	-2.42278	-1.31773	0.224558	1.0659	0.911202	NA	NA	NA	NA	NA	NA	NA
chr1_10648800_10649400	0.678946	0.0534185	0.00127891	-0.0843388	-2.24492	-3.24516	0.203296	1.15145	0.98512	NA	NA	NA	NA	NA	NA	NA
chr1_10649400_10650000	0.397761	0.0102973	0.125114	-0.196663	-3.0524	-1.54874	0.231781	1.17198	1.00318	NA	NA	NA	NA	NA	NA	NA
chr1_10650600_10651200	0.0113219	0.0734786	0.456643	0.735426	-2.48478	-0.878688	0.286154	1.37679	1.17681	NA	NA	NA	NA	NA	NA	NA
chr1_10651200_10651800	0.773276	0.142511	0.0184062	0.0653624	-1.62736	-2.25289	0.226397	1.10281	0.943378	NA	NA	NA	NA	NA	NA	NA
chr1_10651800_10652400	0.188995	0.10973	0.0403402	0.233765	-1.49327	-1.63102	0.177009	0.927108	0.787386	NA	NA	NA	NA	NA	NA	NA
chr1_10652400_10653000	0.431203	0.0846367	0.000885386	0.175209	-2.26082	-3.78164	0.221882	1.30084	1.11057	NA	NA	NA	NA	NA	NA	NA
chr1_10653000_10653600	0.88431	0.607125	0.163743	0.0262615	-0.409965	-0.959347	0.18012	0.795333	0.68491	NA	NA	NA	NA	NA	NA	NA
chr1_10653600_10654200	0.699964	0.212083	0.234707	0.0631848	-0.939163	-0.77339	0.163589	0.748836	0.647739	NA	NA	NA	NA	NA	NA	NA
chr1_10654200_10654800	0.133437	1.89782e-06	0.336091	0.25587	-5.02639	-0.825807	0.169412	1.00623	0.85525	NA	NA	NA	NA	NA	NA	NA
chr1_10654800_10655400	0.656884	0.074679	0.0804604	-0.0800825	-1.65626	-1.37892	0.179853	0.921584	0.782558	NA	NA	NA	NA	NA	NA	NA
chr1_10655400_10656000	0.440722	0.0117566	9.81329e-05	-0.139959	-3.13134	-4.20628	0.180966	1.22497	1.04566	NA	NA	NA	NA	NA	NA	NA
chr1_1065600_1066200	0.776733	0.00596178	0.10587	-0.0555728	-2.85987	-1.41127	0.195553	1.02251	0.866543	NA	NA	NA	NA	NA	NA	NA
chr1_10656600_10657200	0.37292	0.00507565	0.0417427	-0.20281	-3.5728	-2.20045	0.226813	1.25284	1.0698	NA	NA	NA	NA	NA	NA	NA
chr1_10657800_10658400	0.7433	0.00485113	0.0203739	0.0712087	-3.5206	-2.46403	0.216967	1.22795	1.04904	NA	NA	NA	NA	NA	NA	NA
chr1_10658400_10659000	0.339875	0.0817538	0.0292322	0.138559	-1.32196	-1.43462	0.144632	0.753467	0.65054	NA	NA	NA	NA	NA	NA	NA
chr1_10659000_10659600	0.736245	0.108911	0.00345992	0.0474442	-1.28918	-2.04607	0.140547	0.798529	0.686724	NA	NA	NA	NA	NA	NA	NA
chr1_10659600_10660200	0.810178	0.0261248	0.000240291	-0.0436308	-2.49806	-3.58548	0.181269	1.10992	0.948611	NA	NA	NA	NA	NA	NA	NA
chr1_10660200_10660800	0.515725	0.0156131	0.00184017	-0.140961	-3.20628	-3.55037	0.216274	1.30826	1.11587	NA	NA	NA	NA	NA	NA	NA
chr1_10660800_10661400	0.998569	0.0274181	0.00159591	0.000346874	-2.48725	-3.07696	0.192978	1.11474	0.95378	NA	NA	NA	NA	NA	NA	NA
chr1_10661400_10662000	0.488365	0.0481292	0.000974137	0.163873	-2.93924	-4.12161	0.235811	1.47296	1.22065	NA	NA	NA	NA	NA	NA	NA
chr1_106618800_106619400	0.671716	0.020332	0.000213281	-0.0830587	-2.95892	-4.0969	0.195534	1.25931	1.07455	NA	NA	NA	NA	NA	NA	NA
chr1_106619400_106620000	0.39252	0.041012	0.00247287	-0.147298	-2.08786	-2.63933	0.171681	1.01136	0.854641	NA	NA	NA	NA	NA	NA	NA
chr1_1066200_1066800	0.93233	0.0227019	0.000748359	0.0152943	-2.50235	-3.18599	0.179758	1.08492	0.922136	NA	NA	NA	NA	NA	NA	NA
chr1_10662000_10662600	0.260229	0.0862038	0.232097	0.323429	-2.5599	-1.50158	0.285995	1.48041	1.25058	NA	NA	NA	NA	NA	NA	NA
chr1_10662600_10663200	0.987756	0.0151455	0.00104813	0.00322661	-3.31375	-3.84999	0.209847	1.34582	1.14769	NA	NA	NA	NA	NA	NA	NA
chr1_106627800_106628400	0.310315	0.00534755	0.189482	-0.262888	-4.12319	-1.5998	0.258081	1.45487	1.21273	NA	NA	NA	NA	NA	NA	NA
chr1_10663200_10663800	0.406225	0.00231076	0.00180796	0.156423	-3.82913	-3.35016	0.187709	1.23129	1.05112	NA	NA	NA	NA	NA	NA	NA
chr1_10663800_10664400	0.401477	0.137024	0.00786982	0.182121	-1.64161	-2.53273	0.216345	1.09703	0.937921	NA	NA	NA	NA	NA	NA	NA
chr1_10664400_10665000	0.725391	0.00193264	0.439448	0.0548541	-2.60215	-0.547638	0.155818	0.821816	0.706118	NA	NA	NA	NA	NA	NA	NA
chr1_10665000_10665600	0.562478	0.00198596	0.0328882	-0.0859394	-2.86806	-1.66425	0.147995	0.90825	0.771563	NA	NA	NA	NA	NA	NA	NA
chr1_10665600_10666200	0.832928	0.0157945	0.00395861	-0.0341304	-2.43899	-2.47414	0.161464	0.996955	0.842963	NA	NA	NA	NA	NA	NA	NA
chr1_106659000_106659600	0.0785267	0.176733	0.000410557	0.442263	-2.06911	-4.57354	0.249362	1.52317	1.26022	NA	NA	NA	NA	NA	NA	NA
chr1_10666200_10666800	0.341336	0.000600838	0.14552	-0.121296	-2.56263	-0.922951	0.126997	0.728145	0.630207	NA	NA	NA	NA	NA	NA	NA
chr1_10666800_10667400	0.843103	0.00534594	0.0219257	0.0263543	-2.23371	-1.57352	0.13288	0.78814	0.678194	NA	NA	NA	NA	NA	NA	NA
chr1_10667400_10668000	0.466288	0.11141	0.00955208	0.17417	-2.00998	-2.821	0.23835	1.25386	1.072	NA	NA	NA	NA	NA	NA	NA
chr1_1066800_1067400	0.563715	0.00339016	0.00519428	0.0936712	-3.02704	-2.43523	0.161823	1.0137	0.856289	NA	NA	NA	NA	NA	NA	NA
chr1_10668000_10668600	0.703431	0.0656413	0.670053	-0.0722363	-1.598	-0.314769	0.189323	0.860579	0.737049	NA	NA	NA	NA	NA	NA	NA
chr1_10668600_10669200	0.721413	0.0127636	0.0947158	-0.0696401	-2.53366	-1.42909	0.194873	1.00302	0.848838	NA	NA	NA	NA	NA	NA	NA
chr1_10669800_10670400	0.761044	0.0663704	0.0260826	0.0758713	-2.49553	-2.58957	0.248951	1.34761	1.15025	NA	NA	NA	NA	NA	NA	NA
chr1_10670400_10671000	0.781699	0.04632	0.000474704	0.0594928	-2.65179	-4.03136	0.214239	1.31791	1.1237	NA	NA	NA	NA	NA	NA	NA
chr1_10671000_10671600	0.890773	0.0108314	0.00143994	0.0258626	-2.92948	-3.15692	0.187953	1.13275	0.969026	NA	NA	NA	NA	NA	NA	NA
chr1_10671600_10672200	0.378377	0.00533218	0.0186148	0.163397	-2.94072	-2.10112	0.184843	1.03728	0.881426	NA	NA	NA	NA	NA	NA	NA
chr1_10672200_10672800	0.923928	0.678789	0.0230786	-0.0254998	-0.51267	-2.43249	0.266519	1.23513	1.05761	NA	NA	NA	NA	NA	NA	NA
chr1_10673400_10674000	0.720752	0.0572046	0.00146947	-0.0645699	-1.93637	-2.77939	0.180238	1.00897	0.854782	NA	NA	NA	NA	NA	NA	NA
chr1_1067400_1068000	0.968871	0.144794	0.0600379	-0.00511279	-0.939389	-1.05592	0.130759	0.640265	0.556499	NA	NA	NA	NA	NA	NA	NA
chr1_10674000_10674600	0.48205	0.208976	0.0251081	-0.0975354	-0.868445	-1.35155	0.138332	0.687719	0.596306	NA	NA	NA	NA	NA	NA	NA
chr1_10674600_10675200	0.537179	0.540611	0.00656325	-0.0981338	-0.495357	-1.92339	0.158597	0.807366	0.695934	NA	NA	NA	NA	NA	NA	NA
chr1_10675200_10675800	0.430495	0.00231806	0.392708	0.177904	-3.46998	-0.815852	0.224948	1.11616	0.951281	NA	NA	NA	NA	NA	NA	NA
chr1_10675800_10676400	0.566495	0.0424248	0.134792	0.0904493	-1.62895	-1.02825	0.157379	0.794626	0.683201	NA	NA	NA	NA	NA	NA	NA
chr1_10676400_10677000	0.377635	0.000266493	0.0911366	0.131359	-3.39116	-1.30487	0.148369	0.904079	0.766521	NA	NA	NA	NA	NA	NA	NA
chr1_10677000_10677600	0.890604	0.00101515	0.0239957	-0.0276481	-3.96686	-2.30303	0.200616	1.17915	1.00808	NA	NA	NA	NA	NA	NA	NA
chr1_106773000_106773600	0.232205	0.0519299	0.434945	0.313675	-2.33711	-0.799319	0.261303	1.1911	1.02054	NA	NA	NA	NA	NA	NA	NA
chr1_10677600_10678200	0.35396	0.00247087	0.0013601	0.139341	-3.07112	-2.75114	0.149775	0.994376	0.839953	NA	NA	NA	NA	NA	NA	NA
chr1_10678200_10678800	0.277172	0.00305382	0.00217536	0.228531	-4.26421	-3.75187	0.209398	1.41189	1.19905	NA	NA	NA	NA	NA	NA	NA
chr1_10678800_10679400	0.186577	0.000209224	0.0918539	0.27278	-4.61115	-1.75279	0.205416	1.20776	1.03195	NA	NA	NA	NA	NA	NA	NA
chr1_10679400_10680000	0.0878952	0.00423558	0.0767841	0.307644	-2.90935	-1.50623	0.17888	0.998899	0.844229	NA	NA	NA	NA	NA	NA	NA
chr1_1068000_1068600	0.719367	0.00541786	0.751052	0.0598856	-2.32575	-0.225101	0.166301	0.821932	0.707999	NA	NA	NA	NA	NA	NA	NA
chr1_10680000_10680600	0.299639	0.00989524	0.146727	0.177762	-2.39949	-1.13599	0.170686	0.916242	0.778016	NA	NA	NA	NA	NA	NA	NA
chr1_10680600_10681200	0.976268	1.55051e-05	0.275127	-0.00444556	-4.15318	-0.857455	0.149145	0.924081	0.782311	NA	NA	NA	NA	NA	NA	NA
chr1_10681200_10681800	0.626359	0.000322931	0.0781118	0.10378	-4.55852	-1.87004	0.212645	1.23298	1.05291	NA	NA	NA	NA	NA	NA	NA
chr1_10682400_10683000	0.218749	0.176559	0.0289084	-0.21332	-1.22972	-1.70356	0.172593	0.904887	0.77091	NA	NA	NA	NA	NA	NA	NA
chr1_10683000_10683600	0.996958	0.265177	0.0785975	0.000624795	-0.878983	-1.19851	0.16358	0.785387	0.675922	NA	NA	NA	NA	NA	NA	NA
chr1_10683600_10684200	0.569542	0.000948695	0.00719187	-0.0974504	-3.64719	-2.50914	0.170903	1.07762	0.918439	NA	NA	NA	NA	NA	NA	NA
chr1_10684200_10684800	0.124825	0.00353387	0.210856	-0.394844	-4.17011	-1.50555	0.255558	1.40289	1.1972	NA	NA	NA	NA	NA	NA	NA
chr1_10684800_10685400	0.258833	0.00385097	0.021735	-0.271357	-4.40966	-2.94942	0.239243	1.49775	1.26934	NA	NA	NA	NA	NA	NA	NA
chr1_106853400_106854000	0.584294	0.0774703	0.293568	0.147826	-2.33803	-1.18355	0.269497	1.31352	1.12218	NA	NA	NA	NA	NA	NA	NA
chr1_10685400_10686000	0.240115	0.11928	0.877004	-0.227434	-1.31839	-0.111989	0.192705	0.840609	0.722139	NA	NA	NA	NA	NA	NA	NA
chr1_1068600_1069200	0.261759	0.00301014	0.098619	-0.206901	-3.04831	-1.41868	0.183545	1.00774	0.852687	NA	NA	NA	NA	NA	NA	NA
chr1_10686000_10686600	0.582401	0.234942	0.222407	0.135414	-1.11597	0.973087	0.24563	0.93513	0.793609	0.0929119	0.215	-2.08905	1.22649	-1.70328	0.104007	0.00858345
chr1_10686600_10687200	0.831754	0.00781776	0.532297	0.0379798	-2.40702	-0.475052	0.178401	0.890597	0.75861	NA	NA	NA	NA	NA	NA	NA
chr1_10687200_10687800	0.728522	0.0573182	0.00616151	-0.0520507	-1.65923	-2.05701	0.149632	0.864961	0.738453	NA	NA	NA	NA	NA	NA	NA
chr1_10687800_10688400	0.432766	0.28757	0.00242293	-0.126756	-0.950305	-2.34361	0.161069	0.889847	0.757286	NA	NA	NA	NA	NA	NA	NA
chr1_10688400_10689000	0.77252	0.87789	0.000231296	0.0538565	-0.149663	-3.12056	0.185906	0.972126	0.823305	NA	NA	NA	NA	NA	NA	NA
chr1_10689000_10689600	0.634764	0.0307204	0.0262171	0.118162	-3.04387	-2.67037	0.248147	1.39306	1.18723	NA	NA	NA	NA	NA	NA	NA
chr1_10689600_10690200	0.947009	0.00361774	0.00385627	0.0118275	-3.15433	-2.67208	0.177603	1.06392	0.907721	NA	NA	NA	NA	NA	NA	NA
chr1_10690200_10690800	0.849491	0.0496308	0.0669867	-0.0352225	-1.90695	-1.5041	0.185231	0.962115	0.814088	NA	NA	NA	NA	NA	NA	NA
chr1_10690800_10691400	0.228904	0.020429	0.0331559	0.305376	-3.48339	-2.68903	0.252584	1.48369	1.2486	NA	NA	NA	NA	NA	NA	NA
chr1_10691400_10692000	0.43237	0.00617796	0.00526183	0.167001	-3.65396	-3.17723	0.212025	1.31218	1.11892	NA	NA	NA	NA	NA	NA	NA
chr1_1069200_1069800	0.131369	0.0107684	0.728947	-0.252886	-2.09383	-0.242496	0.166536	0.808966	0.698251	NA	NA	NA	NA	NA	NA	NA
chr1_10692600_10693200	0.270201	0.00559893	0.0325453	0.255568	-3.77293	-2.46769	0.230777	1.33868	1.14176	NA	NA	NA	NA	NA	NA	NA
chr1_10693800_10694400	0.0137245	0.00349276	0.41656	-0.67724	-4.46898	-1.03282	0.270991	1.50149	1.26717	NA	NA	NA	NA	NA	NA	NA
chr1_106938600_106939200	0.243383	0.0339142	0.771821	-0.361395	-2.9988	0.345852	0.308353	1.39852	1.19008	0.0274961	0.526285	-3.34465	1.83634	-1.82137	0.0835444	0.0071866
chr1_10695000_10695600	0.00209726	0.179999	0.038573	0.812583	-1.78304	-2.36019	0.258736	1.32256	1.12906	NA	NA	NA	NA	NA	NA	NA
chr1_10696200_10696800	0.213183	0.00068119	0.027483	-0.265971	-4.43701	-2.42465	0.212584	1.27402	1.08715	NA	NA	NA	NA	NA	NA	NA
chr1_10696800_10697400	0.908638	0.0114435	0.207293	-0.026433	-2.84095	-1.20103	0.229882	1.10709	0.947558	NA	NA	NA	NA	NA	NA	NA
chr1_10697400_10698000	0.508269	0.0364918	0.0878848	-0.154766	-2.40087	-1.67288	0.23329	1.13585	0.972664	NA	NA	NA	NA	NA	NA	NA
chr1_1069800_1070400	0.750469	0.253501	0.795701	0.0445742	-0.639408	0.126254	0.139858	0.55742	0.486605	0.098937	0.535049	-0.765661	0.739933	-1.03477	0.313127	0.0220395
chr1_10698000_10698600	0.63847	0.22482	0.0105476	0.0910109	-1.19265	-2.14643	0.193242	0.977784	0.826889	NA	NA	NA	NA	NA	NA	NA
chr1_10698600_10699200	0.222584	0.0467255	9.70313e-05	0.232996	-2.39762	-4.10641	0.190095	1.19383	1.02008	NA	NA	NA	NA	NA	NA	NA
chr1_10701000_10701600	0.504149	0.127171	0.00663689	0.137862	-1.59795	-2.4433	0.205801	1.04074	0.885286	NA	NA	NA	NA	NA	NA	NA
chr1_10701600_10702200	0.529986	0.149936	0.00108217	0.108686	-1.38553	-2.70529	0.172584	0.956525	0.808781	NA	NA	NA	NA	NA	NA	NA
chr1_10702200_10702800	0.705644	0.00688086	0.000109675	0.0751774	-3.92009	-4.7869	0.198586	1.42686	1.19883	NA	NA	NA	NA	NA	NA	NA
chr1_10702800_10703400	0.536281	0.0120908	0.000218338	-0.110475	-2.89005	-3.69499	0.178148	1.13514	0.970781	NA	NA	NA	NA	NA	NA	NA
chr1_107038800_107039400	0.149106	0.00444728	1.51695e-08	-0.458764	-2.86679	5.09349	0.316064	0.989823	0.842084	0.0120267	0.00486465	-7.96027	1.29956	-6.12536	5.50661e-06	1.96475e-05
chr1_1070400_1071000	0.255117	0.0283812	0.475955	0.195427	-1.83797	-0.510289	0.170952	0.828932	0.713748	NA	NA	NA	NA	NA	NA	NA
chr1_10704000_10704600	0.891897	0.000144108	0.0870115	-0.0317084	-3.89637	1.45418	0.232848	0.994061	0.843149	0.00408902	0.113395	-5.35055	1.30348	-4.10482	0.00055058	0.000193646
chr1_107044800_107045400	0.74044	0.000419087	0.105946	-0.0764628	-4.97012	-1.9042	0.230314	1.37172	1.16947	NA	NA	NA	NA	NA	NA	NA
chr1_107045400_107046000	0.759555	0.0452448	0.653129	0.0814739	-2.43796	-0.465126	0.265626	1.20555	1.0325	NA	NA	NA	NA	NA	NA	NA
chr1_10704600_10705200	0.387765	0.00970597	0.955194	0.142784	-2.02061	-0.0374485	0.164753	0.769527	0.665197	NA	NA	NA	NA	NA	NA	NA
chr1_10705200_10705800	0.274197	0.00832572	0.00263752	0.194036	-2.79599	-2.72676	0.176687	1.04309	0.888898	NA	NA	NA	NA	NA	NA	NA
chr1_107056200_107056800	0.57383	0.0392985	0.530531	0.129388	-2.13578	-0.547315	0.22946	1.02557	0.870248	NA	NA	NA	NA	NA	NA	NA
chr1_107056800_107057400	0.92864	0.00111207	0.780748	0.0134909	-2.541	-0.183365	0.150344	0.761538	0.657376	NA	NA	NA	NA	NA	NA	NA
chr1_107057400_107058000	0.437024	0.000128465	0.768596	-0.131697	-3.43044	0.218411	0.16891	0.868329	0.740773	0.00399014	0.525094	-3.64885	1.14138	-3.19689	0.00452823	0.000793459
chr1_10705800_10706400	0.254004	0.0365802	0.10218	0.192076	-1.83927	-1.2216	0.167626	0.870569	0.742046	NA	NA	NA	NA	NA	NA	NA
chr1_10706400_10707000	0.28523	0.0210943	0.0776966	0.206298	-2.35568	-1.51714	0.192233	1.00873	0.852999	NA	NA	NA	NA	NA	NA	NA
chr1_10707000_10707600	0.656046	0.000267957	0.00940736	-0.0895935	-5.11096	-3.06194	0.200689	1.36313	1.16115	NA	NA	NA	NA	NA	NA	NA
chr1_10708800_10709400	0.977939	0.00451138	0.00360001	0.00626491	-4.2105	-3.60764	0.22611	1.45618	1.21616	NA	NA	NA	NA	NA	NA	NA
chr1_10710000_10710600	0.210637	0.196036	6.91676e-05	-0.281705	-1.76784	-4.75837	0.223901	1.36013	1.15641	NA	NA	NA	NA	NA	NA	NA
chr1_10710600_10711200	0.745966	0.0425253	0.000206011	-0.0750892	-3.02893	-4.66701	0.23128	1.47829	1.22102	NA	NA	NA	NA	NA	NA	NA
chr1_107122200_107122800	0.0894359	0.0106962	0.703722	-0.485667	-3.72152	-0.464671	0.283775	1.43648	1.2191	NA	NA	NA	NA	NA	NA	NA
chr1_10712400_10713000	0.590566	0.0182877	0.000246561	0.116493	-3.54501	-4.70192	0.215974	1.4829	1.24635	NA	NA	NA	NA	NA	NA	NA
chr1_10713600_10714200	0.835363	0.00433078	0.0404071	-0.0370583	-2.90163	-1.74936	0.177947	0.998792	0.844801	NA	NA	NA	NA	NA	NA	NA
chr1_107139600_107140200	0.341701	0.0372594	0.520552	-0.223012	-2.24367	-0.582088	0.233672	1.06587	0.903465	NA	NA	NA	NA	NA	NA	NA
chr1_107140200_107140800	0.192617	0.0149056	0.638368	-0.279005	-2.51298	-0.405815	0.21301	1.01812	0.861397	NA	NA	NA	NA	NA	NA	NA
chr1_107140800_107141400	0.14943	0.000113226	0.309207	0.335728	-4.11839	0.897874	0.231485	1.03361	0.879431	0.00388303	0.274391	-5.01626	1.35711	-3.69629	0.00142953	0.000353319
chr1_107141400_107142000	0.163945	0.00534642	0.038848	0.330954	-3.86862	-2.42958	0.236394	1.36501	1.16392	NA	NA	NA	NA	NA	NA	NA
chr1_10714200_10714800	0.843439	0.00177693	0.118048	-0.0381505	-3.34458	-1.39924	0.192776	1.04759	0.889155	NA	NA	NA	NA	NA	NA	NA
chr1_10714800_10715400	0.176418	0.155267	0.000420992	-0.227764	-1.38481	-2.96528	0.167544	0.968629	0.818689	NA	NA	NA	NA	NA	NA	NA
chr1_10715400_10716000	0.13792	0.0663351	8.17078e-05	-0.275372	-2.05615	-3.86587	0.184445	1.11019	0.949601	NA	NA	NA	NA	NA	NA	NA
chr1_1071600_1072200	0.687073	0.000647819	0.140329	0.0779945	-3.7247	-1.34245	0.193174	1.06499	0.904719	NA	NA	NA	NA	NA	NA	NA
chr1_10716000_10716600	0.728782	0.0182441	0.0475494	-0.0824134	-3.0202	-2.15935	0.237153	1.26288	1.07927	NA	NA	NA	NA	NA	NA	NA
chr1_107164200_107164800	0.680168	0.904277	0.000568255	-0.134417	-0.12244	3.05406	0.32532	1.01609	0.863797	0.307395	0.0131029	-3.1765	1.33364	-2.38183	0.0272712	0.00300638
chr1_10716600_10717200	0.902013	0.118006	0.00395819	0.0252059	-1.73972	-2.76323	0.204321	1.10539	0.94145	NA	NA	NA	NA	NA	NA	NA
chr1_10717800_10718400	0.384107	0.00632436	0.20645	0.209869	-3.43796	-1.34388	0.240298	1.2382	1.05828	NA	NA	NA	NA	NA	NA	NA
chr1_10719000_10719600	0.531652	5.90061e-05	0.191737	0.12724	-4.85299	-1.3108	0.20287	1.16765	0.998752	NA	NA	NA	NA	NA	NA	NA
chr1_10719600_10720200	0.324484	1.53966e-05	0.611775	0.194138	-4.76436	-0.460029	0.196274	1.05966	0.904146	NA	NA	NA	NA	NA	NA	NA
chr1_10720200_10720800	0.547012	0.0206346	0.00598483	-0.122337	-2.70911	-2.76441	0.202592	1.15582	0.988852	NA	NA	NA	NA	NA	NA	NA
chr1_10720800_10721400	0.196989	0.0331707	0.0551323	-0.259727	-2.2417	-1.70695	0.200256	1.04098	0.881857	NA	NA	NA	NA	NA	NA	NA
chr1_10721400_10722000	0.811247	0.195935	0.26774	0.0518267	-1.2648	-0.916985	0.216563	0.972883	0.823767	NA	NA	NA	NA	NA	NA	NA
chr1_1072200_1072800	0.254563	0.0392925	0.24253	-0.219514	-1.99888	-0.956223	0.191797	0.959805	0.814396	NA	NA	NA	NA	NA	NA	NA
chr1_10722000_10722600	0.64855	0.206061	0.00631035	-0.0975856	-1.35353	-2.52734	0.2136	1.06496	0.909986	NA	NA	NA	NA	NA	NA	NA
chr1_10722600_10723200	0.493417	0.00108882	0.618562	-0.113423	-2.91041	-0.370872	0.165131	0.870585	0.743061	NA	NA	NA	NA	NA	NA	NA
chr1_10723200_10723800	0.430371	0.00293012	0.000575769	-0.146626	-3.96361	-3.93526	0.18535	1.30655	1.11424	NA	NA	NA	NA	NA	NA	NA
chr1_10723800_10724400	0.154217	0.00254823	0.00701551	-0.315493	-4.37722	-3.30373	0.220112	1.42181	1.20547	NA	NA	NA	NA	NA	NA	NA
chr1_10724400_10725000	0.175688	0.000238887	0.227935	-0.311473	-4.89151	-1.33839	0.228732	1.29359	1.1047	NA	NA	NA	NA	NA	NA	NA
chr1_10725000_10725600	0.776711	0.0357028	0.137409	0.0680629	-2.44418	-1.47315	0.239481	1.15136	0.985424	NA	NA	NA	NA	NA	NA	NA
chr1_10725600_10726200	0.725014	0.0298485	0.00109572	0.076629	-2.8884	-3.74836	0.21736	1.31483	1.12188	NA	NA	NA	NA	NA	NA	NA
chr1_10726200_10726800	0.847954	0.00125984	0.548227	-0.0305125	-2.76544	-0.432565	0.158819	0.838328	0.718513	NA	NA	NA	NA	NA	NA	NA
chr1_10726800_10727400	0.754278	0.00122612	0.332657	-0.0590719	-3.30155	-0.820774	0.188319	0.998342	0.843999	NA	NA	NA	NA	NA	NA	NA
chr1_10727400_10728000	0.661199	0.0384192	0.157933	0.0859164	-2.04193	-1.17309	0.195581	0.976021	0.825874	NA	NA	NA	NA	NA	NA	NA
chr1_1072800_1073400	0.68377	0.0187249	0.922256	-0.0660556	-1.76773	-0.0628213	0.161798	0.742276	0.642437	NA	NA	NA	NA	NA	NA	NA
chr1_10728000_10728600	0.98395	0.000207719	0.0385559	0.00428467	-5.15976	-2.40676	0.212565	1.35074	1.15123	NA	NA	NA	NA	NA	NA	NA
chr1_10728600_10729200	0.377792	0.0125562	0.0352493	-0.20563	-3.27887	-2.35344	0.232333	1.29493	1.10583	NA	NA	NA	NA	NA	NA	NA
chr1_10729200_10729800	0.294273	0.00350811	0.130026	-0.182962	-2.84232	-1.23188	0.17373	0.955426	0.808393	NA	NA	NA	NA	NA	NA	NA
chr1_107292000_107292600	0.508987	0.0107759	0.935174	-0.187579	-3.67369	-0.0986806	0.28323	1.4195	1.21084	NA	NA	NA	NA	NA	NA	NA
chr1_10732800_10733400	0.768383	0.109207	0.00304986	-0.0705994	-2.19046	-3.49761	0.239222	1.35794	1.1579	NA	NA	NA	NA	NA	NA	NA
chr1_1073400_1074000	0.744063	0.0038732	0.934779	-0.0648443	-2.78637	0.0659053	0.198186	0.947012	0.803765	0.0114284	0.578112	-2.85228	1.24212	-2.29629	0.032597	0.00344439
chr1_10735200_10735800	0.822232	0.00944996	0.0672728	0.0459852	-2.78722	-1.6585	0.204252	1.05762	0.898614	NA	NA	NA	NA	NA	NA	NA
chr1_107352600_107353200	0.200075	0.08	0.351446	0.377641	-2.59636	-1.17153	0.293193	1.4712	1.25267	NA	NA	NA	NA	NA	NA	NA
chr1_10735800_10736400	0.965131	0.0207901	0.000740015	0.00944284	-3.14814	-3.96354	0.21558	1.34481	1.14609	NA	NA	NA	NA	NA	NA	NA
chr1_10736400_10737000	0.772553	0.0968494	4.50182e-05	-0.050553	-1.7512	-3.76372	0.174529	1.04694	0.890586	NA	NA	NA	NA	NA	NA	NA
chr1_10737000_10737600	0.404386	0.00148034	0.155275	0.130771	-2.89833	-1.08554	0.156312	0.891985	0.759314	NA	NA	NA	NA	NA	NA	NA
chr1_10737600_10738200	0.671307	0.000405428	0.247383	0.061495	-3.06885	-0.842495	0.144578	0.844778	0.724994	NA	NA	NA	NA	NA	NA	NA
chr1_10738200_10738800	0.828149	0.00342149	0.0134046	-0.0447601	-3.65054	-2.62184	0.205771	1.22373	1.04544	NA	NA	NA	NA	NA	NA	NA
chr1_10738800_10739400	0.279009	0.152098	8.33906e-06	-0.214318	-1.83372	-5.04432	0.19713	1.27271	1.08578	NA	NA	NA	NA	NA	NA	NA
chr1_107389800_107390400	0.505012	0.176176	0.298457	-0.190965	-1.85063	-1.21317	0.285653	1.36057	1.16202	NA	NA	NA	NA	NA	NA	NA
chr1_10739400_10740000	0.847597	0.00109286	0.204869	-0.0270814	-2.65207	-0.871721	0.140626	0.793576	0.68406	NA	NA	NA	NA	NA	NA	NA
chr1_1074000_1074600	0.22737	0.0034662	0.0515197	-0.201041	-2.90578	-1.62081	0.165736	0.975466	0.82457	NA	NA	NA	NA	NA	NA	NA
chr1_10740000_10740600	0.781522	0.00257836	0.0315636	0.0512679	-3.19634	-1.91692	0.184467	1.03951	0.881781	NA	NA	NA	NA	NA	NA	NA
chr1_10742400_10743000	0.536925	0.000772006	0.0588941	-0.131605	-4.24439	-2.00467	0.212557	1.23175	1.05171	NA	NA	NA	NA	NA	NA	NA
chr1_10743000_10743600	0.984796	0.000385537	0.0133103	-0.00377764	-4.63851	-2.72399	0.197846	1.27185	1.08503	NA	NA	NA	NA	NA	NA	NA
chr1_10744200_10744800	0.929412	1.34437e-07	1.70639e-10	0.0266079	3.51334	3.84591	0.299772	0.628901	0.553442	0.00116227	0.00417698	-0.332573	0.837744	-0.396987	0.695582	0.046945
chr1_10744800_10745400	0.470472	0.979199	0.0679375	-0.182201	0.0224719	1.36125	0.251701	0.860201	0.739366	0.326636	0.0979174	-1.33878	1.13429	-1.18028	0.251737	0.0181025
chr1_10745400_10746000	0.840505	0.010664	0.00767175	0.0434685	-3.22745	-2.88196	0.215554	1.24525	1.06372	NA	NA	NA	NA	NA	NA	NA
chr1_1074600_1075200	0.901443	0.0613964	0.00660162	-0.0167005	-1.44785	-1.83001	0.134588	0.767146	0.662631	NA	NA	NA	NA	NA	NA	NA
chr1_10746000_10746600	0.204151	0.00478444	0.0141745	0.278454	-3.67059	-2.71384	0.218161	1.27819	1.09117	NA	NA	NA	NA	NA	NA	NA
chr1_10746600_10747200	0.341015	0.0118409	0.0195747	0.225451	-3.47486	-2.7449	0.23589	1.36074	1.16094	NA	NA	NA	NA	NA	NA	NA
chr1_10747200_10747800	0.957619	0.039113	0.0276048	0.0117173	-2.33646	-2.13825	0.220058	1.12086	0.959506	NA	NA	NA	NA	NA	NA	NA
chr1_10747800_10748400	0.770362	0.40812	0.185851	-0.0550554	-0.715998	-0.984034	0.188207	0.862697	0.739793	NA	NA	NA	NA	NA	NA	NA
chr1_107479800_107480400	0.848924	0.00132819	0.383802	0.0462698	-4.23999	-0.963397	0.242402	1.29165	1.10237	NA	NA	NA	NA	NA	NA	NA
chr1_107480400_107481000	0.680627	0.00858488	0.0215693	0.0924566	-3.40953	-2.53833	0.224107	1.27716	1.09101	NA	NA	NA	NA	NA	NA	NA
chr1_10748400_10749000	0.896395	0.106336	0.28645	0.0245603	-1.47868	-0.830661	0.188235	0.90916	0.776001	NA	NA	NA	NA	NA	NA	NA
chr1_10749000_10749600	0.421374	0.0935627	0.0207761	0.178725	-1.8455	-2.18607	0.221565	1.0923	0.933731	NA	NA	NA	NA	NA	NA	NA
chr1_10749600_10750200	0.627285	0.106119	0.000113767	0.108291	-2.2606	-4.66536	0.222484	1.38905	1.17126	NA	NA	NA	NA	NA	NA	NA
chr1_10750200_10750800	0.893846	0.0841809	0.00304182	0.0347294	-2.72484	-3.90831	0.259742	1.5655	1.2935	NA	NA	NA	NA	NA	NA	NA
chr1_10751400_10752000	0.84769	0.0066781	0.00693309	-0.0451387	-4.01309	-3.32472	0.234537	1.45521	1.21131	NA	NA	NA	NA	NA	NA	NA
chr1_1075200_1075800	0.58318	0.00161907	0.154247	-0.0789803	-2.6168	-0.998378	0.143561	0.812269	0.696595	NA	NA	NA	NA	NA	NA	NA
chr1_10752000_10752600	0.629505	0.00337087	0.0482748	0.114358	-4.03091	-2.2943	0.236474	1.34903	1.15051	NA	NA	NA	NA	NA	NA	NA
chr1_10752600_10753200	0.0547977	0.00301203	0.707637	-0.511087	-4.14059	-0.438855	0.263672	1.36893	1.16756	NA	NA	NA	NA	NA	NA	NA
chr1_107526600_107527200	0.960284	0.000100431	1.10395e-07	0.0190424	3.4187	4.18119	0.381649	0.851175	0.74279	0.00376568	0.00565871	-0.762492	1.12971	-0.674947	0.507438	0.0345981
chr1_10753200_10753800	0.371647	0.0137133	0.0143159	0.185376	-2.79844	-2.37878	0.206763	1.11963	0.957879	NA	NA	NA	NA	NA	NA	NA
chr1_107532000_107532600	0.308337	0.917842	0.00430069	0.310352	-0.102921	2.47689	0.303429	0.995771	0.851906	0.310959	0.0251625	-2.57981	1.31046	-1.96863	0.0630114	0.00573423
chr1_107532600_107533200	0.504775	0.465307	0.062748	0.163865	-0.627673	1.38634	0.244979	0.857075	0.738417	0.169512	0.0932776	-2.01401	1.1313	-1.78026	0.090231	0.00764332
chr1_107533200_107533800	0.955593	0.0295653	0.133641	0.0143542	-2.98915	-1.74927	0.257269	1.35829	1.15881	NA	NA	NA	NA	NA	NA	NA
chr1_10754400_10755000	0.868463	0.137397	0.00126352	-0.0299868	-1.51108	-2.81757	0.180703	1.01077	0.854361	NA	NA	NA	NA	NA	NA	NA
chr1_107547600_107548200	0.0296689	0.0200648	0.00105196	-0.673825	-2.58147	3.13726	0.30639	1.09627	0.935535	0.0217581	0.0154575	-5.71874	1.44119	-3.96806	0.000758071	0.000237092
chr1_107548200_107548800	0.516394	0.0771705	0.447929	0.215369	-2.46108	0.898436	0.330965	1.38124	1.18024	0.042283	0.362768	-3.35952	1.81681	-1.84913	0.079276	0.00688394
chr1_10755000_10755600	0.970682	0.135256	1.80133e-05	0.00679707	-1.69491	-4.29878	0.184575	1.1275	0.964437	NA	NA	NA	NA	NA	NA	NA
chr1_10755600_10756200	0.674082	4.17068e-05	0.194749	0.0843297	-4.83081	-1.26851	0.200058	1.13781	0.973138	NA	NA	NA	NA	NA	NA	NA
chr1_10756200_10756800	0.78789	0.0178744	0.892878	0.0384302	-1.54056	-0.075235	0.142535	0.64207	0.557574	NA	NA	NA	NA	NA	NA	NA
chr1_10756800_10757400	0.859553	0.00628582	0.545695	0.0291539	-2.29816	-0.430376	0.16443	0.827067	0.710369	NA	NA	NA	NA	NA	NA	NA
chr1_107568600_107569200	0.57803	0.0555991	0.00808403	0.133771	-2.59964	-3.08845	0.239863	1.34566	1.14774	NA	NA	NA	NA	NA	NA	NA
chr1_107569200_107569800	0.726905	0.271914	0.0535901	0.0869764	-1.27968	-1.93547	0.248492	1.15971	0.993448	NA	NA	NA	NA	NA	NA	NA
chr1_107569800_107570400	0.727472	0.149778	0.0233217	-0.0876634	-1.85698	-2.51508	0.250998	1.28149	1.09549	NA	NA	NA	NA	NA	NA	NA
chr1_107570400_107571000	0.67324	1.07668e-06	0.946193	-0.081842	-5.2873	0.0594844	0.193625	1.03163	0.879663	0.00162277	0.581229	-5.34678	1.35576	-3.94377	0.000802363	0.000244279
chr1_10759200_10759800	0.401463	0.00419319	0.524763	-0.135524	-2.37558	-0.446221	0.160986	0.814694	0.699645	NA	NA	NA	NA	NA	NA	NA
chr1_10759800_10760400	0.701409	0.0928104	0.00157118	0.0846202	-2.09468	-3.41536	0.220202	1.2369	1.05709	NA	NA	NA	NA	NA	NA	NA
chr1_10760400_10761000	0.217335	0.253039	0.0535055	-0.309802	-1.33585	-1.94258	0.249882	1.16343	0.996738	NA	NA	NA	NA	NA	NA	NA
chr1_10761000_10761600	0.0145939	0.398268	2.01505e-05	-0.65128	-0.686389	3.10985	0.263017	0.809827	0.702089	0.146813	0.00857589	-3.79624	1.0718	-3.54194	0.00204631	0.000456087
chr1_10761600_10762200	0.370295	0.254658	0.000596593	-0.208336	-0.843682	2.25807	0.231714	0.737305	0.64123	0.0992944	0.0132513	-3.10175	0.977136	-3.17433	0.00476729	0.000823942
chr1_10762200_10762800	0.616377	0.108226	0.00249026	0.121635	-2.24453	-3.64513	0.242191	1.38756	1.18119	NA	NA	NA	NA	NA	NA	NA
chr1_10762800_10763400	0.401624	0.00356046	0.0010225	-0.149239	-3.40744	-3.29835	0.177339	1.14727	0.981068	NA	NA	NA	NA	NA	NA	NA
chr1_10763400_10764000	0.284176	0.068108	0.000175431	-0.200872	-2.06856	-3.71815	0.186766	1.12425	0.9617	NA	NA	NA	NA	NA	NA	NA
chr1_10764600_10765200	0.071277	0.093872	0.0243515	0.37431	-1.74791	-2.00254	0.205787	1.03552	0.878801	NA	NA	NA	NA	NA	NA	NA
chr1_10765200_10765800	0.540206	0.180253	0.0470274	0.131274	-1.39084	-1.75395	0.213746	1.03225	0.874547	NA	NA	NA	NA	NA	NA	NA
chr1_10765800_10766400	0.720773	0.183511	0.00277543	0.087455	-1.77329	-3.45417	0.244138	1.32602	1.13208	NA	NA	NA	NA	NA	NA	NA
chr1_10766400_10767000	0.305166	0.131307	0.071538	-0.257613	-1.86256	-1.90566	0.250214	1.22637	1.04867	NA	NA	NA	NA	NA	NA	NA
chr1_10767000_10767600	0.516739	0.000153815	0.877581	-0.118932	-3.72102	-0.124539	0.182918	0.953618	0.806877	NA	NA	NA	NA	NA	NA	NA
chr1_10767600_10768200	0.190516	0.0227992	0.000297933	0.252787	-2.812	-3.87744	0.192076	1.22007	1.04238	NA	NA	NA	NA	NA	NA	NA
chr1_107680800_107681400	0.00437751	0.146131	0.968011	-0.917749	-2.01437	0.0472596	0.316296	1.37756	1.17615	0.0644009	0.586655	-2.06163	1.81135	-1.13818	0.268498	0.01917
chr1_10768200_10768800	0.21017	0.0702751	0.013699	0.237418	-1.85295	-2.14504	0.188507	1.01505	0.85808	NA	NA	NA	NA	NA	NA	NA
chr1_10768800_10769400	0.997461	0.00589742	0.0146134	-0.000746218	-3.96508	-2.98308	0.233994	1.41578	1.20495	NA	NA	NA	NA	NA	NA	NA
chr1_107690400_107691000	0.564151	0.0363959	0.856772	-0.181922	-3.02532	0.220797	0.314635	1.43052	1.22087	0.0284276	0.556243	-3.24611	1.88067	-1.72604	0.0997571	0.00829363
chr1_10771800_10772400	0.291221	0.0204122	0.137592	-0.260244	-2.9287	-1.59342	0.245548	1.24726	1.06638	NA	NA	NA	NA	NA	NA	NA
chr1_10772400_10773000	0.323081	0.227524	0.000325364	-0.227047	-1.56441	-4.06982	0.228878	1.29011	1.10143	NA	NA	NA	NA	NA	NA	NA
chr1_10773000_10773600	0.926483	0.00172846	0.0508142	-0.0194029	-3.83857	-2.02117	0.209867	1.19908	1.02508	NA	NA	NA	NA	NA	NA	NA
chr1_107731800_107732400	0.122971	0.0046014	0.874826	-0.358379	-3.0349	-0.141424	0.230805	1.05202	0.895945	NA	NA	NA	NA	NA	NA	NA
chr1_107732400_107733000	0.615661	0.00277378	0.64811	-0.0944177	-2.87365	-0.364873	0.187617	0.941762	0.797581	NA	NA	NA	NA	NA	NA	NA
chr1_10773600_10774200	0.904064	0.0327701	0.285726	-0.0186965	-1.63356	-0.701336	0.154811	0.756816	0.654198	NA	NA	NA	NA	NA	NA	NA
chr1_10774800_10775400	0.676333	0.0022523	0.0208273	-0.0924053	-4.20626	-2.69158	0.220834	1.34903	1.15012	NA	NA	NA	NA	NA	NA	NA
chr1_10776600_10777200	0.401639	0.0286492	0.365727	0.15875	-2.03191	-0.707181	0.188648	0.917977	0.779047	NA	NA	NA	NA	NA	NA	NA
chr1_10777200_10777800	0.99393	0.00241099	0.156733	-0.00165282	-3.46131	-1.36333	0.216823	1.11788	0.957018	NA	NA	NA	NA	NA	NA	NA
chr1_10779600_10780200	0.446694	0.979878	0.0714282	0.236885	0.0357899	-2.19787	0.31034	1.41622	1.20899	0.326821	0.100787	2.23366	1.86208	1.19955	0.244333	0.0176237
chr1_107805600_107806200	0.244348	0.297326	0.0674961	0.334286	-1.54049	-2.31502	0.285812	1.47207	1.25537	NA	NA	NA	NA	NA	NA	NA
chr1_107806200_107806800	0.447074	0.379986	0.119444	0.225132	-1.28514	-1.95052	0.295189	1.45874	1.24422	NA	NA	NA	NA	NA	NA	NA
chr1_10781400_10782000	0.11748	0.0137185	0.0121072	-0.365114	-3.38955	-2.94379	0.231652	1.35621	1.15647	NA	NA	NA	NA	NA	NA	NA
chr1_107821200_107821800	0.0211621	0.0422325	0.660205	-0.705626	-2.75253	0.505166	0.30232	1.34146	1.14638	0.030524	0.47734	-3.2577	1.76456	-1.84618	0.0797211	0.00691771
chr1_107835000_107835600	0.449838	0.011785	0.0190705	0.182834	-3.57668	-2.83302	0.241197	1.39967	1.19313	NA	NA	NA	NA	NA	NA	NA
chr1_107835600_107836200	0.0820097	0.11672	0.00388255	0.415289	-2.02981	-3.22786	0.2369	1.28515	1.09736	NA	NA	NA	NA	NA	NA	NA
chr1_107844600_107845200	0.473244	0.322975	0.00516746	0.184559	-1.34798	-3.30004	0.256562	1.35855	1.15966	NA	NA	NA	NA	NA	NA	NA
chr1_10785600_10786200	0.506729	0.16813	0.0101611	0.151806	-1.57045	-2.53123	0.227998	1.13296	0.970086	NA	NA	NA	NA	NA	NA	NA
chr1_10786200_10786800	0.983344	0.00703804	0.0732337	-0.00470667	-3.26476	-1.84161	0.225012	1.19174	1.01954	NA	NA	NA	NA	NA	NA	NA
chr1_10786800_10787400	0.838266	0.0027468	0.0604634	-0.0432598	-3.50698	-1.86083	0.211508	1.14813	0.982356	NA	NA	NA	NA	NA	NA	NA
chr1_10787400_10788000	0.964628	0.014578	1.71779e-05	-0.00746013	-2.8872	-4.45107	0.167892	1.1658	0.995973	NA	NA	NA	NA	NA	NA	NA
chr1_1078800_1079400	0.68311	0.107032	0.391426	0.100772	-1.58762	0.713066	0.246289	0.978106	0.829178	0.0519029	0.328087	-2.30069	1.28227	-1.79422	0.08791	0.00748425
chr1_10788000_10788600	0.457398	0.34075	0.000148796	0.163858	-1.14747	-4.01095	0.219822	1.19994	1.02556	NA	NA	NA	NA	NA	NA	NA
chr1_10788600_10789200	0.208543	0.580498	0.00188108	0.302613	-0.665719	-3.26207	0.23941	1.20149	1.02748	NA	NA	NA	NA	NA	NA	NA
chr1_10789800_10790400	0.0377732	0.0322819	0.080848	0.563984	-3.23286	-2.22885	0.268661	1.49347	1.26654	NA	NA	NA	NA	NA	NA	NA
chr1_10793400_10794000	0.0866066	0.0189328	0.337425	-0.446093	-3.03093	-1.04998	0.258314	1.27497	1.09043	NA	NA	NA	NA	NA	NA	NA
chr1_107937000_107937600	0.766432	0.646133	0.0643229	0.0900839	-0.674221	-2.32872	0.302618	1.46494	1.24786	NA	NA	NA	NA	NA	NA	NA
chr1_107938200_107938800	0.171609	0.0537952	0.543933	-0.401467	-2.83718	-0.754625	0.292017	1.45755	1.24011	NA	NA	NA	NA	NA	NA	NA
chr1_1079400_1080000	0.759355	0.212637	0.46879	-0.0442262	-0.69954	0.354112	0.144065	0.558454	0.487337	0.0857429	0.375052	-1.05365	0.741193	-1.42156	0.170561	0.0129193
chr1_10794000_10794600	0.344226	0.0603767	0.0761713	-0.194238	-1.96494	-1.56822	0.204593	1.03696	0.877123	NA	NA	NA	NA	NA	NA	NA
chr1_10794600_10795200	0.259316	0.00475549	0.116214	-0.280547	-4.01336	-1.88314	0.247598	1.39655	1.19062	NA	NA	NA	NA	NA	NA	NA
chr1_10795200_10795800	0.945991	0.00443302	0.00282739	0.013845	-3.75788	-3.36892	0.203974	1.29701	1.10631	NA	NA	NA	NA	NA	NA	NA
chr1_10795800_10796400	0.977745	0.00299058	0.023424	0.00702413	-4.75086	-2.97437	0.251296	1.56949	1.29652	NA	NA	NA	NA	NA	NA	NA
chr1_107963400_107964000	0.336416	0.837371	0.015437	0.254621	-0.251842	-2.57388	0.263878	1.22444	1.04839	NA	NA	NA	NA	NA	NA	NA
chr1_10796400_10797000	0.268134	0.0194277	0.131141	-0.32181	-3.76806	-1.99922	0.289335	1.59173	1.31579	NA	NA	NA	NA	NA	NA	NA
chr1_107964000_107964600	0.726464	0.000871953	0.0344948	0.0624058	-3.52201	-1.87333	0.177994	1.03294	0.876528	NA	NA	NA	NA	NA	NA	NA
chr1_107964600_107965200	0.213273	0.00031381	0.17835	0.274025	-4.46256	-1.39281	0.219065	1.2044	1.02917	NA	NA	NA	NA	NA	NA	NA
chr1_107965200_107965800	0.422799	0.0458556	0.00323677	0.187725	-2.75713	-3.49876	0.23344	1.36729	1.16576	NA	NA	NA	NA	NA	NA	NA
chr1_107965800_107966400	0.488754	0.0268453	0.00156502	0.15514	-3.0819	-3.79095	0.223444	1.37601	1.1729	NA	NA	NA	NA	NA	NA	NA
chr1_107967600_107968200	0.516135	0.134152	0.00160984	0.156515	-2.1019	-3.83053	0.240373	1.39425	1.18836	NA	NA	NA	NA	NA	NA	NA
chr1_107968200_107968800	0.74962	0.0422368	0.0040293	0.070201	-2.53088	-3.08736	0.219493	1.23346	1.05401	NA	NA	NA	NA	NA	NA	NA
chr1_107991600_107992200	0.0389739	0.0757845	0.662581	-0.583529	-2.32249	-0.485139	0.279731	1.29726	1.10921	NA	NA	NA	NA	NA	NA	NA
chr1_107993400_107994000	0.445046	0.0580151	0.731305	-0.191436	-2.00948	0.306247	0.24989	1.05051	0.889874	0.0359252	0.509258	-2.31573	1.37675	-1.68202	0.108114	0.00885846
chr1_107994000_107994600	0.424435	0.40239	0.0205849	-0.23315	-0.873548	2.07008	0.290953	1.03973	0.88283	0.148177	0.0508903	-2.94363	1.36397	-2.15813	0.0432531	0.00427849
chr1_1080000_1080600	0.384801	0.0126042	0.0362501	-0.143376	-2.41361	-1.71099	0.164405	0.953741	0.8084	NA	NA	NA	NA	NA	NA	NA
chr1_10800000_10800600	0.0796821	0.0813878	0.0101989	0.419047	-2.21143	-2.80616	0.237195	1.2589	1.076	NA	NA	NA	NA	NA	NA	NA
chr1_108019800_108020400	0.125234	0.528024	0.0098446	-0.413045	-0.890268	-3.13687	0.267631	1.40695	1.19696	NA	NA	NA	NA	NA	NA	NA
chr1_108021000_108021600	0.0510214	0.000804508	0.131442	-0.473131	-4.88957	-1.81482	0.240178	1.42403	1.19536	NA	NA	NA	NA	NA	NA	NA
chr1_108021600_108022200	0.0596896	0.0165341	0.254407	-0.539017	-3.69033	-1.438	0.283684	1.51922	1.25602	NA	NA	NA	NA	NA	NA	NA
chr1_108037200_108037800	0.275681	0.000587241	0.503507	0.262784	-4.43867	-0.721096	0.240033	1.25882	1.07484	NA	NA	NA	NA	NA	NA	NA
chr1_108037800_108038400	0.269438	0.00244646	0.0340499	0.268449	-4.57899	-2.63844	0.242021	1.48108	1.23141	NA	NA	NA	NA	NA	NA	NA
chr1_108039600_108040200	0.0465327	0.213265	0.0150465	0.51457	-1.68871	-2.83955	0.255988	1.34998	1.15208	NA	NA	NA	NA	NA	NA	NA
chr1_10804200_10804800	0.554692	0.00421542	0.0096639	0.13116	-4.03382	-3.10028	0.221436	1.38422	1.18	NA	NA	NA	NA	NA	NA	NA
chr1_108045600_108046200	0.749437	0.00856546	0.153838	-0.0864769	-4.1227	-1.84302	0.270177	1.54384	1.28464	NA	NA	NA	NA	NA	NA	NA
chr1_108046800_108047400	0.817496	0.103964	0.0750087	-0.0564621	-1.92807	-1.8101	0.244165	1.17733	1.00834	NA	NA	NA	NA	NA	NA	NA
chr1_108047400_108048000	0.570257	0.152868	0.0135019	-0.145788	-1.98918	-2.9581	0.25615	1.38322	1.18078	NA	NA	NA	NA	NA	NA	NA
chr1_108082200_108082800	0.572062	0.238731	0.00820711	-0.151323	-1.76983	-3.39532	0.267125	1.49514	1.26429	NA	NA	NA	NA	NA	NA	NA
chr1_108111000_108111600	0.471237	0.00652972	0.0213107	0.165987	-3.72394	-2.67684	0.2297	1.34655	1.14822	NA	NA	NA	NA	NA	NA	NA
chr1_108111600_108112200	0.882531	0.114289	0.014523	-0.0351378	-1.94301	-2.58986	0.237323	1.22192	1.04514	NA	NA	NA	NA	NA	NA	NA
chr1_1081200_1081800	0.478302	0.00534027	0.0166154	0.143966	-3.30698	-2.42293	0.202445	1.16668	0.998225	NA	NA	NA	NA	NA	NA	NA
chr1_108121200_108121800	0.836152	0.100857	0.756877	-0.0484225	-1.65639	-0.263358	0.233651	1.00223	0.84885	NA	NA	NA	NA	NA	NA	NA
chr1_108121800_108122400	0.167904	0.0734972	0.15116	0.370134	-2.4151	-1.6516	0.266882	1.33827	1.14366	NA	NA	NA	NA	NA	NA	NA
chr1_10812600_10813200	0.226225	0.0562382	0.0663493	0.296712	-2.36588	-1.94393	0.244	1.2279	1.04965	NA	NA	NA	NA	NA	NA	NA
chr1_108131400_108132000	0.466671	0.304176	0.514005	0.206486	-1.29597	-0.70363	0.282819	1.25616	1.07515	NA	NA	NA	NA	NA	NA	NA
chr1_10813200_10813800	0.955907	0.508129	0.00351885	0.0137796	-0.820785	-3.14578	0.248733	1.23681	1.05779	NA	NA	NA	NA	NA	NA	NA
chr1_108132000_108132600	0.974871	0.0152668	0.444062	0.00827321	-3.13079	-0.836401	0.262128	1.27306	1.08942	NA	NA	NA	NA	NA	NA	NA
chr1_10813800_10814400	0.285827	0.111359	9.99521e-05	-0.207735	-1.83552	-3.93424	0.193814	1.14487	0.979222	NA	NA	NA	NA	NA	NA	NA
chr1_10814400_10815000	0.354181	0.0227927	0.0108046	-0.202378	-2.79153	-2.67898	0.217632	1.21113	1.03553	NA	NA	NA	NA	NA	NA	NA
chr1_10815000_10815600	0.55693	0.655283	0.0990931	0.118789	-0.408338	-1.29338	0.201691	0.912509	0.778482	NA	NA	NA	NA	NA	NA	NA
chr1_108158400_108159000	0.0666795	0.150142	0.0810049	-0.532499	-2.22325	-2.24036	0.287885	1.53564	1.27375	NA	NA	NA	NA	NA	NA	NA
chr1_108160200_108160800	0.606886	0.000407499	0.813341	-0.0904819	-3.30707	-0.183114	0.175419	0.910717	0.773911	NA	NA	NA	NA	NA	NA	NA
chr1_108160800_108161400	0.246838	0.00483797	0.927945	-0.316853	-3.90131	-0.105191	0.272346	1.36031	1.16092	NA	NA	NA	NA	NA	NA	NA
chr1_10816200_10816800	0.646275	0.00289241	0.139983	-0.10962	-3.88965	-1.62378	0.238285	1.28041	1.09335	NA	NA	NA	NA	NA	NA	NA
chr1_108166800_108167400	0.899744	0.000141455	0.290288	0.0207987	-3.06242	0.716263	0.16476	0.780301	0.674504	0.0040671	0.261784	-3.77869	1.03142	-3.66358	0.0015426	0.000373671
chr1_108167400_108168000	0.775069	0.000242148	0.286353	-0.0544864	-3.40077	0.821611	0.190273	0.90025	0.767392	0.00468474	0.258922	-4.22238	1.18294	-3.5694	0.00192001	0.000434087
chr1_10816800_10817400	0.237213	0.031887	0.00479062	0.230618	-2.30623	-2.60569	0.194192	1.06291	0.9075	NA	NA	NA	NA	NA	NA	NA
chr1_10817400_10818000	0.71047	0.0405495	0.0703104	0.094825	-2.84893	-2.14304	0.254867	1.3768	1.17411	NA	NA	NA	NA	NA	NA	NA
chr1_1081800_1082400	0.503109	0.0402738	0.0438065	0.121643	-2.08843	-1.73717	0.181146	1.00786	0.853139	NA	NA	NA	NA	NA	NA	NA
chr1_10818600_10819200	0.306388	0.0246582	0.000597	-0.215883	-3.02387	-3.99503	0.210215	1.32991	1.13454	NA	NA	NA	NA	NA	NA	NA
chr1_10819800_10820400	0.892352	0.00204443	0.001742	0.0270167	-4.35472	-3.76855	0.199238	1.38305	1.1781	NA	NA	NA	NA	NA	NA	NA
chr1_108199200_108199800	0.892902	0.0230327	0.834268	-0.0365543	-2.97209	-0.231391	0.270968	1.29178	1.10364	NA	NA	NA	NA	NA	NA	NA
chr1_108199800_108200400	0.931272	0.000299071	0.0832855	-0.0133462	-3.52437	-1.40121	0.154443	0.947739	0.802682	NA	NA	NA	NA	NA	NA	NA
chr1_108200400_108201000	0.307694	0.00241572	0.00795919	-0.187257	-3.30874	-2.462	0.182835	1.06882	0.913072	NA	NA	NA	NA	NA	NA	NA
chr1_10820400_10821000	0.157449	0.0122239	0.0536375	0.304454	-2.83322	-1.85727	0.214089	1.11458	0.953504	NA	NA	NA	NA	NA	NA	NA
chr1_108223200_108223800	0.175027	0.0790401	0.0759452	-0.37035	-2.64818	-2.24911	0.271549	1.49572	1.25697	NA	NA	NA	NA	NA	NA	NA
chr1_10822800_10823400	0.0419598	5.91677e-05	0.563546	-0.4705	-5.16096	-0.614466	0.228991	1.24196	1.06107	NA	NA	NA	NA	NA	NA	NA
chr1_108228600_108229200	0.388673	0.211556	0.0155001	-0.221434	-1.69913	-2.83265	0.255996	1.35322	1.15452	NA	NA	NA	NA	NA	NA	NA
chr1_1082400_1083000	0.220277	0.000591666	0.755821	0.199182	-2.79268	0.212934	0.161693	0.792503	0.683261	0.00617981	0.52015	-3.00562	1.04638	-2.8724	0.00941588	0.00135653
chr1_10824600_10825200	0.485282	0.389412	0.431701	-0.154846	-0.724177	0.570369	0.221246	0.838518	0.72309	0.143831	0.353169	-1.29455	1.10724	-1.16917	0.256082	0.0183824
chr1_10825200_10825800	0.964409	0.0811903	0.34781	0.0101944	-1.84501	-0.837999	0.228013	1.04962	0.889282	NA	NA	NA	NA	NA	NA	NA
chr1_10825800_10826400	0.421068	0.0218803	0.0458788	0.146155	-2.32168	-1.70472	0.181067	1.00031	0.845482	NA	NA	NA	NA	NA	NA	NA
chr1_10827000_10827600	0.875024	0.00413923	0.0360604	0.0306495	-3.18582	-1.9699	0.194481	1.09095	0.929764	NA	NA	NA	NA	NA	NA	NA
chr1_10827600_10828200	0.910652	0.00624664	0.0546744	-0.0240216	-3.10692	-1.85456	0.21364	1.11726	0.956282	NA	NA	NA	NA	NA	NA	NA
chr1_10828200_10828800	0.648784	9.85194e-06	0.294858	0.0850495	-4.88983	-0.954304	0.186293	1.06176	0.907253	NA	NA	NA	NA	NA	NA	NA
chr1_10828800_10829400	0.776029	0.01989	0.736339	0.0776207	-3.10515	-0.379707	0.272254	1.31676	1.12525	NA	NA	NA	NA	NA	NA	NA
chr1_10829400_10830000	0.798242	0.0299418	0.747054	-0.0684244	-2.65599	-0.334971	0.267118	1.20974	1.03633	NA	NA	NA	NA	NA	NA	NA
chr1_1083000_1083600	0.613494	0.000592383	0.156586	0.0856417	-3.34354	-1.14283	0.169138	0.948919	0.801948	NA	NA	NA	NA	NA	NA	NA
chr1_10830000_10830600	0.996295	0.0105862	0.00701423	-0.000893841	-2.83702	-2.56061	0.19212	1.09349	0.934299	NA	NA	NA	NA	NA	NA	NA
chr1_10830600_10831200	0.626924	0.00258362	0.575897	-0.114067	-3.46316	-0.539898	0.234106	1.12652	0.962669	NA	NA	NA	NA	NA	NA	NA
chr1_10831200_10831800	0.260431	0.00125304	0.904157	-0.282626	-3.86716	0.121099	0.250021	1.17172	1.0037	0.00778486	0.570154	-3.98826	1.54284	-2.58502	0.0176905	0.00216501
chr1_10834800_10835400	0.0617844	0.0652345	0.000316892	0.415925	-2.58525	-4.38622	0.220712	1.39012	1.18468	NA	NA	NA	NA	NA	NA	NA
chr1_10835400_10836000	0.601523	0.253499	9.28301e-05	0.118033	-1.52467	-4.57683	0.22546	1.32917	1.13363	NA	NA	NA	NA	NA	NA	NA
chr1_1083600_1084200	0.931888	9.37524e-05	0.0857692	-0.0157524	-4.31939	-1.58423	0.183939	1.07056	0.914893	NA	NA	NA	NA	NA	NA	NA
chr1_10836000_10836600	0.401065	0.0658228	0.000730886	-0.173116	-2.16979	-3.46179	0.205468	1.16931	0.999944	NA	NA	NA	NA	NA	NA	NA
chr1_108363600_108364200	0.664802	0.0133401	1.16919e-05	-0.0681536	-2.69874	-4.1935	0.156925	1.07533	0.91888	NA	NA	NA	NA	NA	NA	NA
chr1_108364200_108364800	0.773131	0.00733559	0.00156178	-0.0539171	-3.09517	-3.13985	0.186631	1.13582	0.971261	NA	NA	NA	NA	NA	NA	NA
chr1_10836600_10837200	0.0359975	0.759984	0.000109158	0.446429	-0.340105	-3.787	0.210636	1.11088	0.948113	NA	NA	NA	NA	NA	NA	NA
chr1_108366000_108366600	0.116567	0.0244406	0.0378046	-0.365529	-2.70801	-2.13554	0.231332	1.18915	1.01746	NA	NA	NA	NA	NA	NA	NA
chr1_10837200_10837800	0.0336447	0.720746	0.00374716	0.419152	-0.351218	-2.45137	0.195175	0.980354	0.830068	NA	NA	NA	NA	NA	NA	NA
chr1_10837800_10838400	0.237041	0.0274797	0.00497145	0.205133	-2.19289	-2.37528	0.172669	0.983217	0.830873	NA	NA	NA	NA	NA	NA	NA
chr1_10838400_10839000	0.468237	0.00220499	0.148682	0.117244	-2.82592	-1.11613	0.161153	0.90437	0.768143	NA	NA	NA	NA	NA	NA	NA
chr1_10839600_10840200	0.791627	0.0678228	0.0030568	0.0615798	-2.44259	-3.41896	0.232591	1.32614	1.13214	NA	NA	NA	NA	NA	NA	NA
chr1_10841400_10842000	0.800417	0.00109808	0.0416503	0.0584969	-4.6992	-2.4463	0.230905	1.40674	1.18878	NA	NA	NA	NA	NA	NA	NA
chr1_1084200_1084800	0.570667	0.00166562	0.250565	0.113145	-3.32944	-1.015	0.199008	1.03631	0.879362	NA	NA	NA	NA	NA	NA	NA
chr1_1084800_1085400	0.441276	0.00192731	0.55147	0.111549	-2.32991	-0.379987	0.144408	0.735636	0.636335	NA	NA	NA	NA	NA	NA	NA
chr1_108486000_108486600	0.943542	5.56589e-05	0.000181985	-0.0129162	-2.88277	2.31658	0.182023	0.691086	0.60074	0.00331231	0.010643	-5.19935	0.915691	-5.67807	1.47735e-05	3.51587e-05
chr1_108486600_108487200	0.480889	0.150441	5.6448e-08	0.122066	-0.703467	2.47711	0.172665	0.486256	0.429112	0.0657459	0.00535701	-3.18058	0.648523	-4.90434	8.56626e-05	8.41998e-05
chr1_108487200_108487800	0.669211	0.644544	0.0553506	-0.082855	0.288444	1.05148	0.193484	0.623722	0.543716	0.229341	0.0867921	-0.763034	0.827439	-0.922163	0.367435	0.0255429
chr1_108490200_108490800	0.417522	0.000407475	0.0205947	-0.157306	-4.28948	-2.36713	0.193398	1.18125	1.00959	NA	NA	NA	NA	NA	NA	NA
chr1_10849200_10849800	0.408269	0.0354568	0.000304387	-0.174051	-2.86048	-4.25889	0.209779	1.34562	1.14678	NA	NA	NA	NA	NA	NA	NA
chr1_10849800_10850400	0.236529	0.00220151	0.0847824	-0.283358	-4.30158	-2.03975	0.238252	1.3764	1.17419	NA	NA	NA	NA	NA	NA	NA
chr1_10850400_10851000	0.360812	0.00289244	0.0180342	-0.214432	-4.4278	-2.92768	0.233808	1.45756	1.22193	NA	NA	NA	NA	NA	NA	NA
chr1_10851000_10851600	0.973007	9.88151e-05	0.89844	-0.00804802	-4.74475	0.129067	0.237379	1.18006	1.00923	0.00375163	0.568624	-4.87382	1.55277	-3.1388	0.0051689	0.000868482
chr1_10851600_10852200	0.597076	0.000624647	0.227384	0.112907	-3.94777	-1.16804	0.213055	1.12534	0.962947	NA	NA	NA	NA	NA	NA	NA
chr1_108520200_108520800	0.520013	0.0192864	0.0469205	-0.155566	-3.13896	-2.26847	0.241143	1.3244	1.13054	NA	NA	NA	NA	NA	NA	NA
chr1_108520800_108521400	0.620536	0.0581039	0.0547506	-0.124532	-2.57153	-2.22434	0.250918	1.34482	1.14732	NA	NA	NA	NA	NA	NA	NA
chr1_10852200_10852800	0.407264	0.0100348	0.0780267	0.184036	-3.00264	-1.74693	0.221337	1.14877	0.983303	NA	NA	NA	NA	NA	NA	NA
chr1_10852800_10853400	0.354664	0.00576052	0.193383	0.245076	-4.18135	-1.64297	0.263815	1.48873	1.25652	NA	NA	NA	NA	NA	NA	NA
chr1_108535800_108536400	0.860847	0.00413004	0.0193722	0.0361693	-3.47567	-2.40897	0.205915	1.1899	1.01713	NA	NA	NA	NA	NA	NA	NA
chr1_108536400_108537000	0.924632	0.00212714	0.158158	-0.0174407	-3.11703	-1.19358	0.183997	0.993912	0.84076	NA	NA	NA	NA	NA	NA	NA
chr1_1085400_1086000	0.738421	0.00111544	0.472407	0.0544451	-2.93964	-0.543032	0.16268	0.881255	0.75346	NA	NA	NA	NA	NA	NA	NA
chr1_108559800_108560400	0.78503	0.000682836	0.00538067	-0.0594774	-5.1638	-3.47702	0.217589	1.483	1.22778	NA	NA	NA	NA	NA	NA	NA
chr1_10856400_10857000	0.811141	0.000910942	0.125371	-0.0516908	-3.98092	-1.54673	0.215872	1.17202	1.00257	NA	NA	NA	NA	NA	NA	NA
chr1_10857000_10857600	0.771732	0.129114	0.00111517	0.0502033	-1.52996	-2.82323	0.17268	1.00159	0.846337	NA	NA	NA	NA	NA	NA	NA
chr1_10857600_10858200	0.152498	0.0185401	4.77055e-05	0.265883	-3.04841	-4.59078	0.18472	1.27798	1.09014	NA	NA	NA	NA	NA	NA	NA
chr1_10858200_10858800	0.140054	0.299743	0.000853409	0.338231	-1.2584	-3.52966	0.227785	1.20857	1.03325	NA	NA	NA	NA	NA	NA	NA
chr1_1086000_1086600	0.409783	0.0150325	0.00993821	0.155127	-2.62339	-2.3672	0.187576	1.06422	0.904449	NA	NA	NA	NA	NA	NA	NA
chr1_10860000_10860600	0.351714	0.352597	0.00446374	0.236603	-1.23603	-3.27515	0.253132	1.32481	1.1313	NA	NA	NA	NA	NA	NA	NA
chr1_10860600_10861200	0.793729	0.276434	0.118976	-0.0482432	-0.959822	-1.17724	0.184119	0.878105	0.749992	NA	NA	NA	NA	NA	NA	NA
chr1_10861200_10861800	0.588948	0.000863983	0.169442	-0.122719	-4.28142	-1.48135	0.22653	1.25466	1.072	NA	NA	NA	NA	NA	NA	NA
chr1_10861800_10862400	0.128267	0.0266574	0.09466	0.387148	-2.97436	-1.90705	0.252882	1.32633	1.13254	NA	NA	NA	NA	NA	NA	NA
chr1_10862400_10863000	0.578075	0.0672561	0.421928	0.164264	-2.68518	-0.999858	0.294573	1.4548	1.241	NA	NA	NA	NA	NA	NA	NA
chr1_10863000_10863600	0.433992	0.00918129	0.521321	0.150406	-2.47612	-0.510322	0.191632	0.935904	0.793541	NA	NA	NA	NA	NA	NA	NA
chr1_10863600_10864200	0.910647	0.995562	0.304977	-0.0376616	-0.00788955	-1.24716	0.33493	1.41568	1.21086	NA	NA	NA	NA	NA	NA	NA
chr1_108640200_108640800	0.00600077	0.0625777	0.647404	0.719487	-1.98014	0.410172	0.25745	1.05401	0.894672	0.037478	0.471056	-2.39031	1.38252	-1.72895	0.0992248	0.0082583
chr1_108640800_108641400	0.118949	0.405657	0.192108	0.292886	-0.705368	-0.952069	0.186577	0.845424	0.72603	NA	NA	NA	NA	NA	NA	NA
chr1_108646200_108646800	0.769779	0.0489867	0.209935	-0.079629	-2.7871	-1.50737	0.271503	1.40213	1.19622	NA	NA	NA	NA	NA	NA	NA
chr1_108646800_108647400	0.459822	0.121682	0.753536	-0.193022	-1.63764	0.281892	0.260351	1.05101	0.895864	0.0565943	0.519284	-1.91954	1.38102	-1.38995	0.179824	0.0135068
chr1_1086600_1087200	0.902142	0.128117	0.0010992	-0.0227646	-1.56437	-2.89401	0.184775	1.02143	0.866424	NA	NA	NA	NA	NA	NA	NA
chr1_10866000_10866600	0.965215	0.0738656	0.00107211	0.00877987	-1.97774	-3.14201	0.200927	1.09733	0.938552	NA	NA	NA	NA	NA	NA	NA
chr1_108660600_108661200	0.442622	0.0753834	0.217365	0.171686	-1.81409	-1.06311	0.222917	1.01188	0.857549	NA	NA	NA	NA	NA	NA	NA
chr1_108661200_108661800	0.595663	0.00123451	0.636681	0.0854871	-2.50379	0.310372	0.160694	0.757587	0.655509	0.0077536	0.46569	-2.81416	1.00181	-2.80907	0.0108375	0.00150502
chr1_10866600_10867200	0.783836	0.848815	0.0205016	0.0485431	0.152704	-1.6141	0.176582	0.79942	0.687903	0.292217	0.0508021	1.7668	1.05465	1.67525	0.10945	0.00895437
chr1_108667200_108667800	0.517809	0.0284082	0.0032186	0.149304	-3.07753	-3.55382	0.230217	1.38822	1.18338	NA	NA	NA	NA	NA	NA	NA
chr1_108667800_108668400	0.671538	0.0180089	0.00694316	0.0966684	-3.18826	-3.11397	0.227442	1.33039	1.13473	NA	NA	NA	NA	NA	NA	NA
chr1_108670200_108670800	0.865351	0.0106586	0.111027	-0.0423265	-3.56093	-1.88023	0.249111	1.37382	1.17166	NA	NA	NA	NA	NA	NA	NA
chr1_10867200_10867800	0.0541222	0.320456	0.00134768	0.440297	-1.13822	-3.20212	0.226508	1.14116	0.976805	NA	NA	NA	NA	NA	NA	NA
chr1_108675000_108675600	0.60715	0.00529835	0.0156424	-0.108805	-3.44672	-2.54337	0.211098	1.21483	1.03807	NA	NA	NA	NA	NA	NA	NA
chr1_108675600_108676200	0.174163	0.0102822	0.0226067	-0.333301	-3.77364	-2.82165	0.243891	1.44861	1.22248	NA	NA	NA	NA	NA	NA	NA
chr1_10867800_10868400	0.950144	0.00204194	0.0397918	0.0130331	-3.77063	-2.12625	0.20803	1.19739	1.02359	NA	NA	NA	NA	NA	NA	NA
chr1_108681600_108682200	0.134113	1.50085e-06	1.48973e-13	0.381174	2.57956	3.74533	0.252819	0.510874	0.452556	0.00170128	0.00398917	-1.16577	0.682495	-1.7081	0.103094	0.0085215
chr1_10868400_10869000	0.183069	0.0622887	0.0181026	-0.321822	-2.46498	-2.68086	0.240406	1.31061	1.11959	NA	NA	NA	NA	NA	NA	NA
chr1_108691800_108692400	0.989988	0.00932646	0.0957109	0.00261549	-2.78037	-1.50817	0.20802	1.05313	0.898539	NA	NA	NA	NA	NA	NA	NA
chr1_108692400_108693000	0.379541	0.0110096	0.598453	-0.176976	-2.34432	0.411005	0.200695	0.908573	0.778489	0.0170044	0.446855	-2.75533	1.19647	-2.30287	0.0321553	0.00340923
chr1_108693000_108693600	0.697132	0.0143534	0.0419414	-0.094783	-3.36316	-2.37596	0.242986	1.3548	1.15627	NA	NA	NA	NA	NA	NA	NA
chr1_10869600_10870200	0.244012	0.25748	0.00109996	-0.290564	-1.6293	-4.01294	0.248252	1.43239	1.20149	NA	NA	NA	NA	NA	NA	NA
chr1_10871400_10872000	0.739676	0.021585	0.0509943	0.0847435	-3.33695	-2.40508	0.254478	1.43445	1.22076	NA	NA	NA	NA	NA	NA	NA
chr1_108714600_108715200	0.143524	0.000963433	0.147301	-0.366098	-4.99717	-1.82163	0.248728	1.47851	1.24939	NA	NA	NA	NA	NA	NA	NA
chr1_1087200_1087800	0.716281	0.000234957	0.133592	-0.0580605	-3.60923	-1.21689	0.1594	0.953326	0.806028	NA	NA	NA	NA	NA	NA	NA
chr1_108720600_108721200	0.217087	0.0279023	0.272861	-0.338017	-3.21884	-1.35717	0.272492	1.44722	1.23237	NA	NA	NA	NA	NA	NA	NA
chr1_108721200_108721800	0.30283	0.0127868	0.678809	-0.273017	-3.23763	-0.454837	0.263892	1.28204	1.09588	NA	NA	NA	NA	NA	NA	NA
chr1_108727200_108727800	0.394316	0.817523	0.0441792	0.215505	-0.25003	-1.87587	0.252137	1.0814	0.922907	NA	NA	NA	NA	NA	NA	NA
chr1_108730200_108730800	0.777145	0.0130429	0.0334717	-0.0668103	-3.2788	-2.39003	0.235543	1.30213	1.11179	NA	NA	NA	NA	NA	NA	NA
chr1_10873800_10874400	0.309217	0.0266288	0.461306	-0.287045	-3.1176	-0.87777	0.281155	1.38993	1.18788	NA	NA	NA	NA	NA	NA	NA
chr1_10874400_10875000	0.11668	0.00134445	0.000513177	-0.269417	-3.93659	-3.65566	0.170559	1.20059	1.02539	NA	NA	NA	NA	NA	NA	NA
chr1_108746400_108747000	0.991668	0.000124907	0.541102	-0.00195839	-3.94281	-0.516243	0.187166	0.996117	0.84243	NA	NA	NA	NA	NA	NA	NA
chr1_108747000_108747600	0.73954	2.29283e-05	0.426646	0.0598077	-4.43294	-0.680195	0.1795	1.00813	0.852906	NA	NA	NA	NA	NA	NA	NA
chr1_10875000_10875600	0.100082	0.354085	1.05966e-05	-0.258733	-0.886407	-3.69438	0.15619	0.953029	0.805279	NA	NA	NA	NA	NA	NA	NA
chr1_10877400_10878000	0.47561	0.00165111	0.0181631	0.14302	-3.71392	-2.36377	0.199887	1.155	0.987694	NA	NA	NA	NA	NA	NA	NA
chr1_1087800_1088400	0.241212	2.80202e-05	0.0304123	-0.213895	-5.21114	-2.24098	0.181658	1.19885	1.02368	NA	NA	NA	NA	NA	NA	NA
chr1_10878600_10879200	0.283525	0.0438577	0.345789	-0.268904	-2.36246	-0.940798	0.249682	1.16051	0.994183	NA	NA	NA	NA	NA	NA	NA
chr1_10879200_10879800	0.138279	0.0493879	0.130564	-0.390827	-2.64858	-1.73532	0.262017	1.33484	1.14037	NA	NA	NA	NA	NA	NA	NA
chr1_10880400_10881000	0.671775	0.0187965	0.199253	0.11304	-3.55946	-1.60288	0.266166	1.49555	1.24216	NA	NA	NA	NA	NA	NA	NA
chr1_10881000_10881600	0.288401	0.00311977	0.00944835	-0.233597	-4.15807	-3.09673	0.219114	1.37992	1.17503	NA	NA	NA	NA	NA	NA	NA
chr1_10881600_10882200	0.541412	0.0144976	0.00301213	-0.124947	-2.93999	-3.06641	0.204051	1.18612	1.0138	NA	NA	NA	NA	NA	NA	NA
chr1_108816600_108817200	0.146544	0.329294	0.00221415	0.396322	-0.913557	2.48573	0.27131	0.932872	0.795837	0.123871	0.0195955	-3.39929	1.22622	-2.77218	0.0117577	0.00159352
chr1_108817800_108818400	0.501635	0.00022124	0.00546699	0.138388	-5.60691	-3.45605	0.205371	1.47451	1.22271	NA	NA	NA	NA	NA	NA	NA
chr1_108829800_108830400	0.756107	0.0206367	0.208361	-0.0823561	-3.28219	-1.51118	0.264582	1.40035	1.19507	NA	NA	NA	NA	NA	NA	NA
chr1_108830400_108831000	0.771565	0.0025805	0.139272	0.0741436	-3.23511	1.33084	0.254834	1.05221	0.894488	0.00983053	0.153961	-4.56595	1.38103	-3.30619	0.00352596	0.000664258
chr1_108834000_108834600	0.54045	0.0410687	0.00101621	0.133195	-2.65972	-3.70009	0.217004	1.28874	1.09995	NA	NA	NA	NA	NA	NA	NA
chr1_1088400_1089000	0.635631	0.206472	0.0221484	-0.0910078	-1.23542	-1.90644	0.191612	0.972923	0.823094	NA	NA	NA	NA	NA	NA	NA
chr1_10884600_10885200	0.955102	0.10699	0.00465574	-0.01398	-2.29872	-3.4424	0.247818	1.41603	1.19491	NA	NA	NA	NA	NA	NA	NA
chr1_108846000_108846600	0.839712	0.0365642	0.275883	0.0591886	-2.52594	1.12166	0.292036	1.19548	1.02499	0.0284768	0.251987	-3.64761	1.57473	-2.31633	0.0312692	0.00333428
chr1_10885200_10885800	0.772001	0.0448879	0.0254538	-0.0722144	-2.7382	-2.60771	0.248692	1.35173	1.15331	NA	NA	NA	NA	NA	NA	NA
chr1_108876000_108876600	0.18377	0.00449612	0.0301235	0.324582	-4.29205	-2.70628	0.242859	1.4838	1.23403	NA	NA	NA	NA	NA	NA	NA
chr1_108876600_108877200	0.639771	0.00269893	0.082684	0.0981771	-3.3478	-1.63734	0.209269	1.09399	0.936095	NA	NA	NA	NA	NA	NA	NA
chr1_108877200_108877800	0.405719	0.0115385	0.211221	-0.219885	-3.60819	-1.50925	0.263581	1.40774	1.20111	NA	NA	NA	NA	NA	NA	NA
chr1_108879000_108879600	0.173451	0.014192	0.0164433	0.332876	-3.58585	-2.98887	0.243174	1.44205	1.22938	NA	NA	NA	NA	NA	NA	NA
chr1_108879600_108880200	0.653029	0.00987466	0.0563833	0.114299	-3.88344	-2.3869	0.253646	1.48246	1.23954	NA	NA	NA	NA	NA	NA	NA
chr1_10888800_10889400	0.494381	0.251192	0.0865847	0.133078	-1.07887	-1.3729	0.19418	0.935947	0.794934	NA	NA	NA	NA	NA	NA	NA
chr1_10889400_10890000	0.0322719	0.0461353	0.063117	0.435907	-2.04364	-1.61024	0.201363	1.01479	0.858893	NA	NA	NA	NA	NA	NA	NA
chr1_1089000_1089600	0.968922	0.262572	0.1115	-0.00775536	-1.06947	-1.29323	0.198665	0.950365	0.806948	NA	NA	NA	NA	NA	NA	NA
chr1_10890000_10890600	0.275901	0.000311476	0.0286571	0.23766	-5.36391	-2.69669	0.217184	1.44685	1.21837	NA	NA	NA	NA	NA	NA	NA
chr1_10890600_10891200	0.98349	0.00869419	0.0851601	0.00508551	-3.64543	-2.0245	0.24527	1.36783	1.16684	NA	NA	NA	NA	NA	NA	NA
chr1_108906600_108907200	0.383631	0.0293543	0.0388823	0.248777	-3.42841	-2.68425	0.284561	1.55583	1.28615	NA	NA	NA	NA	NA	NA	NA
chr1_108908400_108909000	0.0382094	0.0216915	0.103248	0.568381	-3.57294	-2.0881	0.271381	1.53716	1.27238	NA	NA	NA	NA	NA	NA	NA
chr1_10891800_10892400	0.601267	0.16037	0.0528084	0.139438	-1.97994	-2.3374	0.266158	1.40215	1.19576	NA	NA	NA	NA	NA	NA	NA
chr1_108936600_108937200	0.113728	0.655527	0.00310264	0.443828	-0.680684	-3.85331	0.278678	1.52227	1.27802	NA	NA	NA	NA	NA	NA	NA
chr1_1089600_1090200	0.231656	0.0350709	0.301276	-0.188699	-1.63799	-0.689183	0.157007	0.768893	0.664003	NA	NA	NA	NA	NA	NA	NA
chr1_108963000_108963600	0.868196	0.00221846	0.756353	-0.031433	-2.92289	-0.246618	0.189029	0.935983	0.793127	NA	NA	NA	NA	NA	NA	NA
chr1_10897800_10898400	0.72354	0.018189	0.0239423	-0.08434	-3.13868	-2.55907	0.237902	1.31179	1.11972	NA	NA	NA	NA	NA	NA	NA
chr1_10898400_10899000	0.728862	0.0264534	0.0780827	-0.0791137	-2.51543	-1.70364	0.227728	1.12014	0.95912	NA	NA	NA	NA	NA	NA	NA
chr1_108993600_108994200	0.0479362	0.0402814	0.34376	0.633304	-3.53519	-1.36956	0.317093	1.70613	1.44118	NA	NA	NA	NA	NA	NA	NA
chr1_108994200_108994800	0.0851166	0.0314644	0.374139	0.551774	-3.72517	-1.29769	0.317977	1.71256	1.45499	NA	NA	NA	NA	NA	NA	NA
chr1_10899600_10900200	0.369066	0.000654558	0.0211197	0.181613	-4.26842	-2.43526	0.201473	1.22151	1.04302	NA	NA	NA	NA	NA	NA	NA
chr1_108999600_109000200	0.138072	0.3167	0.457029	0.510915	-1.58293	-0.995547	0.342345	1.57471	1.33447	NA	NA	NA	NA	NA	NA	NA
chr1_10900200_10900800	0.385913	0.0434669	0.886895	0.191223	-1.99118	-0.117887	0.219785	0.976286	0.827157	NA	NA	NA	NA	NA	NA	NA
chr1_10900800_10901400	0.120762	0.113528	0.424495	-0.342829	-1.58213	-0.673271	0.219474	0.992856	0.8403	NA	NA	NA	NA	NA	NA	NA
chr1_109011000_109011600	0.641309	0.046005	0.299185	-0.143741	-3.15197	-1.34854	0.307805	1.56419	1.29364	NA	NA	NA	NA	NA	NA	NA
chr1_10901400_10902000	0.173007	0.00285257	0.14935	-0.227851	-2.14115	0.886	0.166278	0.70379	0.610776	0.0101997	0.161573	-3.02715	0.931862	-3.2485	0.00402449	0.000726249
chr1_1090200_1090800	0.13053	0.0303007	0.0738329	-0.185362	-1.35623	-0.969376	0.121801	0.619103	0.53779	NA	NA	NA	NA	NA	NA	NA
chr1_10902000_10902600	0.622516	0.000919419	0.123921	0.0920239	-3.52522	-1.36337	0.186475	1.0387	0.880288	NA	NA	NA	NA	NA	NA	NA
chr1_10902600_10903200	0.869764	0.00560939	0.171298	-0.0334282	-2.99704	-1.24041	0.20347	1.06362	0.901581	NA	NA	NA	NA	NA	NA	NA
chr1_109029000_109029600	0.142551	0.14506	0.00412635	0.401838	-2.31787	-3.81652	0.272341	1.58086	1.30646	NA	NA	NA	NA	NA	NA	NA
chr1_10903200_10903800	0.208939	0.00439291	0.135941	0.321367	-4.30226	-1.86672	0.254469	1.48334	1.24399	NA	NA	NA	NA	NA	NA	NA
chr1_109032600_109033200	0.0169112	0.0740613	0.199961	0.723509	-2.75717	-1.63105	0.298906	1.53085	1.26599	NA	NA	NA	NA	NA	NA	NA
chr1_109036800_109037400	0.0934587	0.0608423	0.213857	0.44851	-2.55168	-1.43872	0.265374	1.34908	1.15164	NA	NA	NA	NA	NA	NA	NA
chr1_10903800_10904400	0.75664	0.0300087	0.0604306	0.0587138	-2.15611	-1.57416	0.189055	0.982461	0.830911	NA	NA	NA	NA	NA	NA	NA
chr1_109041000_109041600	0.881651	0.0469796	0.000780347	-0.0289132	-2.28707	-3.35768	0.19382	1.14012	0.975321	NA	NA	NA	NA	NA	NA	NA
chr1_109041600_109042200	0.950682	0.0132368	0.00693393	0.0117471	-2.7714	-2.57808	0.189555	1.10302	0.939297	NA	NA	NA	NA	NA	NA	NA
chr1_109042800_109043400	0.644499	0.0906164	0.466142	-0.138835	-2.51408	-0.918356	0.300172	1.47444	1.25635	NA	NA	NA	NA	NA	NA	NA
chr1_10904400_10905000	0.244871	0.271999	0.00944494	0.199376	-0.978328	-1.99699	0.170654	0.886764	0.757708	NA	NA	NA	NA	NA	NA	NA
chr1_109052400_109053000	0.141317	0.000590291	0.00522501	-0.304271	-4.93936	-3.37841	0.205573	1.40141	1.18877	NA	NA	NA	NA	NA	NA	NA
chr1_109053000_109053600	0.0463992	0.00142281	0.0265959	-0.396733	-3.67243	-2.16149	0.197244	1.12599	0.963449	NA	NA	NA	NA	NA	NA	NA
chr1_109060200_109060800	0.702446	0.123245	0.417337	0.113864	-2.23541	-1.00044	0.297385	1.44072	1.2295	NA	NA	NA	NA	NA	NA	NA
chr1_109060800_109061400	0.550338	0.0974083	0.317595	0.173531	-2.4119	-1.2366	0.289773	1.44438	1.23247	NA	NA	NA	NA	NA	NA	NA
chr1_10906200_10906800	0.0651048	0.132156	0.0217591	0.482453	-2.07723	-2.71787	0.259294	1.37076	1.16991	NA	NA	NA	NA	NA	NA	NA
chr1_109066800_109067400	0.201072	0.027873	0.636602	-0.388811	-3.45832	-0.613143	0.302539	1.55459	1.29466	NA	NA	NA	NA	NA	NA	NA
chr1_109072800_109073400	0.644826	0.0215271	0.0113603	0.107521	-3.06659	-2.88921	0.232699	1.31763	1.12473	NA	NA	NA	NA	NA	NA	NA
chr1_109073400_109074000	0.0747566	0.00828443	0.0104664	0.349897	-2.97336	-2.46207	0.194744	1.10853	0.947465	NA	NA	NA	NA	NA	NA	NA
chr1_109075800_109076400	0.443026	0.632115	0.0132543	-0.211427	-0.457223	2.0413	0.27476	0.952726	0.812594	0.225255	0.0410902	-2.49852	1.2522	-1.99531	0.0598125	0.00550229
chr1_109076400_109077000	0.704823	0.00616413	0.0716433	0.083772	-3.24179	-1.80927	0.220643	1.16384	0.996001	NA	NA	NA	NA	NA	NA	NA
chr1_1090800_1091400	0.556385	0.00741914	0.00138941	0.100642	-2.89561	-2.96002	0.170644	1.06414	0.905534	NA	NA	NA	NA	NA	NA	NA
chr1_109081800_109082400	0.985135	0.120741	0.125754	-0.00527141	-2.26248	-1.90535	0.282375	1.44832	1.23628	NA	NA	NA	NA	NA	NA	NA
chr1_109083000_109083600	0.0771019	0.00419337	0.024543	-0.459951	-4.41837	-2.84947	0.258079	1.51527	1.25218	NA	NA	NA	NA	NA	NA	NA
chr1_10908600_10909200	0.192157	0.00282431	0.0512473	-0.304862	-4.122	-2.2715	0.232508	1.35346	1.15423	NA	NA	NA	NA	NA	NA	NA
chr1_109086600_109087200	0.851282	0.015962	0.0171492	0.0450393	-3.43651	-2.89365	0.239743	1.40699	1.1981	NA	NA	NA	NA	NA	NA	NA
chr1_109087200_109087800	0.965005	0.0356973	0.38415	-0.0121227	-2.87608	-1.0113	0.275765	1.35477	1.15803	NA	NA	NA	NA	NA	NA	NA
chr1_109089000_109089600	0.191692	0.126991	0.20643	-0.354581	-2.01576	-1.42373	0.270142	1.31223	1.12111	NA	NA	NA	NA	NA	NA	NA
chr1_109089600_109090200	0.490654	0.0655551	0.00531696	-0.172968	-2.76386	-3.51185	0.250217	1.48795	1.23831	NA	NA	NA	NA	NA	NA	NA
chr1_109090200_109090800	0.643702	0.00412118	0.481303	0.0908499	-2.89465	-0.591787	0.195951	0.99075	0.837886	NA	NA	NA	NA	NA	NA	NA
chr1_109090800_109091400	0.839591	0.00885544	0.00118084	0.0410977	-3.46606	-3.69067	0.20262	1.30372	1.11216	NA	NA	NA	NA	NA	NA	NA
chr1_10909200_10909800	0.532722	0.338293	0.0282445	-0.109949	-0.839772	-1.65437	0.17576	0.873702	0.745469	NA	NA	NA	NA	NA	NA	NA
chr1_109093800_109094400	0.588083	0.000171122	0.585205	-0.129672	-4.92779	-0.594588	0.238809	1.27234	1.08661	NA	NA	NA	NA	NA	NA	NA
chr1_109094400_109095000	0.373242	0.194594	0.639791	-0.234521	-1.36994	0.419335	0.262455	1.05058	0.893887	0.0799063	0.467118	-1.78928	1.3794	-1.29714	0.209348	0.0153868
chr1_10909800_10910400	0.958449	0.216349	0.0329429	0.00907969	-1.11183	-1.64684	0.17393	0.894851	0.763736	NA	NA	NA	NA	NA	NA	NA
chr1_109099200_109099800	0.580692	0.0141268	0.411601	-0.133909	-2.8251	-0.801171	0.241803	1.13533	0.972541	NA	NA	NA	NA	NA	NA	NA
chr1_109099800_109100400	0.240031	0.00373031	0.699285	0.283944	-3.13406	0.349118	0.240542	1.0607	0.901741	0.0112545	0.495445	-3.48318	1.3922	-2.50192	0.0211467	0.00247903
chr1_109100400_109101000	0.419803	0.00019173	0.91888	0.186099	-4.30298	-0.097885	0.229925	1.12	0.959209	NA	NA	NA	NA	NA	NA	NA
chr1_109101000_109101600	0.16272	0.00333116	0.185736	-0.36562	-4.46325	-1.66299	0.260391	1.49179	1.24991	NA	NA	NA	NA	NA	NA	NA
chr1_10910400_10911000	0.0137426	0.0557211	0.276906	0.535147	-1.95394	-0.934882	0.214176	1.01193	0.856132	NA	NA	NA	NA	NA	NA	NA
chr1_109104000_109104600	0.146862	0.0409917	0.0389682	0.282183	-2.06144	-1.76211	0.193327	0.99846	0.844691	NA	NA	NA	NA	NA	NA	NA
chr1_109104600_109105200	0.615452	0.019448	0.927596	-0.114423	-2.34305	-0.076373	0.227235	0.989934	0.838797	NA	NA	NA	NA	NA	NA	NA
chr1_109109400_109110000	0.501628	0.0455177	0.742431	0.206873	-3.05042	-0.418897	0.307	1.51034	1.27188	NA	NA	NA	NA	NA	NA	NA
chr1_10911000_10911600	0.813656	0.0196143	0.038373	0.0494442	-2.62038	-1.97859	0.20933	1.10865	0.945517	NA	NA	NA	NA	NA	NA	NA
chr1_109110000_109110600	0.265353	0.0262091	0.468931	0.32547	-3.45109	-0.938164	0.290921	1.53425	1.29153	NA	NA	NA	NA	NA	NA	NA
chr1_109110600_109111200	0.106012	0.288984	0.114964	-0.441101	-1.40734	-1.79166	0.270956	1.3217	1.12886	NA	NA	NA	NA	NA	NA	NA
chr1_109112400_109113000	0.34479	0.0153321	0.00335447	0.200313	-3.0947	-3.21477	0.21124	1.25921	1.07531	NA	NA	NA	NA	NA	NA	NA
chr1_109113000_109113600	0.513681	0.0106567	0.0345387	-0.113488	-2.54382	-1.77325	0.173277	0.98139	0.829905	NA	NA	NA	NA	NA	NA	NA
chr1_109113600_109114200	0.316498	0.00562648	0.048842	-0.146192	-2.44728	-1.4816	0.145371	0.868837	0.744879	NA	NA	NA	NA	NA	NA	NA
chr1_109114200_109114800	0.190249	0.0424512	0.00192366	-0.21615	-2.03471	-2.65859	0.164139	0.992693	0.839254	NA	NA	NA	NA	NA	NA	NA
chr1_10911600_10912200	0.813556	0.0545947	0.0107599	-0.0553494	-2.46278	-2.80804	0.234203	1.26948	1.08479	NA	NA	NA	NA	NA	NA	NA
chr1_109116600_109117200	0.0584703	0.0712891	0.418406	-0.547866	-2.61119	-0.991464	0.286939	1.43563	1.22127	NA	NA	NA	NA	NA	NA	NA
chr1_109121400_109122000	0.225831	0.0245215	0.467395	-0.359525	-3.60175	-0.954177	0.295402	1.58252	1.30904	NA	NA	NA	NA	NA	NA	NA
chr1_10912200_10912800	0.395509	0.252149	0.000322021	-0.17614	-1.27334	-3.50337	0.206602	1.10689	0.94738	NA	NA	NA	NA	NA	NA	NA
chr1_109126200_109126800	0.698832	0.00150737	0.0364158	0.0840883	-4.16417	-2.31644	0.216849	1.28376	1.09545	NA	NA	NA	NA	NA	NA	NA
chr1_109126800_109127400	0.364939	0.00506602	0.0173495	0.207262	-3.90208	-2.81155	0.227949	1.368	1.16625	NA	NA	NA	NA	NA	NA	NA
chr1_10913400_10914000	0.768859	0.00105307	0.167915	0.0709535	-4.60943	-1.62222	0.240932	1.37467	1.16972	NA	NA	NA	NA	NA	NA	NA
chr1_1091400_1092000	0.111995	0.0151796	0.00371277	0.357679	-3.35174	-3.43279	0.223496	1.36171	1.1612	NA	NA	NA	NA	NA	NA	NA
chr1_109149600_109150200	0.494427	0.0801697	0.177132	0.154674	-1.8502	-1.20586	0.225716	1.04899	0.888515	NA	NA	NA	NA	NA	NA	NA
chr1_109150200_109150800	0.860113	0.133706	0.204048	0.0417629	-1.59666	-1.14679	0.236499	1.05789	0.898269	NA	NA	NA	NA	NA	NA	NA
chr1_109150800_109151400	0.834262	0.0233342	0.650793	-0.0595005	-3.30247	-0.555267	0.283783	1.43859	1.22377	NA	NA	NA	NA	NA	NA	NA
chr1_109151400_109152000	0.190246	0.0729174	0.230293	-0.355281	-2.50319	-1.42356	0.269789	1.38425	1.181	NA	NA	NA	NA	NA	NA	NA
chr1_109152000_109152600	0.658275	0.484543	0.137807	-0.142239	-1.07805	-1.903	0.320837	1.53774	1.27426	NA	NA	NA	NA	NA	NA	NA
chr1_109156800_109157400	0.121048	0.263614	3.15319e-05	-0.452129	-1.05488	3.47523	0.289671	0.939461	0.80502	0.102235	0.0088802	-4.53011	1.23719	-3.66161	0.00154971	0.00037471
chr1_10915800_10916400	0.86533	0.028068	7.52934e-05	-0.0358164	-3.24199	-4.97434	0.210763	1.4592	1.21546	NA	NA	NA	NA	NA	NA	NA
chr1_109164000_109164600	0.753888	0.201639	0.0653906	-0.0753361	-1.41736	-1.75267	0.239775	1.10426	0.942988	NA	NA	NA	NA	NA	NA	NA
chr1_109164600_109165200	0.100862	0.52576	0.0893378	-0.362829	-0.626352	-1.42648	0.219539	0.98445	0.833235	NA	NA	NA	NA	NA	NA	NA
chr1_109165200_109165800	0.465269	0.132573	0.0818087	-0.183693	-1.84016	-1.8244	0.250808	1.21563	1.04003	NA	NA	NA	NA	NA	NA	NA
chr1_109165800_109166400	0.387842	0.193137	0.0634764	-0.248894	-1.99017	-2.3855	0.287237	1.5212	1.27417	NA	NA	NA	NA	NA	NA	NA
chr1_109167000_109167600	0.175173	0.047553	0.00153085	0.318593	-2.88122	-3.90711	0.233679	1.4401	1.20629	NA	NA	NA	NA	NA	NA	NA
chr1_109167600_109168200	0.966246	0.0972846	0.00597411	0.010608	-2.42568	-3.42457	0.250185	1.45209	1.22472	NA	NA	NA	NA	NA	NA	NA
chr1_109171200_109171800	0.270036	0.0526437	0.595342	0.2445	-1.90287	-0.438648	0.220707	0.972778	0.823828	NA	NA	NA	NA	NA	NA	NA
chr1_109171800_109172400	0.272681	0.0350257	0.131717	-0.245045	-2.24142	-1.362	0.222428	1.05188	0.897748	NA	NA	NA	NA	NA	NA	NA
chr1_109180800_109181400	0.28196	0.377846	0.999919	-0.350275	-1.19162	-0.000117587	0.324175	1.34652	1.15161	NA	NA	NA	NA	NA	NA	NA
chr1_109184400_109185000	0.785775	0.00137375	0.0570322	-0.0632761	-4.61058	-2.30173	0.232312	1.40898	1.1985	NA	NA	NA	NA	NA	NA	NA
chr1_109185000_109185600	0.874337	0.0142817	0.0674181	-0.0364278	-2.938	-1.86719	0.229871	1.18264	1.01223	NA	NA	NA	NA	NA	NA	NA
chr1_109192800_109193400	0.0589469	0.0988114	0.16206	0.623608	-2.92567	-2.11023	0.327234	1.75946	1.5005	NA	NA	NA	NA	NA	NA	NA
chr1_109197000_109197600	0.933872	0.00281995	0.433273	-0.021437	-3.38874	0.749178	0.257847	1.11251	0.953034	0.0101573	0.354132	-4.13791	1.46491	-2.82469	0.0104687	0.00146706
chr1_109197600_109198200	0.400425	0.0671692	0.669821	0.199333	-1.89376	-0.371136	0.236263	1.02569	0.868386	NA	NA	NA	NA	NA	NA	NA
chr1_109198200_109198800	0.889166	0.492995	0.74261	0.0374541	-0.744936	-0.30455	0.268219	1.08348	0.925359	NA	NA	NA	NA	NA	NA	NA
chr1_109199400_109200000	0.350939	0.00267759	0.0994992	0.230779	-4.40609	-2.00596	0.246503	1.43862	1.20885	NA	NA	NA	NA	NA	NA	NA
chr1_1092000_1092600	0.60679	0.000526483	0.201391	-0.0821264	-3.23253	-0.989535	0.159177	0.90859	0.770519	NA	NA	NA	NA	NA	NA	NA
chr1_10920000_10920600	0.922355	0.0416053	0.035112	0.0249323	-2.96641	-2.61481	0.255293	1.4412	1.2277	NA	NA	NA	NA	NA	NA	NA
chr1_109200000_109200600	0.515814	0.0247588	0.270734	0.185717	-3.53451	-1.42929	0.285002	1.5556	1.29208	NA	NA	NA	NA	NA	NA	NA
chr1_109213800_109214400	0.941296	0.000579742	0.0569586	-0.0156889	-4.40002	-2.04485	0.212625	1.24654	1.06442	NA	NA	NA	NA	NA	NA	NA
chr1_109214400_109215000	0.458068	2.27166e-06	0.000320916	-0.166282	-4.53634	2.87802	0.223407	0.915758	0.77807	0.0018079	0.0116476	-7.41435	1.20167	-6.17005	4.99616e-06	1.90674e-05
chr1_109219200_109219800	0.0446284	0.0235674	0.663495	0.540391	-2.93091	-0.476744	0.266438	1.27893	1.09317	NA	NA	NA	NA	NA	NA	NA
chr1_109235400_109236000	0.206329	0.0893228	0.0200182	-0.306426	-2.18735	-2.57151	0.24124	1.27761	1.09162	NA	NA	NA	NA	NA	NA	NA
chr1_109239000_109239600	0.363618	0.0118655	0.0558252	-0.213178	-3.18407	-2.05672	0.233808	1.24724	1.06562	NA	NA	NA	NA	NA	NA	NA
chr1_109239600_109240200	0.822835	0.176924	0.174965	-0.0523717	-1.42933	-1.21653	0.233424	1.05266	0.89186	NA	NA	NA	NA	NA	NA	NA
chr1_109240200_109240800	0.291967	0.332148	0.545966	0.223524	0.758538	-0.408984	0.211229	0.779177	0.675515	0.124805	0.418985	1.16752	1.03123	1.13216	0.270958	0.0193269
chr1_109240800_109241400	0.106112	0.116524	0.0101921	0.302736	-1.55804	-2.17399	0.186016	0.985918	0.833526	NA	NA	NA	NA	NA	NA	NA
chr1_109243200_109243800	0.434577	0.104075	0.0604754	-0.175542	-1.78283	-1.75253	0.223944	1.08899	0.925231	NA	NA	NA	NA	NA	NA	NA
chr1_109246200_109246800	0.240183	0.288164	0.133849	0.335064	-1.47935	-1.78709	0.28394	1.38695	1.1845	NA	NA	NA	NA	NA	NA	NA
chr1_109248000_109248600	0.265236	0.0346668	0.00303917	-0.259927	-2.93305	-3.53782	0.232278	1.3737	1.17077	NA	NA	NA	NA	NA	NA	NA
chr1_109248600_109249200	0.6406	0.269781	0.110498	-0.0767129	-0.657526	0.831638	0.163924	0.593221	0.517455	0.104238	0.132104	-1.48916	0.787191	-1.89174	0.0730957	0.00645443
chr1_109249200_109249800	0.769504	0.307223	0.00496077	-0.065848	-0.756699	1.83522	0.224239	0.738111	0.641796	0.116477	0.0266468	-2.59192	0.978116	-2.64991	0.0153693	0.00194927
chr1_109249800_109250400	0.686884	2.29063e-05	0.322025	-0.0668865	-4.31648	-0.824524	0.165557	0.981594	0.829354	NA	NA	NA	NA	NA	NA	NA
chr1_109250400_109251000	0.434754	0.000621904	0.308256	-0.114701	-2.90548	-0.727174	0.146384	0.827926	0.710834	NA	NA	NA	NA	NA	NA	NA
chr1_109251000_109251600	0.766858	0.00446784	0.160403	-0.0531027	-2.79845	-1.15454	0.178723	0.966745	0.817687	NA	NA	NA	NA	NA	NA	NA
chr1_109251600_109252200	0.466611	0.0141119	0.00346471	0.130256	-2.60217	-2.64589	0.178385	1.04557	0.88818	NA	NA	NA	NA	NA	NA	NA
chr1_109252200_109252800	0.650403	0.00452817	0.00192076	0.0822631	-3.2062	-3.00539	0.181085	1.10933	0.948588	NA	NA	NA	NA	NA	NA	NA
chr1_109252800_109253400	0.513917	0.0806555	0.0420509	-0.0978431	-1.39652	-1.40628	0.149473	0.793064	0.684743	NA	NA	NA	NA	NA	NA	NA
chr1_109253400_109254000	0.847786	0.000521448	0.913601	0.0311023	-2.89564	0.0760444	0.161709	0.813264	0.699494	0.00594442	0.572613	-2.97169	1.0727	-2.77028	0.011807	0.00159875
chr1_109254000_109254600	0.0529712	0.497612	0.426591	0.432583	-0.636363	-0.634218	0.221454	0.935548	0.79516	NA	NA	NA	NA	NA	NA	NA
chr1_109254600_109255200	0.00437369	0.165374	9.06237e-05	0.618808	-1.77181	-4.38327	0.213246	1.26989	1.08397	NA	NA	NA	NA	NA	NA	NA
chr1_109255200_109255800	0.434624	0.000617532	0.190838	0.131511	-3.33431	-1.05625	0.16779	0.949566	0.80316	NA	NA	NA	NA	NA	NA	NA
chr1_109255800_109256400	0.776958	0.00473	0.0681987	-0.065519	-3.61376	-1.9746	0.230792	1.25671	1.07354	NA	NA	NA	NA	NA	NA	NA
chr1_109257600_109258200	0.862704	0.343685	0.00853647	0.0433118	-1.20412	-2.89388	0.249948	1.26689	1.08319	NA	NA	NA	NA	NA	NA	NA
chr1_109258200_109258800	0.938377	1.02373e-06	0.804997	0.0121162	-4.66321	0.190822	0.156413	0.907833	0.771306	0.00161031	0.538251	-4.85403	1.19125	-4.07474	0.000590706	0.000201811
chr1_109258800_109259400	0.439979	4.62487e-05	0.985488	0.0983122	-2.82002	-0.0105775	0.12691	0.66838	0.580383	NA	NA	NA	NA	NA	NA	NA
chr1_109259400_109260000	0.617476	0.0164273	0.00297051	0.0966063	-2.74705	-2.92575	0.192958	1.12975	0.96585	NA	NA	NA	NA	NA	NA	NA
chr1_1092600_1093200	0.896646	0.00821362	0.00118391	-0.0226647	-2.95604	-3.11385	0.174131	1.10083	0.938562	NA	NA	NA	NA	NA	NA	NA
chr1_109260600_109261200	0.803226	0.00415839	2.62779e-06	-0.0358793	-3.2529	-4.68643	0.143693	1.11451	0.952572	NA	NA	NA	NA	NA	NA	NA
chr1_109261200_109261800	0.38103	0.0449396	1.33108e-05	-0.138033	-2.1063	-3.99685	0.157024	1.04004	0.881928	NA	NA	NA	NA	NA	NA	NA
chr1_109261800_109262400	0.136223	0.00397124	0.00301794	-0.283783	-3.40352	-2.99993	0.189252	1.16003	0.992019	NA	NA	NA	NA	NA	NA	NA
chr1_109262400_109263000	0.0975584	9.3259e-06	0.256944	-0.341236	-5.5528	-1.1692	0.204444	1.20223	1.02673	NA	NA	NA	NA	NA	NA	NA
chr1_109263000_109263600	0.661182	0.64696	0.12345	0.0849255	0.290748	0.856614	0.193315	0.633327	0.552391	0.230073	0.142253	-0.565866	0.84038	-0.673345	0.508435	0.0346627
chr1_109263600_109264200	0.153593	0.251447	0.200385	0.307029	-1.1353	-1.07519	0.213879	0.985428	0.835333	NA	NA	NA	NA	NA	NA	NA
chr1_109264200_109264800	0.70255	0.590573	0.00330448	0.087781	-0.590386	-2.8016	0.229347	1.09458	0.935576	NA	NA	NA	NA	NA	NA	NA
chr1_109264800_109265400	0.962686	0.027239	0.019336	0.00988741	-2.50528	-2.26916	0.21093	1.1215	0.957811	NA	NA	NA	NA	NA	NA	NA
chr1_109265400_109266000	0.795074	0.755418	0.0198609	-0.0493211	-0.279075	-1.79778	0.189498	0.893968	0.762178	NA	NA	NA	NA	NA	NA	NA
chr1_109266000_109266600	0.803786	0.816773	0.0926037	-0.0531178	0.21015	-1.30528	0.213351	0.905124	0.770272	0.283168	0.117919	1.51543	1.18852	1.27507	0.2169	0.0158765
chr1_109267200_109267800	0.0953819	0.0213986	0.0203818	0.378251	-2.85922	-2.46361	0.225128	1.2273	1.04893	NA	NA	NA	NA	NA	NA	NA
chr1_109267800_109268400	0.203939	0.00961601	0.00121395	0.265748	-3.58671	-3.84925	0.208108	1.36422	1.16289	NA	NA	NA	NA	NA	NA	NA
chr1_109268400_109269000	0.620889	0.160042	0.504331	0.0799079	-1.01272	-0.416255	0.161169	0.716614	0.621653	NA	NA	NA	NA	NA	NA	NA
chr1_109269000_109269600	0.489301	0.0123099	0.293526	0.110427	-2.09628	-0.749715	0.159246	0.825508	0.710778	NA	NA	NA	NA	NA	NA	NA
chr1_109269600_109270200	0.668323	0.0216786	0.174143	0.09294	-2.03945	1.02567	0.216417	0.877332	0.750496	0.0225086	0.180002	-3.06512	1.15454	-2.65485	0.015205	0.00193267
chr1_109270200_109270800	0.252064	0.0533658	0.801839	-0.234156	-1.81572	-0.199424	0.203511	0.931094	0.792963	NA	NA	NA	NA	NA	NA	NA
chr1_109270800_109271400	0.413971	0.0226973	0.236375	-0.119233	-1.67869	-0.749903	0.145475	0.727789	0.630322	NA	NA	NA	NA	NA	NA	NA
chr1_109271400_109272000	0.383333	0.0216283	0.00335261	-0.156659	-2.40625	-2.62069	0.17908	1.03472	0.876549	NA	NA	NA	NA	NA	NA	NA
chr1_109272000_109272600	0.386165	0.241273	0.0315375	-0.19646	-1.25292	-1.97426	0.225923	1.06423	0.908019	NA	NA	NA	NA	NA	NA	NA
chr1_109272600_109273200	0.639787	0.662658	0.00080324	-0.102459	-0.46677	-3.13253	0.218407	1.06747	0.91219	NA	NA	NA	NA	NA	NA	NA
chr1_109273200_109273800	0.704888	0.518322	0.0710487	0.0774029	-0.601858	-1.43398	0.203915	0.929169	0.787726	NA	NA	NA	NA	NA	NA	NA
chr1_109273800_109274400	0.405611	0.590207	0.407227	-0.160654	-0.439515	-0.580978	0.192534	0.814061	0.698677	NA	NA	NA	NA	NA	NA	NA
chr1_109274400_109275000	0.194203	7.91563e-05	6.09365e-32	-0.238468	1.24571	4.36314	0.182715	0.305365	0.274964	0.00359735	0.00184535	-3.11743	0.410917	-7.58651	2.62013e-07	0
chr1_109275000_109275600	0.191093	0.00268999	1.83644e-27	-0.343803	1.29847	5.32853	0.261575	0.424166	0.381313	0.00997345	0.00239691	-4.03006	0.570365	-7.06575	7.50821e-07	1.03729e-06
chr1_109277400_109278000	0.666863	0.00178521	0.08243	-0.101501	-4.30458	-2.01449	0.23525	1.34889	1.15076	NA	NA	NA	NA	NA	NA	NA
chr1_109278000_109278600	0.545555	0.00336356	0.252494	-0.1631	-4.57837	-1.49242	0.269115	1.53189	1.29829	NA	NA	NA	NA	NA	NA	NA
chr1_109280400_109281000	0.460126	0.0190491	0.173367	-0.193105	-3.25018	-1.59933	0.260639	1.36856	1.16812	NA	NA	NA	NA	NA	NA	NA
chr1_109281000_109281600	0.0778379	0.0035818	0.239539	0.432714	-3.82699	-1.30065	0.243407	1.28938	1.10068	NA	NA	NA	NA	NA	NA	NA
chr1_109281600_109282200	0.829382	0.0116905	0.21718	-0.0416855	-2.54182	-1.04189	0.193043	0.993546	0.840087	NA	NA	NA	NA	NA	NA	NA
chr1_109282200_109282800	0.481879	0.119696	0.00841376	0.173151	-2.06314	-3.00978	0.24548	1.31696	1.12441	NA	NA	NA	NA	NA	NA	NA
chr1_109282800_109283400	0.936967	0.0145695	0.0583727	-0.0171835	-2.79576	-1.84261	0.216855	1.12877	0.964666	NA	NA	NA	NA	NA	NA	NA
chr1_109283400_109284000	0.842285	0.00883547	0.0371618	-0.0485047	-3.74886	-2.52589	0.243279	1.40967	1.19932	NA	NA	NA	NA	NA	NA	NA
chr1_10928400_10929000	0.847624	0.00733043	0.101729	0.047159	-3.73561	-1.92654	0.244927	1.37072	1.16869	NA	NA	NA	NA	NA	NA	NA
chr1_10929000_10929600	0.231637	0.0307049	0.0218106	0.275423	-2.6544	-2.41105	0.229157	1.2147	1.03825	NA	NA	NA	NA	NA	NA	NA
chr1_109294200_109294800	0.301529	0.0589596	0.637119	-0.28094	-2.37041	-0.503421	0.270818	1.24392	1.06461	NA	NA	NA	NA	NA	NA	NA
chr1_109294800_109295400	0.960963	0.0558494	0.000100494	0.0105339	-2.73204	-4.80728	0.214797	1.41566	1.19695	NA	NA	NA	NA	NA	NA	NA
chr1_109296000_109296600	0.893476	0.0111619	0.013282	0.0321686	-3.74067	-3.05942	0.239751	1.45256	1.21826	NA	NA	NA	NA	NA	NA	NA
chr1_109296600_109297200	0.295947	0.00049093	2.64077e-22	-0.164947	1.09653	3.25506	0.15717	0.306472	0.274486	0.00583111	0.00330762	-2.15853	0.411422	-5.24652	3.91006e-05	5.935e-05
chr1_109297200_109297800	0.761296	0.608212	0.651071	-0.0684289	-0.436774	0.332057	0.224775	0.849915	0.732455	0.21733	0.47287	-0.768831	1.12198	-0.685243	0.501056	0.0341934
chr1_109297800_109298400	0.983238	0.00371466	0.0101214	-0.00369928	-3.08524	-2.31099	0.175731	1.04369	0.885199	NA	NA	NA	NA	NA	NA	NA
chr1_109298400_109299000	0.497636	0.0883558	0.393571	-0.141307	-1.67089	-0.706433	0.207754	0.972963	0.825207	NA	NA	NA	NA	NA	NA	NA
chr1_109299000_109299600	0.607635	5.19952e-05	0.25628	0.12467	-4.631	1.08025	0.242205	1.10552	0.947293	0.00327214	0.238508	-5.71126	1.45586	-3.92294	0.000842393	0.000251874
chr1_109299600_109300200	0.402649	3.62037e-05	0.780798	0.196179	-4.97416	0.277297	0.233628	1.16169	0.994361	0.00298149	0.529587	-5.25146	1.52914	-3.43426	0.00262536	0.000542631
chr1_109300200_109300800	0.633861	0.000407532	0.288853	0.111071	-4.66832	-1.16915	0.232635	1.28559	1.0977	NA	NA	NA	NA	NA	NA	NA
chr1_109300800_109301400	0.716424	6.88871e-05	0.0282169	0.0731178	-5.53497	-2.5437	0.200845	1.34479	1.146	NA	NA	NA	NA	NA	NA	NA
chr1_109302000_109302600	0.691723	0.314476	0.000996799	0.0985344	-1.42089	-4.02	0.247934	1.40701	1.193	NA	NA	NA	NA	NA	NA	NA
chr1_109306800_109307400	0.62419	0.18919	0.00347933	-0.0925839	-1.3203	-2.52035	0.188517	1.00019	0.84643	NA	NA	NA	NA	NA	NA	NA
chr1_109307400_109308000	0.93225	0.004927	0.0162746	-0.0182099	-3.5484	-2.57857	0.213776	1.23991	1.05891	NA	NA	NA	NA	NA	NA	NA
chr1_109310400_109311000	0.94505	0.146143	0.0456862	-0.018387	-2.1041	-2.4455	0.266247	1.43895	1.21179	NA	NA	NA	NA	NA	NA	NA
chr1_109311000_109311600	0.0791567	0.24811	0.0650537	-0.491752	-1.68597	-2.28673	0.277857	1.45308	1.22877	NA	NA	NA	NA	NA	NA	NA
chr1_109335600_109336200	0.452318	0.00537339	0.0531541	-0.188416	-4.18289	-2.39229	0.24993	1.47679	1.22565	NA	NA	NA	NA	NA	NA	NA
chr1_10934400_10935000	0.223342	0.0028405	0.00357017	-0.26006	-4.19946	-3.49005	0.212526	1.37973	1.17543	NA	NA	NA	NA	NA	NA	NA
chr1_10935000_10935600	0.450127	0.00819776	0.0569055	-0.174064	-3.29011	-2.0122	0.229775	1.22493	1.0472	NA	NA	NA	NA	NA	NA	NA
chr1_109351800_109352400	0.717047	0.0874205	0.155207	-0.104389	-2.62404	-1.8275	0.287403	1.52344	1.27809	NA	NA	NA	NA	NA	NA	NA
chr1_109358400_109359000	0.488841	0.0167895	0.0710237	-0.191149	-3.85675	-2.39464	0.275362	1.59155	1.31533	NA	NA	NA	NA	NA	NA	NA
chr1_109366200_109366800	0.997203	0.0246796	0.294413	0.000996803	-3.47778	-1.3335	0.283756	1.52977	1.26657	NA	NA	NA	NA	NA	NA	NA
chr1_10936800_10937400	0.375574	0.31564	0.548256	0.174105	-0.767659	0.397382	0.195799	0.761994	0.660119	0.119283	0.420338	-1.16504	1.00816	-1.15561	0.261461	0.0187224
chr1_10937400_10938000	0.379242	0.381599	0.00248032	0.128849	0.382744	1.18589	0.146026	0.435927	0.384123	0.141268	0.0203802	-0.803146	0.581019	-1.38231	0.182121	0.0136528
chr1_10938000_10938600	0.919567	0.0389929	1.90752e-05	0.0185366	-2.54868	-4.63413	0.183204	1.2219	1.043	NA	NA	NA	NA	NA	NA	NA
chr1_10938600_10939200	0.350167	0.00677584	0.0798724	-0.139235	-2.30936	-1.26865	0.148483	0.83894	0.71856	NA	NA	NA	NA	NA	NA	NA
chr1_10939200_10939800	0.702334	0.0030736	0.0514873	0.074769	-3.33387	-1.84742	0.195202	1.10461	0.939725	NA	NA	NA	NA	NA	NA	NA
chr1_109392600_109393200	0.902313	0.158388	0.647459	0.035888	-1.69739	0.470196	0.291807	1.19631	1.02577	0.0682723	0.471096	-2.16759	1.57587	-1.37549	0.184192	0.0137908
chr1_109393200_109393800	0.535859	0.825599	0.395191	0.19136	-0.249182	0.824048	0.30826	1.12852	0.965911	0.285708	0.330481	-1.07323	1.48545	-0.722498	0.478353	0.0327086
chr1_109396800_109397400	0.781003	0.0126741	0.0211062	0.0687924	-3.68012	-2.85373	0.24692	1.45538	1.22212	NA	NA	NA	NA	NA	NA	NA
chr1_10939800_10940400	0.570287	0.0236727	0.240463	0.144882	-2.3765	1.03702	0.254577	1.0378	0.879315	0.023375	0.227486	-3.41352	1.36023	-2.50951	0.0208064	0.00244815
chr1_109398000_109398600	0.30311	0.0178826	0.00154761	0.217978	-3.07536	-3.54143	0.210816	1.28183	1.09453	NA	NA	NA	NA	NA	NA	NA
chr1_10940400_10941000	0.917319	0.00917719	0.807447	0.0250853	-2.9023	-0.227618	0.241161	1.09692	0.931985	NA	NA	NA	NA	NA	NA	NA
chr1_10941000_10941600	0.378488	0.293365	0.000129997	0.178976	1.01294	-3.20837	0.202514	0.960011	0.812774	0.11198	0.0101918	4.22132	1.25786	3.35594	0.00314492	0.000613502
chr1_10941600_10942200	0.835523	0.0705375	0.00960769	0.0488896	-2.29189	-2.82355	0.234991	1.25669	1.07382	NA	NA	NA	NA	NA	NA	NA
chr1_10942200_10942800	0.604634	0.121147	0.000445627	0.105325	-1.77589	-3.51137	0.202923	1.13809	0.973833	NA	NA	NA	NA	NA	NA	NA
chr1_109425600_109426200	0.0106031	0.00412231	0.85617	0.6567	-3.3845	0.180207	0.253172	1.15844	0.992217	0.0116956	0.556135	-3.5647	1.52528	-2.33708	0.0299478	0.00322497
chr1_109426200_109426800	0.121353	0.000152948	0.143317	0.280899	-4.05936	-1.29958	0.180116	1.03992	0.88248	NA	NA	NA	NA	NA	NA	NA
chr1_10942800_10943400	0.451091	0.139713	1.06133e-05	0.133591	-1.6439	-4.33674	0.176724	1.10614	0.945376	NA	NA	NA	NA	NA	NA	NA
chr1_10943400_10944000	0.343476	0.105274	0.00270832	-0.225005	-2.15242	-3.44353	0.236631	1.31934	1.12569	NA	NA	NA	NA	NA	NA	NA
chr1_10944000_10944600	0.799617	0.022704	0.000884689	-0.0551268	-3.15698	-3.97149	0.216715	1.36877	1.16625	NA	NA	NA	NA	NA	NA	NA
chr1_10945200_10945800	0.0695062	0.0067975	0.0831481	-0.425541	-3.40986	-1.84941	0.232464	1.23923	1.05896	NA	NA	NA	NA	NA	NA	NA
chr1_109452600_109453200	0.356187	0.316868	0.23481	-0.234243	-0.964505	0.977583	0.252955	0.959832	0.818938	0.119687	0.223437	-1.94209	1.26172	-1.53924	0.139418	0.0109101
chr1_10945800_10946400	0.337435	0.00273558	0.0154211	0.170599	-3.17041	-2.15883	0.177175	1.0375	0.879194	NA	NA	NA	NA	NA	NA	NA
chr1_10946400_10947000	0.931875	0.0248246	0.00159557	-0.0181022	-2.85908	-3.46898	0.211338	1.25892	1.07528	NA	NA	NA	NA	NA	NA	NA
chr1_109465800_109466400	0.716903	0.0172885	0.221263	0.0893123	-2.91725	-1.27164	0.245763	1.20942	1.03452	NA	NA	NA	NA	NA	NA	NA
chr1_109466400_109467000	0.644923	0.0212072	0.0707976	0.0888931	-2.31809	-1.5306	0.19244	0.993522	0.840041	NA	NA	NA	NA	NA	NA	NA
chr1_109467000_109467600	0.678616	0.0028143	0.316179	0.0899038	-3.24021	-0.910116	0.216475	1.06352	0.904413	NA	NA	NA	NA	NA	NA	NA
chr1_10947000_10947600	0.931592	0.402686	0.161542	-0.0143819	-0.636386	-0.923341	0.167208	0.757928	0.655736	NA	NA	NA	NA	NA	NA	NA
chr1_109471200_109471800	0.0967164	0.722121	0.010925	0.410064	0.375876	-2.32617	0.245055	1.0546	0.90056	0.254211	0.0375174	2.70205	1.38679	1.94842	0.0655354	0.00591439
chr1_109471800_109472400	0.221091	0.586239	0.0864814	0.299122	-0.574099	-1.55124	0.243254	1.05207	0.8979	NA	NA	NA	NA	NA	NA	NA
chr1_10947600_10948200	0.263624	0.286877	0.223885	-0.173705	-0.746824	-0.740132	0.154702	0.698302	0.605563	NA	NA	NA	NA	NA	NA	NA
chr1_109476600_109477200	0.723302	0.0855149	0.00963467	-0.101726	-1.82105	2.34279	0.286688	1.05079	0.891325	0.0449922	0.0354443	-4.16384	1.3779	-3.02186	0.00673579	0.00105104
chr1_109477200_109477800	0.863708	0.167528	0.83872	0.0429998	-1.41456	0.176107	0.249993	1.01904	0.86349	0.0712008	0.550374	-1.59066	1.33569	-1.19089	0.247639	0.017838
chr1_109477800_109478400	0.263271	0.00627639	0.0351354	-0.238297	-3.1868	-2.08968	0.212071	1.14666	0.981274	NA	NA	NA	NA	NA	NA	NA
chr1_109479000_109479600	0.209211	0.0328891	0.00964063	-0.259619	-2.3746	-2.47281	0.205699	1.1009	0.940872	NA	NA	NA	NA	NA	NA	NA
chr1_109479600_109480200	0.740295	0.242613	0.0474765	-0.0517777	-0.89285	-1.3135	0.155869	0.760558	0.656285	NA	NA	NA	NA	NA	NA	NA
chr1_10948200_10948800	0.992941	0.0373813	0.356912	-0.00142538	-1.64737	-0.625118	0.160803	0.78311	0.676076	NA	NA	NA	NA	NA	NA	NA
chr1_109483200_109483800	0.767154	0.186732	0.0557513	0.0771392	-1.66446	-2.07119	0.259961	1.25386	1.07279	NA	NA	NA	NA	NA	NA	NA
chr1_109487400_109488000	0.86987	0.138911	0.056518	-0.0408089	-1.79332	-1.9837	0.248599	1.20422	1.03073	NA	NA	NA	NA	NA	NA	NA
chr1_10948800_10949400	0.663445	0.0198142	0.00736604	0.0909553	-2.73951	-2.7055	0.208527	1.16098	0.99336	NA	NA	NA	NA	NA	NA	NA
chr1_109488600_109489200	0.358129	0.00714888	0.00239926	0.192023	-3.68373	-3.55847	0.208204	1.34735	1.14868	NA	NA	NA	NA	NA	NA	NA
chr1_109489200_109489800	0.109481	0.0941039	0.000397857	-0.321608	-1.93794	-3.57582	0.199532	1.14892	0.982881	NA	NA	NA	NA	NA	NA	NA
chr1_109489800_109490400	0.461903	0.0348521	0.00228492	-0.132327	-2.15143	-2.66505	0.179317	1.00867	0.855985	NA	NA	NA	NA	NA	NA	NA
chr1_109490400_109491000	0.404617	0.169751	0.00144027	0.176697	-1.5481	-3.12582	0.211312	1.12113	0.959503	NA	NA	NA	NA	NA	NA	NA
chr1_109491000_109491600	0.929936	0.0915472	0.0701429	0.017565	-1.71001	-1.55334	0.199377	1.0058	0.850515	NA	NA	NA	NA	NA	NA	NA
chr1_109491600_109492200	0.0790343	0.0106611	0.0743333	-0.415194	-3.22064	-1.91103	0.234502	1.24258	1.06206	NA	NA	NA	NA	NA	NA	NA
chr1_109492200_109492800	0.370051	0.326048	0.0266499	-0.231956	-1.27667	-2.47991	0.257852	1.29491	1.10579	NA	NA	NA	NA	NA	NA	NA
chr1_109493400_109494000	0.231229	0.0689383	0.0347998	0.282415	-2.14668	-2.13716	0.234767	1.17026	1.00169	NA	NA	NA	NA	NA	NA	NA
chr1_109494000_109494600	0.492097	0.0111018	0.0509711	0.125318	-2.59223	-1.67503	0.181892	1.00584	0.850118	NA	NA	NA	NA	NA	NA	NA
chr1_109494600_109495200	0.219522	0.206728	5.51033e-05	0.266271	-1.63682	-4.59302	0.215799	1.28976	1.1004	NA	NA	NA	NA	NA	NA	NA
chr1_109495200_109495800	0.098912	0.389788	0.00015578	0.370968	-1.07144	-4.13653	0.223163	1.24159	1.06104	NA	NA	NA	NA	NA	NA	NA
chr1_109495800_109496400	0.995022	0.464031	0.00239207	0.00122199	-0.75717	-2.70094	0.195487	1.03094	0.871596	NA	NA	NA	NA	NA	NA	NA
chr1_109497600_109498200	0.414574	0.646993	0.0506637	0.178933	-0.449413	-1.63494	0.218598	0.979039	0.828651	NA	NA	NA	NA	NA	NA	NA
chr1_109498200_109498800	0.305958	0.00639915	0.00608432	-0.203616	-3.2526	-2.79889	0.198093	1.17316	1.00322	NA	NA	NA	NA	NA	NA	NA
chr1_109499400_109500000	0.176122	0.383572	0.00265663	-0.33563	-1.15252	-3.44786	0.246721	1.31813	1.12482	NA	NA	NA	NA	NA	NA	NA
chr1_10950000_10950600	0.586444	0.0499465	0.0126308	-0.135164	-2.8091	-3.01213	0.247832	1.41926	1.19061	NA	NA	NA	NA	NA	NA	NA
chr1_109501200_109501800	0.263388	0.110954	0.00891478	0.299598	-1.53784	2.17043	0.26669	0.9581	0.817116	0.0531402	0.0342267	-3.70827	1.25922	-2.9449	0.0080081	0.00119744
chr1_109501800_109502400	0.601923	0.0831849	0.00479644	0.134345	-1.61038	2.25788	0.256901	0.922202	0.786478	0.0442469	0.0262848	-3.86826	1.21202	-3.19157	0.00458352	0.000801
chr1_10950600_10951200	0.483867	0.035586	0.00144459	-0.171009	-3.14216	-3.98028	0.243549	1.47919	1.22213	NA	NA	NA	NA	NA	NA	NA
chr1_109507200_109507800	0.731216	0.0809518	0.00321091	-0.0799647	-2.30003	-3.35323	0.232277	1.30744	1.1163	NA	NA	NA	NA	NA	NA	NA
chr1_109507800_109508400	0.107843	0.533297	0.0761201	0.317673	-0.564386	-1.37965	0.19617	0.903473	0.771518	NA	NA	NA	NA	NA	NA	NA
chr1_109508400_109509000	0.437883	0.171167	0.00896861	0.112569	-1.07051	-1.78417	0.144649	0.777852	0.67224	NA	NA	NA	NA	NA	NA	NA
chr1_109509000_109509600	0.466957	9.49913e-05	0.66237	-0.140814	-4.0437	-0.371965	0.192993	1.00309	0.849881	NA	NA	NA	NA	NA	NA	NA
chr1_109509600_109510200	0.301997	0.0101792	0.00434603	0.228004	-3.51915	-3.3404	0.220003	1.34903	1.15029	NA	NA	NA	NA	NA	NA	NA
chr1_109514400_109515000	0.374323	0.0215815	0.0539386	0.217075	-2.9899	-2.13525	0.243483	1.28523	1.09761	NA	NA	NA	NA	NA	NA	NA
chr1_109515000_109515600	0.964077	0.020316	0.0774613	-0.0112125	-3.0671	-1.98417	0.248463	1.30518	1.11469	NA	NA	NA	NA	NA	NA	NA
chr1_109517400_109518000	0.218523	0.045013	0.859033	0.358273	-2.71323	-0.203967	0.28973	1.34019	1.14611	NA	NA	NA	NA	NA	NA	NA
chr1_109521600_109522200	0.072687	0.0228686	0.0288334	0.434967	-3.05319	-2.50287	0.240338	1.3254	1.13208	NA	NA	NA	NA	NA	NA	NA
chr1_109522200_109522800	0.661898	0.000412296	0.101274	-0.102299	-5.21262	-2.01423	0.233388	1.4368	1.22025	NA	NA	NA	NA	NA	NA	NA
chr1_109527600_109528200	0.843093	0.0452523	0.019968	0.0458241	-2.45384	-2.44583	0.231034	1.21344	1.03784	NA	NA	NA	NA	NA	NA	NA
chr1_109528200_109528800	0.0872401	0.0547321	0.0011911	0.393939	-2.66095	-3.88024	0.228577	1.37242	1.17021	NA	NA	NA	NA	NA	NA	NA
chr1_109528800_109529400	0.963628	0.0284895	0.000313553	-0.0098129	-3.09996	-4.41644	0.214764	1.39907	1.19188	NA	NA	NA	NA	NA	NA	NA
chr1_109529400_109530000	0.0119923	0.0528228	0.115736	-0.680865	-2.70255	-1.86952	0.267112	1.38265	1.18044	NA	NA	NA	NA	NA	NA	NA
chr1_109530000_109530600	0.573503	0.00232689	0.0590829	-0.114674	-3.45319	-1.80812	0.203192	1.11119	0.949314	NA	NA	NA	NA	NA	NA	NA
chr1_109530600_109531200	0.569872	0.182371	0.173378	0.138468	-1.45702	-1.26486	0.243046	1.08667	0.923858	NA	NA	NA	NA	NA	NA	NA
chr1_109531200_109531800	0.775012	0.00236629	0.00186137	-0.0548726	-3.81942	-3.34034	0.191572	1.23116	1.05104	NA	NA	NA	NA	NA	NA	NA
chr1_109531800_109532400	0.944479	0.115915	0.0259759	0.0120889	-1.47114	-1.78045	0.173245	0.929359	0.790274	NA	NA	NA	NA	NA	NA	NA
chr1_109532400_109533000	0.94362	0.254827	4.96186e-06	0.0128517	-1.26403	-4.50863	0.181368	1.10505	0.945168	NA	NA	NA	NA	NA	NA	NA
chr1_109533000_109533600	0.220308	0.491637	0.0248233	0.339129	-0.94972	-2.67077	0.275318	1.377	1.17599	NA	NA	NA	NA	NA	NA	NA
chr1_109534800_109535400	0.844753	0.00109691	0.0613339	-0.0393099	-3.6346	-1.75751	0.200339	1.08794	0.930988	NA	NA	NA	NA	NA	NA	NA
chr1_109538400_109539000	0.955772	0.032228	0.0373651	0.0135852	-2.85615	-2.36966	0.244473	1.31903	1.12637	NA	NA	NA	NA	NA	NA	NA
chr1_109539600_109540200	0.30584	0.282544	0.00306712	0.230673	-1.21038	-2.89783	0.224361	1.12156	0.959925	NA	NA	NA	NA	NA	NA	NA
chr1_109540200_109540800	0.632826	0.00443127	0.295465	-0.114267	-3.38813	-1.05154	0.2386	1.16934	1.00096	NA	NA	NA	NA	NA	NA	NA
chr1_109540800_109541400	0.158636	0.0106097	0.0259288	0.328124	-3.28762	-2.43948	0.231399	1.26756	1.08244	NA	NA	NA	NA	NA	NA	NA
chr1_109541400_109542000	0.00113863	0.0311119	0.00607324	0.735595	-2.65916	-2.90906	0.220931	1.21989	1.04247	NA	NA	NA	NA	NA	NA	NA
chr1_109542000_109542600	0.0562623	0.221905	0.0775743	0.509658	-1.53321	-1.90285	0.264539	1.24906	1.06941	NA	NA	NA	NA	NA	NA	NA
chr1_109542600_109543200	0.742763	0.0176662	0.000563354	0.0560658	-2.54814	-3.18488	0.170458	1.06002	0.900159	NA	NA	NA	NA	NA	NA	NA
chr1_109543200_109543800	0.742366	0.0721334	0.00255275	-0.068193	-2.02743	-2.945	0.206997	1.11805	0.956773	NA	NA	NA	NA	NA	NA	NA
chr1_109543800_109544400	0.875206	0.13837	0.0146514	-0.0287267	-1.44757	-2.03447	0.182547	0.970701	0.822101	NA	NA	NA	NA	NA	NA	NA
chr1_109544400_109545000	0.932696	0.0256955	0.167058	-0.0227752	-3.24598	-1.70458	0.269146	1.43799	1.22661	NA	NA	NA	NA	NA	NA	NA
chr1_10954800_10955400	0.721186	1.33074e-05	0.125903	0.0667773	-5.15633	-1.49907	0.186703	1.13776	0.973049	NA	NA	NA	NA	NA	NA	NA
chr1_109548000_109548600	0.995412	0.000327112	0.306163	-0.00108679	-3.7556	-0.885106	0.188635	1.0168	0.861467	NA	NA	NA	NA	NA	NA	NA
chr1_109548600_109549200	0.982917	9.82306e-05	0.482781	-0.00400116	-3.685	0.547895	0.186502	0.916135	0.778368	0.00374996	0.383183	-4.2329	1.20215	-3.52111	0.00214751	0.000468953
chr1_10956600_10957200	0.883728	0.00347757	0.00489835	-0.0322385	-4.32118	-3.47965	0.219999	1.45113	1.21505	NA	NA	NA	NA	NA	NA	NA
chr1_10958400_10959000	0.837357	0.628551	0.00596537	-0.0393276	-0.462651	-2.26399	0.191193	0.954031	0.809522	NA	NA	NA	NA	NA	NA	NA
chr1_10959000_10959600	0.628868	0.277244	0.00944668	-0.0853882	-1.0045	-2.06329	0.176242	0.920537	0.782884	NA	NA	NA	NA	NA	NA	NA
chr1_10960800_10961400	0.0810718	0.0416868	0.00201422	-0.385772	-2.64001	-3.45348	0.219378	1.28314	1.09518	NA	NA	NA	NA	NA	NA	NA
chr1_10961400_10962000	0.779912	0.440022	0.00383331	0.0674663	-0.933888	-3.03713	0.240928	1.20566	1.03104	NA	NA	NA	NA	NA	NA	NA
chr1_109616400_109617000	0.770965	0.0108569	0.576218	0.0781406	-3.58862	-0.659636	0.267848	1.38809	1.17716	NA	NA	NA	NA	NA	NA	NA
chr1_109617000_109617600	0.25422	0.635072	0.365422	-0.318102	-0.556416	-0.910822	0.277736	1.16957	1.00274	NA	NA	NA	NA	NA	NA	NA
chr1_109617600_109618200	0.853554	0.714957	0.945882	-0.0577747	-0.452371	-0.0720202	0.31236	1.23591	1.05891	NA	NA	NA	NA	NA	NA	NA
chr1_109619400_109620000	0.159332	0.0256907	0.852196	-0.288455	-2.1054	-0.147782	0.203766	0.932679	0.791561	NA	NA	NA	NA	NA	NA	NA
chr1_109620000_109620600	0.732961	0.000503728	0.951464	-0.0610227	-3.2501	-0.047202	0.178461	0.910264	0.773954	NA	NA	NA	NA	NA	NA	NA
chr1_109620600_109621200	0.472225	0.00134614	0.885151	-0.142633	-3.2272	-0.120567	0.197822	0.984349	0.833032	NA	NA	NA	NA	NA	NA	NA
chr1_109621200_109621800	0.548125	0.000650528	0.193218	-0.122957	-3.84491	-1.22602	0.204186	1.09974	0.937289	NA	NA	NA	NA	NA	NA	NA
chr1_109621800_109622400	0.809824	0.000935275	0.0239442	-0.0555734	-4.98722	-2.78271	0.230448	1.4717	1.2176	NA	NA	NA	NA	NA	NA	NA
chr1_109622400_109623000	0.571188	0.00553603	0.0224033	-0.135864	-4.08446	-2.82829	0.239292	1.44723	1.22347	NA	NA	NA	NA	NA	NA	NA
chr1_109623000_109623600	0.521359	0.0327644	0.0116868	0.150342	-2.80959	-2.84294	0.233801	1.30162	1.1112	NA	NA	NA	NA	NA	NA	NA
chr1_109623600_109624200	0.007954	0.0579233	0.183678	0.653626	-2.15524	-1.28274	0.242387	1.1263	0.959565	NA	NA	NA	NA	NA	NA	NA
chr1_109624200_109624800	0.440902	0.0973863	0.0306976	0.151182	-1.70195	-1.88435	0.195555	1.01915	0.862274	NA	NA	NA	NA	NA	NA	NA
chr1_109624800_109625400	0.242463	0.0100387	0.671115	0.214269	-2.32485	-0.323108	0.182463	0.889502	0.759173	NA	NA	NA	NA	NA	NA	NA
chr1_109625400_109626000	0.714409	0.0437993	0.120198	0.0522271	-1.45899	-0.970625	0.142402	0.716498	0.620427	NA	NA	NA	NA	NA	NA	NA
chr1_109626000_109626600	0.916215	0.0236232	0.0630627	0.01744	-2.07148	-1.44141	0.165447	0.904276	0.768682	NA	NA	NA	NA	NA	NA	NA
chr1_109626600_109627200	0.822142	0.0846492	0.00251093	-0.0376666	-1.67265	-2.51183	0.167217	0.962454	0.814643	NA	NA	NA	NA	NA	NA	NA
chr1_109627200_109627800	0.680029	0.137397	0.00263848	-0.0884007	-1.66318	-2.91715	0.213852	1.11251	0.951	NA	NA	NA	NA	NA	NA	NA
chr1_109627800_109628400	0.46918	0.0341147	0.0184926	0.156851	-1.70666	1.64369	0.216051	0.796826	0.688797	0.0275675	0.0483115	-3.35034	1.05327	-3.1809	0.00469639	0.00081476
chr1_109628400_109629000	0.710453	0.0979357	3.35193e-18	0.0881405	0.756403	4.12912	0.236886	0.453697	0.405049	0.0490196	0.00369342	-3.37272	0.608198	-5.54542	1.98842e-05	4.12691e-05
chr1_109629000_109629600	0.683305	0.0821918	0.590241	-0.0778023	-1.38151	0.368137	0.190275	0.78855	0.681918	0.0439361	0.442698	-1.74964	1.04251	-1.6783	0.108846	0.00891082
chr1_109629600_109630200	0.214558	0.600648	0.00321739	-0.265	-0.536633	-2.59941	0.212449	1.02258	0.865535	NA	NA	NA	NA	NA	NA	NA
chr1_109630200_109630800	0.14322	0.0223586	0.000123612	-0.31045	-3.26382	-4.68599	0.210759	1.4114	1.18304	NA	NA	NA	NA	NA	NA	NA
chr1_109630800_109631400	0.652247	0.00149657	0.00305869	-0.0782281	-3.49806	-2.78039	0.173182	1.07767	0.920748	NA	NA	NA	NA	NA	NA	NA
chr1_109631400_109632000	0.991722	0.197388	0.0803198	-0.0014169	-0.84239	-0.995539	0.136307	0.650088	0.564716	NA	NA	NA	NA	NA	NA	NA
chr1_109632000_109632600	0.93661	0.149865	0.000119966	-0.0173447	-1.89016	-4.41819	0.217655	1.30467	1.11317	NA	NA	NA	NA	NA	NA	NA
chr1_109636200_109636800	0.144115	0.151407	0.880658	-0.367083	-1.49228	0.132078	0.249768	1.03396	0.87796	0.06604	0.563675	-1.62435	1.35643	-1.19752	0.245103	0.0176735
chr1_109636800_109637400	0.620381	0.00494523	0.441978	-0.122708	-3.41892	-0.789437	0.247132	1.19519	1.02355	NA	NA	NA	NA	NA	NA	NA
chr1_109638600_109639200	0.405006	0.00748611	0.0622691	-0.193624	-3.33819	-1.97434	0.231748	1.22821	1.04967	NA	NA	NA	NA	NA	NA	NA
chr1_109639200_109639800	0.615308	0.0464975	0.00202299	0.116329	-2.73576	-3.65786	0.230926	1.36076	1.1605	NA	NA	NA	NA	NA	NA	NA
chr1_109639800_109640400	0.487494	0.772673	1.71866e-05	0.153538	-0.350447	-4.62699	0.220496	1.21054	1.03537	NA	NA	NA	NA	NA	NA	NA
chr1_109640400_109641000	0.0565678	0.126718	0.00012995	0.454312	-2.2995	-4.88511	0.236108	1.49586	1.23751	NA	NA	NA	NA	NA	NA	NA
chr1_109641000_109641600	0.746366	0.0544272	0.043287	-0.0816468	-2.55554	-2.295	0.251889	1.31637	1.12426	NA	NA	NA	NA	NA	NA	NA
chr1_109643400_109644000	0.642387	0.000462586	0.0520946	0.0847101	-3.90726	-1.81396	0.181986	1.08686	0.925136	NA	NA	NA	NA	NA	NA	NA
chr1_10964400_10965000	0.687698	0.00261703	0.00619976	0.0879977	-4.29879	-3.2925	0.218411	1.40022	1.18289	NA	NA	NA	NA	NA	NA	NA
chr1_109644000_109644600	0.530594	0.0644196	0.17133	0.16605	-2.45959	-1.54972	0.264066	1.31848	1.12649	NA	NA	NA	NA	NA	NA	NA
chr1_10965000_10965600	0.582202	0.00172705	0.0641726	0.126648	-4.21765	-2.09932	0.229609	1.31739	1.1243	NA	NA	NA	NA	NA	NA	NA
chr1_109655400_109656000	0.279088	0.413941	0.647969	0.249856	-0.733462	0.350495	0.229856	0.894833	0.765821	0.152109	0.471362	-1.08396	1.1778	-0.920326	0.368371	0.0255993
chr1_109656000_109656600	0.0851749	0.197396	0.0676528	0.313972	-0.840216	1.04139	0.18097	0.648421	0.56504	0.0808315	0.0976514	-1.8816	0.860069	-2.18773	0.0407329	0.00408516
chr1_109656600_109657200	0.175535	0.106287	6.61686e-05	0.217375	-1.61743	-3.466	0.159573	0.994331	0.839962	NA	NA	NA	NA	NA	NA	NA
chr1_109657200_109657800	0.496636	0.0228801	0.0220863	-0.134575	-2.39216	-2.04399	0.197396	1.03854	0.882058	NA	NA	NA	NA	NA	NA	NA
chr1_109658400_109659000	0.283155	0.0828121	0.447175	0.286565	-2.09983	-0.784541	0.265874	1.20102	1.02891	NA	NA	NA	NA	NA	NA	NA
chr1_109659000_109659600	0.215818	0.68554	0.284911	-0.328473	-0.396158	0.889768	0.264064	0.976135	0.828556	0.242612	0.258004	-1.28593	1.28037	-1.00434	0.327212	0.0229485
chr1_109668000_109668600	0.105279	0.0285955	0.114259	0.415952	-2.98503	-1.82914	0.254966	1.34812	1.15021	NA	NA	NA	NA	NA	NA	NA
chr1_109668600_109669200	0.619804	0.0186574	0.185621	0.129148	-3.24869	-1.54863	0.259675	1.36334	1.16365	NA	NA	NA	NA	NA	NA	NA
chr1_109669200_109669800	0.849472	0.0886854	0.0286289	-0.0474061	-2.19622	-2.42392	0.249271	1.28021	1.09494	NA	NA	NA	NA	NA	NA	NA
chr1_109687200_109687800	0.672969	0.00818882	0.320477	-0.0899474	-2.81298	-0.885071	0.212613	1.04714	0.887401	NA	NA	NA	NA	NA	NA	NA
chr1_109687800_109688400	0.287554	0.00562175	0.12303	0.233347	-3.15839	-1.48954	0.218494	1.12118	0.959452	NA	NA	NA	NA	NA	NA	NA
chr1_109688400_109689000	0.328938	0.031897	0.00489991	0.210101	-2.66454	-3.00691	0.214385	1.22813	1.05002	NA	NA	NA	NA	NA	NA	NA
chr1_10969200_10969800	0.417921	0.0222654	0.44861	-0.22105	-3.16609	-0.887974	0.272002	1.36816	1.16825	NA	NA	NA	NA	NA	NA	NA
chr1_109704600_109705200	0.982832	0.571303	0.0168275	0.0058764	-0.774368	-2.82208	0.272556	1.36427	1.16498	NA	NA	NA	NA	NA	NA	NA
chr1_109711800_109712400	0.692834	0.00110526	0.808969	-0.0775198	-3.24239	-0.19902	0.195801	0.971205	0.82151	NA	NA	NA	NA	NA	NA	NA
chr1_109712400_109713000	0.635017	0.0330525	7.143e-05	-0.082357	-2.39895	-3.90241	0.173083	1.11324	0.950332	NA	NA	NA	NA	NA	NA	NA
chr1_109713000_109713600	0.612032	0.313229	1.73672e-08	0.0733917	-1.02975	-5.18617	0.144349	1.01705	0.861411	NA	NA	NA	NA	NA	NA	NA
chr1_109713600_109714200	0.96371	0.0204622	9.91196e-05	0.00881528	-3.01053	-4.39734	0.193366	1.28263	1.09388	NA	NA	NA	NA	NA	NA	NA
chr1_109714200_109714800	0.935989	0.0686583	0.00619054	0.0188108	-2.37856	-3.08065	0.233756	1.29534	1.10657	NA	NA	NA	NA	NA	NA	NA
chr1_109714800_109715400	0.578306	0.0213361	0.0499766	-0.138779	-3.19492	-2.31685	0.249022	1.37072	1.17071	NA	NA	NA	NA	NA	NA	NA
chr1_109715400_109716000	0.468898	0.00384345	0.0107461	-0.151327	-3.70924	-2.78598	0.208309	1.25958	1.07607	NA	NA	NA	NA	NA	NA	NA
chr1_10971600_10972200	0.138505	0.00433635	0.129405	-0.380958	-4.29727	-1.88981	0.255548	1.47942	1.23812	NA	NA	NA	NA	NA	NA	NA
chr1_109719000_109719600	0.121661	0.0880637	0.216686	-0.554355	-2.41632	1.49175	0.355757	1.40573	1.20152	0.0458316	0.210972	-3.90807	1.84925	-2.11333	0.0473365	0.00458678
chr1_10972200_10972800	0.48868	0.194913	0.379874	0.212771	-1.93383	-1.11251	0.306397	1.48408	1.2625	NA	NA	NA	NA	NA	NA	NA
chr1_10973400_10974000	0.932903	0.000339993	0.00242672	-0.0151005	-4.66832	-3.34654	0.179002	1.26765	1.08153	NA	NA	NA	NA	NA	NA	NA
chr1_109739400_109740000	0.959918	0.996621	0.00109392	-0.00926844	0.00395324	-2.63881	0.184062	0.931553	0.789675	0.330851	0.0156647	2.64276	1.22122	2.16403	0.0427395	0.00423792
chr1_10974000_10974600	0.245942	0.0019058	0.00189132	-0.201329	-3.56233	-3.04747	0.172719	1.1235	0.960401	NA	NA	NA	NA	NA	NA	NA
chr1_109740000_109740600	0.588734	0.0219436	0.0967754	-0.0886951	-2.07054	-1.27527	0.163629	0.892539	0.76224	NA	NA	NA	NA	NA	NA	NA
chr1_109740600_109741200	0.0759577	0.60516	0.0109748	0.395831	-0.537231	-2.26675	0.221229	1.03655	0.878116	NA	NA	NA	NA	NA	NA	NA
chr1_10974600_10975200	0.22881	0.00980943	0.017098	-0.280828	-3.52067	-2.76765	0.232233	1.34275	1.14539	NA	NA	NA	NA	NA	NA	NA
chr1_109747800_109748400	0.0268032	0.017242	0.224499	-0.556398	-2.99458	-1.29584	0.248352	1.24095	1.06165	NA	NA	NA	NA	NA	NA	NA
chr1_109748400_109749000	0.788865	0.00157792	0.136741	-0.06142	-4.05693	-1.60725	0.22888	1.25618	1.07328	NA	NA	NA	NA	NA	NA	NA
chr1_109749000_109749600	0.0812755	0.0344655	0.124229	0.497695	-3.31918	-1.98639	0.283218	1.55278	1.28361	NA	NA	NA	NA	NA	NA	NA
chr1_109750800_109751400	0.843672	0.137922	0.000780083	0.047817	-2.14297	-4.19379	0.241986	1.43537	1.21815	NA	NA	NA	NA	NA	NA	NA
chr1_109751400_109752000	0.277191	0.0980648	0.0099683	0.257064	-2.05808	-2.76176	0.235551	1.23493	1.05564	NA	NA	NA	NA	NA	NA	NA
chr1_10975200_10975800	0.609915	0.0318002	0.0482173	0.132606	-3.06036	-2.39939	0.259269	1.40975	1.2029	NA	NA	NA	NA	NA	NA	NA
chr1_109752000_109752600	0.675073	0.163444	0.0063132	-0.105585	-1.94512	-3.28808	0.251294	1.3877	1.18396	NA	NA	NA	NA	NA	NA	NA
chr1_10975800_10976400	0.918137	0.0428609	0.201729	0.0266516	-2.62012	-1.40519	0.258791	1.28087	1.095	NA	NA	NA	NA	NA	NA	NA
chr1_109758600_109759200	0.433374	0.000844976	0.283659	-0.182999	-4.27043	-1.1487	0.232846	1.24901	1.06688	NA	NA	NA	NA	NA	NA	NA
chr1_109759200_109759800	0.482216	0.000587624	0.606273	-0.119272	-3.17217	-0.395015	0.169225	0.899684	0.764518	NA	NA	NA	NA	NA	NA	NA
chr1_109759800_109760400	0.250786	0.00301042	0.126936	-0.286234	-4.30228	-1.86507	0.2481	1.4223	1.21395	NA	NA	NA	NA	NA	NA	NA
chr1_109760400_109761000	0.828522	0.0919532	0.00252929	0.0493838	-2.13753	-3.31321	0.227528	1.25885	1.07536	NA	NA	NA	NA	NA	NA	NA
chr1_109761000_109761600	0.254629	0.194895	0.000103511	0.221242	-1.433	-3.76444	0.193335	1.09968	0.939135	NA	NA	NA	NA	NA	NA	NA
chr1_109761600_109762200	0.557283	0.351476	0.00167886	0.114356	-0.951076	-2.76204	0.194338	1.01701	0.86036	NA	NA	NA	NA	NA	NA	NA
chr1_109762800_109763400	0.0559074	0.0143102	0.0836126	0.494287	-3.66093	-2.14227	0.256185	1.47408	1.22852	NA	NA	NA	NA	NA	NA	NA
chr1_109763400_109764000	0.954921	7.62947e-07	7.72453e-16	0.0100965	1.82378	2.88835	0.178256	0.350514	0.313001	0.00154152	0.00384251	-1.06457	0.469925	-2.2654	0.0347455	0.00361925
chr1_10976400_10977000	0.403502	0.0038273	0.0277705	0.21166	-4.64388	-2.89931	0.252523	1.57622	1.30243	NA	NA	NA	NA	NA	NA	NA
chr1_109764000_109764600	0.526548	1.32743e-09	3.51551e-19	-0.13122	2.40088	3.47814	0.206635	0.366854	0.328378	0.000526235	0.00365701	-1.07725	0.492355	-2.18796	0.0407142	0.00408401
chr1_109764600_109765200	0.176976	0.115034	0.00162935	0.309536	-2.01542	-3.49219	0.227992	1.27009	1.08465	NA	NA	NA	NA	NA	NA	NA
chr1_109765200_109765800	0.492649	0.115355	0.000211573	0.164412	-2.4019	-4.78997	0.238939	1.51499	1.2556	NA	NA	NA	NA	NA	NA	NA
chr1_109765800_109766400	0.232541	0.00178301	0.123643	0.282556	-4.24124	-1.75711	0.23555	1.32888	1.13367	NA	NA	NA	NA	NA	NA	NA
chr1_109766400_109767000	0.316559	0.0566337	0.936026	0.261806	-2.14398	-0.0767629	0.260371	1.11454	0.954469	NA	NA	NA	NA	NA	NA	NA
chr1_109767000_109767600	0.143364	0.0048574	0.828992	-0.387587	-3.4165	0.221042	0.263222	1.19182	1.02127	0.0124174	0.547011	-3.63755	1.56953	-2.3176	0.0311871	0.00332813
chr1_109769400_109770000	0.774821	0.195808	0.503205	0.081747	-1.63594	-0.723841	0.285146	1.258	1.07816	NA	NA	NA	NA	NA	NA	NA
chr1_109770000_109770600	0.857965	0.0157718	0.167093	-0.0366805	-2.48077	-1.19312	0.204544	1.01381	0.858638	NA	NA	NA	NA	NA	NA	NA
chr1_109770600_109771200	0.33356	0.622702	0.0183211	0.206775	0.456364	-1.87781	0.213025	0.925259	0.78573	0.222199	0.048103	2.33418	1.21387	1.92292	0.068846	0.00615335
chr1_109771800_109772400	0.089229	0.0488131	0.314377	-0.443105	-2.09352	0.900637	0.258737	1.05239	0.891651	0.0328491	0.277874	-2.99416	1.37933	-2.17073	0.0421635	0.00419167
chr1_109772400_109773000	0.717785	0.22777	0.23573	-0.0699683	-1.07987	-0.907436	0.193162	0.891006	0.761679	NA	NA	NA	NA	NA	NA	NA
chr1_109773000_109773600	0.491549	0.116325	0.153444	0.118428	-1.31773	-1.02529	0.171674	0.833394	0.713969	NA	NA	NA	NA	NA	NA	NA
chr1_109773600_109774200	0.148577	0.556456	0.00368674	0.320628	-0.639026	-2.7278	0.220606	1.0837	0.921997	NA	NA	NA	NA	NA	NA	NA
chr1_109774200_109774800	0.707474	0.76414	0.0101188	0.0831624	-0.310876	-2.2892	0.221122	1.03387	0.876821	NA	NA	NA	NA	NA	NA	NA
chr1_109776600_109777200	0.617571	0.000724113	0.00193755	0.0917307	-4.28035	-3.33735	0.183269	1.23541	1.05428	NA	NA	NA	NA	NA	NA	NA
chr1_109777200_109777800	0.633748	0.0191612	0.00312889	0.104902	-3.07169	-3.32878	0.21964	1.29464	1.10505	NA	NA	NA	NA	NA	NA	NA
chr1_109777800_109778400	0.0621239	0.00560001	0.0330297	-0.437291	-3.74692	-2.44623	0.232356	1.32948	1.13503	NA	NA	NA	NA	NA	NA	NA
chr1_109778400_109779000	0.227404	0.0355423	0.00527525	-0.270986	-2.67019	-3.04698	0.223414	1.2567	1.07338	NA	NA	NA	NA	NA	NA	NA
chr1_109783200_109783800	0.625998	0.00157672	0.017791	0.114321	-4.75576	-2.92056	0.233999	1.47246	1.21631	NA	NA	NA	NA	NA	NA	NA
chr1_109784400_109785000	0.474124	0.00282445	0.137253	-0.182323	-4.57675	-1.87443	0.25396	1.50278	1.25335	NA	NA	NA	NA	NA	NA	NA
chr1_109788000_109788600	0.23444	0.00294724	0.01594	0.249023	-3.73763	-2.5723	0.208446	1.23283	1.05294	NA	NA	NA	NA	NA	NA	NA
chr1_109788600_109789200	0.671933	0.0100774	0.0768991	0.0900413	-2.83887	-1.65573	0.212121	1.08675	0.928387	NA	NA	NA	NA	NA	NA	NA
chr1_109789200_109789800	0.923776	0.00301708	0.593872	0.0245183	-3.82462	-0.578227	0.255749	1.26469	1.08164	NA	NA	NA	NA	NA	NA	NA
chr1_109790400_109791000	0.936251	0.668104	0.00234147	0.0197352	-0.5097	-3.15487	0.246255	1.18604	1.01585	NA	NA	NA	NA	NA	NA	NA
chr1_109791000_109791600	0.961682	0.042781	0.0107888	-0.0113794	-2.69701	-2.91231	0.236395	1.31795	1.12549	NA	NA	NA	NA	NA	NA	NA
chr1_109792200_109792800	0.731947	0.790913	0.810799	0.0670442	-0.195894	0.153335	0.195299	0.73732	0.639178	0.275287	0.540209	-0.349229	0.975802	-0.357889	0.724176	0.0488136
chr1_109792800_109793400	0.340045	0.0504636	0.084572	-0.251146	-2.69674	-2.02715	0.262246	1.36561	1.16614	NA	NA	NA	NA	NA	NA	NA
chr1_10979400_10980000	0.716825	0.0953096	0.947642	0.101903	-1.99938	0.0671115	0.280328	1.18973	1.01996	0.0481903	0.581539	-2.06649	1.56709	-1.31868	0.202179	0.0149259
chr1_10980000_10980600	0.710826	0.00129018	0.0505925	0.0854607	-4.42252	-2.26065	0.229994	1.34362	1.14543	NA	NA	NA	NA	NA	NA	NA
chr1_109802400_109803000	0.0830225	0.0172918	0.121938	-0.420183	-2.98776	-1.6492	0.240494	1.23869	1.05916	NA	NA	NA	NA	NA	NA	NA
chr1_109803000_109803600	0.917311	0.00296287	0.0698506	-0.023663	-3.91177	-2.0146	0.227467	1.291	1.10191	NA	NA	NA	NA	NA	NA	NA
chr1_109803600_109804200	0.820137	0.00200341	0.240598	0.0467507	-3.40022	-1.07837	0.205192	1.07771	0.914646	NA	NA	NA	NA	NA	NA	NA
chr1_109804200_109804800	0.43633	0.00863121	0.0134179	0.1696	-3.33648	-2.68061	0.217194	1.25069	1.06903	NA	NA	NA	NA	NA	NA	NA
chr1_10980600_10981200	0.146582	0.0158857	0.00152622	0.312991	-3.28006	-3.70887	0.214284	1.34194	1.14476	NA	NA	NA	NA	NA	NA	NA
chr1_109806000_109806600	0.253472	0.0269783	0.00237713	-0.242725	-2.79505	-3.31042	0.211589	1.24905	1.06759	NA	NA	NA	NA	NA	NA	NA
chr1_109806600_109807200	0.405271	0.078649	0.00614914	0.163422	-1.81881	-2.42636	0.195709	1.02593	0.87083	NA	NA	NA	NA	NA	NA	NA
chr1_109807200_109807800	0.97399	0.00356796	0.0103459	0.00739283	-4.24419	-3.15129	0.226293	1.42933	1.21074	NA	NA	NA	NA	NA	NA	NA
chr1_109807800_109808400	0.735739	0.0902244	0.324024	0.0734073	-1.479	0.73658	0.217026	0.866325	0.743974	0.0465591	0.284238	-2.21558	1.14193	-1.94019	0.0665874	0.00598709
chr1_109808400_109809000	0.722198	0.214923	0.325666	-0.0797919	-1.07256	0.729964	0.223939	0.860552	0.739808	0.0864871	0.28531	-1.80252	1.13484	-1.58835	0.127892	0.0101627
chr1_109816800_109817400	0.004082	0.341338	3.32455e-05	0.67603	-1.33373	-5.08884	0.231133	1.39643	1.18248	NA	NA	NA	NA	NA	NA	NA
chr1_109817400_109818000	0.243983	0.343692	0.000749058	0.293117	-1.34864	-4.17367	0.250418	1.41897	1.2081	NA	NA	NA	NA	NA	NA	NA
chr1_109818000_109818600	0.0513302	0.113087	0.00171009	0.497643	-2.44166	-4.08246	0.252962	1.53036	1.27394	NA	NA	NA	NA	NA	NA	NA
chr1_109818600_109819200	0.248991	0.0175145	0.00627598	0.267137	-3.33414	-3.28301	0.230667	1.3851	1.18127	NA	NA	NA	NA	NA	NA	NA
chr1_109821600_109822200	0.987427	0.227991	0.739246	0.00380301	-1.21527	-0.2835	0.240862	1.0032	0.849872	NA	NA	NA	NA	NA	NA	NA
chr1_109822200_109822800	0.360019	0.770253	0.740269	0.212166	-0.266003	-0.25769	0.230954	0.90889	0.775656	NA	NA	NA	NA	NA	NA	NA
chr1_109823400_109824000	0.430805	7.49631e-08	1.90705e-23	-0.149026	1.90338	3.68144	0.188561	0.333217	0.298747	0.00103069	0.0031576	-1.77805	0.44753	-3.97304	0.000749296	0.00023532
chr1_109824000_109824600	0.127768	2.83803e-19	5.95105e-41	-0.297799	2.76209	4.72459	0.194263	0.259849	0.236973	1.50551e-05	0.00107016	-1.9625	0.351679	-5.58039	1.83828e-05	3.83516e-05
chr1_109824600_109825200	0.861261	0.00217307	0.693233	-0.0472823	-4.04377	0.436745	0.269994	1.2922	1.10465	0.00931959	0.492639	-4.48052	1.70001	-2.63558	0.0158558	0.00199485
chr1_109829400_109830000	0.818513	0.000849791	0.00480632	0.0524726	-5.24215	-3.63562	0.228208	1.53398	1.26669	NA	NA	NA	NA	NA	NA	NA
chr1_10983000_10983600	0.561033	0.0124401	0.0213509	0.139104	-3.56607	-2.78517	0.238666	1.40645	1.19506	NA	NA	NA	NA	NA	NA	NA
chr1_109830000_109830600	0.992476	0.00190142	0.0139009	-0.00226632	-4.74275	-3.08148	0.239845	1.49545	1.23538	NA	NA	NA	NA	NA	NA	NA
chr1_10983600_10984200	0.61063	0.14094	0.326646	0.149824	-2.14974	-1.21741	0.293521	1.45103	1.23633	NA	NA	NA	NA	NA	NA	NA
chr1_109839000_109839600	0.208912	1.15491e-06	1.0789e-11	-0.39441	3.26328	4.21131	0.312289	0.638706	0.563092	0.00163097	0.00409307	-0.948025	0.85148	-1.11339	0.278746	0.019826
chr1_109851000_109851600	0.713322	0.378354	0.010391	0.0989007	-1.27097	-3.18899	0.268592	1.43771	1.22597	NA	NA	NA	NA	NA	NA	NA
chr1_109851600_109852200	0.690187	0.694375	0.00621598	0.103957	-0.511534	-3.08826	0.26021	1.29891	1.10987	NA	NA	NA	NA	NA	NA	NA
chr1_109852200_109852800	0.0869637	0.0458635	0.803703	0.43187	-2.12473	0.222809	0.250364	1.05372	0.894542	0.0317852	0.537946	-2.34754	1.38222	-1.69839	0.10494	0.00864577
chr1_109853400_109854000	0.967296	0.0223759	0.0126331	0.00957142	-3.07556	-2.87073	0.232988	1.33016	1.13475	NA	NA	NA	NA	NA	NA	NA
chr1_109855800_109856400	0.221896	0.0126641	0.0159802	0.265061	-3.09817	-2.55749	0.215932	1.22509	1.04729	NA	NA	NA	NA	NA	NA	NA
chr1_10986000_10986600	0.270773	0.19617	0.000371038	-0.262781	-1.82544	-4.37282	0.237575	1.40487	1.19544	NA	NA	NA	NA	NA	NA	NA
chr1_10986600_10987200	0.80706	0.197552	0.00173262	0.063343	-1.97841	-4.0425	0.258828	1.52734	1.26307	NA	NA	NA	NA	NA	NA	NA
chr1_10987200_10987800	0.158127	0.156312	0.014268	0.426244	-2.23151	-3.21502	0.300225	1.56485	1.29396	NA	NA	NA	NA	NA	NA	NA
chr1_109877400_109878000	0.46498	0.00419268	0.0561583	0.151602	-3.30758	-1.86794	0.206857	1.13431	0.969144	NA	NA	NA	NA	NA	NA	NA
chr1_109878000_109878600	0.618904	0.137626	0.227705	0.144038	-2.15633	-1.49083	0.288869	1.44323	1.22991	NA	NA	NA	NA	NA	NA	NA
chr1_109879800_109880400	0.67611	0.0428988	0.000282856	-0.0858188	-2.59515	-4.04595	0.204943	1.2689	1.08345	NA	NA	NA	NA	NA	NA	NA
chr1_109880400_109881000	0.442422	0.243802	0.000961603	-0.169783	-1.37254	-3.39102	0.22035	1.17214	1.00313	NA	NA	NA	NA	NA	NA	NA
chr1_109881600_109882200	0.347402	0.032497	0.0349622	0.191602	-2.2722	-1.90528	0.203155	1.05101	0.89382	NA	NA	NA	NA	NA	NA	NA
chr1_109882200_109882800	0.0902055	0.016489	0.603776	0.391559	-2.53134	-0.460217	0.229343	1.04164	0.884564	NA	NA	NA	NA	NA	NA	NA
chr1_109883400_109884000	0.177956	0.0994154	0.00125916	-0.327513	-2.3969	-3.9985	0.241783	1.44407	1.21206	NA	NA	NA	NA	NA	NA	NA
chr1_109884600_109885200	0.278156	0.00489696	0.0194451	-0.210548	-3.13542	-2.21267	0.193318	1.09482	0.934825	NA	NA	NA	NA	NA	NA	NA
chr1_109886400_109887000	0.288736	0.0205265	0.00429181	0.21555	-2.69444	-2.85757	0.202327	1.14856	0.982605	NA	NA	NA	NA	NA	NA	NA
chr1_109887000_109887600	0.0192211	0.00115335	0.0559145	0.548051	-4.68994	-2.29484	0.231107	1.41025	1.18943	NA	NA	NA	NA	NA	NA	NA
chr1_109889400_109890000	0.00416696	0.156689	0.491987	0.933766	-2.16689	-0.89443	0.320002	1.52093	1.29788	NA	NA	NA	NA	NA	NA	NA
chr1_109890000_109890600	0.12994	0.00898163	0.622072	0.400294	-3.46941	-0.551642	0.262624	1.30746	1.11641	NA	NA	NA	NA	NA	NA	NA
chr1_109891800_109892400	0.225612	0.000492211	0.00277071	0.227409	-4.65053	-3.38381	0.186761	1.30006	1.10882	NA	NA	NA	NA	NA	NA	NA
chr1_109893600_109894200	0.870087	0.00691727	0.102421	0.0403024	-3.7508	-1.91753	0.245929	1.36615	1.16561	NA	NA	NA	NA	NA	NA	NA
chr1_109894200_109894800	0.651662	0.0260565	0.225142	-0.105008	-2.46506	-1.14219	0.23205	1.09475	0.937073	NA	NA	NA	NA	NA	NA	NA
chr1_109894800_109895400	0.179548	0.153902	0.0308381	-0.344225	-1.89408	-2.46188	0.25506	1.32043	1.12752	NA	NA	NA	NA	NA	NA	NA
chr1_109895400_109896000	0.216163	5.17815e-42	1.86024e-67	0.319328	4.54655	7.43532	0.256905	0.222383	0.211055	0	0.000207516	-2.88877	0.306592	-9.42221	8.52424e-09	0
chr1_109896000_109896600	0.519433	2.67839e-36	1.25881e-69	0.124468	3.23164	6.27452	0.19267	0.1817	0.170589	0	0.000207516	-3.04288	0.24923	-12.2091	1.00125e-10	0
chr1_109896600_109897200	0.756926	0.296878	0.0309793	0.0650138	-1.04861	-1.84763	0.209595	1.0011	0.84692	NA	NA	NA	NA	NA	NA	NA
chr1_109897200_109897800	0.521076	0.0134991	0.0831482	0.159602	-3.45463	-2.05193	0.248033	1.37894	1.17492	NA	NA	NA	NA	NA	NA	NA
chr1_109897800_109898400	0.282854	0.0125407	0.494419	0.295723	-3.65965	-0.841537	0.274199	1.44505	1.22803	NA	NA	NA	NA	NA	NA	NA
chr1_109898400_109899000	0.929366	0.0150856	0.513837	0.0244096	-3.55658	-0.794824	0.274825	1.44357	1.21401	NA	NA	NA	NA	NA	NA	NA
chr1_109900800_109901400	0.0846011	0.00385203	0.07209	-0.425448	-4.24155	-2.22685	0.244767	1.4407	1.22783	NA	NA	NA	NA	NA	NA	NA
chr1_109901400_109902000	0.879203	0.000393847	0.000133164	-0.0365455	2.1631	2.05464	0.23998	0.594099	0.521356	0.00541519	0.0102205	0.108459	0.790421	0.137217	0.892231	0.0598277
chr1_10990200_10990800	0.28717	0.00675798	0.0086708	-0.244215	-3.84217	-3.15222	0.228488	1.39532	1.18234	NA	NA	NA	NA	NA	NA	NA
chr1_109902000_109902600	0.912977	0.0488761	0.046823	-0.0301592	1.6609	1.45403	0.275423	0.835149	0.724319	0.0328688	0.0789036	0.206874	1.10549	0.187133	0.853442	0.0572917
chr1_109905000_109905600	0.132439	0.266794	0.0320332	-0.367836	-1.28671	-2.14206	0.242913	1.15362	0.988105	NA	NA	NA	NA	NA	NA	NA
chr1_109905600_109906200	0.359432	0.149496	0.0359276	-0.20201	-1.53749	-1.9131	0.21963	1.06027	0.9023	NA	NA	NA	NA	NA	NA	NA
chr1_109906200_109906800	0.0723614	0.00478967	0.0409182	-0.43993	-4.09085	-2.50072	0.2428	1.42471	1.21078	NA	NA	NA	NA	NA	NA	NA
chr1_109906800_109907400	0.0757583	0.264999	0.0371829	-0.47987	-1.51435	-2.4329	0.268014	1.35259	1.1553	NA	NA	NA	NA	NA	NA	NA
chr1_10990800_10991400	0.172183	0.0278153	0.0112461	-0.31842	-2.88541	-2.84817	0.231923	1.29657	1.10717	NA	NA	NA	NA	NA	NA	NA
chr1_109909800_109910400	0.633462	0.0380333	0.540468	-0.0792869	-1.64355	-0.415259	0.165868	0.784006	0.676578	NA	NA	NA	NA	NA	NA	NA
chr1_109910400_109911000	0.667718	0.0143059	0.689808	-0.0668703	-1.82773	-0.254829	0.15541	0.735904	0.63703	NA	NA	NA	NA	NA	NA	NA
chr1_109911000_109911600	0.846718	0.0121833	0.952893	-0.0359424	-2.23202	-0.0443697	0.185555	0.877647	0.7496	NA	NA	NA	NA	NA	NA	NA
chr1_109911600_109912200	0.265502	0.0196023	0.929386	-0.25853	-2.36178	0.0752479	0.231159	0.999135	0.847452	0.021545	0.576601	-2.43702	1.31013	-1.86014	0.0776375	0.00676813
chr1_109912200_109912800	0.437182	0.0746658	0.0922889	-0.204867	-2.40798	-1.94112	0.262846	1.3398	1.14437	NA	NA	NA	NA	NA	NA	NA
chr1_109913400_109914000	0.459065	0.0511464	0.00837034	-0.191958	-3.04063	-3.44177	0.258478	1.54437	1.28492	NA	NA	NA	NA	NA	NA	NA
chr1_10991400_10992000	0.307004	0.187043	8.24468e-05	0.232922	-1.84732	-4.81686	0.227097	1.3926	1.18389	NA	NA	NA	NA	NA	NA	NA
chr1_109914000_109914600	0.557427	0.440468	0.0559904	-0.150566	-0.88172	-1.88078	0.255968	1.13942	0.975127	NA	NA	NA	NA	NA	NA	NA
chr1_109915200_109915800	0.742909	0.00295674	0.033256	0.0809313	-4.58937	-2.69451	0.246202	1.51429	1.25187	NA	NA	NA	NA	NA	NA	NA
chr1_109917000_109917600	0.491958	0.0835761	0.0177878	0.176576	-2.47992	-2.91097	0.256207	1.42197	1.21228	NA	NA	NA	NA	NA	NA	NA
chr1_109917600_109918200	0.988258	0.122144	0.935611	-0.0041108	-1.89347	-0.084368	0.278771	1.21672	1.04226	NA	NA	NA	NA	NA	NA	NA
chr1_109918200_109918800	0.605053	0.175467	0.284721	-0.151691	-1.86032	-1.25566	0.292592	1.36543	1.16881	NA	NA	NA	NA	NA	NA	NA
chr1_109920600_109921200	0.696874	0.356306	0.000203571	0.074766	-0.981585	-3.44387	0.191498	1.06026	0.900243	NA	NA	NA	NA	NA	NA	NA
chr1_109921800_109922400	0.537599	0.0758363	0.000805289	-0.144849	-2.57122	-4.16776	0.234335	1.43645	1.21391	NA	NA	NA	NA	NA	NA	NA
chr1_109922400_109923000	0.927362	0.0649169	0.00512236	-0.0215025	-2.50931	-3.27756	0.235396	1.34767	1.15056	NA	NA	NA	NA	NA	NA	NA
chr1_109923000_109923600	0.777193	0.00900416	0.0710575	-0.0492022	-2.56687	-1.4901	0.173504	0.967661	0.81858	NA	NA	NA	NA	NA	NA	NA
chr1_109923600_109924200	0.809379	0.00144834	0.0534329	-0.0471839	-3.53511	-1.80869	0.195193	1.08571	0.927754	NA	NA	NA	NA	NA	NA	NA
chr1_109924200_109924800	0.427768	0.137024	0.0506259	0.200683	-1.85219	-2.08967	0.252253	1.23775	1.05895	NA	NA	NA	NA	NA	NA	NA
chr1_109925400_109926000	0.422185	0.0460384	0.148833	-0.217312	-2.84597	-1.75132	0.269872	1.41255	1.20575	NA	NA	NA	NA	NA	NA	NA
chr1_109927800_109928400	0.0773764	0.00669093	0.0228082	0.415455	-3.75911	-2.67993	0.233332	1.36344	1.16284	NA	NA	NA	NA	NA	NA	NA
chr1_109928400_109929000	0.0117053	0.0335654	0.00151953	0.535088	-2.645	-3.40927	0.209193	1.23106	1.05184	NA	NA	NA	NA	NA	NA	NA
chr1_109929000_109929600	0.0921751	0.00537265	0.218537	0.319237	-2.82323	-1.04203	0.188137	0.996738	0.842701	NA	NA	NA	NA	NA	NA	NA
chr1_109929600_109930200	0.575732	0.0141391	0.539456	0.117217	-2.46179	-0.515048	0.208914	0.989455	0.837066	NA	NA	NA	NA	NA	NA	NA
chr1_109930200_109930800	0.498628	0.0143482	0.279126	0.176769	-3.32717	-1.24447	0.260493	1.34023	1.14495	NA	NA	NA	NA	NA	NA	NA
chr1_109930800_109931400	0.371632	0.0409506	0.0236236	0.159406	-1.99556	-1.87202	0.177791	0.966351	0.817206	NA	NA	NA	NA	NA	NA	NA
chr1_109931400_109932000	0.575209	0.0571052	0.00756371	0.113216	-2.04821	-2.4713	0.201507	1.06681	0.910472	NA	NA	NA	NA	NA	NA	NA
chr1_109933800_109934400	0.611445	0.000598728	0.0848403	0.111858	-4.5161	-1.90205	0.219644	1.28283	1.09513	NA	NA	NA	NA	NA	NA	NA
chr1_109934400_109935000	0.0476897	0.00732997	0.386765	0.503292	-3.39845	-0.925978	0.251713	1.247	1.0662	NA	NA	NA	NA	NA	NA	NA
chr1_109935000_109935600	0.427605	0.489715	4.99038e-08	-0.212822	0.488496	3.57356	0.267416	0.70513	0.616256	0.177852	0.00529346	-3.08506	0.936472	-3.29434	0.0036231	0.00067647
chr1_109959600_109960200	0.0680931	0.0412745	0.0229626	-0.552322	-2.29615	2.19941	0.300167	1.11372	0.955447	0.0301801	0.0537365	-4.49556	1.4674	-3.06363	0.00612948	0.000982669
chr1_109961400_109962000	0.598169	0.302131	0.262203	0.152704	-1.39586	-1.29593	0.289014	1.34725	1.15071	NA	NA	NA	NA	NA	NA	NA
chr1_109975800_109976400	0.55505	0.339605	0.176867	0.186467	-1.11315	1.35289	0.315096	1.16129	0.996234	0.127246	0.181955	-2.46604	1.53006	-1.61173	0.12269	0.00981884
chr1_109977600_109978200	0.615623	0.0290172	0.598323	-0.0882322	-1.8347	-0.376145	0.175307	0.830826	0.712209	NA	NA	NA	NA	NA	NA	NA
chr1_109978200_109978800	0.668321	0.441462	0.012646	-0.0733462	-0.668504	-1.86763	0.17079	0.865776	0.738354	NA	NA	NA	NA	NA	NA	NA
chr1_109978800_109979400	0.186074	0.925421	0.843505	-0.320738	0.0863527	-0.15558	0.241252	0.920667	0.786489	0.313002	0.55167	0.241933	1.21086	0.199802	0.843653	0.0566599
chr1_109979400_109980000	0.97046	0.0684048	0.115284	0.00911109	-1.74012	1.2777	0.245555	0.946773	0.805748	0.0393571	0.135796	-3.01782	1.24322	-2.42741	0.0247743	0.00279883
chr1_109981800_109982400	0.975997	0.227988	0.00493541	-0.00763444	-1.63623	-3.29988	0.253245	1.35069	1.15331	NA	NA	NA	NA	NA	NA	NA
chr1_109982400_109983000	0.346856	0.00936784	0.120338	-0.254876	-4.08307	-2.0009	0.269937	1.54749	1.27947	NA	NA	NA	NA	NA	NA	NA
chr1_109983000_109983600	0.467481	0.0156172	0.00368414	-0.162358	-3.32967	-3.42823	0.222783	1.35866	1.15865	NA	NA	NA	NA	NA	NA	NA
chr1_109983600_109984200	0.383659	0.000191345	0.00874463	-0.163977	-4.86307	-2.87563	0.187574	1.26561	1.07982	NA	NA	NA	NA	NA	NA	NA
chr1_109984200_109984800	0.602042	0.0365509	0.365513	-0.0720152	-1.3832	-0.516632	0.137756	0.654599	0.568879	NA	NA	NA	NA	NA	NA	NA
chr1_109984800_109985400	0.160785	0.0768319	0.861543	-0.282364	-1.60572	-0.134643	0.200164	0.900141	0.77043	NA	NA	NA	NA	NA	NA	NA
chr1_109994400_109995000	0.880087	0.0288674	0.00802587	0.03838	-3.35168	-3.37474	0.253899	1.51634	1.25295	NA	NA	NA	NA	NA	NA	NA
chr1_110031000_110031600	0.378712	0.16687	0.568452	-0.291633	-1.90485	0.669701	0.330142	1.37012	1.17117	0.0709993	0.43132	-2.57456	1.80246	-1.42836	0.16862	0.0127939
chr1_110034000_110034600	0.0128398	0.130955	0.503433	0.811041	-2.35868	-0.889097	0.321352	1.5516	1.32502	NA	NA	NA	NA	NA	NA	NA
chr1_110034600_110035200	0.269915	0.233213	0.215339	0.206823	-1.03706	-0.921582	0.186648	0.865783	0.740093	NA	NA	NA	NA	NA	NA	NA
chr1_110035200_110035800	0.69322	0.0150232	0.0484356	0.0812495	-2.62937	-1.81003	0.205494	1.06655	0.90833	NA	NA	NA	NA	NA	NA	NA
chr1_110035800_110036400	0.849049	0.373107	0.0190973	0.0554277	-1.39925	-3.14613	0.290623	1.56547	1.32529	NA	NA	NA	NA	NA	NA	NA
chr1_110038200_110038800	0.912393	0.00195415	0.104653	-0.0258214	-4.23203	-1.8651	0.234228	1.33804	1.14117	NA	NA	NA	NA	NA	NA	NA
chr1_110040600_110041200	0.699344	0.000299659	0.288661	-0.0914649	-4.91237	-1.2009	0.236295	1.32118	1.12706	NA	NA	NA	NA	NA	NA	NA
chr1_110043000_110043600	0.151206	0.198326	0.000873969	0.321905	-1.58392	-3.57118	0.22293	1.22492	1.04757	NA	NA	NA	NA	NA	NA	NA
chr1_110043600_110044200	0.424696	0.0035802	0.0160604	0.183106	-4.12605	-2.88567	0.228632	1.39007	1.18259	NA	NA	NA	NA	NA	NA	NA
chr1_110044800_110045400	0.054316	0.222105	0.00245817	0.464757	-1.5648	-3.36771	0.239286	1.27535	1.08983	NA	NA	NA	NA	NA	NA	NA
chr1_110049600_110050200	0.566062	0.00971522	0.212454	-0.142691	-3.42198	-1.39432	0.248001	1.30339	1.11266	NA	NA	NA	NA	NA	NA	NA
chr1_110050200_110050800	0.959427	0.103851	0.00037187	-0.00931007	-1.72371	-3.27419	0.182649	1.05219	0.895251	NA	NA	NA	NA	NA	NA	NA
chr1_110050800_110051400	0.658482	0.0238427	0.00464404	0.0886132	-2.59284	-2.79475	0.200007	1.13368	0.969814	NA	NA	NA	NA	NA	NA	NA
chr1_110052600_110053200	0.26487	0.0243272	0.0807954	0.295774	-3.36844	-2.20104	0.264109	1.47796	1.25052	NA	NA	NA	NA	NA	NA	NA
chr1_110053200_110053800	0.987995	0.00107468	0.123711	-0.00345716	-4.25799	-1.68387	0.229304	1.27218	1.08661	NA	NA	NA	NA	NA	NA	NA
chr1_110053800_110054400	0.594159	0.00884508	0.128887	-0.133268	-3.52319	-1.72927	0.249487	1.325	1.13139	NA	NA	NA	NA	NA	NA	NA
chr1_110056800_110057400	0.678843	0.0942251	0.0275872	-0.107265	-2.3954	-2.67992	0.258471	1.42066	1.20243	NA	NA	NA	NA	NA	NA	NA
chr1_110057400_110058000	0.0414466	0.374504	0.0164196	-0.501805	-1.02399	-2.39343	0.243604	1.149	0.984246	NA	NA	NA	NA	NA	NA	NA
chr1_11005800_11006400	0.579659	0.0902744	0.116895	0.143979	-2.26047	-1.7844	0.259277	1.32428	1.13032	NA	NA	NA	NA	NA	NA	NA
chr1_110058600_110059200	0.891515	0.000691052	0.0501036	-0.0313501	-4.92717	-2.38009	0.2294	1.41647	1.20335	NA	NA	NA	NA	NA	NA	NA
chr1_110059200_110059800	0.489495	0.00867826	0.021537	0.166143	-3.80152	-2.82879	0.239702	1.42605	1.21555	NA	NA	NA	NA	NA	NA	NA
chr1_110059800_110060400	0.15897	0.149786	0.031586	0.349878	-1.78467	-2.29002	0.246939	1.23162	1.05355	NA	NA	NA	NA	NA	NA	NA
chr1_110060400_110061000	0.968862	0.312795	0.0492284	-0.00856975	-1.0337	-1.71606	0.219102	1.02004	0.864249	NA	NA	NA	NA	NA	NA	NA
chr1_110061000_110061600	0.124206	0.212774	0.0367824	-0.372121	-1.42179	-2.05254	0.240451	1.13538	0.972579	NA	NA	NA	NA	NA	NA	NA
chr1_110061600_110062200	0.829672	0.314767	0.00814955	-0.0567127	-1.42035	-3.22655	0.263087	1.40731	1.20033	NA	NA	NA	NA	NA	NA	NA
chr1_110062800_110063400	0.879686	0.15431	0.0335711	0.0283203	-1.3392	-1.69884	0.186721	0.934539	0.790715	NA	NA	NA	NA	NA	NA	NA
chr1_110063400_110064000	0.742762	0.137894	0.252002	0.0624811	-1.34319	-0.88091	0.189962	0.899611	0.765521	NA	NA	NA	NA	NA	NA	NA
chr1_110064600_110065200	0.410533	0.00159766	0.0554676	-0.183146	-4.13449	-2.11505	0.221812	1.28172	1.09422	NA	NA	NA	NA	NA	NA	NA
chr1_110065800_110066400	0.402355	0.0624217	0.00410021	0.19242	-2.39766	-3.18467	0.229009	1.27548	1.08938	NA	NA	NA	NA	NA	NA	NA
chr1_110066400_110067000	0.651199	0.0745402	0.0477123	-0.113809	-2.2763	-2.16416	0.25114	1.26598	1.08248	NA	NA	NA	NA	NA	NA	NA
chr1_110067000_110067600	0.116661	0.101299	0.0755261	-0.258591	-1.38928	-1.2947	0.163697	0.841707	0.722524	NA	NA	NA	NA	NA	NA	NA
chr1_110067600_110068200	0.678132	0.0277247	0.309664	0.0625121	-1.65163	-0.655475	0.15028	0.741725	0.64262	NA	NA	NA	NA	NA	NA	NA
chr1_110068200_110068800	0.952758	0.00233684	0.62026	0.00962975	-2.62958	-0.362103	0.162226	0.846534	0.72902	NA	NA	NA	NA	NA	NA	NA
chr1_110068800_110069400	0.640404	0.102129	0.0126368	-0.0801199	-1.53237	-1.99625	0.171103	0.930679	0.789117	NA	NA	NA	NA	NA	NA	NA
chr1_110069400_110070000	0.377369	0.541	0.237594	0.132093	-0.392848	-0.66128	0.149114	0.640907	0.557286	NA	NA	NA	NA	NA	NA	NA
chr1_110070000_110070600	0.146521	0.00971032	0.137366	0.330261	-2.92808	-1.42746	0.226073	1.11519	0.954761	NA	NA	NA	NA	NA	NA	NA
chr1_110070600_110071200	0.287062	0.00757356	0.127595	0.267023	-3.77225	-1.81583	0.24977	1.39	1.18398	NA	NA	NA	NA	NA	NA	NA
chr1_110078400_110079000	0.164039	0.0514225	0.304276	-0.371093	-2.60843	-1.16813	0.265124	1.32645	1.13248	NA	NA	NA	NA	NA	NA	NA
chr1_110082600_110083200	0.716914	0.0133602	0.014901	-0.075964	-2.8911	-2.4337	0.20904	1.15224	0.985951	NA	NA	NA	NA	NA	NA	NA
chr1_110083200_110083800	0.516521	0.0020837	0.00599747	-0.128814	-3.94136	-2.99419	0.198012	1.25416	1.07132	NA	NA	NA	NA	NA	NA	NA
chr1_110083800_110084400	0.499617	4.965e-05	0.0229609	0.121998	-4.89934	-2.29448	0.180196	1.16626	0.996732	NA	NA	NA	NA	NA	NA	NA
chr1_110084400_110085000	0.107608	0.00178834	0.0474185	0.322247	-3.50593	-1.88042	0.19886	1.09881	0.939294	NA	NA	NA	NA	NA	NA	NA
chr1_110086200_110086800	0.83266	0.271807	0.00380813	0.0532359	-1.52887	-3.48005	0.251437	1.38522	1.18053	NA	NA	NA	NA	NA	NA	NA
chr1_110088600_110089200	0.656457	0.0519437	0.00118159	0.0952388	-2.39643	-3.46323	0.213607	1.2214	1.04368	NA	NA	NA	NA	NA	NA	NA
chr1_110089200_110089800	0.123088	0.501589	0.824326	0.282262	-0.477893	0.137012	0.181841	0.70913	0.615944	0.181835	0.545196	-0.614905	0.939283	-0.654653	0.520149	0.0354233
chr1_110089800_110090400	0.465682	0.0133487	0.505019	0.126866	-1.89581	0.437826	0.17338	0.755471	0.654928	0.0183608	0.39606	-2.33364	0.999833	-2.33403	0.0301389	0.00324111
chr1_110094000_110094600	0.69979	0.0074561	0.0699603	0.094855	-3.72113	-2.13412	0.245435	1.3684	1.16774	NA	NA	NA	NA	NA	NA	NA
chr1_110097000_110097600	0.530335	0.000624295	0.599707	-0.138941	-3.80749	-0.488071	0.220816	1.0853	0.927643	NA	NA	NA	NA	NA	NA	NA
chr1_110097600_110098200	0.427257	0.0697659	0.552334	-0.182226	-1.75416	0.486285	0.228798	0.959163	0.816119	0.0398046	0.422599	-2.24045	1.25938	-1.77901	0.090443	0.00765781
chr1_110098200_110098800	0.649243	0.730594	0.0665614	-0.116135	-0.384901	-1.76578	0.25474	1.11535	0.954213	NA	NA	NA	NA	NA	NA	NA
chr1_110101200_110101800	0.379329	0.0187217	0.0202412	-0.206652	-3.1285	-2.6363	0.234243	1.31363	1.12117	NA	NA	NA	NA	NA	NA	NA
chr1_110101800_110102400	0.913255	0.00275256	0.0967541	0.0222439	-3.38199	-1.58059	0.20379	1.10746	0.944673	NA	NA	NA	NA	NA	NA	NA
chr1_110102400_110103000	0.647027	0.000793078	0.0154931	-0.0981823	-4.77347	-2.90418	0.213911	1.3885	1.18359	NA	NA	NA	NA	NA	NA	NA
chr1_110103000_110103600	0.740261	0.000878177	0.020313	0.0702057	-4.53221	-2.66537	0.211316	1.33004	1.1342	NA	NA	NA	NA	NA	NA	NA
chr1_110104800_110105400	0.124475	0.0339575	0.497883	-0.454892	-3.17807	-0.860386	0.294148	1.48249	1.26569	NA	NA	NA	NA	NA	NA	NA
chr1_110106000_110106600	0.629387	0.923227	0.00136903	-0.0774276	-0.078821	-2.29365	0.160053	0.816276	0.700705	NA	NA	NA	NA	NA	NA	NA
chr1_110106600_110107200	0.882712	0.572255	9.91663e-05	0.0229679	-0.503455	-3.04151	0.155369	0.889181	0.756629	NA	NA	NA	NA	NA	NA	NA
chr1_110107200_110107800	0.572796	0.0652655	0.00620956	0.126114	-2.24481	-2.87126	0.223051	1.2072	1.03175	NA	NA	NA	NA	NA	NA	NA
chr1_110109600_110110200	0.353563	0.241646	7.31153e-10	0.23339	-0.767372	3.80889	0.250658	0.652323	0.571627	0.0950589	0.00428701	-4.57626	0.867343	-5.27618	3.65484e-05	5.71441e-05
chr1_110110200_110110800	0.97381	0.159078	5.0092e-10	-0.00822566	-0.930837	3.87859	0.250057	0.657145	0.575627	0.0684996	0.00424746	-4.80943	0.873605	-5.50527	2.17636e-05	4.20832e-05
chr1_110112600_110113200	0.797154	0.0307256	0.0047039	-0.0486686	-2.26416	-2.52992	0.188952	1.03625	0.879228	NA	NA	NA	NA	NA	NA	NA
chr1_110113200_110113800	0.41143	0.781657	0.00760753	0.112143	-0.178316	-1.51157	0.13608	0.642008	0.557304	NA	NA	NA	NA	NA	NA	NA
chr1_110113800_110114400	0.0300906	0.21884	0.000502178	-0.502183	-1.61304	-3.97971	0.228943	1.30534	1.11433	NA	NA	NA	NA	NA	NA	NA
chr1_11011800_11012400	0.101221	0.0018094	0.190863	0.356089	-3.61136	-1.27438	0.21569	1.13316	0.969085	NA	NA	NA	NA	NA	NA	NA
chr1_110118600_110119200	0.00971746	0.208038	0.0348955	0.702572	-1.77813	-2.55542	0.26761	1.40518	1.19837	NA	NA	NA	NA	NA	NA	NA
chr1_110119800_110120400	0.00827831	0.879254	0.00461835	0.693812	0.181493	-2.94559	0.258643	1.1923	1.0215	0.300632	0.0258655	3.12709	1.57004	1.99172	0.0602347	0.0055312
chr1_110121000_110121600	0.895379	0.0678682	0.00720379	-0.0269413	-1.94848	-2.46221	0.204465	1.05805	0.901454	NA	NA	NA	NA	NA	NA	NA
chr1_110123400_110124000	0.193181	0.0399882	0.19454	0.381798	-3.25248	-1.69244	0.29186	1.56734	1.29774	NA	NA	NA	NA	NA	NA	NA
chr1_11012400_11013000	0.721556	0.785171	0.00674993	-0.0556559	0.133286	1.17939	0.155824	0.487936	0.428241	0.273562	0.0303024	-1.0461	0.649209	-1.61135	0.122772	0.009824
chr1_110127000_110127600	0.357883	0.152048	0.00460083	0.228141	-1.98558	-3.38061	0.247239	1.37794	1.17184	NA	NA	NA	NA	NA	NA	NA
chr1_110129400_110130000	0.501228	0.00432456	0.708177	0.123203	-2.6149	-0.286712	0.182662	0.899944	0.764269	NA	NA	NA	NA	NA	NA	NA
chr1_11013000_11013600	0.347432	0.0339153	0.567625	0.223975	-2.13891	0.484314	0.237495	0.997508	0.845157	0.0274961	0.430905	-2.62322	1.30741	-2.00643	0.0585224	0.00540997
chr1_110130000_110130600	0.348933	0.00402917	0.909966	-0.176325	-2.62243	0.0863535	0.187553	0.895275	0.762125	0.0116032	0.571709	-2.70878	1.17573	-2.3039	0.0320866	0.00340371
chr1_110133600_110134200	0.387708	0.0857033	0.200269	-0.241235	-2.51537	-1.57753	0.27832	1.45231	1.22529	NA	NA	NA	NA	NA	NA	NA
chr1_110134200_110134800	0.469903	0.104084	0.0447879	0.189242	-2.25551	-2.38235	0.261094	1.37775	1.1755	NA	NA	NA	NA	NA	NA	NA
chr1_110134800_110135400	0.904139	0.183917	0.000600002	0.0247136	-1.4785	-3.33151	0.204795	1.10661	0.946505	NA	NA	NA	NA	NA	NA	NA
chr1_110135400_110136000	0.539712	0.0614867	0.0128809	-0.113025	-1.88371	-2.12923	0.183807	0.998438	0.844041	NA	NA	NA	NA	NA	NA	NA
chr1_110137200_110137800	0.66893	0.0432206	0.627747	-0.110485	-2.32921	-0.474334	0.257774	1.14066	0.975834	NA	NA	NA	NA	NA	NA	NA
chr1_110149800_110150400	0.659805	0.00138978	0.575389	0.106839	-3.94688	-0.579843	0.242147	1.20747	1.03252	NA	NA	NA	NA	NA	NA	NA
chr1_110150400_110151000	0.136291	0.000142047	0.541451	-0.257157	-3.69702	-0.488233	0.171525	0.942266	0.797412	NA	NA	NA	NA	NA	NA	NA
chr1_110151000_110151600	0.976593	0.004975	0.189432	-0.00565086	-2.89009	-1.12768	0.192214	1.01104	0.854741	NA	NA	NA	NA	NA	NA	NA
chr1_110151600_110152200	0.856721	0.0252915	0.550508	0.0342101	-2.05793	-0.463329	0.189094	0.909129	0.774028	NA	NA	NA	NA	NA	NA	NA
chr1_110152200_110152800	0.411799	0.0392882	0.305539	0.154678	-1.59654	0.682073	0.187844	0.766595	0.662995	0.0294679	0.272033	-2.27861	1.01352	-2.24821	0.0359964	0.00372095
chr1_110158800_110159400	0.0131306	0.0782405	0.694602	-0.757576	-2.32602	0.440984	0.301157	1.31021	1.12064	0.042605	0.493251	-2.76701	1.72409	-1.60491	0.12419	0.00991931
chr1_110159400_110160000	0.221556	0.0552563	0.669651	0.341611	-2.54261	-0.480219	0.278088	1.31426	1.123	NA	NA	NA	NA	NA	NA	NA
chr1_110161800_110162400	0.479402	0.0663785	0.0158925	0.180137	-2.62534	-2.95517	0.253944	1.41775	1.2091	NA	NA	NA	NA	NA	NA	NA
chr1_110162400_110163000	0.193782	0.0566157	0.0112761	0.293565	-2.24695	-2.57024	0.224716	1.16798	0.999506	NA	NA	NA	NA	NA	NA	NA
chr1_110163600_110164200	0.992446	0.065218	0.0404886	-0.00221189	-2.13187	-2.03138	0.233163	1.14626	0.981403	NA	NA	NA	NA	NA	NA	NA
chr1_110164800_110165400	0.309535	0.0575177	0.00258042	-0.243243	-2.7061	-3.66138	0.238409	1.41184	1.19085	NA	NA	NA	NA	NA	NA	NA
chr1_110165400_110166000	0.208053	0.0124514	0.0729817	-0.304066	-3.23007	-1.96705	0.240298	1.2741	1.08801	NA	NA	NA	NA	NA	NA	NA
chr1_110166000_110166600	0.813344	0.00541922	0.0801712	0.0598981	-4.24087	-2.18592	0.253156	1.49879	1.23934	NA	NA	NA	NA	NA	NA	NA
chr1_110166600_110167200	0.713258	0.000464	0.000893502	-0.0643207	-4.54802	-3.67278	0.17464	1.2654	1.07946	NA	NA	NA	NA	NA	NA	NA
chr1_110170800_110171400	0.910832	0.034442	0.00373333	0.0245491	-2.64831	-3.12604	0.218773	1.23877	1.05808	NA	NA	NA	NA	NA	NA	NA
chr1_110171400_110172000	0.878528	0.000206541	0.00306731	0.0284102	-5.02702	-3.38412	0.185514	1.31546	1.12102	NA	NA	NA	NA	NA	NA	NA
chr1_110172000_110172600	0.738035	0.00320832	0.0905281	0.0780368	-3.79922	-1.84222	0.232815	1.26466	1.08012	NA	NA	NA	NA	NA	NA	NA
chr1_110173800_110174400	0.191502	0.0254544	0.0148144	0.333915	-3.4309	-3.11179	0.254288	1.51738	1.25955	NA	NA	NA	NA	NA	NA	NA
chr1_110174400_110175000	0.62507	0.0282282	0.244689	-0.105897	-2.32727	-1.03829	0.216174	1.04857	0.888373	NA	NA	NA	NA	NA	NA	NA
chr1_110175000_110175600	0.796166	0.0371316	0.326174	-0.0564878	-2.14109	-0.848415	0.218222	1.01645	0.860762	NA	NA	NA	NA	NA	NA	NA
chr1_110176200_110176800	0.204884	0.0213181	0.0254165	0.237194	-2.38994	-1.96153	0.186138	1.02521	0.867298	NA	NA	NA	NA	NA	NA	NA
chr1_110184600_110185200	0.585838	0.0903139	0.000430577	-0.121562	-2.2626	-4.08927	0.222531	1.3257	1.13102	NA	NA	NA	NA	NA	NA	NA
chr1_110185200_110185800	0.320066	0.0822213	0.000757957	-0.161595	-1.70594	-2.84114	0.161882	0.973828	0.823219	NA	NA	NA	NA	NA	NA	NA
chr1_110189400_110190000	0.471216	0.0481954	0.158667	-0.193589	-2.81468	-1.70662	0.267884	1.41096	1.20363	NA	NA	NA	NA	NA	NA	NA
chr1_110190000_110190600	0.486218	0.2883	0.173366	0.181634	-1.24455	-1.3695	0.260082	1.16715	1.00026	NA	NA	NA	NA	NA	NA	NA
chr1_110190600_110191200	0.569349	0.0319638	0.0128878	0.137175	-2.97364	-2.94917	0.24045	1.37114	1.16916	NA	NA	NA	NA	NA	NA	NA
chr1_110192400_110193000	0.223064	0.000835137	0.00749124	-0.215226	-3.72421	-2.52399	0.17578	1.08815	0.928728	NA	NA	NA	NA	NA	NA	NA
chr1_110194800_110195400	0.52237	0.010474	0.000979639	0.122472	-3.07879	-3.41777	0.190923	1.18492	1.01271	NA	NA	NA	NA	NA	NA	NA
chr1_110195400_110196000	0.156733	0.00561274	0.0822957	0.32219	-3.37486	-1.79533	0.226167	1.19779	1.02511	NA	NA	NA	NA	NA	NA	NA
chr1_110196000_110196600	0.613591	0.148187	0.00377839	0.124709	-1.99447	-3.44978	0.246362	1.37095	1.16923	NA	NA	NA	NA	NA	NA	NA
chr1_110197200_110197800	0.466796	0.0272508	0.000117667	-0.15319	-3.20131	-4.79504	0.209879	1.43319	1.20655	NA	NA	NA	NA	NA	NA	NA
chr1_110197800_110198400	0.851365	0.000621074	0.402784	-0.0288254	-3.00679	-0.616304	0.153523	0.8567	0.734162	NA	NA	NA	NA	NA	NA	NA
chr1_110198400_110199000	0.760456	0.0138708	0.0145466	-0.0649925	-2.98457	-2.53445	0.212715	1.19614	1.02303	NA	NA	NA	NA	NA	NA	NA
chr1_110199000_110199600	0.183709	0.274106	0.0103374	-0.261384	-1.09145	-2.18726	0.195545	0.993673	0.840262	NA	NA	NA	NA	NA	NA	NA
chr1_110200200_110200800	0.732007	0.0323599	0.145999	0.090684	-3.07313	-1.77166	0.264223	1.42034	1.21117	NA	NA	NA	NA	NA	NA	NA
chr1_110200800_110201400	0.433906	0.00174617	0.529093	0.188604	-3.78483	-0.639475	0.240256	1.18346	1.01323	NA	NA	NA	NA	NA	NA	NA
chr1_110203800_110204400	0.231542	0.00229999	0.075693	-0.302678	-4.8009	-2.28881	0.251782	1.54303	1.27804	NA	NA	NA	NA	NA	NA	NA
chr1_110208000_110208600	0.408403	0.00989124	0.110616	-0.170951	-2.73815	-1.43016	0.206102	1.0455	0.890165	NA	NA	NA	NA	NA	NA	NA
chr1_110209200_110209800	0.999401	0.21335	0.0844604	0.000135603	-1.10648	-1.31786	0.180306	0.884708	0.757837	NA	NA	NA	NA	NA	NA	NA
chr1_110209800_110210400	0.804457	0.101577	0.0727423	-0.0429565	-1.45702	-1.36719	0.173141	0.883477	0.755583	NA	NA	NA	NA	NA	NA	NA
chr1_110210400_110211000	0.0159046	0.000366135	0.5328	0.529006	-3.90234	-0.570728	0.216467	1.06572	0.912514	NA	NA	NA	NA	NA	NA	NA
chr1_110211000_110211600	0.801866	0.0127075	0.669946	0.0390697	-1.8726	-0.273988	0.155373	0.740841	0.641337	NA	NA	NA	NA	NA	NA	NA
chr1_110211600_110212200	0.963245	0.0480685	0.307258	0.00762779	-1.59692	-0.705498	0.165199	0.800053	0.688217	NA	NA	NA	NA	NA	NA	NA
chr1_110212200_110212800	0.0548889	0.113066	0.0110865	0.365793	-1.58666	-2.16701	0.188787	0.994414	0.840678	NA	NA	NA	NA	NA	NA	NA
chr1_110212800_110213400	0.158725	0.0615516	0.000815436	0.34667	-2.79506	-4.19907	0.24453	1.48186	1.22436	NA	NA	NA	NA	NA	NA	NA
chr1_110213400_110214000	0.339224	0.189186	0.00787673	0.245747	-1.86913	-3.2554	0.256171	1.41594	1.20568	NA	NA	NA	NA	NA	NA	NA
chr1_110214000_110214600	0.811426	0.0567645	0.104146	0.0561489	-2.16198	-1.576	0.234851	1.1245	0.962858	NA	NA	NA	NA	NA	NA	NA
chr1_110214600_110215200	0.622389	0.0720851	0.0276709	-0.101806	-1.89894	-1.98148	0.206222	1.04701	0.889546	NA	NA	NA	NA	NA	NA	NA
chr1_110215200_110215800	0.481647	0.0456174	0.00621437	0.167041	-2.73421	-3.21406	0.236693	1.35441	1.15505	NA	NA	NA	NA	NA	NA	NA
chr1_110215800_110216400	0.824034	0.132651	0.00638846	-0.0487166	-1.71566	-2.69082	0.218638	1.13362	0.970332	NA	NA	NA	NA	NA	NA	NA
chr1_110216400_110217000	0.749424	0.0600824	0.0125934	-0.0765767	-2.47162	-2.81613	0.239234	1.30284	1.11266	NA	NA	NA	NA	NA	NA	NA
chr1_110217000_110217600	0.00509774	0.242343	8.05047e-05	0.609534	-1.42911	-4.23612	0.21385	1.21666	1.03955	NA	NA	NA	NA	NA	NA	NA
chr1_110217600_110218200	0.000818106	0.582064	2.50134e-05	0.742207	-0.65188	-4.42083	0.216473	1.1814	1.01039	NA	NA	NA	NA	NA	NA	NA
chr1_110219400_110220000	0.0308275	0.0658825	0.000752373	0.518283	-2.70206	-4.24871	0.237353	1.45647	1.23029	NA	NA	NA	NA	NA	NA	NA
chr1_110221200_110221800	0.632164	0.0212304	0.015186	-0.110971	-3.02227	-2.72113	0.231266	1.29557	1.10559	NA	NA	NA	NA	NA	NA	NA
chr1_110221800_110222400	0.43899	0.21888	0.00106374	0.188414	-1.6792	-3.88415	0.242695	1.359	1.15942	NA	NA	NA	NA	NA	NA	NA
chr1_110222400_110223000	0.367301	0.0918603	0.00442582	-0.217302	-2.32285	-3.37949	0.240176	1.36759	1.16619	NA	NA	NA	NA	NA	NA	NA
chr1_110223000_110223600	0.753166	0.00795899	0.325304	-0.0560688	-2.48553	-0.772965	0.177912	0.921797	0.782799	NA	NA	NA	NA	NA	NA	NA
chr1_110223600_110224200	0.769437	0.0674226	0.651261	-0.0616652	-1.73317	-0.361364	0.209933	0.939591	0.797566	NA	NA	NA	NA	NA	NA	NA
chr1_110224200_110224800	0.165229	0.298939	0.727154	-0.372822	-1.14341	-0.327045	0.267117	1.0963	0.935258	NA	NA	NA	NA	NA	NA	NA
chr1_110224800_110225400	0.186691	0.0948228	0.0298575	0.313107	-1.96095	-2.1909	0.235846	1.16513	0.997377	NA	NA	NA	NA	NA	NA	NA
chr1_110225400_110226000	0.478692	2.02928e-07	0.207684	-0.125776	-6.31111	-1.24203	0.177024	1.14811	0.980754	NA	NA	NA	NA	NA	NA	NA
chr1_110226000_110226600	0.544244	6.65537e-06	0.352315	-0.109553	-4.8604	-0.820811	0.180174	1.03411	0.879253	NA	NA	NA	NA	NA	NA	NA
chr1_110227200_110227800	0.506579	0.0836753	0.0051293	0.151943	-2.12241	-2.96631	0.228122	1.21737	1.04147	NA	NA	NA	NA	NA	NA	NA
chr1_110227800_110228400	0.472552	0.0309094	0.0109363	0.155949	-2.54157	-2.57414	0.216451	1.16452	0.996703	NA	NA	NA	NA	NA	NA	NA
chr1_110228400_110229000	0.358653	0.10936	0.00293043	0.180039	-1.69896	-2.71703	0.195424	1.0537	0.895646	NA	NA	NA	NA	NA	NA	NA
chr1_110229000_110229600	0.601555	0.0017087	0.203596	0.122772	-4.0419	-1.37634	0.234534	1.26118	1.07699	NA	NA	NA	NA	NA	NA	NA
chr1_110229600_110230200	0.798895	0.000140245	0.0213708	-0.0370009	-3.75269	-1.88096	0.144925	0.955614	0.807208	NA	NA	NA	NA	NA	NA	NA
chr1_110230200_110230800	0.628207	0.000123155	0.00702549	0.0770929	-4.21709	-2.48465	0.158814	1.06439	0.906769	NA	NA	NA	NA	NA	NA	NA
chr1_110230800_110231400	0.29299	0.0340051	0.0288277	-0.22997	-2.42679	-2.14284	0.217784	1.13234	0.969197	NA	NA	NA	NA	NA	NA	NA
chr1_110231400_110232000	0.214576	0.0029631	0.0343141	-0.282964	-4.09772	-2.46772	0.22686	1.35238	1.15346	NA	NA	NA	NA	NA	NA	NA
chr1_110232000_110232600	0.304643	0.00259467	0.0557575	-0.235972	-4.01231	-2.15218	0.228946	1.30574	1.11477	NA	NA	NA	NA	NA	NA	NA
chr1_110232600_110233200	0.273359	0.13582	0.00398523	0.266756	-2.01057	-3.35044	0.242479	1.33944	1.14239	NA	NA	NA	NA	NA	NA	NA
chr1_110233200_110233800	0.114057	0.469335	0.173678	0.443997	-0.75174	1.20206	0.27904	1.03583	0.878605	0.170871	0.179644	-1.9538	1.35827	-1.43845	0.165772	0.0126105
chr1_110233800_110234400	0.31475	0.0870313	0.545654	0.251433	-1.75419	0.522583	0.249118	1.01716	0.862474	0.0454852	0.418782	-2.27678	1.3336	-1.70724	0.103256	0.00853278
chr1_110234400_110235000	0.0962733	0.00352961	0.0926631	0.394006	-3.75626	-1.82831	0.235143	1.2635	1.07912	NA	NA	NA	NA	NA	NA	NA
chr1_110235000_110235600	0.275123	4.36856e-05	0.146226	-0.232354	-5.32839	-1.57005	0.211989	1.25853	1.07396	NA	NA	NA	NA	NA	NA	NA
chr1_110235600_110236200	0.37457	0.215687	0.190198	0.242376	-1.58652	-1.43673	0.272003	1.27505	1.09089	NA	NA	NA	NA	NA	NA	NA
chr1_110238600_110239200	0.421926	0.201974	0.00264928	-0.209272	-1.93076	-3.87485	0.259742	1.50537	1.26375	NA	NA	NA	NA	NA	NA	NA
chr1_110239200_110239800	0.785968	0.295073	0.00246112	0.0695416	-1.51484	-3.73774	0.255551	1.44079	1.20972	NA	NA	NA	NA	NA	NA	NA
chr1_110239800_110240400	0.210358	0.00103444	0.525958	0.24701	-3.30979	-0.529972	0.196205	0.985494	0.833365	NA	NA	NA	NA	NA	NA	NA
chr1_110240400_110241000	0.673178	0.00223204	0.466761	0.0712221	-2.78892	-0.557465	0.168466	0.893636	0.763698	NA	NA	NA	NA	NA	NA	NA
chr1_110242800_110243400	0.042789	0.000262903	0.396168	-0.477736	-4.71997	-0.913971	0.233464	1.25707	1.07354	NA	NA	NA	NA	NA	NA	NA
chr1_110243400_110244000	0.307515	0.00497484	0.495861	-0.183654	-2.57514	-0.522529	0.179251	0.900856	0.765071	NA	NA	NA	NA	NA	NA	NA
chr1_110244000_110244600	0.215695	0.0211647	0.0412136	-0.327394	-3.62337	-2.66575	0.263124	1.55244	1.29259	NA	NA	NA	NA	NA	NA	NA
chr1_110251800_110252400	0.534648	0.0324838	0.0349277	-0.152275	-2.82008	-2.3743	0.244571	1.30433	1.11363	NA	NA	NA	NA	NA	NA	NA
chr1_110252400_110253000	0.930667	0.0404012	0.264746	-0.0228598	-2.71303	-1.25341	0.262218	1.31014	1.11893	NA	NA	NA	NA	NA	NA	NA
chr1_110253600_110254200	0.810239	0.164995	0.0169376	0.0623862	-1.98009	-2.91622	0.259275	1.41789	1.20508	NA	NA	NA	NA	NA	NA	NA
chr1_110255400_110256000	0.851716	0.251162	0.000913307	-0.0456645	-1.59353	-4.0024	0.243791	1.38234	1.17861	NA	NA	NA	NA	NA	NA	NA
chr1_110262600_110263200	0.0758415	0.00294228	0.0863689	-0.470579	-4.9343	-2.32568	0.2629	1.62725	1.34568	NA	NA	NA	NA	NA	NA	NA
chr1_110264400_110265000	0.269602	0.00293375	0.261755	-0.28625	-4.48674	-1.40062	0.258158	1.47919	1.2425	NA	NA	NA	NA	NA	NA	NA
chr1_110265600_110266200	0.200153	0.305303	0.00499269	0.354669	-1.57315	-3.60993	0.275406	1.5284	1.26339	NA	NA	NA	NA	NA	NA	NA
chr1_110266800_110267400	0.601171	0.0279552	0.000977645	0.120478	-3.19287	-4.05559	0.229908	1.43604	1.20149	NA	NA	NA	NA	NA	NA	NA
chr1_110272200_110272800	0.590166	0.180873	0.855468	-0.183096	-1.95619	0.226738	0.33909	1.45392	1.24229	0.0754822	0.555939	-2.18292	1.91237	-1.14147	0.267156	0.0190821
chr1_110278200_110278800	0.606386	0.0037767	0.0391261	0.120247	-3.99934	-2.40876	0.232801	1.35542	1.15562	NA	NA	NA	NA	NA	NA	NA
chr1_110278800_110279400	0.951371	0.023489	0.0300873	0.0144722	-2.94314	-2.40468	0.23684	1.28352	1.09626	NA	NA	NA	NA	NA	NA	NA
chr1_110281800_110282400	0.136196	0.778846	0.00430179	0.360018	-0.320301	-2.80568	0.240076	1.13816	0.965019	NA	NA	NA	NA	NA	NA	NA
chr1_110286600_110287200	0.40235	0.0318213	0.177492	-0.226356	-3.0898	-1.64649	0.269394	1.42349	1.2142	NA	NA	NA	NA	NA	NA	NA
chr1_110304000_110304600	0.15243	0.1741	0.0272972	0.400052	-2.12426	-2.87274	0.277886	1.55419	1.28649	NA	NA	NA	NA	NA	NA	NA
chr1_110307000_110307600	0.585359	0.213441	0.0104927	-0.135891	-1.63396	-2.89817	0.248444	1.30672	1.11568	NA	NA	NA	NA	NA	NA	NA
chr1_110309400_110310000	0.626509	0.156931	0.0128277	0.121791	-1.84502	-2.79409	0.249658	1.29577	1.10693	NA	NA	NA	NA	NA	NA	NA
chr1_110310000_110310600	0.829446	0.0425883	0.0127194	0.0506555	-2.62587	-2.76928	0.234672	1.28197	1.09574	NA	NA	NA	NA	NA	NA	NA
chr1_110310600_110311200	0.861996	0.108669	0.021585	-0.0462323	-2.33616	-2.87041	0.265419	1.44604	1.2339	NA	NA	NA	NA	NA	NA	NA
chr1_110311800_110312400	0.160981	0.148084	0.00086356	0.343644	-2.09047	-4.12115	0.243719	1.43657	1.20764	NA	NA	NA	NA	NA	NA	NA
chr1_110312400_110313000	0.952748	0.889664	0.000124393	0.013615	0.155771	-3.79971	0.229311	1.12059	0.959697	0.30353	0.0101328	3.95548	1.47538	2.68099	0.0143625	0.00185117
chr1_110317200_110317800	0.214859	0.0707328	0.000929055	-0.302289	-2.6797	-4.11926	0.242504	1.47036	1.21485	NA	NA	NA	NA	NA	NA	NA
chr1_11032200_11032800	0.648158	0.00314777	0.00108035	0.0994438	-4.39402	-4.03222	0.217407	1.45963	1.2053	NA	NA	NA	NA	NA	NA	NA
chr1_11033400_11034000	0.0177561	0.00866316	0.0212721	0.602031	-3.95911	-2.86128	0.250647	1.48482	1.22696	NA	NA	NA	NA	NA	NA	NA
chr1_110335200_110335800	0.337546	0.149801	0.921476	-0.282441	-1.81142	0.105714	0.293396	1.25013	1.07029	0.0655574	0.574734	-1.91714	1.6457	-1.16494	0.257752	0.0184933
chr1_110337600_110338200	0.962124	0.558715	0.13002	-0.0107535	0.545211	-1.20747	0.226001	0.929923	0.792363	0.200966	0.147155	1.75268	1.22172	1.43461	0.166852	0.0126796
chr1_110338200_110338800	0.540021	0.0347686	0.158187	0.104367	-1.89448	-1.07931	0.169856	0.887791	0.760319	NA	NA	NA	NA	NA	NA	NA
chr1_110338800_110339400	0.314575	0.000157759	0.260663	0.180047	-3.89298	-0.955198	0.178325	0.999447	0.845415	NA	NA	NA	NA	NA	NA	NA
chr1_110339400_110340000	0.469113	0.00370713	1.58616e-08	-0.165695	-1.99469	3.56315	0.228199	0.674621	0.589983	0.0112279	0.00488729	-5.55784	0.896211	-6.20148	4.66648e-06	1.7615e-05
chr1_1103400_1104000	0.521146	0.0519313	0.00819451	0.164037	-2.9819	-3.38372	0.254967	1.51972	1.25971	NA	NA	NA	NA	NA	NA	NA
chr1_11034000_11034600	0.044896	0.06902	0.115246	0.498718	-2.16321	-1.60145	0.246205	1.17962	1.0098	NA	NA	NA	NA	NA	NA	NA
chr1_110340000_110340600	0.418976	0.834301	1.1709e-11	-0.136883	-0.0889289	2.80154	0.168818	0.424242	0.375371	0.288097	0.00409307	-2.89047	0.566467	-5.10263	5.43105e-05	7.01399e-05
chr1_110340600_110341200	0.600309	0.014303	0.039598	-0.113188	-2.79889	-2.00554	0.215484	1.12689	0.964522	NA	NA	NA	NA	NA	NA	NA
chr1_110341200_110341800	0.493095	0.00752088	0.0638374	-0.111846	-2.5242	-1.47408	0.162714	0.929278	0.788443	NA	NA	NA	NA	NA	NA	NA
chr1_110341800_110342400	0.876921	0.0287793	0.0284318	0.0329682	-2.39274	-2.0496	0.212443	1.08189	0.924681	NA	NA	NA	NA	NA	NA	NA
chr1_11034600_11035200	0.0652449	0.189381	0.214693	0.529514	-1.83152	-1.47778	0.284737	1.38806	1.18508	NA	NA	NA	NA	NA	NA	NA
chr1_110346000_110346600	0.228659	0.0282287	0.473582	0.352463	-3.29596	-0.903829	0.291377	1.48503	1.25741	NA	NA	NA	NA	NA	NA	NA
chr1_110346600_110347200	0.879175	0.00106278	0.485278	-0.0396271	-3.97864	0.711687	0.260154	1.18753	1.01686	0.00739977	0.384639	-4.69032	1.5634	-3.00007	0.00707476	0.00109041
chr1_11038200_11038800	0.514413	0.207179	0.000646102	0.151587	-1.6644	-3.91788	0.231851	1.3128	1.11997	NA	NA	NA	NA	NA	NA	NA
chr1_110395800_110396400	0.260035	0.00519871	0.116224	0.25596	-3.30048	-1.57145	0.226242	1.16065	0.99358	NA	NA	NA	NA	NA	NA	NA
chr1_110396400_110397000	0.937925	0.17171	2.5897e-05	-0.0158853	-1.72955	-4.69173	0.203572	1.25833	1.07445	NA	NA	NA	NA	NA	NA	NA
chr1_1104000_1104600	0.490938	0.00285923	0.052773	0.161829	-4.09358	-2.24391	0.234256	1.34588	1.14776	NA	NA	NA	NA	NA	NA	NA
chr1_110407200_110407800	0.757423	0.0001135	0.297381	0.0540258	-3.34198	0.753859	0.17454	0.838885	0.72046	0.0038861	0.266571	-4.09584	1.1058	-3.70396	0.0014042	0.000349348
chr1_110407800_110408400	0.482614	0.00140518	0.157376	0.136339	-2.76136	1.03392	0.193617	0.845657	0.726918	0.00805676	0.167452	-3.79528	1.11514	-3.4034	0.00281916	0.000571267
chr1_110419200_110419800	0.027867	0.00541086	0.355357	-0.584307	-4.06359	-1.11293	0.262649	1.43587	1.19976	NA	NA	NA	NA	NA	NA	NA
chr1_110421000_110421600	0.227987	0.775651	0.0426055	0.388129	0.302664	1.8431	0.320396	1.05976	0.899893	0.270651	0.0748316	-1.54044	1.39028	-1.108	0.281009	0.0199735
chr1_110425800_110426400	0.823801	0.00237992	0.00578337	-0.0421571	-3.48355	-2.69834	0.188944	1.12356	0.961179	NA	NA	NA	NA	NA	NA	NA
chr1_110426400_110427000	0.0322801	0.717397	0.096273	-0.653266	-0.518608	-2.0425	0.301784	1.42967	1.21896	NA	NA	NA	NA	NA	NA	NA
chr1_110428200_110428800	0.201855	0.244522	0.00498446	0.319086	-1.51423	-3.16195	0.248719	1.29513	1.10639	NA	NA	NA	NA	NA	NA	NA
chr1_11043000_11043600	0.628187	0.00349649	0.00243708	0.0946193	-3.65575	-3.24505	0.194908	1.22841	1.0492	NA	NA	NA	NA	NA	NA	NA
chr1_110430000_110430600	0.956141	0.00119192	0.205138	-0.0138209	-3.52737	1.159	0.250809	1.06386	0.910037	0.00767036	0.202589	-4.68636	1.39999	-3.34744	0.00320706	0.000621694
chr1_110430600_110431200	0.521922	0.0123172	0.384189	0.156935	-2.60955	0.76006	0.244385	1.02772	0.870409	0.0177894	0.323524	-3.36961	1.34678	-2.50197	0.0211443	0.00247903
chr1_110431200_110431800	0.364474	0.000439313	0.00406596	0.17439	-4.76348	-3.29244	0.191609	1.31959	1.12517	NA	NA	NA	NA	NA	NA	NA
chr1_110433000_110433600	0.092945	0.318896	0.0935358	-0.45619	-1.31961	-1.90284	0.269491	1.31875	1.12614	NA	NA	NA	NA	NA	NA	NA
chr1_110433600_110434200	0.736405	0.0779007	0.205967	0.0898366	-2.3148	-1.41564	0.266296	1.30239	1.1136	NA	NA	NA	NA	NA	NA	NA
chr1_110434200_110434800	0.00443425	0.118238	0.342823	0.929353	-2.53879	-1.27117	0.320771	1.61413	1.33504	NA	NA	NA	NA	NA	NA	NA
chr1_11043600_11044200	0.971135	0.028647	0.00350081	-0.00793564	-2.74643	-3.15313	0.218875	1.24077	1.05966	NA	NA	NA	NA	NA	NA	NA
chr1_110436600_110437200	0.831984	0.102518	0.00143737	-0.0523725	-2.43786	-4.0031	0.246349	1.48232	1.22856	NA	NA	NA	NA	NA	NA	NA
chr1_110440800_110441400	0.895151	0.129304	0.0133312	0.0337106	-2.10227	-2.94882	0.25528	1.37695	1.17486	NA	NA	NA	NA	NA	NA	NA
chr1_110441400_110442000	0.0413922	0.174471	0.0109915	-0.524725	-1.89693	-3.05737	0.254662	1.38907	1.18465	NA	NA	NA	NA	NA	NA	NA
chr1_11044200_11044800	0.663598	0.198503	0.00160915	0.0931387	-1.44717	-3.08665	0.213636	1.1196	0.957544	NA	NA	NA	NA	NA	NA	NA
chr1_110443800_110444400	0.447982	0.0500718	0.274232	0.209707	-2.74189	-1.29972	0.275516	1.38608	1.1836	NA	NA	NA	NA	NA	NA	NA
chr1_110447400_110448000	0.82254	0.0081611	0.0119474	-0.0488503	-3.38839	-2.74654	0.217361	1.26077	1.07692	NA	NA	NA	NA	NA	NA	NA
chr1_11044800_11045400	0.138446	0.104893	0.0607164	0.231847	-1.28547	-1.28384	0.1555	0.787068	0.678431	NA	NA	NA	NA	NA	NA	NA
chr1_110448000_110448600	0.0948623	0.000667563	0.0950932	0.371815	-4.44839	-1.83054	0.220947	1.27511	1.08854	NA	NA	NA	NA	NA	NA	NA
chr1_110452200_110452800	0.014973	0.00177149	0.346902	-0.620024	-4.4093	-1.11106	0.251371	1.38067	1.17683	NA	NA	NA	NA	NA	NA	NA
chr1_110452800_110453400	0.622673	0.00518582	0.0637937	0.118022	-3.8163	-2.14093	0.239264	1.34165	1.14493	NA	NA	NA	NA	NA	NA	NA
chr1_110453400_110454000	0.902963	0.0243121	0.000536951	0.0241644	-2.80145	-3.72884	0.197805	1.22905	1.04977	NA	NA	NA	NA	NA	NA	NA
chr1_11045400_11046000	0.783315	0.000144537	0.146972	0.0482288	-3.99056	-1.25713	0.175006	1.0183	0.861509	NA	NA	NA	NA	NA	NA	NA
chr1_110454000_110454600	0.888635	0.0974518	0.000278418	-0.0278834	-1.91471	-3.6679	0.198723	1.14678	0.981053	NA	NA	NA	NA	NA	NA	NA
chr1_110454600_110455200	0.831571	0.0087087	0.119534	-0.0532531	-3.64446	-1.82848	0.249869	1.36777	1.16665	NA	NA	NA	NA	NA	NA	NA
chr1_110455200_110455800	0.991492	0.0157555	0.135309	-0.00270353	-3.29297	-1.72593	0.253039	1.34551	1.14829	NA	NA	NA	NA	NA	NA	NA
chr1_110455800_110456400	0.523618	0.06575	7.73235e-05	0.1438	-2.75583	-5.01679	0.224847	1.48472	1.22793	NA	NA	NA	NA	NA	NA	NA
chr1_110458200_110458800	0.0540214	0.0176708	0.10935	0.510471	-3.56589	-1.97866	0.262496	1.48347	1.22714	NA	NA	NA	NA	NA	NA	NA
chr1_110458800_110459400	0.400388	0.00499261	0.266986	0.220635	-4.17666	-1.37971	0.26149	1.46173	1.2375	NA	NA	NA	NA	NA	NA	NA
chr1_11046000_11046600	0.984313	0.111139	0.333618	-0.00426872	-1.58752	-0.813368	0.216675	0.989569	0.838053	NA	NA	NA	NA	NA	NA	NA
chr1_110464200_110464800	0.310829	0.931232	0.0209818	0.320477	0.0916584	2.10728	0.314953	1.06006	0.901557	0.314573	0.0513949	-2.01562	1.39159	-1.44843	0.162994	0.0124321
chr1_11046600_11047200	0.797402	0.899233	0.363524	0.0424676	0.0735734	0.461324	0.165083	0.579848	0.505869	0.306111	0.310213	-0.38775	0.769498	-0.503901	0.619837	0.0419745
chr1_11047200_11047800	0.863944	0.474408	0.156419	0.0325973	0.445976	0.772452	0.189847	0.621605	0.541823	0.172589	0.166768	-0.326476	0.8246	-0.395921	0.696355	0.0469925
chr1_110472600_110473200	0.757654	0.00601495	0.00543493	-0.0658378	-3.66467	-3.16519	0.21291	1.31169	1.11902	NA	NA	NA	NA	NA	NA	NA
chr1_110476800_110477400	0.952993	0.00826163	2.80805e-16	-0.0198428	1.67386	5.22442	0.335947	0.623827	0.555277	0.0151502	0.00381897	-3.55056	0.83516	-4.25135	0.000390868	0.000162094
chr1_110477400_110478000	0.859304	0.000135526	9.50461e-14	-0.0536088	2.27937	4.30145	0.301817	0.579075	0.514636	0.00403537	0.00397917	-2.02207	0.774712	-2.6101	0.0167567	0.0020807
chr1_110478600_110479200	0.810662	0.0747532	0.0159986	-0.0433615	-1.76198	-2.02421	0.18062	0.98066	0.829056	NA	NA	NA	NA	NA	NA	NA
chr1_110479200_110479800	0.506792	0.0302272	0.00945891	0.122227	-2.28345	-2.32365	0.1836	1.04189	0.881829	NA	NA	NA	NA	NA	NA	NA
chr1_110479800_110480400	0.547177	0.000884859	0.0940608	-0.138957	-4.52294	-1.91112	0.23021	1.3282	1.13287	NA	NA	NA	NA	NA	NA	NA
chr1_110480400_110481000	0.792028	0.00212216	0.146576	-0.0650763	-4.38267	-1.73669	0.246283	1.39715	1.18898	NA	NA	NA	NA	NA	NA	NA
chr1_110481600_110482200	0.0321627	0.00319899	0.208279	0.548221	-4.1384	-1.48685	0.253082	1.37712	1.17562	NA	NA	NA	NA	NA	NA	NA
chr1_110482200_110482800	0.131523	0.00677858	0.505154	0.379958	-3.31626	-0.689011	0.250319	1.20479	1.03099	NA	NA	NA	NA	NA	NA	NA
chr1_110482800_110483400	0.497565	0.0231255	0.00234837	-0.126523	-2.4399	-2.80065	0.185987	1.0612	0.902063	NA	NA	NA	NA	NA	NA	NA
chr1_110483400_110484000	0.392533	0.000163259	0.00677286	-0.147339	-4.32656	-2.62122	0.171734	1.11342	0.952183	NA	NA	NA	NA	NA	NA	NA
chr1_110484600_110485200	0.111414	0.0247892	0.0189647	0.409036	-3.41528	-2.99412	0.255167	1.50345	1.25983	NA	NA	NA	NA	NA	NA	NA
chr1_110485200_110485800	0.149373	0.0129896	0.0196806	0.34453	-3.43195	-2.74414	0.23752	1.36213	1.16165	NA	NA	NA	NA	NA	NA	NA
chr1_110486400_110487000	0.984148	0.00273096	0.0207803	0.00451492	-4.31432	-2.7975	0.226795	1.41158	1.19493	NA	NA	NA	NA	NA	NA	NA
chr1_110487000_110487600	0.725281	0.0016508	0.0633496	-0.0782847	-4.10996	-2.04347	0.222281	1.27814	1.09095	NA	NA	NA	NA	NA	NA	NA
chr1_110489400_110490000	0.499606	0.00331973	0.0181566	-0.108517	-2.92251	-1.97473	0.16028	0.976447	0.82509	NA	NA	NA	NA	NA	NA	NA
chr1_110490000_110490600	0.525349	0.000744016	0.0173398	0.099048	-3.44121	-2.02732	0.155521	0.99551	0.840868	NA	NA	NA	NA	NA	NA	NA
chr1_110490600_110491200	0.184568	0.0013078	0.00388634	0.260837	-4.23768	-3.23447	0.195521	1.28909	1.09973	NA	NA	NA	NA	NA	NA	NA
chr1_110491800_110492400	0.998242	0.00204686	0.352528	0.000522093	-3.79497	-0.962633	0.236479	1.20541	1.03163	NA	NA	NA	NA	NA	NA	NA
chr1_110492400_110493000	0.536539	0.0157569	0.520943	-0.148808	-2.71019	-0.608881	0.240115	1.1074	0.945939	NA	NA	NA	NA	NA	NA	NA
chr1_110493600_110494200	0.419786	0.0707834	0.0728895	0.203855	-2.31036	-1.95998	0.251854	1.26794	1.08375	NA	NA	NA	NA	NA	NA	NA
chr1_110494200_110494800	0.351239	0.00287907	0.0166248	0.213831	-4.25186	-2.8944	0.228543	1.39895	1.19257	NA	NA	NA	NA	NA	NA	NA
chr1_110496000_110496600	0.689496	0.36004	0.045769	-0.10914	-1.25111	-2.34606	0.272542	1.36196	1.16297	NA	NA	NA	NA	NA	NA	NA
chr1_110496600_110497200	0.972529	0.0855132	0.00600087	0.00874009	-2.57969	-3.49898	0.2533	1.48854	1.25202	NA	NA	NA	NA	NA	NA	NA
chr1_110497200_110497800	0.595014	0.0039848	0.169998	-0.129531	-3.84897	-1.54556	0.243056	1.31236	1.11995	NA	NA	NA	NA	NA	NA	NA
chr1_110497800_110498400	0.925821	0.260306	0.01581	0.0244109	-1.03903	1.92573	0.261671	0.918915	0.787276	0.10113	0.0447181	-2.96476	1.21004	-2.45012	0.0236112	0.00269397
chr1_110498400_110499000	0.760556	0.930132	0.0104234	-0.078299	-0.102102	-2.58904	0.256377	1.16219	0.995756	NA	NA	NA	NA	NA	NA	NA
chr1_110503800_110504400	0.721684	0.200378	0.00457437	0.087977	-1.73255	-3.31481	0.246435	1.34603	1.14826	NA	NA	NA	NA	NA	NA	NA
chr1_110504400_110505000	0.748217	0.105758	0.00694061	0.0781644	-2.19131	-3.14855	0.242982	1.34507	1.14728	NA	NA	NA	NA	NA	NA	NA
chr1_110505000_110505600	0.399611	0.116241	0.0132609	-0.228796	-2.3912	-3.13924	0.270714	1.51195	1.24975	NA	NA	NA	NA	NA	NA	NA
chr1_110506200_110506800	0.726963	0.00240797	0.272758	-0.0842735	-3.86663	-1.17564	0.240824	1.24862	1.06731	NA	NA	NA	NA	NA	NA	NA
chr1_110506800_110507400	0.484001	0.00030127	0.491156	-0.166924	-4.68146	-0.742834	0.237804	1.25959	1.07584	NA	NA	NA	NA	NA	NA	NA
chr1_110507400_110508000	0.735651	0.806625	0.14738	-0.0784583	-0.198588	1.01827	0.231879	0.809593	0.698528	0.280009	0.160145	-1.21685	1.06929	-1.138	0.268569	0.0191742
chr1_110508000_110508600	0.215781	0.893283	0.25472	-0.204706	-0.092491	-0.683408	0.164552	0.688078	0.597318	NA	NA	NA	NA	NA	NA	NA
chr1_110508600_110509200	0.435706	0.00706664	0.0843252	-0.193903	-3.8478	-2.08413	0.247978	1.40529	1.19796	NA	NA	NA	NA	NA	NA	NA
chr1_110510400_110511000	0.487126	0.742111	0.0143848	0.177493	-0.39552	-2.54788	0.254683	1.19935	1.02671	NA	NA	NA	NA	NA	NA	NA
chr1_110513400_110514000	0.00972688	0.226603	0.0183021	0.649672	-1.49703	-2.51941	0.247493	1.23208	1.05402	NA	NA	NA	NA	NA	NA	NA
chr1_110514000_110514600	0.307743	0.227451	0.00151893	0.252125	-1.65636	-3.77683	0.246197	1.36572	1.1652	NA	NA	NA	NA	NA	NA	NA
chr1_110515200_110515800	0.512479	0.518633	0.000935026	0.161224	-0.843033	-3.76812	0.245459	1.30247	1.11192	NA	NA	NA	NA	NA	NA	NA
chr1_110515800_110516400	0.566733	0.0363356	0.283857	-0.103506	-1.90375	-0.825593	0.180209	0.899891	0.767106	NA	NA	NA	NA	NA	NA	NA
chr1_110517000_110517600	0.329159	0.0458585	0.14492	-0.268909	-2.89689	-1.79926	0.274517	1.43662	1.22672	NA	NA	NA	NA	NA	NA	NA
chr1_110517600_110518200	0.445342	0.231396	0.00079813	0.142283	-1.24128	-3.00063	0.185849	1.03223	0.873299	NA	NA	NA	NA	NA	NA	NA
chr1_110518200_110518800	0.250622	0.0618375	0.000287282	0.22013	-2.10018	-3.55711	0.190736	1.1147	0.953655	NA	NA	NA	NA	NA	NA	NA
chr1_11052000_11052600	0.349038	0.145054	0.0744749	0.247169	-1.88017	-1.97275	0.262966	1.28231	1.09691	NA	NA	NA	NA	NA	NA	NA
chr1_110520000_110520600	0.659786	0.176163	0.001486	0.109005	-1.92887	-3.91824	0.247039	1.41805	1.20631	NA	NA	NA	NA	NA	NA	NA
chr1_110523000_110523600	0.494471	0.0271442	0.546859	-0.181575	-2.83497	-0.65499	0.265	1.26829	1.08426	NA	NA	NA	NA	NA	NA	NA
chr1_110523600_110524200	0.527039	0.532173	0.0330924	0.161243	-0.727155	-2.14301	0.254215	1.16084	0.994703	NA	NA	NA	NA	NA	NA	NA
chr1_110524200_110524800	0.587209	0.353565	0.00539573	0.103244	-0.91113	-2.34287	0.189692	0.97855	0.827576	NA	NA	NA	NA	NA	NA	NA
chr1_110524800_110525400	0.907962	0.0332655	0.255156	-0.0209026	-1.57286	0.724553	0.180444	0.730793	0.633864	0.0272446	0.237711	-2.29741	0.96739	-2.37486	0.0276727	0.00303747
chr1_110525400_110526000	0.803337	0.166617	0.112225	0.0538117	-1.10663	1.09989	0.215634	0.795496	0.687711	0.0709162	0.133484	-2.20652	1.05155	-2.09835	0.0487783	0.00469265
chr1_11052600_11053200	0.234965	0.00168641	0.0182391	0.241921	-3.86604	-2.46295	0.202729	1.20477	1.02983	NA	NA	NA	NA	NA	NA	NA
chr1_110527800_110528400	0.302955	0.117049	0.00294259	-0.249018	-2.14013	-3.50641	0.240758	1.35623	1.15637	NA	NA	NA	NA	NA	NA	NA
chr1_110528400_110529000	0.210038	0.0579019	0.0159268	-0.309449	-2.55077	-2.77979	0.245627	1.33288	1.13773	NA	NA	NA	NA	NA	NA	NA
chr1_110529600_110530200	0.323571	0.144226	0.00763515	-0.24501	-1.93609	-3.05105	0.247236	1.31771	1.12543	NA	NA	NA	NA	NA	NA	NA
chr1_110530200_110530800	0.814752	0.0198333	0.000896688	-0.0507774	-3.22413	-3.95476	0.21627	1.36658	1.1627	NA	NA	NA	NA	NA	NA	NA
chr1_11053200_11053800	0.574043	0.00294497	0.155144	0.0866185	-2.61464	-1.05545	0.153698	0.862349	0.73803	NA	NA	NA	NA	NA	NA	NA
chr1_110535000_110535600	0.425876	0.0424434	3.20557e-05	-0.153171	-2.63412	-4.72776	0.191743	1.28508	1.09622	NA	NA	NA	NA	NA	NA	NA
chr1_110535600_110536200	0.301083	0.0602842	3.39564e-05	-0.199826	-2.39893	-4.6431	0.192448	1.26553	1.08025	NA	NA	NA	NA	NA	NA	NA
chr1_110537400_110538000	0.620356	0.00241841	0.108968	-0.112566	-3.75012	-1.67168	0.22669	1.21153	1.03562	NA	NA	NA	NA	NA	NA	NA
chr1_11053800_11054400	0.538353	0.298239	0.0192785	-0.0938606	-0.797272	-1.56458	0.15213	0.76331	0.660088	NA	NA	NA	NA	NA	NA	NA
chr1_110538000_110538600	0.853095	0.0309114	0.00110184	-0.0395802	-2.81697	-3.67827	0.213315	1.29072	1.10146	NA	NA	NA	NA	NA	NA	NA
chr1_11054400_11055000	0.123553	0.426303	6.42313e-05	0.301312	-0.835575	-3.69301	0.194357	1.04696	0.8933	NA	NA	NA	NA	NA	NA	NA
chr1_110549400_110550000	0.0851416	0.603901	0.29163	0.535026	-0.717082	-1.24729	0.30835	1.37875	1.17786	NA	NA	NA	NA	NA	NA	NA
chr1_11055000_11055600	0.676079	0.0426238	0.254249	0.0988318	-2.24033	-1.07056	0.235996	1.09394	0.93477	NA	NA	NA	NA	NA	NA	NA
chr1_110554800_110555400	0.485729	2.1937e-05	0.308754	-0.139885	-5.03169	-0.997934	0.200075	1.14143	0.976518	NA	NA	NA	NA	NA	NA	NA
chr1_110555400_110556000	0.55038	0.35582	0.0316804	0.0878221	-0.654449	-1.32898	0.146667	0.706187	0.611756	NA	NA	NA	NA	NA	NA	NA
chr1_11055600_11056200	0.894613	0.00748061	0.0124334	0.0281531	-3.32147	-2.64751	0.212101	1.22194	1.04409	NA	NA	NA	NA	NA	NA	NA
chr1_110556000_110556600	0.864876	0.322207	0.00260909	0.0390329	-1.14184	-3.02098	0.228911	1.14896	0.983697	NA	NA	NA	NA	NA	NA	NA
chr1_110556600_110557200	0.145849	0.196107	0.00785603	0.355801	-1.64306	-2.91743	0.243147	1.26433	1.08014	NA	NA	NA	NA	NA	NA	NA
chr1_110559000_110559600	0.565653	0.00535916	0.445409	0.146979	-3.10261	0.718031	0.255185	1.09504	0.938024	0.0128572	0.361238	-3.82064	1.44188	-2.64977	0.0153741	0.00194945
chr1_110560800_110561400	0.987078	0.00112091	0.0818485	-0.00393242	-4.86745	-2.15829	0.242323	1.45983	1.23053	NA	NA	NA	NA	NA	NA	NA
chr1_110564400_110565000	0.650863	0.0170357	0.0688596	0.122988	-3.8353	-2.40828	0.271116	1.58632	1.3125	NA	NA	NA	NA	NA	NA	NA
chr1_110565000_110565600	0.583183	0.0106139	0.0609667	0.145452	-4.13615	-2.49481	0.264388	1.5948	1.31966	NA	NA	NA	NA	NA	NA	NA
chr1_11057400_11058000	0.486229	0.0817303	0.0859974	0.183947	-2.37613	-2.00094	0.2634	1.3542	1.15639	NA	NA	NA	NA	NA	NA	NA
chr1_11058000_11058600	0.506839	0.246216	0.00573479	0.133609	-1.18881	-2.42621	0.200719	1.02047	0.863355	NA	NA	NA	NA	NA	NA	NA
chr1_110581800_110582400	0.177318	0.00297608	0.0945543	0.327238	-4.24641	-2.00132	0.241223	1.40211	1.18814	NA	NA	NA	NA	NA	NA	NA
chr1_110582400_110583000	0.703663	0.0111987	0.111828	0.0945509	-3.50032	-1.85712	0.24801	1.35986	1.15988	NA	NA	NA	NA	NA	NA	NA
chr1_110583600_110584200	0.187789	0.0265324	0.117326	-0.332709	-2.93898	-1.76394	0.25124	1.30945	1.11868	NA	NA	NA	NA	NA	NA	NA
chr1_110584800_110585400	0.284675	0.0153924	0.0188997	0.246407	-3.09393	-2.55811	0.229342	1.25966	1.07577	NA	NA	NA	NA	NA	NA	NA
chr1_110585400_110586000	0.893628	0.0313311	0.039362	0.0327566	-2.82089	-2.30369	0.244483	1.2958	1.10656	NA	NA	NA	NA	NA	NA	NA
chr1_11058600_11059200	0.472327	0.213846	0.00727746	0.111946	-1.03941	-1.95092	0.155297	0.831987	0.715192	NA	NA	NA	NA	NA	NA	NA
chr1_110587800_110588400	0.226364	0.151777	0.0151031	0.316016	-2.04876	-2.98485	0.259953	1.42083	1.21172	NA	NA	NA	NA	NA	NA	NA
chr1_11059200_11059800	0.136202	0.0181782	0.113463	0.233748	-1.98646	-1.13642	0.155876	0.830148	0.713027	NA	NA	NA	NA	NA	NA	NA
chr1_110594400_110595000	0.64825	0.633556	0.243407	-0.127573	-0.585727	-1.23013	0.278982	1.22568	1.04964	NA	NA	NA	NA	NA	NA	NA
chr1_110595000_110595600	0.668316	0.206553	0.0609656	0.111435	-1.60291	-2.0409	0.259477	1.26255	1.07955	NA	NA	NA	NA	NA	NA	NA
chr1_11059800_11060400	0.335194	0.463935	0.0584296	0.248978	-0.858599	-1.91234	0.257375	1.1688	1.0014	NA	NA	NA	NA	NA	NA	NA
chr1_110601000_110601600	0.563927	0.000286474	0.10147	0.117888	-4.32597	-1.63606	0.20377	1.15954	0.991725	NA	NA	NA	NA	NA	NA	NA
chr1_110602200_110602800	0.221186	0.165773	6.19384e-05	0.281667	-2.00952	-5.01118	0.229106	1.44163	1.20938	NA	NA	NA	NA	NA	NA	NA
chr1_110602800_110603400	0.827344	0.0454474	0.00572264	0.0472476	-2.39793	-2.8534	0.216178	1.18688	1.01511	NA	NA	NA	NA	NA	NA	NA
chr1_110603400_110604000	0.496332	0.00914995	0.00674227	0.127331	-2.84782	-2.52684	0.186639	1.0759	0.917373	NA	NA	NA	NA	NA	NA	NA
chr1_110604000_110604600	0.421415	0.0131856	0.0118375	0.159752	-2.74664	-2.38297	0.198062	1.09254	0.933126	NA	NA	NA	NA	NA	NA	NA
chr1_110604600_110605200	0.657213	0.00972175	0.100218	-0.102291	-3.08039	-1.66233	0.229966	1.17339	1.00391	NA	NA	NA	NA	NA	NA	NA
chr1_110605800_110606400	0.962969	0.00135269	0.0150968	0.00949205	-4.04144	-2.59375	0.204046	1.23327	1.05289	NA	NA	NA	NA	NA	NA	NA
chr1_110606400_110607000	0.976759	0.00172267	0.189436	-0.00459653	-2.87686	-1.00918	0.157468	0.898369	0.764933	NA	NA	NA	NA	NA	NA	NA
chr1_110607000_110607600	0.93732	0.00163531	0.0728947	0.0167774	-3.80997	-1.83092	0.212926	1.18377	1.01241	NA	NA	NA	NA	NA	NA	NA
chr1_110607600_110608200	0.780819	0.326927	0.0663948	-0.0396987	-0.653063	-1.0661	0.14237	0.663603	0.575752	NA	NA	NA	NA	NA	NA	NA
chr1_110608200_110608800	0.605417	0.16731	0.0250189	-0.0891493	-1.2517	-1.74268	0.172131	0.901257	0.768394	NA	NA	NA	NA	NA	NA	NA
chr1_110610000_110610600	0.676346	0.56305	0.0114105	-0.120484	-0.891554	-3.29863	0.287949	1.53759	1.28492	NA	NA	NA	NA	NA	NA	NA
chr1_110610600_110611200	0.505689	0.859492	0.00585181	0.16746	-0.210814	-2.85126	0.250891	1.18849	1.01711	NA	NA	NA	NA	NA	NA	NA
chr1_110611200_110611800	0.563591	0.245905	0.00951497	0.150872	-1.68045	-3.19652	0.260558	1.44154	1.21406	NA	NA	NA	NA	NA	NA	NA
chr1_110611800_110612400	0.00546565	0.0381411	0.246215	0.793812	-3.10561	-1.4641	0.280834	1.48228	1.25678	NA	NA	NA	NA	NA	NA	NA
chr1_110612400_110613000	0.826201	0.00966083	0.920753	-0.0587679	-3.24989	-0.105592	0.267091	1.23689	1.05929	NA	NA	NA	NA	NA	NA	NA
chr1_110613000_110613600	0.900508	0.104239	0.00491107	0.0297366	-2.14116	-3.19867	0.23738	1.3085	1.11728	NA	NA	NA	NA	NA	NA	NA
chr1_110613600_110614200	0.520718	0.104917	0.0086293	-0.155757	-2.14694	-2.99418	0.241848	1.31462	1.12235	NA	NA	NA	NA	NA	NA	NA
chr1_110616600_110617200	0.138095	0.200406	0.493992	-0.422477	-1.64934	-0.752272	0.283103	1.28146	1.09668	NA	NA	NA	NA	NA	NA	NA
chr1_110618400_110619000	0.112876	0.030896	0.0183994	-0.388431	-2.99106	-2.79204	0.243313	1.37036	1.16907	NA	NA	NA	NA	NA	NA	NA
chr1_110619000_110619600	0.728345	0.00518988	0.116999	-0.0613927	-2.76009	-1.29484	0.176368	0.970418	0.820442	NA	NA	NA	NA	NA	NA	NA
chr1_110619600_110620200	0.406466	6.6129e-05	0.544007	-0.144056	-3.93876	-0.490839	0.172958	0.954498	0.806769	NA	NA	NA	NA	NA	NA	NA
chr1_110630400_110631000	0.990327	0.614458	0.0611351	0.00252231	-0.485666	-1.54052	0.207635	0.961782	0.815412	NA	NA	NA	NA	NA	NA	NA
chr1_110631000_110631600	0.74343	0.711405	0.0234267	-0.0635366	-0.346622	-1.82496	0.193692	0.934801	0.795513	NA	NA	NA	NA	NA	NA	NA
chr1_110631600_110632200	0.993295	0.351836	0.00182818	-0.00216159	-1.36022	-3.87074	0.256709	1.45561	1.21578	NA	NA	NA	NA	NA	NA	NA
chr1_110637000_110637600	0.623208	0.236228	0.00632229	-0.135964	-1.87612	-3.61784	0.276062	1.57645	1.30293	NA	NA	NA	NA	NA	NA	NA
chr1_110637600_110638200	0.729942	0.128005	0.000229095	-0.0824597	-2.29097	-4.73803	0.238348	1.4954	1.24918	NA	NA	NA	NA	NA	NA	NA
chr1_1106400_1107000	0.181877	0.00285438	0.0859066	0.278726	-3.37	-1.64032	0.207642	1.10778	0.947706	NA	NA	NA	NA	NA	NA	NA
chr1_11066400_11067000	0.33044	0.0456627	0.080274	-0.242974	-2.59603	-1.93743	0.248703	1.28624	1.09883	NA	NA	NA	NA	NA	NA	NA
chr1_11067000_11067600	0.219812	0.253933	0.157494	0.33788	-1.50235	-1.59364	0.274007	1.31091	1.12075	NA	NA	NA	NA	NA	NA	NA
chr1_110673000_110673600	0.966208	0.0184002	0.352324	0.00798773	-2.24614	-0.744319	0.188178	0.9405	0.797331	NA	NA	NA	NA	NA	NA	NA
chr1_110673600_110674200	0.694995	0.0155346	0.596466	0.0623713	-1.69286	0.318115	0.158715	0.690203	0.599284	0.0195461	0.445744	-2.01098	0.914069	-2.20003	0.0397262	0.00400687
chr1_110674200_110674800	0.929621	0.0178197	0.715869	0.0118708	-1.39086	0.184227	0.134139	0.579393	0.505013	0.0206975	0.502864	-1.57508	0.768592	-2.04931	0.0537786	0.00506133
chr1_110674800_110675400	0.347909	0.0107151	0.780556	-0.144667	-1.88761	-0.176419	0.153552	0.728787	0.631906	NA	NA	NA	NA	NA	NA	NA
chr1_110675400_110676000	0.645871	0.0152758	0.584904	-0.118582	-3.07768	-0.585966	0.257451	1.25158	1.07	NA	NA	NA	NA	NA	NA	NA
chr1_110686800_110687400	0.300708	0.0468175	0.870485	-0.295561	-2.6749	-0.186015	0.284426	1.33246	1.13859	NA	NA	NA	NA	NA	NA	NA
chr1_11068800_11069400	0.00586246	0.00932544	0.122716	-0.724136	-3.88579	-1.92878	0.258374	1.47182	1.24132	NA	NA	NA	NA	NA	NA	NA
chr1_11069400_11070000	0.61535	0.0157584	0.384262	-0.128414	-3.08048	-0.939499	0.254946	1.25872	1.07607	NA	NA	NA	NA	NA	NA	NA
chr1_1107000_1107600	0.815277	0.000337278	0.126077	0.0423969	-3.71804	-1.31903	0.181099	1.00899	0.856589	NA	NA	NA	NA	NA	NA	NA
chr1_11070600_11071200	0.29838	0.00221603	0.0244752	-0.23435	-4.19724	-2.61072	0.224433	1.34391	1.14671	NA	NA	NA	NA	NA	NA	NA
chr1_11071200_11071800	0.403185	0.00268854	0.0141854	-0.187972	-4.30211	-2.95731	0.22411	1.40527	1.1892	NA	NA	NA	NA	NA	NA	NA
chr1_110712600_110713200	0.270355	0.0255636	0.06776	-0.28429	-3.1229	-2.17419	0.256795	1.38221	1.18015	NA	NA	NA	NA	NA	NA	NA
chr1_110719200_110719800	0.100608	0.0339107	0.463323	0.474609	-3.08104	-0.901655	0.286958	1.43684	1.22573	NA	NA	NA	NA	NA	NA	NA
chr1_110720400_110721000	0.685422	0.976785	0.000674425	-0.128702	0.0290489	2.9553	0.316997	0.996285	0.847854	0.326144	0.0136783	-2.92625	1.30822	-2.23682	0.0368481	0.00378658
chr1_110728800_110729400	0.55922	0.00722611	0.00552242	-0.149664	-2.64725	2.32794	0.255597	0.969584	0.824606	0.0144054	0.0278057	-4.97519	1.27282	-3.9088	0.000870682	0.000256535
chr1_110750400_110751000	0.699938	0.00154062	0.0678582	0.0930966	-4.65814	-2.252	0.241011	1.43904	1.22283	NA	NA	NA	NA	NA	NA	NA
chr1_1107600_1108200	0.0706253	0.0114103	0.00012171	-0.331382	-3.07133	-4.05142	0.181761	1.19637	1.02176	NA	NA	NA	NA	NA	NA	NA
chr1_11077200_11077800	0.336591	0.719402	0.00540092	-0.234702	-0.411	-2.76537	0.243323	1.14149	0.976929	NA	NA	NA	NA	NA	NA	NA
chr1_110778000_110778600	0.468872	0.0445866	0.0103251	0.184185	-3.01302	-3.22991	0.253526	1.48526	1.2406	NA	NA	NA	NA	NA	NA	NA
chr1_1108200_1108800	0.0172161	0.00266403	0.0468223	0.553175	-4.06202	-2.27119	0.22918	1.32557	1.13138	NA	NA	NA	NA	NA	NA	NA
chr1_110872800_110873400	0.193493	0.0740703	0.000412547	0.295038	-2.49936	-4.27569	0.225697	1.38775	1.1786	NA	NA	NA	NA	NA	NA	NA
chr1_1108800_1109400	0.0434877	0.00365221	0.0590156	0.5147	-4.52474	-2.43954	0.252385	1.52776	1.28048	NA	NA	NA	NA	NA	NA	NA
chr1_110880000_110880600	0.906806	0.868301	0.0179488	-0.033054	0.219316	-2.70519	0.281787	1.31996	1.12821	0.297723	0.0476298	2.9245	1.73642	1.68421	0.107684	0.00882862
chr1_110902800_110903400	0.275656	0.00492811	0.0122009	-0.238877	-3.70931	-2.81197	0.218184	1.29617	1.10592	NA	NA	NA	NA	NA	NA	NA
chr1_110903400_110904000	0.598814	0.000848344	0.00701819	0.108791	-4.58283	-3.13054	0.206267	1.34085	1.14233	NA	NA	NA	NA	NA	NA	NA
chr1_110904000_110904600	0.462002	0.0466719	0.382925	-0.200445	-2.63713	-0.982701	0.271684	1.31276	1.12238	NA	NA	NA	NA	NA	NA	NA
chr1_11091000_11091600	0.938299	0.478518	0.47514	0.0211423	0.742349	-0.634922	0.27259	1.0444	0.886432	0.173976	0.378748	1.37727	1.36987	1.0054	0.326713	0.0229136
chr1_11091600_11092200	0.488369	0.622029	0.0231254	-0.19952	-0.725113	-2.87804	0.287109	1.46729	1.25177	NA	NA	NA	NA	NA	NA	NA
chr1_110963400_110964000	0.870844	0.00140713	0.357228	0.0283014	-3.11051	-0.746596	0.173719	0.95271	0.80799	NA	NA	NA	NA	NA	NA	NA
chr1_110964000_110964600	0.664945	0.000329611	0.269631	-0.0993288	-3.75412	0.955643	0.22881	1.01699	0.861911	0.00512549	0.247826	-4.70976	1.3331	-3.53293	0.00208949	0.000461292
chr1_110977200_110977800	0.463892	0.0150988	0.260636	-0.201172	-3.703	-1.40583	0.273826	1.5032	1.24418	NA	NA	NA	NA	NA	NA	NA
chr1_110986800_110987400	0.0965882	0.287004	0.00245745	0.435812	-1.57969	-3.87693	0.260341	1.47744	1.25458	NA	NA	NA	NA	NA	NA	NA
chr1_11099400_11100000	0.845098	6.06045e-06	0.230641	-0.0391758	-4.52656	0.976805	0.200105	0.958506	0.810976	0.00211653	0.220502	-5.50336	1.25555	-4.38322	0.000287251	0.000138888
chr1_1110000_1110600	0.831881	0.00549967	0.00233366	0.0432587	-3.68166	-3.45539	0.203353	1.30347	1.11223	NA	NA	NA	NA	NA	NA	NA
chr1_11100000_11100600	0.87225	0.000875131	0.33802	-0.0387859	-4.42065	-1.06447	0.240718	1.29691	1.10685	NA	NA	NA	NA	NA	NA	NA
chr1_111007800_111008400	0.0215806	0.024671	0.70717	-0.761885	-3.88961	-0.540656	0.327499	1.71082	1.43599	NA	NA	NA	NA	NA	NA	NA
chr1_11101200_11101800	0.817387	0.0106619	0.0184016	0.0534032	-3.43682	-2.70146	0.230797	1.32599	1.13116	NA	NA	NA	NA	NA	NA	NA
chr1_1110600_1111200	0.911881	0.00292692	0.014401	-0.0251162	-4.20767	-2.93255	0.226503	1.38684	1.18192	NA	NA	NA	NA	NA	NA	NA
chr1_111078600_111079200	0.411523	0.362356	0.172445	-0.177786	0.637041	0.831939	0.215778	0.69685	0.606321	0.134868	0.178706	-0.194898	0.923702	-0.210996	0.835025	0.0561016
chr1_111079200_111079800	0.639375	0.97266	0.233935	-0.106919	0.0270104	0.814356	0.227633	0.786548	0.680918	0.325178	0.222781	-0.787346	1.04034	-0.756816	0.457984	0.0313969
chr1_111097200_111097800	0.00806803	0.0005147	0.0122974	-0.618567	-5.19781	-3.05931	0.229814	1.45831	1.20457	NA	NA	NA	NA	NA	NA	NA
chr1_111102000_111102600	0.517351	0.511824	0.351385	-0.175061	0.62079	0.755764	0.269638	0.943665	0.808009	0.1853	0.302131	-0.134974	1.24233	-0.108646	0.914566	0.061281
chr1_1111200_1111800	0.890962	0.0263004	0.17443	0.0248272	-2.07097	-1.06914	0.180742	0.921262	0.782824	NA	NA	NA	NA	NA	NA	NA
chr1_111136800_111137400	0.112075	0.302341	0.14782	-0.432699	-1.33687	-1.60653	0.270432	1.29088	1.10328	NA	NA	NA	NA	NA	NA	NA
chr1_11113800_11114400	0.559314	0.251211	0.00998784	-0.160041	-1.77184	-3.33866	0.273386	1.53717	1.2765	NA	NA	NA	NA	NA	NA	NA
chr1_111139200_111139800	0.771828	0.00228038	0.0826355	-0.068974	-4.24112	-2.03267	0.237347	1.36192	1.16193	NA	NA	NA	NA	NA	NA	NA
chr1_111139800_111140400	0.122083	0.125866	0.825774	-0.206582	-0.867679	-0.108335	0.132725	0.563158	0.491139	NA	NA	NA	NA	NA	NA	NA
chr1_111140400_111141000	0.441874	0.12876	0.00027854	0.142236	-1.59077	-3.30603	0.184376	1.04043	0.884292	NA	NA	NA	NA	NA	NA	NA
chr1_11114400_11115000	0.0117781	0.201224	0.0195351	-0.696936	-1.94743	-2.97736	0.27271	1.51584	1.25884	NA	NA	NA	NA	NA	NA	NA
chr1_1111800_1112400	0.986484	0.000144293	0.741458	-0.002383	-2.96396	-0.21621	0.140391	0.756246	0.653907	NA	NA	NA	NA	NA	NA	NA
chr1_111190800_111191400	0.936887	0.126649	0.99902	0.0248437	-2.14934	0.00147025	0.313129	1.39792	1.1943	0.0581783	0.593356	-2.15081	1.83862	-1.1698	0.255835	0.0183686
chr1_111194400_111195000	0.961136	0.206234	0.0123255	-0.0117897	-1.51688	-2.59455	0.241472	1.19394	1.02191	NA	NA	NA	NA	NA	NA	NA
chr1_111195000_111195600	0.756641	0.492462	0.0402883	-0.0866522	-0.955394	-2.45489	0.279017	1.38787	1.1848	NA	NA	NA	NA	NA	NA	NA
chr1_111196800_111197400	0.40954	0.407228	0.0222025	0.201474	-0.940745	-2.24405	0.243492	1.13133	0.969254	NA	NA	NA	NA	NA	NA	NA
chr1_111197400_111198000	0.889639	0.240066	0.000865925	0.0319677	-1.47728	-3.64784	0.229918	1.25156	1.0692	NA	NA	NA	NA	NA	NA	NA
chr1_111198600_111199200	0.904026	0.00125392	0.186775	-0.0291499	-4.52732	-1.55246	0.241271	1.37183	1.1696	NA	NA	NA	NA	NA	NA	NA
chr1_111199200_111199800	0.608268	0.00820572	0.621379	-0.112087	-2.7389	-0.427507	0.218144	1.01984	0.863463	NA	NA	NA	NA	NA	NA	NA
chr1_111199800_111200400	0.869941	0.118061	0.0442368	0.0328625	-1.62532	-1.77462	0.200302	1.03286	0.873337	NA	NA	NA	NA	NA	NA	NA
chr1_111200400_111201000	0.678139	0.882272	0.115014	0.0747114	0.113449	-1.05209	0.179611	0.764545	0.662975	0.301403	0.135601	1.16554	1.01196	1.15176	0.263001	0.0188199
chr1_111202800_111203400	0.680836	0.296871	0.00543551	0.106349	-1.467	-3.379	0.25796	1.40052	1.19462	NA	NA	NA	NA	NA	NA	NA
chr1_111203400_111204000	0.557396	0.0179938	0.0350501	0.152991	-3.56245	-2.61727	0.26007	1.48633	1.22844	NA	NA	NA	NA	NA	NA	NA
chr1_111204000_111204600	0.0379225	0.00030202	0.291448	-0.473718	-4.60601	-1.12167	0.22584	1.23952	1.05883	NA	NA	NA	NA	NA	NA	NA
chr1_111204600_111205200	0.167345	0.000271421	0.0808015	-0.310908	-5.13907	-2.05757	0.223881	1.37194	1.16903	NA	NA	NA	NA	NA	NA	NA
chr1_111213600_111214200	0.933556	0.0525539	0.476571	-0.0239104	-2.8077	-0.873778	0.286223	1.43479	1.22388	NA	NA	NA	NA	NA	NA	NA
chr1_111214200_111214800	0.0175318	3.78308e-50	3.06057e-64	-0.677112	6.02928	7.68683	0.281336	0.24525	0.232744	0	0.000219137	-1.65755	0.338109	-4.90243	8.60421e-05	8.44903e-05
chr1_111216000_111216600	0.881027	0.0416999	0.261791	0.0374275	-2.42017	-1.13583	0.249568	1.17637	1.00768	NA	NA	NA	NA	NA	NA	NA
chr1_111227400_111228000	0.353814	0.0962917	9.43709e-05	0.203958	-2.31601	-4.7496	0.219164	1.38227	1.17769	NA	NA	NA	NA	NA	NA	NA
chr1_111228000_111228600	0.317943	9.99008e-08	3.76512e-19	-0.340003	3.29339	5.49402	0.339111	0.582845	0.519295	0.00107944	0.00365701	-2.20063	0.780625	-2.81906	0.0106002	0.00147976
chr1_111232800_111233400	0.444788	0.00609038	0.0120476	0.17733	-3.92207	-3.04296	0.231344	1.40598	1.19458	NA	NA	NA	NA	NA	NA	NA
chr1_111234600_111235200	0.242642	0.205824	0.878334	0.34365	-1.55566	0.160833	0.29275	1.22335	1.04853	0.0835656	0.562897	-1.71649	1.61121	-1.06534	0.299414	0.0211682
chr1_111235200_111235800	0.0580906	0.0160679	0.985384	0.551562	-3.36064	-0.0215953	0.288433	1.37734	1.17649	NA	NA	NA	NA	NA	NA	NA
chr1_111238200_111238800	0.806789	0.00771507	2.34995e-07	-0.0694062	1.86105	3.2932	0.283197	0.687405	0.602617	0.0147679	0.00598336	-1.43215	0.914152	-1.56665	0.132883	0.0104977
chr1_1112400_1113000	0.940852	0.000110597	0.00145876	0.011995	-4.76477	-3.3181	0.161341	1.19395	1.01975	NA	NA	NA	NA	NA	NA	NA
chr1_111246000_111246600	0.0479452	0.667558	0.00594081	-0.54804	-0.623155	-3.45015	0.274413	1.4475	1.23303	NA	NA	NA	NA	NA	NA	NA
chr1_111254400_111255000	0.127241	0.125334	0.524655	-0.457333	-2.17007	-0.766895	0.297915	1.40646	1.20213	NA	NA	NA	NA	NA	NA	NA
chr1_111266400_111267000	0.18219	0.0138078	0.358646	-0.379136	-3.80641	-1.17102	0.282648	1.52447	1.27108	NA	NA	NA	NA	NA	NA	NA
chr1_111267000_111267600	0.725474	0.0049275	0.171365	-0.0933401	-4.38342	-1.76402	0.265225	1.53171	1.28237	NA	NA	NA	NA	NA	NA	NA
chr1_111267600_111268200	0.652833	0.0527272	0.0253331	0.114914	-2.82518	-2.75973	0.254857	1.4448	1.21952	NA	NA	NA	NA	NA	NA	NA
chr1_111270600_111271200	0.803876	0.000874679	0.13658	-0.0408267	-2.42571	0.925012	0.16406	0.711611	0.617448	0.00696455	0.15198	-3.35072	0.942142	-3.55649	0.00197839	0.000444652
chr1_111271200_111271800	0.341744	0.0424376	0.0024563	-0.217683	-2.74641	-3.53134	0.228108	1.33983	1.14269	NA	NA	NA	NA	NA	NA	NA
chr1_111279600_111280200	0.563953	0.0437237	0.336901	-0.164357	-2.99435	-1.20868	0.284111	1.46996	1.25388	NA	NA	NA	NA	NA	NA	NA
chr1_111282600_111283200	0.586465	0.0258	0.341325	-0.142887	-2.84829	-1.03219	0.262008	1.26273	1.08069	NA	NA	NA	NA	NA	NA	NA
chr1_111283200_111283800	0.830923	0.36691	0.035404	-0.0588355	-1.22715	-2.46303	0.274987	1.35521	1.15832	NA	NA	NA	NA	NA	NA	NA
chr1_111295800_111296400	0.651848	0.143654	0.018186	0.112097	-1.88195	-2.6152	0.247856	1.27902	1.09297	NA	NA	NA	NA	NA	NA	NA
chr1_1113000_1113600	0.211081	0.000930132	0.00626486	-0.24203	-4.3061	-3.01337	0.192555	1.27008	1.08401	NA	NA	NA	NA	NA	NA	NA
chr1_11130000_11130600	0.247541	0.00208545	0.210059	0.273254	-3.86002	-1.32267	0.235223	1.22838	1.04993	NA	NA	NA	NA	NA	NA	NA
chr1_11130600_11131200	0.527763	0.00703283	0.440682	-0.151272	-3.09392	-0.748111	0.238914	1.12927	0.96722	NA	NA	NA	NA	NA	NA	NA
chr1_11131200_11131800	0.0170977	0.0782627	0.0373033	-0.623259	-2.51845	-2.54072	0.257934	1.41871	1.20728	NA	NA	NA	NA	NA	NA	NA
chr1_111330000_111330600	0.098863	0.341031	0.0339521	-0.499813	-1.50511	-2.79163	0.300628	1.57485	1.30219	NA	NA	NA	NA	NA	NA	NA
chr1_111332400_111333000	0.818261	0.0285716	0.0033931	-0.0519328	-2.89548	-3.331	0.225541	1.30747	1.11559	NA	NA	NA	NA	NA	NA	NA
chr1_111334800_111335400	0.579705	0.167634	0.0502221	0.116946	-1.04826	1.29538	0.210622	0.755353	0.655271	0.0712283	0.0822034	-2.34363	0.99997	-2.3437	0.0295367	0.00319301
chr1_111335400_111336000	0.649248	0.0167946	0.0320603	-0.0757429	-1.52683	1.19073	0.166144	0.630101	0.549358	0.0201645	0.0639906	-2.71756	0.835955	-3.25085	0.00400286	0.00072388
chr1_11134200_11134800	0.554863	0.362254	0.0295673	-0.156746	-1.22336	-2.5143	0.264749	1.33793	1.14253	NA	NA	NA	NA	NA	NA	NA
chr1_111346200_111346800	0.741048	0.0091305	0.39972	0.0647122	-2.57162	-0.694133	0.195395	0.971275	0.821498	NA	NA	NA	NA	NA	NA	NA
chr1_111346800_111347400	0.127749	0.114427	0.161804	0.332003	-1.63308	-1.22332	0.216564	1.0274	0.869323	NA	NA	NA	NA	NA	NA	NA
chr1_111361800_111362400	0.422417	0.0470746	0.951478	-0.228581	-2.6528	-0.0689451	0.284009	1.32302	1.13078	NA	NA	NA	NA	NA	NA	NA
chr1_111369000_111369600	0.285644	0.00501704	0.0473362	0.269575	-4.33469	-2.51508	0.251413	1.51791	1.25584	NA	NA	NA	NA	NA	NA	NA
chr1_111372600_111373200	0.44434	0.0295034	0.052299	-0.189556	-2.89389	-2.19877	0.247051	1.3145	1.12238	NA	NA	NA	NA	NA	NA	NA
chr1_111373200_111373800	0.173881	0.195756	0.0200629	0.367502	-1.92877	-2.889	0.26874	1.48301	1.22685	NA	NA	NA	NA	NA	NA	NA
chr1_111383400_111384000	0.647811	0.0470288	0.108551	-0.118502	-2.72084	-1.87025	0.258798	1.35666	1.15726	NA	NA	NA	NA	NA	NA	NA
chr1_111387000_111387600	0.237614	0.260178	0.00479468	-0.323081	-1.77071	-3.73657	0.272285	1.56559	1.30149	NA	NA	NA	NA	NA	NA	NA
chr1_111388800_111389400	0.128407	0.104582	0.673841	-0.420908	-2.04072	-0.450492	0.275035	1.24836	1.06787	NA	NA	NA	NA	NA	NA	NA
chr1_111389400_111390000	0.141584	0.475021	0.0153828	-0.404766	-1.02812	-2.97574	0.273655	1.435	1.21142	NA	NA	NA	NA	NA	NA	NA
chr1_11139000_11139600	0.319259	0.0416087	0.568671	-0.274656	-2.76319	-0.65534	0.274684	1.34249	1.14671	NA	NA	NA	NA	NA	NA	NA
chr1_111393600_111394200	0.559345	0.00357519	0.00229366	-0.110467	-3.5603	-3.19102	0.188718	1.19928	1.02532	NA	NA	NA	NA	NA	NA	NA
chr1_111394200_111394800	0.628997	0.00126196	0.0691374	-0.0940209	-3.53859	-1.67708	0.194133	1.07287	0.914924	NA	NA	NA	NA	NA	NA	NA
chr1_11139600_11140200	0.191458	0.00298169	0.0248487	0.296404	-4.07746	-2.60706	0.2257	1.34659	1.14814	NA	NA	NA	NA	NA	NA	NA
chr1_111403200_111403800	0.928909	0.0333897	0.599543	-0.0274568	-3.29599	-0.681103	0.307144	1.5325	1.29394	NA	NA	NA	NA	NA	NA	NA
chr1_111410400_111411000	0.00564402	0.239136	0.0441436	-0.835484	-1.82694	-2.59669	0.296727	1.54473	1.27733	NA	NA	NA	NA	NA	NA	NA
chr1_111414600_111415200	0.145627	0.778826	0.0552764	0.373657	-0.310747	-1.82822	0.255208	1.10411	0.945076	NA	NA	NA	NA	NA	NA	NA
chr1_111417600_111418200	0.152237	0.0353728	0.0735628	-0.498023	-2.85029	2.07046	0.345774	1.34021	1.14756	0.0280329	0.102536	-4.92075	1.76438	-2.78893	0.0113309	0.00155401
chr1_1114200_1114800	0.503342	0.0568512	0.000378396	-0.137464	-2.35746	-3.82602	0.204818	1.22661	1.04755	NA	NA	NA	NA	NA	NA	NA
chr1_111422400_111423000	0.694261	0.0498476	0.840808	0.103739	-2.19334	0.190742	0.263316	1.10767	0.947686	0.0332132	0.550793	-2.38408	1.45775	-1.63545	0.117596	0.00948158
chr1_111423000_111423600	0.942806	0.0114593	0.0569258	-0.0182192	-2.56211	1.62829	0.253447	0.998626	0.847474	0.0172788	0.0881717	-4.1904	1.30976	-3.19937	0.00450268	0.00079005
chr1_111426000_111426600	0.513829	0.00549166	0.333236	-0.175009	-4.21735	-1.22025	0.267303	1.49286	1.25629	NA	NA	NA	NA	NA	NA	NA
chr1_111441600_111442200	0.704201	0.528447	0.0210397	0.10681	-0.892974	-2.81805	0.280703	1.41268	1.2062	NA	NA	NA	NA	NA	NA	NA
chr1_111442200_111442800	0.165913	0.128317	0.121309	0.395486	-2.26811	-1.96926	0.283816	1.4817	1.26256	NA	NA	NA	NA	NA	NA	NA
chr1_111448200_111448800	0.171968	0.0234878	0.379869	0.342669	-2.62625	-0.863787	0.249459	1.14532	0.980234	NA	NA	NA	NA	NA	NA	NA
chr1_111448800_111449400	0.976681	0.0754126	0.0376765	-0.00644671	-1.94886	-1.94692	0.220117	1.08716	0.926966	NA	NA	NA	NA	NA	NA	NA
chr1_111449400_111450000	0.184776	0.0973796	0.0126678	-0.310763	-2.03363	-2.63378	0.233056	1.21774	1.04151	NA	NA	NA	NA	NA	NA	NA
chr1_111485400_111486000	0.841378	0.211676	0.00448719	-0.0546807	-1.97742	-3.76668	0.272666	1.57527	1.30188	NA	NA	NA	NA	NA	NA	NA
chr1_111486600_111487200	0.450385	0.0158182	0.0407803	0.196651	-3.74532	-2.61762	0.259739	1.53128	1.26649	NA	NA	NA	NA	NA	NA	NA
chr1_111488400_111489000	0.886577	0.00792803	0.312805	-0.0362572	-2.82914	0.906193	0.253683	1.04869	0.894232	0.0149247	0.276816	-3.73533	1.37819	-2.71032	0.0134703	0.00176153
chr1_111502800_111503400	0.958307	0.0253127	0.0448076	0.0132891	-3.22974	-2.45866	0.2537	1.42701	1.21327	NA	NA	NA	NA	NA	NA	NA
chr1_111507600_111508200	0.0706852	0.020012	0.252156	0.282405	-1.83699	-0.773551	0.154931	0.779775	0.672445	NA	NA	NA	NA	NA	NA	NA
chr1_111508200_111508800	0.0214181	0.0379465	0.0593436	0.427383	-2.06278	-1.58408	0.183479	0.983535	0.83255	NA	NA	NA	NA	NA	NA	NA
chr1_111508800_111509400	0.224099	0.0620266	0.00123618	0.268813	-2.40362	-3.60289	0.22004	1.27669	1.09028	NA	NA	NA	NA	NA	NA	NA
chr1_111509400_111510000	0.786784	0.0355102	0.00186984	0.0600064	-2.74871	-3.50787	0.221377	1.29343	1.10425	NA	NA	NA	NA	NA	NA	NA
chr1_111514800_111515400	0.693142	0.0110423	0.0116669	-0.0969394	-3.88858	-3.23128	0.24511	1.5077	1.26268	NA	NA	NA	NA	NA	NA	NA
chr1_111515400_111516000	0.168468	3.6167e-05	0.801141	-0.240066	-4.02598	-0.200666	0.173329	0.940185	0.795038	NA	NA	NA	NA	NA	NA	NA
chr1_111516000_111516600	0.165787	0.000457751	0.397678	-0.298619	-3.97136	-0.800795	0.214237	1.10376	0.943625	NA	NA	NA	NA	NA	NA	NA
chr1_111535200_111535800	0.750817	0.00954723	0.0388204	0.0865751	-2.8169	1.91319	0.272034	1.07037	0.916407	0.016046	0.0710413	-4.73009	1.40908	-3.35687	0.00313816	0.000612542
chr1_111535800_111536400	0.00595474	0.652265	0.000198007	0.782339	-0.407512	2.96243	0.279676	0.902202	0.772856	0.23184	0.0107731	-3.36995	1.18797	-2.83672	0.0101931	0.00143777
chr1_111559800_111560400	0.118525	0.285951	0.982356	0.513543	-1.47536	-0.0260662	0.326761	1.37685	1.17635	NA	NA	NA	NA	NA	NA	NA
chr1_111576600_111577200	0.335024	0.813843	0.0298425	0.268033	-0.301922	-2.40575	0.276976	1.27954	1.09508	NA	NA	NA	NA	NA	NA	NA
chr1_111592800_111593400	0.876985	0.0187871	0.987149	0.0420531	-3.00331	-0.0174209	0.271128	1.26177	1.07944	NA	NA	NA	NA	NA	NA	NA
chr1_111599400_111600000	0.696253	0.549922	0.667299	-0.112914	-0.66587	0.409093	0.288584	1.11075	0.949478	0.198068	0.480785	-1.07496	1.46126	-0.735641	0.470489	0.0321964
chr1_1116000_1116600	0.717134	0.00365794	0.0781367	-0.0782555	-3.36022	-1.72505	0.215521	1.13476	0.97135	NA	NA	NA	NA	NA	NA	NA
chr1_111600000_111600600	0.0870493	0.474188	0.93466	-0.485322	-0.79984	0.0783037	0.281429	1.11427	0.953229	0.172527	0.5781	-0.878143	1.46637	-0.598855	0.555993	0.0377678
chr1_11160600_11161200	0.807083	0.00109409	0.62838	0.0421202	-3.05836	-0.377886	0.17213	0.915242	0.77885	NA	NA	NA	NA	NA	NA	NA
chr1_111607200_111607800	0.18081	0.640323	0.0917106	0.417772	-0.697861	-2.13596	0.310462	1.48998	1.25697	NA	NA	NA	NA	NA	NA	NA
chr1_111607800_111608400	0.0967475	0.132742	0.0493121	-0.399575	-1.72552	-1.93879	0.23881	1.1404	0.976786	NA	NA	NA	NA	NA	NA	NA
chr1_111608400_111609000	0.133339	0.0337362	0.613061	-0.330142	-2.16641	-0.433404	0.218532	1.0093	0.854907	NA	NA	NA	NA	NA	NA	NA
chr1_11161200_11161800	0.449791	0.0475896	0.0782807	-0.161315	-2.15011	-1.61938	0.212787	1.07485	0.912298	NA	NA	NA	NA	NA	NA	NA
chr1_111618600_111619200	0.197109	0.0242919	0.00269467	0.285768	-2.99942	-3.4362	0.220394	1.31571	1.12269	NA	NA	NA	NA	NA	NA	NA
chr1_111619800_111620400	0.163142	0.00726123	0.0212822	-0.324216	-3.7066	-2.69984	0.231136	1.35842	1.15783	NA	NA	NA	NA	NA	NA	NA
chr1_111649200_111649800	0.370644	0.00117076	0.0628395	-0.21502	-4.80073	-2.26482	0.239323	1.44554	1.20676	NA	NA	NA	NA	NA	NA	NA
chr1_1116600_1117200	0.960212	0.00768354	0.0355007	-0.0103981	-2.98838	-2.00246	0.20802	1.10321	0.942227	NA	NA	NA	NA	NA	NA	NA
chr1_111679200_111679800	0.40702	0.000647934	0.104874	0.154661	-3.62337	-1.43706	0.185911	1.03603	0.879837	NA	NA	NA	NA	NA	NA	NA
chr1_111679800_111680400	0.943755	0.000408371	0.0162995	0.0143957	-4.74639	-2.7146	0.203643	1.3073	1.11504	NA	NA	NA	NA	NA	NA	NA
chr1_111718800_111719400	0.0252725	0.0652003	0.210141	0.620136	-2.61505	-1.5106	0.27392	1.40596	1.19932	NA	NA	NA	NA	NA	NA	NA
chr1_1117200_1117800	0.280608	0.145236	0.016448	0.226415	-1.51031	-2.12783	0.208954	1.03053	0.875262	NA	NA	NA	NA	NA	NA	NA
chr1_111720600_111721200	0.799736	0.00756764	0.802135	-0.0465954	-2.30824	0.183237	0.183288	0.850453	0.729711	0.0146497	0.537405	-2.49148	1.1206	-2.22334	0.0378799	0.00386828
chr1_111721200_111721800	0.340524	0.0139553	0.0320243	-0.170645	-2.47287	-1.81758	0.178365	0.99196	0.838382	NA	NA	NA	NA	NA	NA	NA
chr1_111721800_111722400	0.230475	0.0322098	0.830587	-0.223607	-1.83362	-0.155247	0.18558	0.846714	0.724137	NA	NA	NA	NA	NA	NA	NA
chr1_111722400_111723000	0.548029	0.111765	0.0111912	-0.157063	-2.36041	-3.20465	0.260761	1.47395	1.24488	NA	NA	NA	NA	NA	NA	NA
chr1_111723000_111723600	0.430214	0.021157	0.00215342	0.175891	-3.16465	-3.62	0.222267	1.35581	1.15573	NA	NA	NA	NA	NA	NA	NA
chr1_111726600_111727200	0.535323	0.758712	0.000156991	0.138536	-0.348263	-3.77133	0.222872	1.13133	0.967888	NA	NA	NA	NA	NA	NA	NA
chr1_111727200_111727800	0.0343366	0.0163813	0.00125979	0.441274	-3.14588	-3.64014	0.206287	1.2932	1.10348	NA	NA	NA	NA	NA	NA	NA
chr1_111729600_111730200	0.265755	0.00306072	0.163296	0.271437	-3.95897	-1.57071	0.242829	1.31114	1.12019	NA	NA	NA	NA	NA	NA	NA
chr1_111732000_111732600	0.764113	0.0572719	0.000368058	-0.0670361	-2.76078	-4.48718	0.222912	1.43893	1.22593	NA	NA	NA	NA	NA	NA	NA
chr1_111732600_111733200	0.911689	0.0469656	0.123296	-0.0277462	-1.95276	1.28062	0.249675	0.973402	0.82547	0.0321894	0.142129	-3.23338	1.27629	-2.53342	0.0197679	0.00235489
chr1_111733200_111733800	0.687585	1.47461e-15	8.35213e-35	0.0988397	3.09075	5.2748	0.245227	0.339192	0.308134	0.000118507	0.00159316	-2.18405	0.458255	-4.76601	0.000117927	9.66811e-05
chr1_111733800_111734400	0.183155	0.0207658	0.0150671	-0.282431	-1.83787	1.67472	0.211022	0.784938	0.679617	0.0220808	0.0436962	-3.51259	1.03827	-3.38311	0.00295417	0.000588127
chr1_111735600_111736200	0.582424	0.0384268	0.0273768	-0.143552	-3.1191	-2.8151	0.260407	1.49096	1.26134	NA	NA	NA	NA	NA	NA	NA
chr1_111736800_111737400	0.302287	0.193948	0.026351	-0.268504	-1.75934	-2.58462	0.259237	1.34723	1.15015	NA	NA	NA	NA	NA	NA	NA
chr1_111738000_111738600	0.794543	0.713785	0.00279662	-0.0531337	0.226043	1.6361	0.203606	0.614922	0.536654	0.25148	0.0212784	-1.41006	0.816165	-1.72766	0.0994601	0.00827599
chr1_111738600_111739200	0.633471	0.0155733	0.0421867	-0.0759778	-1.49307	1.08931	0.158949	0.608979	0.530757	0.0195674	0.0744318	-2.58238	0.807811	-3.19676	0.00452957	0.000793518
chr1_111739200_111739800	0.396734	0.234216	0.133173	-0.166212	-1.0935	-1.17346	0.195465	0.914874	0.776415	NA	NA	NA	NA	NA	NA	NA
chr1_111739800_111740400	0.461055	0.0136916	0.0917004	-0.134638	-2.41937	-1.39027	0.182102	0.967743	0.818124	NA	NA	NA	NA	NA	NA	NA
chr1_111740400_111741000	0.89209	0.000724955	0.0801359	0.0279073	-3.98972	-1.73837	0.205303	1.15164	0.985477	NA	NA	NA	NA	NA	NA	NA
chr1_111743400_111744000	0.368824	0.0125877	0.523309	0.230292	-3.13087	-0.677155	0.255346	1.23693	1.05802	NA	NA	NA	NA	NA	NA	NA
chr1_111744000_111744600	0.226203	0.0252972	0.639096	0.349918	-3.28073	-0.581339	0.28774	1.44938	1.23666	NA	NA	NA	NA	NA	NA	NA
chr1_111753000_111753600	0.256267	0.0137776	0.395485	0.311811	-3.60036	-1.04188	0.273424	1.44148	1.222	NA	NA	NA	NA	NA	NA	NA
chr1_111754800_111755400	0.481174	0.0060947	0.503142	-0.138622	-2.43834	0.501126	0.196211	0.87417	0.746316	0.0134772	0.394874	-2.93947	1.14942	-2.55736	0.0187772	0.00226445
chr1_111755400_111756000	0.101581	0.933607	0.454437	0.255229	-0.0461897	0.363087	0.154762	0.553351	0.483897	0.315248	0.366678	-0.409276	0.735088	-0.556772	0.58386	0.0395921
chr1_11175600_11176200	0.600226	0.0040534	0.0844234	0.12426	-3.87995	-1.96618	0.236509	1.32548	1.13052	NA	NA	NA	NA	NA	NA	NA
chr1_111756000_111756600	0.467212	0.000968708	0.909589	0.176549	-3.8927	-0.112291	0.242109	1.15229	0.986882	NA	NA	NA	NA	NA	NA	NA
chr1_111756600_111757200	0.203756	0.0294955	0.0932559	0.336789	-3.17818	-2.07612	0.263633	1.44356	1.22763	NA	NA	NA	NA	NA	NA	NA
chr1_11176200_11176800	0.958675	0.00380481	0.0216967	0.0118613	-4.12351	-2.74133	0.228461	1.39867	1.17944	NA	NA	NA	NA	NA	NA	NA
chr1_111777000_111777600	0.240898	0.277114	0.00333609	-0.315671	-1.68438	-3.85215	0.267916	1.54317	1.28774	NA	NA	NA	NA	NA	NA	NA
chr1_111778200_111778800	0.326279	0.112731	0.0258914	0.265206	-1.59659	1.91168	0.269125	0.999695	0.84803	0.0536966	0.0571618	-3.50827	1.31093	-2.67616	0.0145148	0.00186648
chr1_111778800_111779400	0.0791322	0.634601	0.00477565	0.583939	-0.521132	2.6684	0.329918	1.09387	0.929	0.226104	0.0262364	-3.18953	1.43513	-2.22247	0.0379473	0.00387347
chr1_1117800_1118400	0.743876	0.00335924	0.0278098	-0.056991	-3.03182	-1.90868	0.174052	1.01428	0.857642	NA	NA	NA	NA	NA	NA	NA
chr1_111780600_111781200	0.251156	0.00720792	0.00913442	-0.256582	-3.69249	-3.05346	0.222573	1.35198	1.15333	NA	NA	NA	NA	NA	NA	NA
chr1_11179200_11179800	0.462853	0.0116384	0.861509	0.202916	-3.32382	0.193818	0.275557	1.29839	1.10875	0.0173797	0.557701	-3.51764	1.70738	-2.06026	0.0526238	0.00498106
chr1_111792000_111792600	0.87598	0.00389968	0.0448266	-0.038509	-2.90944	1.69952	0.246249	0.9896	0.838732	0.0114644	0.0770108	-4.60896	1.29722	-3.55295	0.0019947	0.00044782
chr1_111794400_111795000	0.535228	0.048223	0.000809042	-0.116834	-2.18493	-3.20746	0.187915	1.09541	0.934589	NA	NA	NA	NA	NA	NA	NA
chr1_111796800_111797400	0.0688324	0.412207	0.00062724	0.467413	-1.20317	-4.29589	0.254711	1.46242	1.225	NA	NA	NA	NA	NA	NA	NA
chr1_11179800_11180400	0.275872	0.00939485	0.825025	0.31315	-3.6145	0.259404	0.286153	1.37044	1.1709	0.0159528	0.545495	-3.8739	1.80253	-2.14915	0.0440451	0.00433675
chr1_111801000_111801600	0.128528	0.0560257	0.000542809	-0.343091	-2.64928	-4.15528	0.224259	1.37377	1.17086	NA	NA	NA	NA	NA	NA	NA
chr1_111801600_111802200	0.73218	0.0757291	0.00023933	-0.0801712	-2.66009	-4.64604	0.233749	1.48554	1.22884	NA	NA	NA	NA	NA	NA	NA
chr1_111802800_111803400	0.374871	0.0345182	0.0502554	0.217096	-2.78195	-2.19707	0.243787	1.30184	1.11156	NA	NA	NA	NA	NA	NA	NA
chr1_111805800_111806400	0.309557	0.00177361	0.0668625	0.247003	-4.59454	-2.23833	0.242106	1.43884	1.21093	NA	NA	NA	NA	NA	NA	NA
chr1_111810600_111811200	0.601871	0.0441092	0.124809	0.146607	-3.13931	-2.00742	0.280308	1.54399	1.29922	NA	NA	NA	NA	NA	NA	NA
chr1_111811800_111812400	0.623201	0.0651097	0.001206	0.104457	-2.2345	-3.40008	0.212086	1.20095	1.02657	NA	NA	NA	NA	NA	NA	NA
chr1_111812400_111813000	0.948192	0.154152	0.00149365	-0.0159495	-2.02647	-3.9044	0.244979	1.41359	1.20263	NA	NA	NA	NA	NA	NA	NA
chr1_111813600_111814200	0.0131712	0.00989124	0.321072	0.646748	-2.78783	0.901634	0.257217	1.06447	0.905124	0.0162671	0.282405	-3.68947	1.39726	-2.64049	0.0156873	0.00197868
chr1_111814200_111814800	0.101969	0.00813221	0.33478	0.438	-2.99297	0.922736	0.265892	1.11312	0.953039	0.0150588	0.291304	-3.9157	1.46538	-2.67215	0.0146424	0.00187809
chr1_111816000_111816600	0.720891	0.0118634	0.0474898	-0.0885511	-3.61265	-2.40727	0.247307	1.41509	1.20286	NA	NA	NA	NA	NA	NA	NA
chr1_111819000_111819600	0.258065	0.08329	0.00139767	0.254847	-2.26182	-3.61408	0.224324	1.2957	1.10624	NA	NA	NA	NA	NA	NA	NA
chr1_111819600_111820200	0.486537	0.593756	0.0501967	0.16885	0.543329	-1.70127	0.241952	1.01604	0.8605	0.212589	0.0821803	2.2446	1.33147	1.68581	0.107371	0.00880735
chr1_111823800_111824400	0.649916	0.000160063	0.163141	0.102153	-5.16837	-1.58875	0.224533	1.32822	1.13263	NA	NA	NA	NA	NA	NA	NA
chr1_111824400_111825000	0.895208	0.00155133	0.130503	0.0306608	-4.18399	-1.68071	0.232312	1.29342	1.10431	NA	NA	NA	NA	NA	NA	NA
chr1_111828600_111829200	0.467255	0.099663	0.00200495	-0.179463	-2.45357	-3.86975	0.246128	1.47931	1.22663	NA	NA	NA	NA	NA	NA	NA
chr1_111829200_111829800	0.431966	0.0275769	0.0599617	-0.19518	-2.913	-2.11922	0.247585	1.30693	1.11655	NA	NA	NA	NA	NA	NA	NA
chr1_111829800_111830400	0.127224	0.00341265	0.0390016	-0.385557	-4.62027	-2.70714	0.251148	1.54836	1.29793	NA	NA	NA	NA	NA	NA	NA
chr1_1118400_1119000	0.31386	0.00153676	0.000628673	-0.175552	-3.91009	-3.61781	0.173615	1.20765	1.03184	NA	NA	NA	NA	NA	NA	NA
chr1_111841800_111842400	0.316683	0.190399	0.000503079	0.249649	-1.97761	-4.44754	0.248344	1.50225	1.24551	NA	NA	NA	NA	NA	NA	NA
chr1_111843000_111843600	0.549127	0.00244966	0.109305	0.148542	-4.44516	-1.951	0.247293	1.43798	1.20983	NA	NA	NA	NA	NA	NA	NA
chr1_111844200_111844800	0.491947	0.0988054	0.139606	-0.183819	-2.24343	-1.71257	0.26671	1.34915	1.15204	NA	NA	NA	NA	NA	NA	NA
chr1_111844800_111845400	0.212489	0.669791	0.00467969	0.328267	-0.576272	-3.31359	0.261975	1.34823	1.15088	NA	NA	NA	NA	NA	NA	NA
chr1_111846600_111847200	0.915327	0.0947678	0.0092423	0.0283308	-2.63662	-3.48157	0.265934	1.56633	1.31712	NA	NA	NA	NA	NA	NA	NA
chr1_111847200_111847800	0.00771019	0.00912153	0.292758	-0.673359	-3.36839	-1.14797	0.248694	1.27204	1.08662	NA	NA	NA	NA	NA	NA	NA
chr1_111847800_111848400	0.26	0.0139438	0.109114	-0.271579	-3.08026	-1.70486	0.24003	1.23546	1.05662	NA	NA	NA	NA	NA	NA	NA
chr1_111848400_111849000	0.312497	0.2347	0.00511039	0.229391	-1.35036	-2.75907	0.226218	1.13095	0.96828	NA	NA	NA	NA	NA	NA	NA
chr1_111849000_111849600	0.531393	0.276895	0.000485893	-0.123371	-1.14577	-3.20046	0.196576	1.04923	0.893762	NA	NA	NA	NA	NA	NA	NA
chr1_111849600_111850200	0.856709	0.0229872	0.0028796	0.0381575	-2.80357	-3.16291	0.210893	1.21812	1.04068	NA	NA	NA	NA	NA	NA	NA
chr1_111854400_111855000	0.464194	0.64865	0.00614653	0.186153	0.507691	-2.64903	0.253553	1.1116	0.950695	0.230615	0.0290878	3.15672	1.46269	2.15816	0.0432508	0.00427839
chr1_111855000_111855600	0.0915532	0.481773	0.00135754	0.409328	-0.857408	-3.40622	0.240764	1.21527	1.03977	NA	NA	NA	NA	NA	NA	NA
chr1_111855600_111856200	0.485367	0.027567	0.00534067	0.162905	-2.99836	-3.25157	0.232807	1.34513	1.14714	NA	NA	NA	NA	NA	NA	NA
chr1_111856200_111856800	0.305675	0.00139735	0.0545696	-0.234139	-4.30257	-2.18035	0.227655	1.31696	1.12378	NA	NA	NA	NA	NA	NA	NA
chr1_111856800_111857400	0.633521	0.0224265	0.00467035	0.112136	-3.26305	-3.46136	0.234628	1.41179	1.20193	NA	NA	NA	NA	NA	NA	NA
chr1_111857400_111858000	0.0650626	0.0222234	0.0646963	0.473379	-3.21531	-2.20711	0.254377	1.38899	1.18438	NA	NA	NA	NA	NA	NA	NA
chr1_11185800_11186400	0.336654	0.0546816	0.0999688	0.250732	-2.62895	-1.91689	0.259976	1.35563	1.15679	NA	NA	NA	NA	NA	NA	NA
chr1_111875400_111876000	0.269446	0.00615857	0.0793443	-0.271156	-3.86841	-2.09422	0.244466	1.38865	1.18405	NA	NA	NA	NA	NA	NA	NA
chr1_111876000_111876600	0.4889	0.00552138	0.0246212	-0.163111	-3.98042	-2.72389	0.235005	1.40991	1.19766	NA	NA	NA	NA	NA	NA	NA
chr1_111877800_111878400	0.123088	0.0520156	0.101292	-0.396529	-2.55749	-1.8387	0.255454	1.3039	1.11397	NA	NA	NA	NA	NA	NA	NA
chr1_111878400_111879000	0.770498	9.28262e-07	1.16553e-21	-0.069067	2.16713	4.35296	0.23625	0.420081	0.375351	0.00157885	0.00337278	-2.18582	0.563344	-3.88009	0.000931094	0.00026779
chr1_111880800_111881400	0.036119	0.0133862	0.0140827	-0.484793	-3.32555	-2.81664	0.228889	1.32576	1.1314	NA	NA	NA	NA	NA	NA	NA
chr1_111881400_111882000	0.133377	0.00202796	0.137512	-0.291641	-3.30154	-1.32729	0.193066	1.04771	0.888092	NA	NA	NA	NA	NA	NA	NA
chr1_111882000_111882600	0.246408	0.000727975	0.00493861	0.183573	-3.45943	-2.41919	0.157643	0.998922	0.84557	NA	NA	NA	NA	NA	NA	NA
chr1_111882600_111883200	0.452025	0.0075363	0.000448583	0.141362	-3.31846	-3.75967	0.187392	1.22201	1.04324	NA	NA	NA	NA	NA	NA	NA
chr1_111888600_111889200	0.175706	0.000447618	0.0941585	-0.319685	-5.15953	-2.03924	0.234772	1.43143	1.20918	NA	NA	NA	NA	NA	NA	NA
chr1_11189400_11190000	0.722621	0.0089334	0.305686	0.0789335	-2.79208	-0.923544	0.221882	1.05145	0.897988	NA	NA	NA	NA	NA	NA	NA
chr1_111895200_111895800	0.49481	0.00808374	0.0582523	0.149419	-3.09134	-1.87906	0.218241	1.14881	0.983276	NA	NA	NA	NA	NA	NA	NA
chr1_111895800_111896400	0.401	0.000925073	0.0336979	0.160833	-3.76823	-2.03885	0.190862	1.1109	0.949664	NA	NA	NA	NA	NA	NA	NA
chr1_111897000_111897600	0.879631	0.0239741	0.00304476	-0.035404	-3.36475	-3.78123	0.233317	1.47259	1.25157	NA	NA	NA	NA	NA	NA	NA
chr1_111897600_111898200	0.024138	0.19031	0.0264459	-0.742835	-2.49805	-3.52107	0.325488	1.89722	1.56788	NA	NA	NA	NA	NA	NA	NA
chr1_11190000_11190600	0.0350281	0.0131462	0.152962	-0.56783	-3.72108	-1.79135	0.266483	1.47949	1.24594	NA	NA	NA	NA	NA	NA	NA
chr1_111901800_111902400	0.686546	0.105914	0.000229034	-0.0921796	-2.26794	-4.44785	0.227901	1.39273	1.17265	NA	NA	NA	NA	NA	NA	NA
chr1_111903000_111903600	0.373477	0.031357	0.113945	0.233338	-3.04809	-1.90137	0.26126	1.40038	1.19459	NA	NA	NA	NA	NA	NA	NA
chr1_111904200_111904800	0.531437	0.00175025	0.0778182	-0.151593	-4.61792	-2.16547	0.241571	1.44429	1.21802	NA	NA	NA	NA	NA	NA	NA
chr1_111904800_111905400	0.866923	1.89124e-05	0.707129	-0.0332921	-4.72557	-0.340721	0.198277	1.06307	0.90483	NA	NA	NA	NA	NA	NA	NA
chr1_111905400_111906000	0.651836	0.015912	0.0218996	-0.0970781	-2.80005	-2.2757	0.214641	1.14585	0.980643	NA	NA	NA	NA	NA	NA	NA
chr1_111920400_111921000	0.826014	0.109157	0.390586	0.0555825	-1.78986	-0.818475	0.252338	1.10943	0.950061	NA	NA	NA	NA	NA	NA	NA
chr1_111923400_111924000	0.773839	0.0126155	0.12353	-0.0733051	-3.44054	-1.79966	0.254559	1.35971	1.16077	NA	NA	NA	NA	NA	NA	NA
chr1_111924000_111924600	0.0517208	0.0065765	0.0428144	-0.477448	-3.93923	-2.4511	0.243109	1.42568	1.19797	NA	NA	NA	NA	NA	NA	NA
[truncated: 512,743+ more rows]
